# Supplementary material for: The analysis of the ferroptosis metabolic regulatory network in patients with intrauterine adhesions (IUA) using a metabolomics approach
Source: Research Square preprint supplement (doi:10.21203/rs.3.rs-5817199/v1), 2025-01-15
Supplement: Supplementary file 1 [file 0dc329d44ce9f7398b315266.xlsx]

## Sheet: B_A
ID	m/z	Retention time (min)	Ion mode	Metabolites	Compound ID	Compound ID	Super Class	Class	Sub Class	level	kegg	Score	Fragmentation Score	Adducts	Formula	Mass Error (ppm)	VIP	P-value	adj.P-value	log2(FC)	FC	average(B)	average(A)	B1	B2	B3	B4	B6	A1	A2	A3	A4	A5	A6
12.28_826.5600m/z	826.56	12.2763	neg	PE-NMe(18:0/20:4(5Z,8Z,11Z,14Z))	HMDB0113098	HMDB0113098	Lipids and lipid-like molecules	Glycerophospholipids	Glycerophosphoethanolamines			55.2	86.9	M+FA-H	C44H80NO8P	-0.447352	17.9392	0.0303849	0.482494	4.04216	16.4745	1.30272e+06	79074.9	710739	2.37283e+06	2.75773e+06	473494	198808	106352	22281.1	9941.11	8971.85	31515.3	295388
14.88_282.2794m/z	282.279	14.8782	pos	Oleamide	4115	HMDB0002117	Lipids and lipid-like molecules	Fatty Acyls	Fatty amides	*	C19670	55.5	81.7	M+H	C18H35NO	1.03408	9.59968	0.0472202	0.507831	-0.219229	0.859024	2.58255e+06	3.00637e+06	2.71017e+06	2.27763e+06	2.93916e+06	2.04865e+06	2.93714e+06	2.93755e+06	2.68778e+06	3.17938e+06	3.21327e+06	3.07842e+06	2.94183e+06
11.44_181.0146m/z	181.015	11.4442	pos	3,4-Dihydroxyphthalate	65934	HMDB0001866	Unclassified	Unclassified	Unclassified			36.5	0	M+H-H2O	C8H6O6	7.4351	9.33656	0.0160196	0.469618	-0.348051	0.785645	1.20756e+06	1.53703e+06	1.30096e+06	1.0964e+06	1.4307e+06	848627	1.36113e+06	1.66651e+06	1.39647e+06	1.52903e+06	1.71431e+06	1.47757e+06	1.43832e+06
0.77_338.9887m/z	338.989	0.769183	neg	D-myo-Inositol-2,4-diphosphate	45098	HMDB0006235	Unclassified	Unclassified	Unclassified			50.4	54.5	M-H	C6H14O12P2	-0.191691	9.16504	0.024141	0.472869	-0.9351	0.523006	346767	663026	303973	436752	468994	183959	340156	1.10305e+06	430914	555746	698234	679658	510556
13.01_226.9517m/z	226.952	13.0065	pos	3-Chloro-2-methyldienelactone	HMDB0060368	HMDB0060368	Lipids and lipid-like molecules	Fatty Acyls	Fatty acids and conjugates	*	C18309	40.5	36.1	M+K	C7H5ClO4	4.6271	8.49073	0.000313743	0.173943	-0.766966	0.587652	306425	521439	341949	275885	354840	209898	349550	587453	455971	523357	592737	525694	443421
0.71_316.9478m/z	316.948	0.705333	neg	beta-D-fructose 2,6-bisphosphate	HMDB0304539	HMDB0304539	Organic oxygen compounds	Organooxygen compounds	Carbohydrates and carbohydrate conjugates	**	C00665	39.1	2.16	M-H2O-H	C6H10O12P2-4	2.71059	8.48123	0.0172962	0.469618	0.91046	1.87964	550566	292910	453341	486097	472211	820066	521116	97590.5	390592	478994	170504	334708	285070
8.64_273.2670n	274.274	8.64493	pos	C16 Sphinganine	41556	HMDB0242181	Lipids and lipid-like molecules	Sphingolipids	Sphingoid bases			48.5	46.1	M+H, M+Na	C16H35NO2	0.840873	6.97237	0.021913	0.469618	0.708709	1.63434	524055	320652	587713	359563	344472	560160	768367	335062	263854	362456	321769	360660	280112
11.68_256.2637m/z	256.264	11.6787	pos	Palmitic amide	HMDB0012273	HMDB0012273	Lipids and lipid-like molecules	Fatty Acyls	Fatty amides	***		41.9	13.8	M+H	C16H33NO	0.870017	6.36529	0.0288765	0.476704	-0.312139	0.805447	679875	844097	724843	625756	816691	471618	760469	925393	764622	832868	933582	817156	790963
0.73_248.9604m/z	248.96	0.726883	neg	5-(4-Chloro-3-hydroxy-1-butynyl)-2,2'-bithiophene	HMDB0033269	HMDB0033269	Organoheterocyclic compounds	Bi- and oligothiophenes	Unclassified			38.3	29.4	M-H2O-H	C12H9ClOS2	-0.397742	5.93735	0.0193345	0.469618	0.602621	1.51847	366277	241214	319873	326941	341528	473623	369422	121002	279750	352870	194156	271153	228354
12.37_456.8391m/z	456.839	12.3709	pos	3-(3,5-Diiodo-4-hydroxyphenyl)lactate	HMDB0059636	HMDB0059636	Phenylpropanoids and polyketides	Phenylpropanoic acids	Unclassified		C04367	43.6	26	M+Na	C9H8I2O4	-3.05558	5.17316	0.000365438	0.176545	-0.690249	0.619747	130673	210850	141728	111555	141716	106029	152339	236705	181197	214093	243056	208724	181322
8.74_317.2934n	318.301	8.7433	pos	4-hydroxysphinganine	HMDB0304183	HMDB0304183	Lipids and lipid-like molecules	Sphingolipids	Sphingoid bases	**	C12144	41.5	12.5	M+H, M+Na	C18H39NO3	1.20432	4.1342	0.0209083	0.469618	1.62327	3.08072	106407	34539.7	148395	61658.3	39557.7	188330	94094.4	13673.6	35454.2	50759.7	31677.6	23510.4	52162.5
13.19_226.0123m/z	226.012	13.1866	pos	2-(Acetamidomethylene)succinate	63871	63871	Unclassified	Unclassified	Unclassified			38	0	M+K	C7H9NO5	5.76804	3.82337	0.0298953	0.479558	-0.301575	0.811366	253708	312692	278545	232471	297142	178473	281907	336549	277646	310634	347719	311657	291946
10.87_453.2862n	454.293	10.8721	pos	PE(16:0/0:0)	40776	40776	Lipids and lipid-like molecules	Glycerophospholipids	Glycerophosphoethanolamines	*		56.3	85.2	M+H, M+Na, M+H-H2O	C21H44NO7P	1.34781	3.72348	0.0132863	0.452316	-0.991801	0.50285	51590.5	102596	59686	47147.1	65382.4	46944.7	38792.4	138121	81813.3	147460	97026.9	99063.3	52093.9
14.77_136.0217m/z	136.022	14.7693	pos	Benzothiazole	HMDB0032930	HMDB0032930	Organoheterocyclic compounds	Benzothiazoles	Unclassified			40.4	6.36	M+H	C7H5NS	1.19577	3.57954	0.0336499	0.485104	-0.235807	0.84921	304130	358133	329199	276886	351141	232967	330457	361802	322596	367856	383091	363147	350306
0.85_144.1021m/z	144.102	0.84955	pos	xi-4-Hydroxy-4-methyl-2-cyclohexen-1-one	HMDB0033629	HMDB0033629	Organic oxygen compounds	Organooxygen compounds	Carbonyl compounds			42.5	21.7	M+NH4	C7H10O2	1.55617	3.44795	0.0393678	0.497516	-1.139	0.454074	41190.9	90713.9	43748.6	65015.5	49055.2	10152.7	37982.4	127560	68744.7	103148	122401	106112	16318.2
0.79_565.0479m/z	565.048	0.78745	neg	UDP-D-galactose	3599	HMDB0012305	Nucleosides, nucleotides, and analogues	Pyrimidine nucleotides	Pyrimidine nucleotide sugars	**	C00052	52.9	66.8	M-H	C15H24N2O17P2	0.193312	3.39401	0.0359459	0.490035	-2.84054	0.139609	7441.94	53305.8	788.671	310.961	23432.3	5.88962e-06	12677.8	104876	9305.09	14721.2	94853.4	58220.6	37858.3
9.75_301.2984n	302.306	9.74973	pos	Enigmol	53958	53958	Lipids and lipid-like molecules	Sphingolipids	Sphingoid bases			52.3	65.9	M+H, M+Na	C18H39NO2	1.05761	3.31879	0.049054	0.511225	0.606777	1.52285	155578	102162	169737	94833.5	103369	192025	217924	128792	72904	106550	107105	105232	92388.4
0.81_339.9965n	362.986	0.809917	pos	Fructose-1,6-diphosphate	HMDB0244240	HMDB0244240	Organic oxygen compounds	Organooxygen compounds	Carbohydrates and carbohydrate conjugates	**	C05378	49	52.6	M+H-H2O, M+Na	C6H14O12P2	1.18835	3.27705	0.0214932	0.469618	-1.19479	0.436849	30826.1	70564.6	29800	39247.4	48163.6	7623.73	29295.6	119445	39005.8	57157.1	61209.1	88190.1	58380.3
1.19_405.2097m/z	405.21	1.1916	pos	15beta-Hydroxy-7alpha-mercapto-pregn-4-ene-3,20-dione 7-acetate	70424	70424	Unclassified	Unclassified	Unclassified			44.1	37.9	M+H	C23H32O4S	0.846288	3.24175	0.023635	0.472869	1.4174	2.67104	63562.9	23797.1	38986	56085.9	55211.6	104957	62574.4	5.88962e-06	64652.5	18239.5	2030.7	26470.1	31389.8
1.21_348.0709m/z	348.071	1.21112	pos	Adenosine 3'-monophosphate	63401	HMDB0003540	Nucleosides, nucleotides, and analogues	Ribonucleoside 3'-phosphates	Unclassified	**	C01367	53.6	76.1	M+H	C10H14N5O7P	1.66286	3.16217	0.0199987	0.469618	1.49959	2.82762	57138.2	20207.1	54607.8	32888.7	93238.5	33569.4	71386.6	1891.8	29160.7	14143	3620.72	23778.5	48648.2
11.08_478.2938m/z	478.294	11.0767	neg	PE(0:0/18:1(11Z))	LMGP02050039	LMGP02050039	Lipids and lipid-like molecules	Glycerophospholipids	Glycerophosphoethanolamines			45.3	29.2	M-H	C23H46NO7P	-0.197762	3.12133	0.0145085	0.461511	-0.566337	0.675329	66886.3	99042.5	91726	61858.4	55278	71741.6	53827.5	135284	88602.6	101810	98121.5	84587.4	85849.5
10.85_452.2783m/z	452.278	10.8466	neg	1-(2-methoxy-6Z-pentadecenyl)-sn-glycero-3-phosphoethanolamine	LMGP02060012	LMGP02060012	Lipids and lipid-like molecules	Glycerophospholipids	Glycerophosphoethanolamines			45.4	29.1	M-H	C21H44NO7P	0.104247	3.09792	0.0306542	0.482494	-0.796441	0.575768	53175	92355	50752.8	67775.7	58210	58430.9	30705.8	128488	72154.7	133024	81026.5	84697	54739.6
0.81_342.1166n	381.08	0.809917	pos	D-Maltose	HMDB0000163	HMDB0000163	Organic oxygen compounds	Organooxygen compounds	Carbohydrates and carbohydrate conjugates	***	C00208	39	0	M+H-H2O, M+NH4, M+K	C12H22O11	1.12705	2.97393	0.0196012	0.469618	-1.51075	0.35093	19975.8	56922.4	18686.7	18658.6	14736	16741.7	31055.9	44107.1	59808.4	110226	47144.1	53059.5	27189.8
14.74_284.2714n	283.264	14.7405	neg	Stearic acid	HMDB0000827	HMDB0000827	Lipids and lipid-like molecules	Fatty Acyls	Fatty acids and conjugates	**	C01530	39.3	0	M-H, M+FA-H, 2M-H	C18H36O2	-0.560849	2.89907	0.0129935	0.449412	0.156393	1.1145	281101	252222	257155	303132	278707	300269	266243	241655	270128	253516	251916	244398	251720
12.37_318.2774n	341.267	12.3709	pos	1-O-(2R-hydroxy-pentadecyl)-sn-glycerol	LMGL01020062	LMGL01020062	Lipids and lipid-like molecules	Glycerolipids	Monoradylglycerols			39.7	2.75	M+H, M+NH4, M+Na	C18H38O4	1.28571	2.82302	0.0131845	0.452316	-0.207393	0.866101	188256	217360	196893	173414	209407	166249	195315	228241	198800	209850	232272	226895	208101
1.15_148.9773m/z	148.977	1.14785	pos	Dimethyl hydrogen phosphite	73109	HMDB0012209	Unclassified	Unclassified	Unclassified			37.7	0	M+K	C2H7O3P	7.79587	2.75721	0.0246652	0.472869	-0.37255	0.772416	103839	134434	110088	89060.8	120810	76267.5	122968	147404	111449	146520	151482	134358	115390
3.14_445.1209m/z	445.121	3.14155	pos	p-Hydroxyphenytoin glucuronide	1851	HMDB0060769	Unclassified	Unclassified	Unclassified			36	0	M+H	C21H20N2O9	-7.30832	2.74648	0.00980042	0.424608	-0.522134	0.696341	61590.6	88449	73662.9	62243.7	72206.8	37929.4	61910.4	99298.6	69599.3	96981.5	101275	86522.5	77016.6
1.18_346.0557m/z	346.056	1.1804	neg	N-Acetyl-D-galactosamine 1-phosphate	HMDB0006480	HMDB0006480	Organic oxygen compounds	Organooxygen compounds	Carbohydrates and carbohydrate conjugates	*		43.6	29.7	M+FA-H	C8H16NO9P	4.077	2.72736	0.00380227	0.327249	1.5351	2.89808	35967.6	12410.8	27305.7	25764.9	55052.7	27225.4	44489.3	4617.62	17078.4	9668.56	6626.07	14580.5	21893.9
0.54_205.0174m/z	205.017	0.539983	pos	3-Methylcatechol 1-sulfate	HMDB0240662	HMDB0240662	Organic acids and derivatives	Organic sulfuric acids and derivatives	Arylsulfates			36.4	0	M+H	C7H8O5S	4.43248	2.63062	0.000307195	0.173943	-0.833109	0.561318	27352.4	48728.8	25616.2	26693.8	35220.9	20515.2	28715.8	52001.3	53042.2	48887.2	56913.1	38295.1	43233.8
2.90_180.9902m/z	180.99	2.89792	pos	(2E,4Z)-2-hydroxy-6-oxohexa-2,4-dienoic acid	LMFA01030926	LMFA01030926	Lipids and lipid-like molecules	Fatty Acyls	Fatty Acids and Conjugates			39.3	4.6	M+K	C6H6O4	2.77495	2.62995	0.0466572	0.507392	-0.318222	0.802057	123907	154487	129910	103707	146734	91463.5	147721	169008	125515	163075	173268	157435	138619
0.54_196.0171m/z	196.017	0.539983	pos	Omethoate	72448	72448	Unclassified	Unclassified	Unclassified			36.3	0	M+H-H2O	C5H12NO4PS	-9.88537	2.62452	0.00029153	0.173943	-0.664974	0.6307	34673.4	54976.1	37005.3	31919.7	38424.4	26831.9	39185.9	65079.2	51997.6	57113.4	55309.3	54650.2	45707
0.73_899.7333n	880.715	0.726883	neg	PC(20:1(11Z)/24:0)	59768	HMDB0008322	Lipids and lipid-like molecules	Glycerophospholipids	Glycerophosphocholines	**	C00157	37.1	0	M-H2O-H, M-H	C52H102NO8P	-1.11425	2.59442	0.0427831	0.506324	-3.5468	0.0855668	2669.41	31196.8	162.714	1656.96	5262.29	5844.36	420.731	52137	1293.28	23880.3	73244	24599.3	12026.6
3.88_309.2041m/z	309.204	3.87687	pos	16-Hydroxy-10-oxohexadecanoic acid	HMDB0041287	HMDB0041287	Lipids and lipid-like molecules	Fatty Acyls	Fatty acids and conjugates	*		39	2.49	M+Na	C16H30O4	1.57592	2.59085	0.0456766	0.506324	-0.412086	0.751536	87197.3	116026	102982	65676.4	103070	56098.1	108160	128461	85638.6	130923	124899	117104	109127
0.77_293.0425m/z	293.043	0.769183	neg	(E)-2-(2-Furyl)-3-(5-nitro-2-furyl)acrylamide	66225	66225	Unclassified	Unclassified	Unclassified			37.7	0	M+FA-H	C11H8N2O5	3.99595	2.4923	0.0310325	0.482969	0.951878	1.93439	52362.2	27069.1	55541.2	42527.4	51785.2	38964.4	72992.7	7817.8	41865	17610	8304.74	35299.1	51517.9
1.27_271.0432n	316.041	1.26567	neg	3,5-Dinitro-L-tyrosine	65936	HMDB0003474	Unclassified	Unclassified	Unclassified			39.1	0	M+FA-H, 2M-H, M-H	C9H9N3O7	-3.06034	2.48434	0.0274318	0.475068	0.696439	1.6205	65544.2	40446.9	64990.4	90200.7	59047.9	74809	38673	29244.9	59855	32481.9	29480.2	41554.7	50064.7
0.91_405.2098m/z	405.21	0.911433	pos	7α-(Thiomethyl)spironolactone sulfoxide	2484	HMDB0246238	Unclassified	Unclassified	Unclassified			41.6	24.5	M+H	C23H32O4S	1.03808	2.43117	0.0459236	0.506324	1.09487	2.13594	47313.3	22151	50424.2	47690.1	56976.6	37876.2	43599.3	1.5056	60499.5	13557.3	2620.76	17908.6	38318.7
0.91_160.1334m/z	160.133	0.911433	pos	METHACHOLINE	43545	HMDB0015654	Organic nitrogen compounds	Organonitrogen compounds	Quaternary ammonium salts		C07471	51.3	66.8	M+H	C8H17NO2	1.32439	2.40652	0.03493	0.486349	-0.892594	0.538645	28361.1	52652.8	35845.5	15600.7	45203	19901.6	25254.9	59302.9	32422.2	47473.3	71542	31000.3	74176
10.95_479.3018n	480.309	10.9505	pos	LysoPE(0:0/18:1(11Z))	HMDB0011475	HMDB0011475	Lipids and lipid-like molecules	Glycerophospholipids	Glycerophosphoethanolamines	*		51.6	63.1	M+H, M+Na	C23H46NO7P	1.35293	2.32773	0.0084138	0.40507	-0.544165	0.685788	37930.9	55309.9	52037.4	34564.7	37909.2	25935.8	39207.1	65724	52399.6	43734.6	62110	53366.4	54524.6
10.93_478.2938m/z	478.294	10.9297	neg	LysoPE(0:0/18:1(9Z))	HMDB0011476	HMDB0011476	Lipids and lipid-like molecules	Glycerophospholipids	Glycerophosphoethanolamines	*		46.4	37.5	M-H	C23H46NO7P	-0.233611	2.23292	0.0161252	0.469618	-0.43035	0.742082	48198.2	64949.9	62309.1	47703.6	40249.8	41307.2	49420.9	78641.6	57358.7	57672.8	75177	56275.6	64573.7
12.14_531.2728m/z	531.273	12.1386	neg	Borreline	67386	67386	Unclassified	Unclassified	Unclassified			38.1	0	2M-H	C17H18N2O	-7.05034	2.21373	0.0297137	0.479558	1.81958	3.52979	26429.1	7487.46	9429.26	40874.4	13374.9	45876.2	22590.9	575.365	20100	7923.07	615.453	9837.36	5873.53
0.91_484.1174m/z	484.117	0.911433	pos	Lucuminamide	87873	HMDB0031697	Organic oxygen compounds	Organooxygen compounds	Carbohydrates and carbohydrate conjugates	*		37	0	M+K	C19H27NO11	-9.31249	2.21287	0.0480021	0.507831	-1.17995	0.441365	17220.1	39015.6	21507.1	8403.06	31703.7	7515.99	16970.8	48664.9	15123.7	59696.4	34674.2	56892.2	19041.9
11.48_185.0077m/z	185.008	11.4828	pos	4-carboxy-2-hydroxy-cis,cis-muconic acid	LMFA01170072	LMFA01170072	Lipids and lipid-like molecules	Fatty Acyls	Fatty Acids and Conjugates	**	C04324	38.5	0.178	M+H-H2O	C7H6O7	-1.96634	2.19545	0.0138808	0.456042	-0.370012	0.773776	61314	79239.9	65999	55846.6	73091.1	41836.3	69796.7	86530.7	72056.9	78342	87623.5	76770.5	74116
11.45_152.0469m/z	152.047	11.4529	pos	Isoquinoline	HMDB0034244	HMDB0034244	Organoheterocyclic compounds	Isoquinolines and derivatives	Unclassified	***	C06323	36.8	0	M+Na	C9H7N	-1.20351	2.03665	0.00780061	0.40507	-0.434378	0.740013	40832.6	55178.2	45428.7	36942.1	48298.9	27411.2	46082	61903.5	50598.8	52024.4	61704	53372.7	51465.8
0.73_372.0502n	395.039	0.7301	pos	NORSTICTIC ACID	43603	43603	Unclassified	Unclassified	Unclassified			36.4	0	M+Na, M+K	C18H12O9	5.43984	2.02698	0.0484452	0.509053	0.879799	1.84012	38446.7	20893.6	37263	41722.8	30651	55999.2	26597.3	4735.5	39944.9	25837.4	7024.84	17888	29930.9
2.23_365.1354m/z	365.135	2.232	neg	Semilepidinoside B	HMDB0033108	HMDB0033108	Organic oxygen compounds	Organooxygen compounds	Carbohydrates and carbohydrate conjugates			48.2	45.9	M-H	C17H22N2O7	-0.185085	2.01215	0.0466528	0.507392	1.14965	2.2186	32315.7	14565.9	35889.7	18970.5	31542.8	22374.8	52800.9	3092.25	28410.6	7648	4302.28	13026.5	30915.5
12.16_357.1474m/z	357.147	12.1566	pos	Ubiquinone-2	HMDB0006709	HMDB0006709	Lipids and lipid-like molecules	Prenol lipids	Quinone and hydroquinone lipids	**	C00399	37.7	0	M+K	C19H26O4	3.69329	2.00934	0.000777476	0.216725	-0.773922	0.584825	17990.2	30761.6	18851.8	17073.5	24144.1	8826.06	21055.4	31745.2	30223.3	29582	34542.9	31254.5	27221.8
3.00_239.1620m/z	239.162	3.00292	pos	beta-hydroxylauric acid	74493	74493	Organic acids and derivatives	Hydroxy acids and derivatives	Medium-chain hydroxy acids and derivatives	*		38.7	0	M+Na	C12H24O3	1.2735	2.00772	0.00331184	0.303907	-0.705325	0.613304	20709.6	33767.2	30001.7	20275.2	22419.1	13582.5	17269.4	35191.1	25127.1	39759.4	33091	34446.8	34987.9
0.75_445.0535m/z	445.054	0.748083	neg	CDP-ethanolamine	HMDB0001564	HMDB0001564	Nucleosides, nucleotides, and analogues	Pyrimidine nucleotides	Pyrimidine ribonucleotides	**	C00570	42.4	18.7	M-H	C11H20N4O11P2	0.935037	1.95534	0.0310397	0.482969	1.26643	2.40565	28650.4	11909.6	38049	30142.6	18703.2	33264.3	23093.2	1973.48	29917.7	4856.32	883.3	7713.54	26113.5
1.19_169.0358m/z	169.036	1.1916	pos	Glyphosate-monoammonium	72370	HMDB0252891	Unclassified	Unclassified	Unclassified			37.5	0	M+H-H2O	C3H11N2O5P	-7.76589	1.89895	0.00808964	0.40507	-0.859451	0.551162	16204.8	29401.2	7397.86	23078.7	17912.6	10933.9	21701.1	40562	22497.8	27827.4	29469.1	25869.2	30181.7
13.40_324.2667n	325.272	13.4014	pos	(Z)-15-Oxo-11-eicosenoic acid	HMDB0029797	HMDB0029797	Lipids and lipid-like molecules	Fatty Acyls	Fatty acids and conjugates	*		38.8	0.0266	M+H-H2O, M+H	C20H36O3	0.669401	1.88775	0.0332637	0.485104	-0.302746	0.810708	61088.4	75351.9	70294.4	55241.3	66598.2	47100.1	66208.1	77406	58339.8	73346.8	77664	84978.5	80376.4
3.57_202.1555m/z	202.155	3.56655	pos	N-(3-acetamidopropyl)pyrrolidin-2-one	HMDB0061384	HMDB0061384	Organoheterocyclic compounds	Pyrrolidines	N-alkylpyrrolidines			44.9	33.9	M+NH4	C9H16N2O2	2.61673	1.8145	0.0397248	0.497516	-0.518654	0.698023	31284.9	44819.4	38425	20706	39704.2	17977.6	39611.9	53424.2	30920.6	48239	47079.3	47326.6	41926.5
14.20_439.1250m/z	439.125	14.2023	neg	6-Hydroxymusizin 8-O-b-D-glucopyranoside	HMDB0030817	HMDB0030817	Organic oxygen compounds	Organooxygen compounds	Carbohydrates and carbohydrate conjugates	*		38.9	0	M+FA-H	C19H22O9	1.05539	1.78976	0.00565072	0.371039	-0.39626	0.759825	36873.4	48528.7	30186.5	36928.7	38818.5	39965.5	38467.6	53468.2	42760.4	49938.6	57691.5	45077.4	42236.3
10.44_477.2862n	478.294	10.4438	pos	LysoPE(18:2(9Z,12Z)/0:0)	HMDB0011507	HMDB0011507	Lipids and lipid-like molecules	Glycerophospholipids	Glycerophosphoethanolamines	***		57.3	91.5	M+H, M+Na	C23H44NO7P	1.46727	1.76728	0.0188413	0.469618	-0.809747	0.570482	14148.1	24800.3	21081.5	11063.1	10908.7	10659.1	17028.3	37799	19272.1	26193.9	19251	25850.9	20435.2
2.47_504.0091m/z	504.009	2.47267	neg	alpha,beta-Methylene ATP	HMDB0248246	HMDB0248246	Unclassified	Unclassified	Unclassified			39.7	0.574	M-H	C11H18N5O12P3	-0.30494	1.76105	0.046225	0.506893	0.569061	1.48356	42635.6	28738.8	45272.2	54207.9	35162	45995.2	32540.8	18541.5	42944.3	20992.8	19191.5	31311	39451.5
1.38_298.0696m/z	298.07	1.37747	neg	Avenanthramide 1c	86155	HMDB0029284	Phenylpropanoids and polyketides	Cinnamic acids and derivatives	Hydroxycinnamic acids and derivatives	*		36.4	0	M-H	C16H13NO5	-8.18286	1.75025	0.04009	0.497516	0.778675	1.71555	30995.2	18067.1	31910.2	36008.1	28901.7	27798.9	30356.9	5127.21	36929.8	13158	9676.26	25499.1	18012.4
4.81_163.0401m/z	163.04	4.8138	neg	Phenylpyruvic acid	328	HMDB0000205	Benzenoids	Benzene and substituted derivatives	Phenylpyruvic acid derivatives	**	C00166	45	28.9	M-H	C9H8O3	-0.0420876	1.70263	0.0464697	0.507048	2.42041	5.35323	13587.6	2538.2	1646.09	21017.3	30179.2	10182.2	4913.15	1881.61	2720.01	3889.81	1975.57	2886.66	1875.54
0.54_152.9951m/z	152.995	0.539983	pos	3-oxo-4-pentenoic acid	LMFA01060166	LMFA01060166	Lipids and lipid-like molecules	Fatty Acyls	Fatty Acids and Conjugates			40.2	7.5	M+K	C5H6O3	2.33192	1.66975	0.000697148	0.2077	-0.511434	0.701525	20293.7	28927.9	20761.2	18444.2	24011.8	15387.6	22863.5	32202.1	27779.3	29232.5	29989.2	28676.9	25687.6
11.55_259.2059m/z	259.206	11.5465	pos	Stearidonic acid	LMFA01030357	LMFA01030357	Lipids and lipid-like molecules	Fatty Acyls	Lineolic acids and derivatives	**	C16300	46.8	39.5	M+H-H2O	C18H28O2	1.11027	1.61072	0.010137	0.427895	-0.405705	0.754867	28610.2	37900.9	31969.4	27985.9	35043.6	18366	29685.8	41003.1	33738.6	36503	41128.7	38716.4	36315.7
10.42_476.2782m/z	476.278	10.4184	neg	PE(0:0/18:2(9Z,12Z))	LMGP02050041	LMGP02050041	Lipids and lipid-like molecules	Glycerophospholipids	Glycerophosphoethanolamines			48.6	48	M-H	C23H44NO7P	-0.177192	1.59306	0.00662608	0.397942	-0.716181	0.608707	12610.9	20717.6	16265.9	14442.4	10274.3	10899.1	11172.9	28062.1	14422.3	19851.6	18985.4	23118.4	19865.7
11.72_276.1603m/z	276.16	11.7156	neg	Metazocine	69220	HMDB0014798	Unclassified	Unclassified	Unclassified			39.4	0	M+FA-H	C15H21NO	-0.98525	1.5632	0.0313637	0.484694	0.19657	1.14597	77442.8	67578.3	74687.7	66443	82546.3	83301.1	80235.7	68818.4	66237.3	68044.2	76501.6	67688.2	58180.4
11.63_265.2529m/z	265.253	11.6349	pos	Elaidic acid	HMDB0000573	HMDB0000573	Lipids and lipid-like molecules	Fatty Acyls	Fatty acids and conjugates	***	C01712	38.5	0	M+H-H2O	C18H34O2	1.04129	1.55579	0.0365086	0.491807	-0.324498	0.798576	39272.8	49178.5	44065.7	36030.1	47057	24960.4	44250.5	53843.1	44316.8	47129.6	53573.4	49681.3	46526.5
11.55_190.0501m/z	190.05	11.5465	pos	1-Nitro-5,6-dihydroxy-dihydronaphthalene	HMDB0060328	HMDB0060328	Benzenoids	Naphthalenes	Nitronaphthalenes	**	C14801	39.5	1.72	M+H-H2O	C10H9NO4	0.964383	1.55564	0.0425428	0.505409	-0.301262	0.811542	43933.7	54136.1	48035.3	40240	52505.9	31245.1	47642.4	62061.2	47287.8	56602.3	58930.2	51723.2	48212
13.55_201.9393m/z	201.939	13.5465	pos	2-Thiothiazolidine-4-carboxylic acid	HMDB0041805	HMDB0041805	Organic acids and derivatives	Carboxylic acids and derivatives	Amino acids, peptides, and analogues	*		37.1	0	M+K	C4H5NO2S2	-0.219264	1.52191	7.20979e-05	0.151542	-0.854131	0.553198	8426.36	15232.1	9073.55	7047.74	9811.28	6079.22	10120	15964.3	13872.6	16536.3	16997.9	14786.1	13235.4
15.09_205.0862m/z	205.086	15.0918	pos	Edrophonium	HMDB0015145	HMDB0015145	Benzenoids	Benzene and substituted derivatives	Aniline and substituted anilines		C06976	39.7	0	M+K	C10H16NO+	-0.666262	1.50798	0.0221853	0.469618	-0.263385	0.833131	46214	55470.3	50437.2	39788.6	52757	36719	51368.3	52775.6	51101.9	59364.4	58980.3	56703	53896.7
10.85_520.2664m/z	520.266	10.8466	neg	LysoPS(18:2(9Z,12Z)/0:0)	HMDB0240604	HMDB0240604	Lipids and lipid-like molecules	Glycerophospholipids	Glycerophosphoserines			39.2	6.6	M-H	C24H44NO9P	-3.1668	1.49034	0.0326389	0.485104	-0.810205	0.570301	12159.6	21321.5	12069.9	14021.5	12304.5	14983.1	7419.26	28563.5	17080.2	32626.1	16215.8	20131.9	13311.2
15.09_190.0501m/z	190.05	15.0918	pos	2-Oxo-1,2-dihydroquinoline-4-carboxylate	71292	71292	Unclassified	Unclassified	Unclassified			39.4	0.597	M+H	C10H7NO3	1.08142	1.45756	0.0232249	0.471324	-0.251631	0.839946	45411.3	54064.6	49909.9	40041.4	51677.9	35571.4	49856.1	51607.3	50255.1	57989.2	55717.6	55584.3	53234
12.84_311.2561m/z	311.256	12.8406	pos	METHOPRENE (S)	44012	44012	Unclassified	Unclassified	Unclassified			42.2	24	M+H	C19H34O3	-6.4764	1.45724	0.0238011	0.472869	-0.30382	0.810104	35918.7	44338.3	40452.6	31873.9	39476.6	26076.5	41713.9	43317.4	38414	45344.3	46753	47948.9	44252.4
14.61_201.9759m/z	201.976	14.6128	pos	3-Methylsulfinylpropyl isothiocyanate	58356	HMDB0006095	Organosulfur compounds	Sulfoxides	Unclassified	*		37.9	0	M+K	C5H9NOS2	1.30754	1.45649	0.0294369	0.479053	-0.254422	0.838323	48616.9	57993.1	47666.1	41942.5	57120.7	40114.3	56241	56488.5	51578.8	61112.8	62398.1	59197.1	57183.3
0.54_109.0228m/z	109.023	0.539983	pos	2-(Methylthio)pyrazine	89031	HMDB0033152	Organosulfur compounds	Thioethers	Aryl thioethers			36.2	0	M+H-H2O	C5H6N2S	7.51813	1.40115	0.000662111	0.2077	-0.566505	0.67525	12487.6	18493.3	13621.9	10811.3	14867.1	9566.12	13571.6	20809.4	17980.6	19301.6	19366.7	17675.4	15826.1
10.22_219.1746m/z	219.175	10.2242	pos	(5alpha,10alpha)-3,7(11)-Eudesmadien-2-one	90429	HMDB0035081	Lipids and lipid-like molecules	Prenol lipids	Sesquiterpenoids	*		49.8	53.6	M+H	C15H22O	1.2327	1.39781	0.0475742	0.507831	-0.224467	0.855911	50186.9	58635.7	52767.8	41667.3	52884.4	43092.4	60522.6	61486	59043.7	58940.4	64606.6	53555.7	54181.7
4.08_201.1100m/z	201.11	4.07605	pos	2-hydroxy-decanedioic acid	74931	HMDB0000424	Lipids and lipid-like molecules	Fatty Acyls	Fatty Acids and Conjugates			37	0	M+H-H2O	C10H18O5	-9.63408	1.39398	0.0333643	0.485104	-0.675769	0.625999	14393	22992	13779.6	13578.3	14701.8	9293.25	20611.9	21078	18859.3	32567.6	20438.5	29682.9	15325.8
6.49_315.1342m/z	315.134	6.48768	pos	(S)-Annocherine A	HMDB0038723	HMDB0038723	Organoheterocyclic compounds	Isoquinolines and derivatives	Benzylisoquinolines			47.5	41.2	M+NH4	C17H15NO4	0.840577	1.37776	0.0188477	0.469618	-0.557117	0.679659	15910.1	23408.9	18640.9	16666.9	18882	8506.09	16854.5	22481.8	25681.9	24338.9	29598.2	16401.4	21951.3
0.81_341.0038m/z	341.004	0.809917	pos	D-myo-Inositol 1,3-bisphosphate	HMDB0006234	HMDB0006234	Organic oxygen compounds	Organooxygen compounds	Alcohols and polyols	**	C04062	38	0	M+H	C6H14O12P2	1.34098	1.36596	0.0206292	0.469618	-1.44416	0.367507	3941.63	10725.3	3766.07	5500.96	6088.82	514.275	3838.04	19781.6	6044.04	8013.92	8202.85	13022.4	9287.13
1.20_369.0082m/z	369.008	1.19978	neg	Phospho-L-serine	297	HMDB0304154	Unclassified	Unclassified	Unclassified			37.9	0	2M-H	C3H8NO6P	-6.36044	1.34874	0.0033479	0.30532	1.19652	2.29186	11751.3	5127.43	16136.7	6768.27	10137.3	12851.4	12863.1	3728.79	6126.82	2465.65	4283.05	7941.79	6218.51
4.42_376.1383n	421.137	4.41778	neg	Riboflavin (Vitamin B2)	233	HMDB0000244	Unclassified	Unclassified	Unclassified			38.8	0	M-H, M+FA-H	C17H20N4O6	0.127408	1.33188	0.00180289	0.261136	2.08635	4.24671	7856.07	1849.92	9740	7163.72	4011.13	9683.41	8682.1	5.88962e-06	5481.8	1232.82	5.88962e-06	982.267	3402.62
11.78_327.2510m/z	327.251	11.7828	pos	1-O-(2R-hydroxy-tetradecyl)-sn-glycerol	LMGL01020061	LMGL01020061	Lipids and lipid-like molecules	Glycerolipids	Monoradylglycerols			38.8	0	M+Na	C17H36O4	1.22974	1.30875	0.00837509	0.40507	-0.5129	0.700812	14543.9	20752.9	15780.2	14255.9	16227.8	8926.5	17529.1	21095.7	15367.9	21688.6	22620.2	23069.9	20675.1
11.79_531.2727m/z	531.273	11.79	neg	PA(O-20:4(5Z,8Z,11Z,14Z)/2:0)	HMDB0011156	HMDB0011156	Lipids and lipid-like molecules	Glycerophospholipids	Glycerophosphates	*		38.1	0	M+FA-H	C25H43O7P	-0.343852	1.28571	0.00192637	0.267558	2.01383	4.03853	7240.23	1792.79	7104.57	8257.9	3544.04	9111.23	8183.39	5.88962e-06	3892.95	837.616	5.88962e-06	1408.38	4617.77
7.25_313.1194m/z	313.119	7.25048	neg	N,N'-Diacetylbenzidine	72940	72940	Unclassified	Unclassified	Unclassified			39.5	0	M+FA-H	C16H16N2O2	0.197088	1.28495	0.0304639	0.482494	-0.389835	0.763217	22257.2	29162.3	22908.8	21850.3	24555.2	17247.8	24723.7	28848.6	33797.1	27336.1	36999.9	23224.1	24768.2
11.63_211.0108m/z	211.011	11.6349	pos	(R)-AMAA	69672	69672	Unclassified	Unclassified	Unclassified			38	0	M+K	C6H8N2O4	-4.73393	1.2848	0.0207642	0.469618	-0.376198	0.770465	21304.4	27651.3	24612.8	19384	25394.5	13900.4	23230.3	29245.1	23160.5	27623.6	31052.2	28407.8	26418.8
14.18_479.1174m/z	479.117	14.1825	neg	(1R,6R)-6-hydroxy-2-succinylcyclohexa-2,4-diene-1-carboxylate	HMDB0303951	HMDB0303951	Unclassified	Unclassified	Unclassified			38.6	0	2M-H	C11H12O6	-4.42283	1.28207	0.00240324	0.275356	-0.528268	0.693387	12792.8	18449.8	11059.2	13052	12809.5	14988.1	12055.5	18387.6	15704	19458.8	23196.4	17765.9	16185.9
13.55_435.2388m/z	435.239	13.5465	pos	Glutathionylspermidine	63639	HMDB0060520	Unclassified	Unclassified	Unclassified			36	0	M+H	C17H34N6O5S	0.796733	1.27955	0.0473338	0.507831	-0.236613	0.848736	41036	48349.6	41492.9	38120.7	46466.5	31667.7	47432.4	51242.8	42907.8	47718.2	54176.3	48816.6	45235.9
3.55_184.0584m/z	184.058	3.54862	pos	N-methyl-L-glutamic Acid	HMDB0062660	HMDB0062660	Organic acids and derivatives	Carboxylic acids and derivatives	Amino acids, peptides, and analogues	**	C01046	39.4	3.3	M+Na	C6H11NO4	2.24242	1.27156	0.0345215	0.486131	-0.482653	0.71566	16672.4	23296.6	19443.6	12249.8	21218	10312	20138.8	26900.6	16898.5	24990.2	26032.2	24475.6	20482.2
4.16_208.0948m/z	208.095	4.16385	pos	Pseudoecgonine	HMDB0006348	HMDB0006348	Alkaloids and derivatives	Tropane alkaloids	Unclassified	*	C12449	40.4	7.46	M+Na	C9H15NO3	2.12287	1.24818	0.0325138	0.485053	-0.507568	0.703407	15251.6	21682.4	16788.2	12072.6	18748.2	9930.39	18718.6	25858.3	15894.6	25105.7	25062.7	20911.5	17261.8
11.06_219.1746m/z	219.175	11.062	pos	beta-Elemenone	53387	HMDB0039637	Lipids and lipid-like molecules	Prenol lipids	Sesquiterpenoids	*		47.2	42.5	M+H	C15H22O	1.24752	1.23887	0.0261022	0.473838	-0.349313	0.784958	22213.9	28299.5	24875.7	20291.5	25867.6	15247.5	24787.4	30904.5	24221.8	28696.5	32766.4	26456	26751.9
12.93_368.4256m/z	368.426	12.9316	pos	7(Z)-Pentacosene	64892	HMDB0302476	Unclassified	Unclassified	Unclassified			37.7	0	M+NH4	C25H50	1.43312	1.22701	0.0111147	0.436656	-0.390441	0.762896	17372.9	22772.3	19501.5	17087.3	20783.7	11297.8	18194.3	24441.6	21083.7	22201	24013.5	24573.7	20320.4
13.33_393.1716m/z	393.172	13.3283	neg	1,3,8-Trihydroxy-4-methyl-2,7-diprenylxanthone	HMDB0037298	HMDB0037298	Organoheterocyclic compounds	Benzopyrans	1-benzopyrans			36.4	0	M-H	C24H26O5	2.24889	1.22182	0.0335927	0.485104	-0.376588	0.770257	22625.6	29374.1	17893.2	21485.8	26977	21835.7	24936.2	32338.8	26101.9	31408.1	36617.7	27461.1	22316.7
4.44_376.1392n	377.146	4.44155	pos	Riboflavin	HMDB0000244	HMDB0000244	Organoheterocyclic compounds	Pteridines and derivatives	Alloxazines and isoalloxazines	***	C00255	52.2	72.3	M+H, M+Na	C17H20N4O6	2.43573	1.20469	0.0134615	0.452316	1.77247	3.41639	8354.91	2445.54	13478.3	5336.43	5018.99	6474.42	11466.4	259.44	6610.16	1463.38	310.944	1741.71	4287.62
0.83_383.1432n	406.132	0.829667	pos	Lacto-N-biose I	HMDB0006575	HMDB0006575	Organic oxygen compounds	Organooxygen compounds	Carbohydrates and carbohydrate conjugates	*	C06372	48.5	49.1	M+Na, M+K, M+H, M+H-H2O	C14H25NO11	1.07558	1.18046	0.0186333	0.469618	-0.916886	0.529651	5750.43	10857	6910.45	6167.6	5068.41	5944.6	4661.07	16241.1	8524.59	14221.2	7297.8	6950.21	11907.1
4.60_286.0564n	287.064	4.59823	pos	Glycineamideribotide	HMDB0002022	HMDB0002022	Nucleosides, nucleotides, and analogues	Glycinamide ribonucleotides	Unclassified	**	C03838	39.5	0.921	M+H, M+Na	C7H15N2O8P	-0.591655	1.15128	0.0455177	0.506324	-0.886106	0.541073	6928.33	12804.8	9007.54	4420.53	9963.38	3653.96	7596.25	10111.6	8395.55	10458.6	20938.9	17158.1	9766.06
13.34_465.1016m/z	465.102	13.3402	neg	5,7,3'-Trihydroxy-3,6,8,4',5'-pentamethoxyflavone	51775	51775	Unclassified	Unclassified	Unclassified			36.7	0	M+FA-H	C20H20O10	-5.37898	1.13401	0.0200589	0.469618	-0.390524	0.762852	17980.5	23570.1	15053.7	16463.6	23199.3	15505.2	19680.9	23503.2	21194.2	25971.1	28336.6	22629.7	19785.9
7.18_290.2692m/z	290.269	7.18463	pos	Juniperic acid	LMFA01050051	LMFA01050051	Lipids and lipid-like molecules	Fatty Acyls	Fatty Acids and Conjugates			49.2	50.7	M+NH4	C16H32O3	0.948312	1.13386	0.0341484	0.485571	1.34698	2.54379	9085.19	3571.52	9442.08	3632.13	5422.22	16130.4	10799.1	1727.91	3277.93	2631.12	3556.44	2390.4	7845.32
14.32_158.1541m/z	158.154	14.3172	pos	(±)-2,6-Dimethyl-5-heptenal	HMDB0031834	HMDB0031834	Organic oxygen compounds	Organooxygen compounds	Carbonyl compounds	*		39.3	0	M+NH4	C9H16O	1.21554	1.11022	0.0405112	0.497516	-0.221874	0.857451	33309.3	38846.9	34419.6	29428.8	38744.6	26866	37087.3	38497.6	34639.7	40180.1	41971.5	39488.6	38303.7
14.46_133.0796m/z	133.08	14.4612	pos	Isobutyl isothiocyanate	88380	HMDB0032345	Organosulfur compounds	Isothiocyanates	Unclassified	*		37.6	0	M+NH4	C5H9NS	1.50133	1.10371	0.0318582	0.485053	-0.230805	0.85216	29617.5	34755.8	30977.7	27321.8	33679.2	23046.7	33062.2	35231.7	30989.1	34851.1	37337	35670.7	34455.5
4.61_436.1726m/z	436.173	4.6084	neg	PS(6:0/6:0)	LMGP03010020	LMGP03010020	Lipids and lipid-like molecules	Glycerophospholipids	Glycerophosphoserines			50.2	57.9	M-H2O-H	C18H34NO10P	-3.54327	1.10121	0.0099057	0.426159	1.53783	2.90358	6727.18	2316.86	7691.42	4211.82	8899.64	7248.81	5584.23	378.512	3041.88	579.295	430.346	2623.11	6848.03
10.22_166.0632n	167.07	10.2242	pos	L-3-Phenyllactic acid	HMDB0000748	HMDB0000748	Phenylpropanoids and polyketides	Phenylpropanoic acids	Unclassified	***	C05607	45.4	30.5	M+H-H2O, M+H	C9H10O3	1.07464	1.07938	0.0381986	0.495124	-0.247531	0.842336	27148.3	32229.8	27580.1	22989.2	29414.8	23178.7	32579	32492.2	32579.9	32677.5	36974.1	29220.3	29434.9
12.20_259.2060m/z	259.206	12.2014	pos	(E,E)-11,13-Octadecadien-9-ynoic acid	HMDB0034382	HMDB0034382	Lipids and lipid-like molecules	Fatty Acyls	Fatty acids and conjugates	*		51.3	62.2	M+H-H2O	C18H28O2	1.18553	1.07191	0.0193317	0.469618	-0.332504	0.794157	17284.8	21765	18774.4	16253	20755.1	11529.3	19112.3	22331.3	20670.7	21516.7	23796.8	22299	19975.7
6.02_313.1195m/z	313.119	6.01773	neg	Lysergic acid	66676	HMDB0254261	Unclassified	Unclassified	Unclassified			39.5	0	M+FA-H	C16H16N2O2	0.28184	1.06566	0.0280981	0.475068	-0.303946	0.810034	19213.1	23718.9	21017.3	17496.4	23517.1	14296.6	19738.3	23570.6	26752.5	20087	23193.1	23989.1	24721.4
11.59_299.2591m/z	299.259	11.5898	neg	heptadecanal	LMFA06000097	LMFA06000097	Lipids and lipid-like molecules	Fatty Acyls	Fatty aldehydes	*		39.1	0	M+FA-H	C17H34O	-0.38311	1.05342	0.0312049	0.482969	0.523321	1.43726	13486.5	9383.47	8581.97	11893	15234	17192.8	14530.6	9348.25	8404.7	11464.4	9351.75	11440.4	6291.29
2.51_120.0580n	121.065	2.50945	pos	Lentialexin	HMDB0038997	HMDB0038997	Lipids and lipid-like molecules	Fatty Acyls	Fatty alcohols	*		41.2	13.2	M+H-H2O, M+H	C8H8O	4.33237	1.04378	0.0327678	0.485104	0.238738	1.17996	29085.3	24649.4	30052.8	28117.9	31969.3	22982.3	32304.2	23267.9	23412.4	23237.4	24257.5	25657.8	28063.4
0.73_403.9982n	426.987	0.7301	pos	Uridine diphosphate (UDP)	97	HMDB0000295	Unclassified	Unclassified	Unclassified			36.8	0	M+Na, M+K	C9H14N2O12P2	-9.90746	1.03901	0.00484538	0.347044	-1.54124	0.34359	1880.12	5471.99	2277.62	3246.17	2385.14	5.88962e-06	1491.68	7009.12	4408.49	2998.18	6886.18	4143.59	7386.4
0.97_140.0684m/z	140.068	0.974083	pos	DL-Norvaline	HMDB0251527	HMDB0251527	Organic acids and derivatives	Carboxylic acids and derivatives	Amino acids, peptides, and analogues	*	C01799	36.6	1.27	M+Na	C5H11NO2	1.85665	1.0191	0.0348966	0.486349	-0.384271	0.766166	15357.5	20044.6	14317.9	15756	20305.9	11051	15356.8	21569	18635.4	23906	21052.1	19858.3	15247.1
0.81_213.0169m/z	213.017	0.805983	neg	Butanoylphosphate	65782	65782	Unclassified	Unclassified	Unclassified			39.2	0	M+FA-H	C4H9O5P	-0.0769587	1.01236	0.0322472	0.485053	-3.35416	0.0977904	436.292	4461.5	166.526	574.621	363.42	217.893	858.999	9049.6	547.629	5488.52	4039.64	7242.19	401.426

## Sheet: Sheet1
differentially expressed metabolites
Metabolites	Compound ID	Super Class	VIP	P-value	adj.P-value	log2(FC)	FC	average(B)	average(A)	B1	B2	B3	B4	B6	A1	A2	A3	A4	A5	A6
PE-NMe(18:0/20:4(5Z,8Z,11Z,14Z))	HMDB0113098	Lipids and lipid-like molecules	17.9392	0.0303849	0.482494	4.04216	16.4745	1.30272e+06	79074.9	710739	2.37283e+06	2.75773e+06	473494	198808	106352	22281.1	9941.11	8971.85	31515.3	295388
Oleamide	4115	Lipids and lipid-like molecules	9.59968	0.0472202	0.507831	-0.219229	0.859024	2.58255e+06	3.00637e+06	2.71017e+06	2.27763e+06	2.93916e+06	2.04865e+06	2.93714e+06	2.93755e+06	2.68778e+06	3.17938e+06	3.21327e+06	3.07842e+06	2.94183e+06
3,4-Dihydroxyphthalate	65934	Unclassified	9.33656	0.0160196	0.469618	-0.348051	0.785645	1.20756e+06	1.53703e+06	1.30096e+06	1.0964e+06	1.4307e+06	848627	1.36113e+06	1.66651e+06	1.39647e+06	1.52903e+06	1.71431e+06	1.47757e+06	1.43832e+06
D-myo-Inositol-2,4-diphosphate	45098	Unclassified	9.16504	0.024141	0.472869	-0.9351	0.523006	346767	663026	303973	436752	468994	183959	340156	1.10305e+06	430914	555746	698234	679658	510556
3-Chloro-2-methyldienelactone	HMDB0060368	Lipids and lipid-like molecules	8.49073	0.000313743	0.173943	-0.766966	0.587652	306425	521439	341949	275885	354840	209898	349550	587453	455971	523357	592737	525694	443421
beta-D-fructose 2,6-bisphosphate	HMDB0304539	Organic oxygen compounds	8.48123	0.0172962	0.469618	0.91046	1.87964	550566	292910	453341	486097	472211	820066	521116	97590.5	390592	478994	170504	334708	285070
C16 Sphinganine	41556	Lipids and lipid-like molecules	6.97237	0.021913	0.469618	0.708709	1.63434	524055	320652	587713	359563	344472	560160	768367	335062	263854	362456	321769	360660	280112
Palmitic amide	HMDB0012273	Lipids and lipid-like molecules	6.36529	0.0288765	0.476704	-0.312139	0.805447	679875	844097	724843	625756	816691	471618	760469	925393	764622	832868	933582	817156	790963
5-(4-Chloro-3-hydroxy-1-butynyl)-2,2'-bithiophene	HMDB0033269	Organoheterocyclic compounds	5.93735	0.0193345	0.469618	0.602621	1.51847	366277	241214	319873	326941	341528	473623	369422	121002	279750	352870	194156	271153	228354
3-(3,5-Diiodo-4-hydroxyphenyl)lactate	HMDB0059636	Phenylpropanoids and polyketides	5.17316	0.000365438	0.176545	-0.690249	0.619747	130673	210850	141728	111555	141716	106029	152339	236705	181197	214093	243056	208724	181322
