# Supplementary material for: The analysis of the ferroptosis metabolic regulatory network in patients with intrauterine adhesions (IUA) using a metabolomics approach
Source: Research Square preprint supplement (doi:10.21203/rs.3.rs-5817199/v1), 2025-01-15
Supplement: Supplementary file 2 [file 1cfccd2e57c679b7f5ef5269.xlsx]

## Sheet: 数据矩阵
data matrix
ID	m/z	Retention time (min)	Ion mode	Metabolites	Compound ID	Super Class	Class	Sub Class	level	kegg	Score	Fragmentation Score	Adducts	Formula	Mass Error (ppm)	QC1	QC2	QC3	QC4	QC5	A1	A2	A3	A4	A5	A6	B1	B2	B3	B4	B6
1.38_268.0812n	291.07	1.38387	pos	Inosine	84	Nucleosides, nucleotides, and analogues	Purine nucleosides	Unclassified	**	C00294	58.8	97.8	M+Na, M+K, M+H	C10H12N4O5	1.58183	1.28308e+06	1.21244e+06	1.23683e+06	1.27551e+06	1.32884e+06	210662	573259	151945	219356	478300	1.21431e+06	1.1181e+06	233888	639823	810045	1.39386e+06
10.00_300.2900m/z	300.29	9.9972	pos	Sphingosine	392	Organic nitrogen compounds	Organonitrogen compounds	Amines	**	C00319	58.7	97.8	M+H	C18H37NO2	1.11076	29144.6	30394.5	24077	29343.9	30273.8	97367.5	80140.5	118029	74319.1	117345	67460.1	62011.1	111572	62869.4	43676.1	34246.9
5.17_204.0666m/z	204.067	5.17438	neg	Indolelactic acid	71	Organoheterocyclic compounds	Indoles and derivatives	Indolyl carboxylic acids and derivatives	*	C02043	58.7	95.9	M-H	C11H11NO3	-0.223728	8633.05	9341.75	9030.08	10023.9	8639.71	1591.64	2661.02	3041.07	951.791	2505.72	2766.62	1233.47	3288.43	3225.13	2476.47	4750.39
0.89_134.0215n	133.014	0.889467	neg	Malic acid	118	Organic acids and derivatives	Hydroxy acids and derivatives	Beta hydroxy acids and derivatives	**	C00149	58.5	93.1	M-H2O-H, M-H	C4H6O5	-0.325524	337625	322043	346447	376149	379174	20651.6	152916	32291.3	41113.2	82288.6	229614	108094	64098	110026	44586.6	138718
1.71_283.0684m/z	283.068	1.7067	neg	Xanthosine	3408	Nucleosides, nucleotides, and analogues	Purine nucleosides	Unclassified	**	C01762	58.5	95.4	M-H	C10H12N4O6	-0.188055	40060.5	47106.3	50288.7	44696.7	48759.7	1300.56	57770.7	9493.04	5192.07	35887.4	49431.1	27451.8	23119.4	70563.5	27116.3	33324.3
10.93_495.3331n	496.34	10.928	pos	LysoPC(0:0/16:0)	HMDB0240262	Lipids and lipid-like molecules	Glycerophospholipids	Glycerophosphocholines	***		58.5	95.1	M+H, M+K, M+Na	C24H50NO7P	1.16942	1.50889e+06	1.8234e+06	1.50168e+06	1.55184e+06	1.79138e+06	1.20776e+06	775748	631597	355596	840303	626563	758748	452021	726161	422278	662195
0.85_229.0889n	230.096	0.84955	pos	Ergothioneine	53	Organic acids and derivatives	Carboxylic acids and derivatives	Amino acids, peptides, and analogues	**	C05570	58.4	95.7	M+H, M+Na, M+K	C9H15N3O2S	1.60687	236975	232044	235511	251115	248134	493877	244126	555917	965181	99257.6	140933	81642.6	274288	250311	48220.6	67837.9
1.20_244.0694n	243.062	1.19978	neg	Uridine	90	Nucleosides, nucleotides, and analogues	Pyrimidine nucleosides	Unclassified	**	C00299	58.3	93.1	M-H, M+FA-H	C9H12N2O6	-0.722656	432154	440580	464789	447388	442368	62520.2	1.14442e+06	306327	162191	779951	1.28232e+06	1.73701e+06	691268	849598	894735	1.46548e+06
10.15_302.3057m/z	302.306	10.1485	pos	Sphinganine	395	Organic nitrogen compounds	Organonitrogen compounds	Amines	**	C00836	58.2	95.5	M+H	C18H39NO2	1.29624	13301.5	12609.9	14791.5	14469.4	13447.6	45118.9	18371.9	53099.5	32795.2	49182.8	11396	11941	36172.5	27720.6	8147.51	7682.09
10.89_540.3306m/z	540.331	10.8882	neg	1-Palmitoylphosphatidylcholine	HMDB0256091	Lipids and lipid-like molecules	Glycerophospholipids	Glycerophosphocholines	**	C04230	58.2	92.3	M+FA-H	C24H50NO7P	-0.190358	1.05926e+06	1.11424e+06	960140	1.08596e+06	910262	972546	693788	620904	352863	677704	475237	728379	542041	465195	523795	622735
4.18_186.0560m/z	186.056	4.1801	neg	3-amino-2-naphthoic acid	34509	Unclassified	Unclassified	Unclassified			58.2	92.5	M-H	C11H9NO2	-0.152122	149.353	137.09	160.727	133.161	147.29	9223.41	761.816	2126.43	3187.22	1782.21	1455.16	417.461	2501.51	5136.8	227.129	583.552
0.71_146.1057n	147.113	0.710867	pos	L-Lysine	25	Organic acids and derivatives	Carboxylic acids and derivatives	Amino acids, peptides, and analogues	**	C00047	57.9	95.2	M+H, M+Na, M+H-H2O	C6H14N2O2	0.855784	406302	407620	401908	428447	417576	116226	568050	227073	136104	205799	434127	432573	601244	328235	504499	210552
0.71_156.0769m/z	156.077	0.710867	pos	L-Histidine	21	Organic acids and derivatives	Carboxylic acids and derivatives	Amino acids, peptides, and analogues	**	C00135	57.9	97.9	M+H	C6H9N3O2	1.20692	146390	151220	142521	151158	138575	47346.8	116460	40421.8	45888.6	77556.5	130026	125488	103171	90640.5	44212.4	69379
0.79_175.0959n	176.103	0.791433	pos	Citrulline	16	Organic acids and derivatives	Carboxylic acids and derivatives	Amino acids, peptides, and analogues	**	C00327	57.9	95.2	M+H, M+K, M+Na	C6H13N3O3	1.38634	62251	61163.4	59843.8	57450	61632	27802	28397.7	41425.7	23342.8	38465.3	8472.11	9296.93	46988.6	14384.5	7327.64	7848.82
15.41_414.3717n	437.361	15.4128	pos	MG(0:0/22:0/0:0)	HMDB0011551	Lipids and lipid-like molecules	Glycerolipids	Monoradylglycerols	*		57.8	95.1	M+NH4, M+Na, M+H	C25H50O4	1.8762	156.811	86.8611	118.065	131.323	138.245	82.0558	120.085	729.742	157.017	162.941	8395.12	96.0037	2586.3	599.773	18250.8	746.369
1.36_283.0922n	284.099	1.36257	pos	Guanosine	87	Nucleosides, nucleotides, and analogues	Purine nucleosides	Unclassified	**	C00387	57.7	95.9	M+H, M+Na, M+K	C10H13N5O5	1.78857	133156	124338	122388	122661	128510	5232.33	77037.7	6113.46	2393.9	49832.2	192350	141630	31211.9	63260.7	138711	230890
3.47_311.1236n	312.131	3.4666	pos	N2,N2-Dimethylguanosine	HMDB0004824	Nucleosides, nucleotides, and analogues	Purine nucleosides	Unclassified	***		57.7	95.3	M+H, M+K, M+Na	C12H17N5O5	2.0348	24753.6	25429.1	28697.1	32579.7	29479.2	506.851	2705.35	1069.42	751.069	2274.07	3456.97	5927.62	1056.3	2699.83	1462.16	3814.09
9.23_353.2334m/z	353.233	9.2306	neg	8,8a-Deoxyoleandolide	LMPK04000030	Lipids and lipid-like molecules	Polyketides	Macrolides and lactone polyketides	**	C11989	57.6	94.8	M-H2O-H	C20H36O6	0.114748	8396.35	8077.23	8402.16	8956.49	8705.85	868.989	7416.35	1420.24	2430.62	6855.78	1202.74	3030.9	45906.7	4046.26	6635.7	279.726
0.71_132.0901n	133.097	0.710867	pos	D-Ornithine	6910	Organic acids and derivatives	Carboxylic acids and derivatives	Amino acids, peptides, and analogues	**	C00515	57.5	94.3	M+H, M+Na, M+H-H2O	C5H12N2O2	1.30538	95014.4	97436.6	96312.2	103381	98173.2	30269.8	9431.98	39219.7	36189.8	27593.4	5301.88	6302.84	13762	17869.2	5963.02	4993.85
0.83_116.0710m/z	116.071	0.829667	pos	L-Proline	29	Organic acids and derivatives	Carboxylic acids and derivatives	Amino acids, peptides, and analogues	**	C00148	57.4	96.2	M+H	C5H9NO2	3.07158	974717	970060	965550	959965	969951	103611	487148	157013	98498.2	226690	515343	496143	400681	304388	261486	288751
11.12_566.3462m/z	566.346	11.1189	neg	PC(18:1(11Z)/0:0)	LMGP01050138	Lipids and lipid-like molecules	Glycerophospholipids	Glycerophosphocholines	**	C04230	57.4	87.8	M+FA-H	C26H52NO7P	-0.260815	489637	485384	414888	437123	424265	199666	156760	172131	62234	205758	176034	227930	117231	90214	171873	125092
1.19_612.1527n	613.16	1.1916	pos	Oxidized glutathione	HMDB0003337	Organic acids and derivatives	Carboxylic acids and derivatives	Amino acids, peptides, and analogues	***	C00127	57.3	93.5	M+H, M+Na	C20H32N6O12S2	1.24502	2.61828e+06	2.62539e+06	2.30802e+06	2.60043e+06	3.2226e+06	1.74864e+06	922755	746874	1.78639e+06	1.09255e+06	1.15087e+06	1.03881e+06	474193	1.73691e+06	304645	1.21745e+06
10.44_477.2862n	478.294	10.4438	pos	LysoPE(18:2(9Z,12Z)/0:0)	HMDB0011507	Lipids and lipid-like molecules	Glycerophospholipids	Glycerophosphoethanolamines	***		57.3	91.5	M+H, M+Na	C23H44NO7P	1.46727	11953.2	11522	12767	12153	12898.7	37799	19272.1	26193.9	19251	25850.9	20435.2	21081.5	11063.1	10908.7	10659.1	17028.3
0.77_129.0427n	147.077	0.773167	pos	(R)-(+)-2-Pyrrolidone-5-carboxylic acid	63632	Unclassified	Unclassified	Unclassified			57.2	93.4	M+NH4, M+Na, M+H	C5H7NO3	1.12559	320889	332626	321087	322212	331046	148761	508997	170516	136204	529998	800656	549592	313557	266200	101956	463082
8.00_351.2176m/z	351.218	7.9983	neg	δ-12-PGD2	36165	Unclassified	Unclassified	Unclassified			57.2	90.1	M-H	C20H32O5	-0.139829	28140	31465.5	30947.2	27820.2	28572.9	123.909	178.449	517.58	202.582	12755.9	4009.94	2478.65	6781.64	12061.3	8385.79	4006.26
11.11_479.3018n	480.309	11.1054	pos	PE(18:1(9Z)/0:0)	40778	Lipids and lipid-like molecules	Glycerophospholipids	Glycerophosphoethanolamines			57.1	90	M+H, M+Na	C23H46NO7P	1.35183	92771.6	100514	88595.5	86768.1	90549.5	195595	93624.5	101077	86489.6	88920.2	82454.4	102457	47732.6	54294	54358.3	65727.8
7.72_352.2250n	351.218	7.7241	neg	8-iso-PGE2	36377	Lipids and lipid-like molecules	Fatty Acyls	Eicosanoids	*		57.1	89.2	M-H2O-H, M-H	C20H32O5	-0.050584	131941	129717	125131	132665	143808	1061.15	1755.89	17795.3	1760.2	139110	5655.2	1498.4	69774.6	162742	60231.4	43027.3
0.69_126.1028m/z	126.103	0.690133	pos	1-Methylhistamine	5854	Organic nitrogen compounds	Organonitrogen compounds	Amines	**	C05127	57	89	M+H	C6H11N3	1.9902	11764.5	11457.5	11638.1	13006.3	12447.4	2467.8	11095.1	3334.61	3158.95	5718.39	21169.3	22967.8	1145.95	9296.98	2089.02	20626.4
10.42_311.2220m/z	311.222	10.4193	pos	trans-EKODE-(E)-Ib	35761	Unclassified	Unclassified	Unclassified			57	89.8	M+H	C18H30O4	1.00932	12586.4	12523.9	11544.3	11376.1	14074.6	969.904	1055.05	1187.66	910.761	1129.49	990.12	711.231	848.32	1128.51	816.726	1010.22
4.10_191.0620n	192.069	4.09907	pos	N-Acetyl-DL-methionine	62466	Unclassified	Unclassified	Unclassified			57	93.6	M+H, M+Na, M+H-H2O	C7H13NO3S	1.80266	5754.87	6140.82	6832.49	8676.91	5813.85	6727.83	8534	7972.7	7039.17	12548.7	10111.3	7651.08	7483.65	9672.01	5340.99	5491.87
7.89_336.2304n	337.238	7.89275	pos	PGF2alpha-1,9-lactone	LMFA03010196	Lipids and lipid-like molecules	Fatty Acyls	Eicosanoids			57	89.9	M+H-H2O, M+H	C20H32O4	0.986428	3932.26	3641.54	3555.74	4122.72	3640.94	250.531	186.318	602.817	279.314	13950.1	1362.4	368.213	3894.75	15348.5	2011.82	2729.09
0.83_160.0615m/z	160.061	0.82665	neg	L-2-Aminoadipic acid	3271	Organic acids and derivatives	Carboxylic acids and derivatives	Amino acids, peptides, and analogues	**	C00956	56.9	87.6	M-H	C6H11NO4	-0.310565	25848	26855.9	27746.4	29006.7	30307	259.215	2229.2	924.061	989.473	1378.27	6452.3	12126.9	1301.92	2227.02	3143.75	4996.66
11.85_568.3618m/z	568.362	11.8517	neg	LysoPC(18:0/0:0)	HMDB0010384	Lipids and lipid-like molecules	Glycerophospholipids	Glycerophosphocholines	**	C04230	56.9	85.6	M+FA-H	C26H54NO7P	-0.362515	792393	843996	721816	729549	771808	630209	298377	292148	200367	280380	216573	345662	345497	320296	371993	259043
9.70_311.2229m/z	311.223	9.69872	neg	(±)9-HpODE	64785	Unclassified	Unclassified	Unclassified			56.9	88.4	M-H	C18H32O4	0.379927	36697.1	38216.8	36664.6	35635.1	39622.9	3067.68	1905.83	2989.75	3112.15	4255.95	2792.97	2343.22	2443.01	4348.83	3716.98	2940.21
0.79_162.1126m/z	162.113	0.791433	pos	L-Carnitine	34532	Organic nitrogen compounds	Organonitrogen compounds	Quaternary ammonium salts	**	C00318	56.7	92.8	M+H	C7H15NO3	0.891973	932351	961254	992366	1.0051e+06	1.07314e+06	670816	501625	535558	325867	650864	763306	765881	339518	459503	212408	541048
1.18_151.0260m/z	151.026	1.1804	neg	Xanthine	HMDB0000292	Organoheterocyclic compounds	Imidazopyrimidines	Purines and purine derivatives	***	C00385	56.7	90	M-H	C5H4N4O2	-0.678752	336371	410207	601838	608571	468900	16147.5	265157	144236	72034.1	181262	276632	279629	230612	238505	195362	291815
10.60_313.2376m/z	313.238	10.5968	pos	9,10-epoxy-13-hydroxy-11-octadecenoic acid	74806	Lipids and lipid-like molecules	Fatty Acyls	Octadecanoids			56.7	89.8	M+H	C18H32O4	0.999773	1002.31	1121.53	1079.6	1215.9	1246.34	601.195	821.067	736.812	1030.66	1537.05	771.108	920.605	531.355	955.336	5709.8	807.743
0.75_140.0118m/z	140.012	0.748083	neg	O-Phosphorylethanolamine	54	Organic acids and derivatives	Organic phosphoric acids and derivatives	Phosphate esters	**	C00346	56.6	86.3	M-H	C2H8NO4P	-0.0207585	46958	45808.9	44385.7	48026.2	53416.1	4365.55	42472.9	18387.7	6711.65	30665.1	54820.7	38291.4	32796.6	44697.8	15422.7	55984.4
3.96_784.1499m/z	784.15	3.95578	neg	FAD	HMDB0001248	Nucleosides, nucleotides, and analogues	Flavin nucleotides	Unclassified	***	C00016	56.6	85.6	M-H	C27H33N9O15P2	0.095324	140736	128902	131733	131252	118689	11471.4	97563.3	30490.4	16356.3	48706.7	119021	113395	80023.6	102900	97971.5	71390.8
10.73_540.3307m/z	540.331	10.7309	neg	PC(16:0/0:0)[rac]	LMGP01050113	Lipids and lipid-like molecules	Glycerophospholipids	Glycerophosphocholines			56.5	83.4	M+FA-H	C24H50NO7P	-0.0173979	197948	196803	173624	186991	178880	105777	101728	90284.3	52007.6	131304	97785.6	116383	126471	98995.7	89891.4	124939
11.17_526.3515m/z	526.351	11.1676	neg	PC(O-16:0/0:0)	LMGP01060010	Lipids and lipid-like molecules	Glycerophospholipids	Glycerophosphocholines			56.5	84.7	M+FA-H	C24H52NO6P	0.0523732	100813	95625	97298.7	99969.1	98229.5	30527.6	15825.1	18441.2	12676.2	16721.7	12037.2	18966.1	9889.74	9079.11	15937.7	8367.41
3.87_204.0899n	203.083	3.87258	neg	L-Tryptophan	33	Organoheterocyclic compounds	Indoles and derivatives	Indolyl carboxylic acids and derivatives	**	C00078	56.5	85.1	M-H, 2M-H	C11H12N2O2	0.124558	10034.3	7161.96	7163.81	8094.98	7755.01	3190.51	7180.99	1934.66	2641.4	1891.01	7200.45	7418.85	6958.38	2242.31	5806.31	4482.42
1.30_267.0971n	268.104	1.29677	pos	Adenosine	86	Nucleosides, nucleotides, and analogues	Purine nucleosides	Unclassified	**	C00212	56.4	95.6	M+H, M+Na	C10H13N5O4	1.34915	285183	259817	281270	274780	297126	7444.53	142429	27528.7	29437.4	102202	196864	150066	48333.5	72465.5	116750	114778
3.10_219.1106n	218.103	3.101	neg	Pantothenic acid	HMDB0000210	Organic oxygen compounds	Organooxygen compounds	Alcohols and polyols	***	C00864	56.4	83.9	M-H, 2M-H	C9H17NO5	-0.303863	221054	214946	238596	222591	250120	599.784	43395.1	5677.66	508.545	17428	64238.7	95397.7	32323.1	32858.3	44817.8	52433.8
7.85_354.2407n	353.233	7.85035	neg	PGE1	416	Lipids and lipid-like molecules	Fatty Acyls	Eicosanoids	*	C04741	56.4	87.8	M-H2O-H, M-H	C20H34O5	0.156066	9708.66	11588.6	11238.5	11705.8	11874.2	123.267	213.17	1477.23	365.152	41363.5	2764.68	631.084	12393	43070.1	7395.13	6114.4
8.52_319.2271m/z	319.227	8.52388	pos	Cyathin A3	67410	Unclassified	Unclassified	Unclassified			56.4	86.9	M+H	C20H30O3	0.966221	1406.45	1372.21	1355.34	1231.94	1332.56	664.21	1587.97	1023.4	1053.13	4619.17	2547.92	4559.3	15764.1	2834.87	2056.66	694.763
0.83_309.1063n	332.096	0.829667	pos	N-Acetylneuraminic Acid	24101	Organic oxygen compounds	Organooxygen compounds	Carbohydrates and carbohydrate conjugates	*	C19910	56.3	85.6	M+H, M+Na, M+H-H2O	C11H19NO9	1.02513	262114	284754	290595	291979	299104	43467.2	236946	67841.8	27645.1	56641.8	684431	502503	75956.2	88692.2	52559.1	138747
10.87_453.2862n	454.293	10.8721	pos	PE(16:0/0:0)	40776	Lipids and lipid-like molecules	Glycerophospholipids	Glycerophosphoethanolamines	*		56.3	85.2	M+H, M+Na, M+H-H2O	C21H44NO7P	1.34781	123805	145942	105749	107463	125260	138121	81813.3	147460	97026.9	99063.3	52093.9	59686	47147.1	65382.4	46944.7	38792.4
10.07_311.2228m/z	311.223	10.0671	neg	(±)13-HpODE	64784	Unclassified	Unclassified	Unclassified			56.2	85.1	M-H	C18H32O4	0.148261	49986.3	48990.7	45509.1	45322.7	54002.7	5620.14	2798.82	5717.97	7290.49	6609.23	3541.17	2341.46	4932.4	6950.62	4637.75	2490.53
3.39_383.1084n	384.116	3.39045	pos	Succinyladenosine	HMDB0000912	Nucleosides, nucleotides, and analogues	Purine nucleosides	Unclassified	***		56.2	88.4	M+H, M+Na	C14H17N5O8	1.80253	99000.6	92227.7	95294.4	114104	116673	476.595	7486.1	1239.4	874.709	7203.15	29011.9	12356.4	3539.52	8179.5	4814.27	11819.2
4.75_187.1211n	210.11	4.7531	pos	(E)-2-Butenyl-4-methyl-threonine	69263	Unclassified	Unclassified	Unclassified			56.2	85.4	M+Na, M+H	C9H17NO3	1.56057	152288	178786	184564	155452	204973	164537	145836	159474	162228	155597	146279	167175	108903	184464	83887.9	175196
7.52_336.2305n	319.227	7.51668	pos	PGF2α 1,11-lactone	36142	Unclassified	Unclassified	Unclassified			56.2	86.3	M+H-H2O, M+H	C20H32O4	1.17255	5487	5270.69	5280.86	5525.59	5698.36	1122.38	4814.65	8920.96	1914.71	67201.3	8141.23	4893.56	25176.4	23072.3	18171.2	12367.8
8.03_352.2252n	375.215	8.03472	pos	5-trans Prostaglandin D2	45419	Unclassified	Unclassified	Unclassified			56.2	85.3	M+H-H2O, M+NH4, M+Na	C20H32O5	0.593706	30024.5	31665	32154.9	28433.2	29483.1	418.709	371.111	698.716	799.823	13502.9	3956.23	2589.39	5690.92	10197.2	6041.14	4095.36
0.91_203.1159n	204.123	0.911433	pos	L-Acetylcarnitine	HMDB0000201	Lipids and lipid-like molecules	Fatty Acyls	Fatty acid esters	***	C02571	56.1	82.3	M+H-H2O, M+H	C9H17NO4	0.529046	964845	976836	987652	962736	966647	663956	963758	436568	374905	625362	1.96783e+06	1.43525e+06	312110	961344	451397	1.03565e+06
9.52_298.2745m/z	298.274	9.5233	pos	Cassine	68143	Unclassified	Unclassified	Unclassified			56.1	86.1	M+H	C18H35NO2	1.33966	1067.93	1171.69	1116.76	1122.93	1067.65	15197.9	11094.2	15122.1	10702.9	15706	11925.2	15223.7	20518.1	9052.69	5815.9	4197.19
0.71_130.0865m/z	130.086	0.710867	pos	D-Pipecolic acid	58337	Organic acids and derivatives	Carboxylic acids and derivatives	Amino acids, peptides, and analogues	*		56	88.4	M+H	C6H11NO2	1.58057	141135	141646	144238	153436	149945	42154.4	205176	78802.6	50466	73318.1	160937	161096	216926	117765	183660	76219.5
0.87_579.0272m/z	579.027	0.868767	neg	Uridine 5'-diphosphoglucuronic acid	5884	Organoheterocyclic compounds	Lactones	Gamma butyrolactones	**	C00167	56	84.6	M-H	C15H22N2O18P2	0.355084	455614	478673	455950	476325	460840	37799	11100.8	8461.78	14598	54776.8	59784.9	8082.42	2519.79	38923.1	556.593	16647.8
11.40_552.3672m/z	552.367	11.4014	neg	LysoPC(P-18:0/0:0)	HMDB0013122	Lipids and lipid-like molecules	Glycerophospholipids	Glycerophosphocholines	**	C04230	56	83.9	M+FA-H	C26H54NO6P	0.270321	72484.2	64937.4	64600	72265.5	65265.8	17765.5	13804	12195.5	6703.44	11027.6	15890.9	18831	14029.3	7615.9	14256.5	5935.26
1.30_123.0444m/z	123.044	1.29677	pos	4-Hydroxybenzaldehyde	62451	Organic oxygen compounds	Organooxygen compounds	Carbonyl compounds	**	C00633	55.9	83.9	M+H	C7H6O2	2.89536	80350.5	72920.9	83471.4	86257.6	87600.7	15349.1	68723.4	20218.9	14714.4	31940.8	73149.5	76093.9	68491.2	53911.7	48276.3	38708.2
10.04_512.2993m/z	512.299	10.0424	neg	LysoPC(14:0/0:0)	HMDB0010379	Lipids and lipid-like molecules	Glycerophospholipids	Glycerophosphocholines	*		55.9	80.5	M+FA-H	C22H46NO7P	-0.255833	117960	116328	110411	102970	123048	10784.1	9029.71	9895.74	1673.8	15483.2	4887.37	9968.9	10506	6878.25	13814.5	6583.5
7.61_239.0924m/z	239.092	7.61343	neg	CMPF	45041	Lipids and lipid-like molecules	Fatty Acyls	Fatty acids and conjugates			55.9	81.4	M-H	C12H16O5	-0.27311	245.968	140.887	267.089	202.963	287.573	6312.17	72248	114155	46387.7	85680.1	4761.42	52305.3	1857.18	26579.1	28562.3	7859.6
0.79_119.0587n	120.066	0.791433	pos	AMINOHYDROXYBUTYRIC ACID	44197	Unclassified	Unclassified	Unclassified			55.8	86.2	M+H-H2O, M+H	C4H9NO3	4.0506	102912	100807	103019	105563	118182	25965.8	69254.4	29780.1	20269.4	42454.2	70287	63037	68136	42011.3	26994.7	37476.4
1.33_116.0109n	115.004	1.33367	neg	Maleic acid	HMDB0000176	Organic acids and derivatives	Carboxylic acids and derivatives	Dicarboxylic acids and derivatives	***	C01384	55.8	80.5	M-H, 2M-H	C4H4O4	-0.655731	24383.3	27624.7	26825.1	27944	27578.4	2175.7	9625.26	3560.14	2313.37	7900.94	12287.2	7026.82	4269.45	6719.33	5501.21	7604.66
10.69_323.2227m/z	323.223	10.6887	neg	alpha-Linolenic acid	LMFA01030152	Lipids and lipid-like molecules	Fatty Acyls	Lineolic acids and derivatives	**	C06427	55.8	84.3	M+FA-H	C18H30O2	-0.228285	2814	2860.89	2631.89	2597.83	2345.68	1558.96	2087.23	1395.95	2437.67	5720.19	3474.58	1946.9	2414.46	1394.07	8458.7	1524.42
11.04_608.3572m/z	608.357	11.0406	neg	PGPC	45374	Lipids and lipid-like molecules	Glycerophospholipids	Oxidized glycerophospholipids			55.8	81.3	M-H	C29H56NO10P	0.43685	191823	167113	155825	169700	151316	2002.89	682.517	1101.04	3410.15	1609.27	842.437	520.203	731.79	840.451	5.88962e-06	167.605
3.96_237.1236m/z	237.124	3.96323	pos	ALANYL-dl-PHENYLALANINE	44266	Unclassified	Unclassified	Unclassified			55.8	87.1	M+H	C12H16N2O3	1.09544	488.975	684.979	324.552	557.29	655.91	705.844	401.017	36.1517	721.818	274.882	1476.72	942.466	2005.87	1630.53	1249.8	602.931
0.83_426.0226m/z	426.023	0.82665	neg	ADP	34522	Nucleosides, nucleotides, and analogues	Purine nucleotides	Purine ribonucleotides	**	C00008	55.7	84.7	M-H	C10H15N5O10P2	0.984884	163812	177387	177632	189455	188731	154708	27940.2	32246.6	125910	58396	58577	38582.4	68282.5	84964.1	129151	58606.7
1.86_297.1080n	320.097	1.8562	pos	Nelarabine	85183	Nucleosides, nucleotides, and analogues	Purine nucleosides	Unclassified			55.7	85.5	M+Na, M+K, M+H	C11H15N5O5	2.39267	31821.5	35428.7	39688.5	44124.7	38137.6	1944.24	17505.8	17537.2	4919.82	15946.3	17541.4	30591.3	11468.6	18617.2	9066.41	23479.8
1.36_311.1243m/z	311.124	1.36257	pos	Tyrosyl-Glutamate	HMDB0029104	Organic acids and derivatives	Carboxylic acids and derivatives	Amino acids, peptides, and analogues	*		55.6	85.3	M+H	C14H18N2O6	1.72855	3079.49	2760.33	3196.2	2954.43	3070.2	5522.59	3854.9	1543.17	2679.31	2968.96	3814.18	2989.69	5782.98	4362.99	3359.24	2512.96
10.63_519.3332n	520.341	10.6311	pos	LysoPC(18:2(9Z,12Z))	HMDB0010386	Lipids and lipid-like molecules	Glycerophospholipids	Glycerophosphocholines	***		55.6	83	M+H, M+Na	C26H50NO7P	1.4612	86719.4	101123	89224.3	108768	113634	364746	162734	175657	86922.1	141161	98724.7	136273	76989	71375.7	56184.8	104888
3.90_146.0603m/z	146.06	3.89823	pos	4-formyl Indole	96392	Unclassified	Unclassified	Unclassified			55.6	82	M+H	C9H7NO	1.95028	18945.1	18731.7	20142.3	22831.7	20604	5029.41	10400.9	3600.65	3993.67	3899.76	12372.9	13324	7167.46	4025.47	6707.71	6952.17
7.49_353.2333m/z	353.233	7.48602	neg	15(R)-PGF2α	36116	Unclassified	Unclassified	Unclassified			55.6	81.7	M-H	C20H34O5	-0.0356341	10975.4	12153	12071.6	13182.4	11181.9	2962.99	10015.4	20946.1	5784.1	150135	19393.4	11745.4	67726.8	63318.7	57321.1	32920.3
9.95_335.2229m/z	335.223	9.95472	neg	Sterculynic acid	LMFA01140016	Lipids and lipid-like molecules	Fatty Acyls	Fatty Acids and Conjugates			55.6	81.4	M+FA-H	C19H30O2	0.316467	3139.61	3797.54	3748.16	3816.26	3526.05	3420.12	3450.68	1864.31	7463.73	5221.36	791.488	767.628	41395	13131.1	2769.55	990.821
0.67_111.0800n	112.087	0.669317	pos	Histamine	68	Organic nitrogen compounds	Organonitrogen compounds	Amines	**	C00388	55.5	86.9	M+H, M+Na	C5H9N3	3.44958	25806.1	26187.7	25375.8	27113.2	26896.8	3805.01	9659.59	12841.3	2326.93	3288.43	5918.29	9598.99	16533.1	6387.4	47015.1	26989.5
11.78_481.3165n	482.324	11.7828	pos	LysoPE(18:0/0:0)	HMDB0011130	Lipids and lipid-like molecules	Glycerophospholipids	Glycerophosphoethanolamines	***		55.5	81.2	M+H, M+Na	C23H48NO7P	-0.784739	416307	444990	478931	433154	414667	176111	356286	303689	123531	344603	233754	245622	256004	225320	309141	127653
12.89_304.2401n	303.233	12.8945	neg	Arachidonic acid	HMDB0001043	Lipids and lipid-like molecules	Fatty Acyls	Fatty acids and conjugates	***	C00219	55.5	80.4	M-H, M+FA-H, 2M-H	C20H32O2	-0.534294	3428.86	4447	4385.42	4928.93	4546.89	105539	1.0788e+06	503830	113782	581664	717868	685490	1.02754e+06	647966	1.14e+06	411736
14.88_282.2794m/z	282.279	14.8782	pos	Oleamide	4115	Lipids and lipid-like molecules	Fatty Acyls	Fatty amides	*	C19670	55.5	81.7	M+H	C18H35NO	1.03408	2.75696e+06	2.84265e+06	2.88313e+06	3.027e+06	2.99421e+06	2.93755e+06	2.68778e+06	3.17938e+06	3.21327e+06	3.07842e+06	2.94183e+06	2.71017e+06	2.27763e+06	2.93916e+06	2.04865e+06	2.93714e+06
0.71_188.1760m/z	188.176	0.710867	pos	N1-Acetylspermidine	3323	Organic acids and derivatives	Carboximidic acids and derivatives	Carboximidic acids	*	C00612	55.4	88.8	M+H	C9H21N3O	1.21752	92125	92917	88295.3	95797.4	99010.6	1487.2	19014.3	16803.9	3016.27	22456.8	49005.8	76164.4	5774.64	41727.7	13242.2	32185.6
1.27_180.0666m/z	180.067	1.26567	neg	L-Tyrosine	34	Organic acids and derivatives	Carboxylic acids and derivatives	Amino acids, peptides, and analogues	**	C00082	55.4	79.3	M-H	C9H11NO3	-0.141027	15940.9	17793.1	17780.8	17496.5	18319.9	5044.59	19490.4	6198.26	5120.57	8618.95	16756	21033	25029.6	13935.3	20136.2	9783.29
11.28_277.1802m/z	277.18	11.283	pos	Tanacetol A	HMDB0035722	Lipids and lipid-like molecules	Prenol lipids	Sesquiterpenoids	*		55.4	82.7	M+H-H2O	C17H26O4	1.37429	16492.2	15951.6	16587.9	15425.9	16551	20785.5	14605.1	18814	19006.2	16382.3	18916.1	15906	13903.5	17779.8	10337.8	16774.7
3.61_272.1726m/z	272.173	3.60977	pos	Prolyl-Arginine	HMDB0029011	Organic acids and derivatives	Carboxylic acids and derivatives	Amino acids, peptides, and analogues	*		55.4	82.8	M+H	C11H21N5O3	3.27263	492.253	351.769	343.62	662.182	467.488	43.8342	818.647	39.6208	288.227	259.54	1270.07	1219.69	1862.45	945.185	40887.4	14840.1
9.38_293.1758m/z	293.176	9.38468	neg	7,10-hexadecadiynoic acid	LMFA01030492	Lipids and lipid-like molecules	Fatty Acyls	Fatty Acids and Conjugates			55.4	79.8	M+FA-H	C16H24O2	0.0397105	122997	122587	114778	130137	136450	130116	90709.9	123810	143847	127378	100847	114450	108526	133598	131702	104043
0.77_183.0663n	184.074	0.773167	pos	Phosphocholine	3318	Organic nitrogen compounds	Organonitrogen compounds	Quaternary ammonium salts	**	C00588	55.3	83.3	M+H, M+K, M+Na	C5H14NO4P	1.18619	1.63846e+06	1.75036e+06	1.73272e+06	1.74915e+06	1.66409e+06	29853.1	682835	191640	79961.8	443714	742908	619399	324293	444210	91520	386850
0.81_131.0697n	132.077	0.809917	pos	Creatine	7	Organic acids and derivatives	Carboxylic acids and derivatives	Amino acids, peptides, and analogues	**	C00300	55.3	83.1	M+H, M+K, M+Na, M+H-H2O	C4H9N3O2	1.35303	4.80076e+06	4.72074e+06	4.87185e+06	4.99038e+06	4.91898e+06	762776	541894	282479	431761	573688	738682	614257	268249	582297	237541	969152
0.91_118.0866m/z	118.087	0.911433	pos	L-Valine	35	Organic acids and derivatives	Carboxylic acids and derivatives	Amino acids, peptides, and analogues	**	C00183	55.3	85.4	M+H	C5H11NO2	2.95768	721338	753727	725587	726167	725685	386720	422606	269799	239960	318536	442325	438686	349513	373708	232178	245519
0.91_306.0766m/z	306.077	0.90975	neg	Glutathione	44	Organic acids and derivatives	Carboxylic acids and derivatives	Amino acids, peptides, and analogues	**	C00051	55.3	80.9	M-H	C10H17N3O6S	0.216666	164695	145733	140605	147627	171030	169754	19086.3	240.535	25869.7	261.1	265136	380048	950.084	200354	5.88962e-06	539026
10.22_311.2228m/z	311.223	10.2244	neg	9(S)-HpODE	36019	Lipids and lipid-like molecules	Fatty Acyls	Lineolic acids and derivatives	**	C14827	55.3	80.1	M-H	C18H32O4	0.182427	70736.3	76690.7	71692.1	73991.6	79109.9	7934.9	3287.83	5853.12	11314.1	8586.71	5183.27	4073.22	5882.33	8649.18	7374.46	4231.66
10.30_538.3151m/z	538.315	10.3027	neg	PC(16:1(9Z)/0:0)	LMGP01050022	Lipids and lipid-like molecules	Glycerophospholipids	Glycerophosphocholines	**	C04230	55.3	78.1	M+FA-H	C24H48NO7P	0.0522582	191971	211920	188528	203826	190373	19848.8	27638.5	29197.9	5388.9	41385.1	29239.4	36851.5	26273.9	22162.5	34471.6	26321.5
0.79_147.0531n	146.046	0.78745	neg	L-Glutamate	19	Organic acids and derivatives	Carboxylic acids and derivatives	Amino acids, peptides, and analogues	**	C00025	55.2	82.3	M-H2O-H, M-H	C5H9NO4	-0.245261	305950	326419	321190	343196	327308	152197	328249	186190	135152	326360	412152	438312	287713	341471	249208	468681
0.91_188.1164n	189.124	0.911433	pos	Nε-Acetyl-L-lysine	63103	Organic acids and derivatives	Carboxylic acids and derivatives	Amino acids, peptides, and analogues	**	C02727	55.2	81.5	M+H, M+Na	C8H16N2O3	1.71409	11273.2	11540.2	12070.6	11920.7	12975.8	3358.94	30062	8601.39	2758.07	8534.27	25553.6	22485.5	30606	13977.4	16726.3	6049.71
10.46_564.3307m/z	564.331	10.4561	neg	LysoPC(0:0/18:2(9Z,12Z))	HMDB0061700	Lipids and lipid-like molecules	Glycerophospholipids	Glycerophosphocholines	*		55.2	77.2	M+FA-H	C26H50NO7P	-0.0602009	19148.5	19986.5	17420.4	21189.4	16173.3	63730.7	41940.9	31962.6	26823.4	49762.9	72975.6	82391.2	45607	27783.8	28542.7	27821.1
10.53_276.1729n	277.18	10.5304	pos	Cyclandelate	HMDB0015586	Benzenoids	Benzene and substituted derivatives	Unclassified			55.2	80.7	M+H-H2O, M+H	C17H24O3	1.23758	90637.5	90791.4	72521.7	85620.1	83046.9	104391	76195.9	81435.1	95949.1	75914.7	76112.5	64731.9	64593.8	91205.7	45364.5	70357.3
10.90_747.5660m/z	747.566	10.9003	neg	SM(d17:1/17:0)	LMSP03010043	Lipids and lipid-like molecules	Sphingolipids	Phosphosphingolipids			55.2	85	M+FA-H	C39H79N2O6P	0.271145	3.21427e+06	3.18346e+06	2.2373e+06	2.88677e+06	1.97205e+06	331928	3.95613e+06	4.56909e+06	5.21909e+06	4.25171e+06	3.79843e+06	3.29378e+06	2.77208e+06	2.73535e+06	168282	3.717e+06
12.28_826.5600m/z	826.56	12.2763	neg	PE-NMe(18:0/20:4(5Z,8Z,11Z,14Z))	HMDB0113098	Lipids and lipid-like molecules	Glycerophospholipids	Glycerophosphoethanolamines			55.2	86.9	M+FA-H	C44H80NO8P	-0.447352	2.18969e+06	1.77435e+06	2.43162e+06	1.84011e+06	3.26484e+06	106352	22281.1	9941.11	8971.85	31515.3	295388	710739	2.37283e+06	2.75773e+06	473494	198808
6.30_352.2253n	353.233	6.30008	pos	13,14-Dihydro-15-keto-PGE2	2311	Lipids and lipid-like molecules	Fatty Acyls	Eicosanoids	*	C04671	55.2	80.3	M+H-H2O, M+H	C20H32O5	0.984938	20498.2	20147.7	19398.4	23556.5	20010.5	343.191	902.206	1066.02	957.987	3431.72	1971.16	1143.95	29494.1	5791.06	36970.7	2506.1
0.77_134.0449m/z	134.045	0.773167	pos	L-Aspartic Acid	15	Organic acids and derivatives	Carboxylic acids and derivatives	Amino acids, peptides, and analogues	**	C00049	55	85.3	M+H	C4H7NO4	1.23263	172274	168801	173086	171851	177246	29541.9	78501.7	43880.5	38116.3	77584.6	67794	50874.9	63656.4	52047.1	27102.7	75113.5
8.84_334.2149n	317.212	8.84062	pos	bicyclo-PGE2	HMDB0060054	Lipids and lipid-like molecules	Fatty Acyls	Eicosanoids	*		55	82	M+H-H2O, M+H	C20H30O4	1.31887	2974.74	2938.85	3110.55	3415.64	3656.04	569.547	579.733	428.464	947.21	3695.2	1222.21	1117.13	9660.59	2486.32	3532.13	717.129
0.85_323.0286m/z	323.029	0.847483	neg	Uridine monophosphate (UMP)	3453	Unclassified	Unclassified	Unclassified			54.9	75.9	M-H	C9H13N2O9P	-0.00852935	297236	303686	296240	319919	312164	14961.9	11395.5	4787.13	30025.4	16884	18510.3	12300.4	7700.37	23542.9	4448.55	12639.5
0.89_276.0962n	277.103	0.8917	pos	Glutamylglutamic acid	HMDB0028818	Organic acids and derivatives	Carboxylic acids and derivatives	Amino acids, peptides, and analogues	***	C01425	54.9	79.3	M+H, M+Na	C10H16N2O7	1.68247	134964	143256	138940	141058	153273	16772.2	208990	158477	29780.7	172761	96738.7	57003.9	87862.5	50884.2	45779	91299.4
5.93_178.0509m/z	178.051	5.92622	neg	p-Acetaminobenzoic acid	2830	Unclassified	Unclassified	Unclassified			54.9	76.5	M-H	C9H9NO3	-0.282008	689.674	701.971	728.063	785.502	732.903	8839.1	2627.45	5798.26	11595.8	4349.4	1671.52	1999.37	3917.21	5710.4	2337.96	1587.18
10.32_299.2828n	300.29	10.3189	pos	L-threo-Sphingosine C-18	45278	Unclassified	Unclassified	Unclassified			54.8	79.6	M+H, M+Na	C18H37NO2	1.23812	87312.7	88804.3	81536.7	82503.7	89380.3	98752.5	79310.8	91043.3	99635.4	80140.6	82522.6	76272.5	70952.8	86940.8	54593.5	82666.4
10.61_309.2072m/z	309.207	10.6085	neg	16-F1-PhytoP	LMFA02030001	Lipids and lipid-like molecules	Fatty Acyls	Octadecanoids			54.8	77.6	M-H2O-H	C18H32O5	0.11688	126982	115553	108900	118958	112084	2903.2	3071.03	4370.79	2217.46	4824.78	2501.51	2245.26	3225.49	2682.94	5421.69	2954.5
10.95_279.2322m/z	279.232	10.9505	pos	Avenoleic acid	HMDB0029978	Lipids and lipid-like molecules	Fatty Acyls	Lineolic acids and derivatives	*		54.8	79.6	M+H-H2O	C18H32O3	1.18727	42053.2	41639.9	40327.4	42930.7	46498.5	14868.5	9099.35	11327	14713.2	25877.9	11708.6	9289.94	26502.4	26512.3	11301.6	10782.7
15.14_401.3419m/z	401.342	15.1445	pos	7a-Hydroxy-cholestene-3-one	HMDB0001993	Lipids and lipid-like molecules	Steroids and steroid derivatives	Cholestane steroids	***	C05455	54.8	79.5	M+H	C27H44O2	1.17191	1.549e+06	1.53225e+06	1.39014e+06	1.27051e+06	1.49271e+06	92086.7	11339.1	36211.2	151564	96709.5	10884.3	11922.8	20116	52997.3	3838.96	8114.72
5.12_239.0917m/z	239.092	5.12455	pos	3,4-dimethyl-5-carboxyethyl-2-furanacrylic acid	LMFA01150051	Lipids and lipid-like molecules	Fatty Acyls	Fatty Acids and Conjugates			54.8	77.3	M+H	C12H14O5	1.30815	1048.63	1011.85	630.383	872.03	956.391	2328.09	17677.1	16396.7	6461.59	13404.1	1286.19	6861.88	694.311	4122.7	2573.83	1827.19
6.30_393.2250m/z	393.225	6.30008	pos	6-Keto-prostaglandin F1a	HMDB0002886	Lipids and lipid-like molecules	Fatty Acyls	Eicosanoids	**	C05961	54.8	79.1	M+Na	C20H34O6	0.780623	11520.3	11636.3	10762.7	12907.9	10280	3.77686	7.73795	359.282	14.1732	1560.34	455.936	136.168	16965.6	2947.23	20738.2	1147.9
0.81_323.0518n	322.045	0.805983	neg	3'-CMP	HMDB0240312	Organic oxygen compounds	Organooxygen compounds	Carbohydrates and carbohydrate conjugates	***	C05822	54.7	79.6	M-H, M+FA-H	C9H14N3O8P	-0.0449421	67997.9	68306.8	70511	72769.6	77950.9	2889.74	20532.5	23104.8	5552.1	25935.8	50721.2	46394.1	16719.5	34278.6	18832.2	58628.3
10.97_566.3462m/z	566.346	10.9698	neg	PC(18:1(9Z)/0:0)	LMGP01050032	Lipids and lipid-like molecules	Glycerophospholipids	Glycerophosphocholines	*		54.7	75.1	M+FA-H	C26H52NO7P	-0.267344	129232	138375	142385	128208	122712	39322	52818.7	31896.2	23432.2	46747.7	69343	85343.1	57066.7	34720.9	40367.3	34179.8
8.03_317.2115m/z	317.211	8.03472	pos	15-deoxy-Δ12,14-Prostaglandin A2	45404	Unclassified	Unclassified	Unclassified			54.7	78.6	M+H	C20H28O3	1.09549	8855.85	8733.98	9107.25	8422.82	8588.04	137.58	160.478	242.243	231.486	4078.4	1001.1	639.749	1697.56	2980.61	1685.06	1184.77
9.68_295.2271m/z	295.227	9.67532	pos	9-OxoODE	35860	Lipids and lipid-like molecules	Fatty Acyls	Lineolic acids and derivatives	**	C14766	54.7	77.3	M+H	C18H30O3	1.20278	23493.3	21333.8	22049.3	21478.1	24001.4	2353.07	1998.02	2402.98	2454.11	2531.87	2449.28	2099.36	1924.68	2750	1818.24	2156.61
7.50_355.2489m/z	355.249	7.50395	neg	PGF1α	3503	Lipids and lipid-like molecules	Fatty Acyls	Eicosanoids	*	C06475	54.6	78.1	M-H	C20H36O5	-0.210152	628.965	693.37	648.691	703.431	575.554	106.351	1383.66	2642.35	487.301	41234.6	10218.2	5576.79	14206	15235.1	6577.28	6942.71
0.77_257.1032n	258.11	0.773167	pos	Glycerophosphocholine	370	Lipids and lipid-like molecules	Glycerophospholipids	Glycerophosphocholines	**	C00670	54.5	75.2	M+H, M+Na, M+K	C8H20NO6P	1.28792	4.48337e+06	4.45029e+06	4.55225e+06	4.6504e+06	4.88016e+06	79667.4	335103	225344	69274.9	111167	974849	896187	162035	182459	283767	274190
1.30_135.0688n	136.076	1.29677	pos	2-Phenylacetamide	3260	Benzenoids	Benzene and substituted derivatives	Phenylacetamides	**	C02505	54.5	84.3	M+H-H2O, M+H	C8H9NO	2.74349	258496	233906	270337	265090	278473	48738.6	219601	62636.6	47198.6	102410	234192	246982	219248	171621	158806	122685
10.60_564.3307m/z	564.331	10.5974	neg	PC(18:2(2E,4E)/0:0)	LMGP01050034	Lipids and lipid-like molecules	Glycerophospholipids	Glycerophosphocholines			54.5	73.5	M+FA-H	C26H50NO7P	-0.0231516	73511.7	64798.2	61938.7	66903.7	59881.1	350435	111304	140124	78105.5	126295	71784.6	104729	78741.7	51005.1	80396.7	86771.3
11.11_427.3667n	428.374	11.1054	pos	Stearoylcarnitine	HMDB0000848	Lipids and lipid-like molecules	Fatty Acyls	Fatty acid esters	***		54.5	79.4	M+H, M+Na	C25H49NO4	1.34399	67161.1	66363.3	68942.6	68956.7	73627.1	226456	92731.2	37727.9	108841	43380.8	247557	248302	41935.4	42622.7	31336.3	38921.9
11.15_521.3489n	522.356	11.1497	pos	PC(0:0/18:1(9Z))	LMGP01050082	Lipids and lipid-like molecules	Glycerophospholipids	Glycerophosphocholines	*		54.5	76.5	M+H, M+Na	C26H52NO7P	1.49744	786072	793177	749130	835940	835957	274798	267737	222324	115992	270627	305825	369337	219247	176848	193379	229028
4.29_212.0024m/z	212.002	4.28655	neg	Indoxylsulfuric acid	253	Organic acids and derivatives	Organic sulfuric acids and derivatives	Arylsulfates	*		54.5	75.5	M-H	C8H7NO4S	0.248668	78944.7	81575.6	70648.4	70631.5	78289.5	4796.64	3710.25	14726.3	1660.46	10764.9	851.66	3020.32	994.666	4797.84	10291.8	3457.74
5.83_335.2217m/z	335.222	5.83178	pos	(-)-Leucothol C	53657	Lipids and lipid-like molecules	Prenol lipids	Isoprenoids			54.5	75.8	M+H	C20H30O4	0.12795	188.831	139.646	227.949	176.859	211.645	269.782	2334.28	352.296	341.502	1305.1	240.846	324.839	7749.55	969.444	562.177	48.7177
0.71_173.1043m/z	173.104	0.705333	neg	L-Arginine	13	Organic acids and derivatives	Carboxylic acids and derivatives	Amino acids, peptides, and analogues	**	C00062	54.4	80.8	M-H	C6H14N4O2	-0.605591	2721.86	2968.5	3946.01	3342.03	2952.67	1451.07	25768.6	4027.94	2264.37	8437.09	23899	30251.9	24002.3	14122.2	20849.2	12131.7
0.71_227.1146m/z	227.115	0.710867	pos	Carnosine	38	Organic acids and derivatives	Peptidomimetics	Hybrid peptides	**	C00386	54.4	80	M+H	C9H14N4O3	3.14949	10778.3	10390.8	10326.3	10756.9	11464	4866.8	1065.76	818.886	5715.18	908.021	1234.71	1055.31	4340.71	1823.16	1523.13	773.216
0.85_347.0631n	346.056	0.847483	neg	Adenosine monophosphate	34478	Nucleosides, nucleotides, and analogues	Purine nucleotides	Purine ribonucleotides	**	C00020	54.4	77.6	M-H, 2M-H	C10H14N5O7P	0.0486786	313851	348974	312477	353028	324097	73432.9	11640.6	6138.28	156039	20759.8	12210.6	13380	11804.6	48089.4	14834.8	13153.4
4.27_192.0660m/z	192.066	4.27492	pos	5-Hydroxyindoleacetic acid	2975	Organoheterocyclic compounds	Indoles and derivatives	Indolyl carboxylic acids and derivatives	**	C05635	54.4	78.8	M+H	C10H9NO3	2.53532	1949.88	2228.16	1829.99	2664.91	2748.05	117.428	333.72	841.116	109.599	721.845	438.426	483.111	703.723	214.49	195.715	258.921
6.45_189.0790n	190.086	6.45292	pos	3-Indolepropionic acid	6602	Organoheterocyclic compounds	Indoles and derivatives	Indolyl carboxylic acids and derivatives	*		54.4	74.7	M+H-H2O, M+H	C11H11NO2	0.361177	3129.28	2859.4	2639.36	3217.86	3079.67	64.0062	547.297	2993.78	281.416	58409.4	198.991	178.784	34840.8	218.398	434.541	386.301
9.81_239.1289m/z	239.129	9.8103	neg	Cucujolide IV	LMFA07040036	Lipids and lipid-like molecules	Fatty Acyls	Fatty esters			54.4	74	M+FA-H	C12H18O2	-0.0666934	29815.8	34604.5	31401.5	31344.3	30518.9	41078.6	36586.3	42201.4	48524.4	37795.9	35925.2	39072.7	38853.9	40357.8	41749.8	38368.5
11.60_323.2591m/z	323.259	11.5991	neg	(±)11-HEDE	34607	Unclassified	Unclassified	Unclassified			54.3	77.4	M-H	C20H36O3	-0.282894	5779.59	6466.8	6205.86	5789.77	6039.7	2417.06	1050.89	1627.42	3134.23	14177.5	3014.06	1239.52	19702.6	8514.63	4857.68	1122.63
8.34_251.0924m/z	251.092	8.33982	neg	2,3-Dihydro-6-methoxy-2,2-dimethyl-4H-1-benzopyran-4-one	HMDB0041410	Organoheterocyclic compounds	Benzopyrans	1-benzopyrans			54.3	74.4	M+FA-H	C12H14O3	-0.516198	36781.5	38224.5	39799.6	38461.9	37948.6	45863.2	39164.4	49026.3	53302.3	43756.4	40577.5	39672.1	45524.9	43642.1	45030.7	43460.3
9.22_352.2250n	333.207	9.2229	neg	Prostaglandin E2	HMDB0001220	Lipids and lipid-like molecules	Fatty Acyls	Eicosanoids	***	C00584	54.3	76.3	M-H2O-H, M-H	C20H32O5	0.153644	26243.7	25517.7	25775.2	28068.7	27277.7	150.162	260.322	1998.95	442.891	17919.5	1380.9	528.242	10200.7	18970.1	8948.61	3702.08
1.19_282.1201m/z	282.12	1.1916	pos	N6-Methyladenosine	HMDB0004044	Nucleosides, nucleotides, and analogues	Purine nucleosides	Unclassified	***		54.2	78.1	M+H	C11H15N5O4	1.58773	48225	39122.2	35922.4	45319.9	50585.8	1467.93	11774.5	5563.72	5239.13	8329.87	9073.42	10345.2	5754.08	6084.66	7036.45	10158.6
10.75_495.3331n	496.34	10.7468	pos	PC(16:0/0:0)[U]	182	Unclassified	Unclassified	Unclassified			54.2	75.2	M+H, M+Na	C24H50NO7P	1.30237	246039	214616	213938	214765	235446	149654	124829	80375.8	43492.8	125111	178961	132509	105177	107523	69739	122961
10.93_314.2455n	295.228	10.9297	neg	9,10-Epoxyoctadecanoic acid	HMDB0061650	Lipids and lipid-like molecules	Fatty Acyls	Fatty acids and conjugates	*	C19620	54.2	75.2	M-H2O-H, M-H	C18H34O4	-0.576173	153439	159170	150872	170884	125726	45592.8	20384.4	30067.6	50773.8	101440	36648.2	19059.2	153547	125974	57416.9	19103
11.75_804.5755m/z	804.576	11.7484	neg	PE(18:0/19:1(9Z))	LMGP02010631	Lipids and lipid-like molecules	Glycerophospholipids	Glycerophosphoethanolamines			54.2	81.4	M+FA-H	C42H82NO8P	-0.614514	4.87664e+06	5.12404e+06	3.18702e+06	5.3132e+06	6.70133e+06	6.96993e+06	5.1526e+06	5.29251e+06	5.65219e+06	4.72068e+06	4.2758e+06	5.71098e+06	5.34322e+06	7.31159e+06	6.44466e+06	4.34378e+06
8.93_379.2490m/z	379.249	8.92743	neg	20-ethyl-PGE2	36221	Lipids and lipid-like molecules	Fatty Acyls	Eicosanoids			54.2	80.8	M-H	C22H36O5	0.0369682	11460.2	11737.3	10356.3	11096.5	10653.7	231.671	5.88962e-06	259.169	185.878	9408.4	111.26	5.88962e-06	7639.25	4411.71	1337.64	654.297
10.22_195.1018m/z	195.102	10.2242	pos	Butyl salicylate	HMDB0040730	Benzenoids	Benzene and substituted derivatives	Benzoic acids and derivatives	***		54.1	74.2	M+H	C11H14O3	1.38243	87699.4	89887.5	93280.9	88083.5	100675	85929.7	86352.2	84626.3	93553.9	76779.8	77386.6	71823.5	61178.4	77716.6	60549.9	87912
10.69_315.1965m/z	315.196	10.6887	neg	15-deoxy-δ-12,14-PGJ2	36099	Lipids and lipid-like molecules	Fatty Acyls	Eicosanoids	**	C14717	54.1	75.1	M-H	C20H28O3	-0.352193	13730.8	13436.1	12171.6	12966.1	11588	619.791	629.974	556.39	792.858	1178.52	1530.36	1248.95	1297.53	2718.48	1467.05	1979.59
0.89_175.0248m/z	175.025	0.889467	neg	Pectic acid	HMDB0003363	Organic oxygen compounds	Organooxygen compounds	Carbohydrates and carbohydrate conjugates	**	C00470	54	71.4	M-H2O-H	C6H10O7	-0.147272	155545	158527	149829	149822	146592	2432.52	376.348	47.9686	2546.37	438.485	1562.06	795.947	85.5334	81.9884	45.702	9510.75
10.07_334.2144n	379.21	10.0671	neg	Prostaglandin J2	HMDB0002710	Lipids and lipid-like molecules	Fatty Acyls	Eicosanoids	**	C05957	54	76.2	M-H, M+FA-H	C20H30O4	0.100418	15790.4	15416.1	14477.7	14779.1	16049.4	1194.7	1782.15	3369.87	3011.48	8517.81	583.108	375.542	21459.6	4457.06	5091.93	478.827
10.94_307.2279m/z	307.228	10.9419	neg	6-[3]-ladderane-1-hexanol	LMFA05000065	Lipids and lipid-like molecules	Fatty Acyls	Fatty alcohols			54	72.4	M+FA-H	C18H30O	0.12343	3006.41	3051.1	3275.15	3420.04	2727.4	1865.27	148.317	5.88962e-06	996.321	8017.88	1876.45	752.493	20591.6	7508.73	5064.37	497.34
11.37_522.2837m/z	522.284	11.3666	neg	PS(18:1(9Z)/0:0)	40829	Lipids and lipid-like molecules	Glycerophospholipids	Glycerophosphoserines			54	76.9	M-H	C24H46NO9P	-0.0989368	10427.1	10122	11251.6	13458.9	10450.3	3200.95	22744.8	7955.45	6068.43	14960.8	57169.7	60606.1	20873.7	13637.9	25390.4	20312.1
15.07_280.2638m/z	280.264	15.0688	pos	4E,14Z-Sphingadiene	LMSP01080002	Lipids and lipid-like molecules	Sphingolipids	Sphingoid bases			54	75	M+H-H2O	C18H35NO2	1.17542	1.03731e+06	1.09239e+06	1.14593e+06	1.20254e+06	1.21478e+06	1.13955e+06	1.06636e+06	1.27144e+06	1.26823e+06	1.2173e+06	1.18038e+06	1.07566e+06	895365	1.18199e+06	823897	1.16446e+06
7.75_334.2148n	335.222	7.75283	pos	(-)-Cassaic acid	LMPR0104090001	Lipids and lipid-like molecules	Prenol lipids	Isoprenoids			54	74.8	M+H-H2O, M+H	C20H30O4	1.03498	73559.2	72308.3	74503.9	79855	86466.6	2623.81	1765.62	8352.48	2994.43	70045.2	4898.05	2325.46	42439.8	96088.7	24025.8	23038.1
2.03_131.0349m/z	131.035	2.02898	neg	Glutaric acid	3254	Organic acids and derivatives	Carboxylic acids and derivatives	Dicarboxylic acids and derivatives	**	C00489	53.9	72.4	M-H	C5H8O4	-0.622442	10157.6	11786.8	11031.5	10907.1	11994.8	3193.8	2508.53	2492.33	3777.86	2368.55	6853.45	8693.47	2282.35	3538.3	3414.62	2795.66
4.35_245.1632n	246.171	4.35187	pos	2-Methylbutyroylcarnitine	HMDB0000378	Lipids and lipid-like molecules	Fatty Acyls	Fatty acid esters	***		53.9	74	M+H, M+Na	C12H23NO4	2.14682	1.20416e+06	1.15772e+06	1.10757e+06	1.04093e+06	1.18418e+06	14641	37163.6	46723.1	13297.6	80413.4	208444	86079.1	9087.71	25375.1	40357.6	99015.1
10.47_286.3108m/z	286.311	10.4667	pos	Spisulosine	53932	Lipids and lipid-like molecules	Sphingolipids	Sphingoid bases			53.8	74.2	M+H	C18H39NO	1.1646	13985.8	15115.1	14198.2	14225.3	15272.6	12370.3	7078.89	10116.8	10356.5	8929.38	6969.72	6869.34	4678.64	6792.23	6927.69	9957.75
10.84_544.2682m/z	544.268	10.8354	neg	PS(20:4(5Z,8Z,11Z,14Z)/0:0)	LMGP03050007	Lipids and lipid-like molecules	Glycerophospholipids	Glycerophosphoserines			53.7	73.7	M-H	C26H44NO9P	0.152657	1885.42	2332.53	2752.08	1741.03	1745.47	91543.4	13172.8	42368.4	42354.3	24077.7	7928.55	7759.35	22052.3	11747.2	15782.4	5494.21
8.62_355.2489m/z	355.249	8.6155	neg	13,14-dihydro-15-keto-PGF1alpha	LMFA03010168	Lipids and lipid-like molecules	Fatty Acyls	Eicosanoids			53.7	71.6	M-H	C20H36O5	-0.156138	2187.87	2532.78	2547.16	2359.38	2461.2	1353.86	1809.67	2959.18	1701.49	11115.1	2706.72	2953.75	33637	4425.21	3421.3	930.416
1.17_142.9985m/z	142.998	1.17223	neg	4-Hydroxy-2-oxoglutaric acid	HMDB0002070	Organic acids and derivatives	Keto acids and derivatives	Gamma-keto acids and derivatives	**	C01127	53.6	74.2	M-H2O-H	C5H6O6	-0.758737	641.12	744.508	1196.21	1002.1	731.713	275.412	2131.28	279.313	311.972	149.105	636.625	3312.87	113.451	1066.92	511.323	248.279
1.21_348.0709m/z	348.071	1.21112	pos	Adenosine 3'-monophosphate	63401	Nucleosides, nucleotides, and analogues	Ribonucleoside 3'-phosphates	Unclassified	**	C01367	53.6	76.1	M+H	C10H14N5O7P	1.66286	57719	55325.1	61891.5	65436	61207.9	1891.8	29160.7	14143	3620.72	23778.5	48648.2	54607.8	32888.7	93238.5	33569.4	71386.6
1.42_130.0509m/z	130.051	1.42188	neg	N-Acetyl-L-alanine	5733	Organic acids and derivatives	Carboxylic acids and derivatives	Amino acids, peptides, and analogues	*		53.6	74.7	M-H	C5H9NO3	-0.561497	8147.65	8542.56	8471.96	8966.22	9107.72	2352.1	5142.39	4140.74	3115.3	4238.26	5712.82	5791.63	5571.92	5205.37	7564.92	4598.97
10.77_310.2147n	333.204	10.7688	pos	7S,8S-DiHOTrE	35694	Lipids and lipid-like molecules	Fatty Acyls	Octadecanoids		C07357	53.6	73	M+H-H2O, M+Na, M+H	C18H30O4	0.784525	100592	85093.3	83418.9	82443.4	88013	8762.92	6225.19	7551.76	8168.36	7967	6805.31	7655.54	5812.77	7077.52	58504.1	7346.9
12.22_694.4299m/z	694.43	12.222	neg	PON-PC	LMGP20010008	Lipids and lipid-like molecules	Glycerophospholipids	Oxidized glycerophospholipids			53.6	70.5	M+FA-H	C33H64NO9P	-0.301471	184823	181994	162556	152054	170342	3455.31	1425.31	965.458	1901.45	2330.74	1541.19	1109.57	184.391	514.526	178.789	149.588
4.01_260.1378n	261.145	4.00757	pos	gamma-Glutamylleucine	HMDB0011171	Organic acids and derivatives	Carboxylic acids and derivatives	Amino acids, peptides, and analogues	***		53.6	73.4	M+H, M+Na	C11H20N2O5	2.03856	19228.6	18884.7	19490.6	19251.6	21505.6	3214.58	28328.9	11770.4	2994.12	13139.9	26771.4	21843.6	17566.6	9836.9	9793.01	4404.18
1.17_135.0312m/z	135.031	1.17223	neg	Hypoxanthine	HMDB0000157	Organoheterocyclic compounds	Imidazopyrimidines	Purines and purine derivatives	***	C00262	53.5	73.2	M-H	C5H4N4O	-0.227463	110094	152897	217645	241123	168294	129352	211665	213109	199849	204497	227783	173893	234831	164016	170768	228564
10.89_480.3095m/z	480.309	10.8882	neg	PC(15:0/0:0)	LMGP01050016	Lipids and lipid-like molecules	Glycerophospholipids	Glycerophosphocholines	**	C04230	53.5	71.8	M-H	C23H48NO7P	-0.204291	30299.8	32472.7	27083.2	31756.8	25785.7	25512.8	18812.2	15648.3	8857.21	16464.7	11268.7	20299.5	14113.6	12411.5	13461.6	16913
12.71_328.2401n	327.233	12.7076	neg	(4E,7E,10Z,13E,16E,19E)-docosa-4,7,10,13,16,19-hexaenoic acid	64830	Unclassified	Unclassified	Unclassified			53.5	71.5	M-H, M+FA-H, 2M-H	C22H32O2	-0.430822	289.482	353.914	401.046	594.742	372.36	27625.2	346127	205414	59570.3	195382	118321	240019	198883	174775	173521	64652.9
4.47_178.0509m/z	178.051	4.47253	neg	Hippuric acid	1301	Benzenoids	Benzene and substituted derivatives	Benzoic acids and derivatives	**	C01586	53.5	69	M-H	C9H9NO3	-0.126686	7975.22	9757.94	8743.14	9790.27	9837.41	4792.18	968.462	3872.63	549.985	11343.9	475.614	493.458	614.963	754.185	3585.69	527.112
4.85_463.1999n	464.207	4.85368	pos	4-hydroxy Nonenal Glutathione	64775	Organic acids and derivatives	Carboxylic acids and derivatives	Amino acids, peptides, and analogues			53.5	76.9	M+H, M+Na	C19H33N3O8S	2.35963	75432.5	67362.4	73637	69866.6	82259	12236.4	2507.37	343.153	30283.5	2539.97	2211.4	6380.35	2576.28	31761.2	1057.68	4731.57
9.81_417.2283m/z	417.228	9.8103	neg	9'-Carboxy-gamma-tocotrienol	HMDB0012869	Lipids and lipid-like molecules	Prenol lipids	Monoterpenoids	*		53.5	72.7	M+FA-H	C23H32O4	0.225998	1366.28	1777.58	1431.86	1486.18	1353.82	1397.95	1150.29	1170.96	1068.47	1184.47	722.574	1005.27	911.742	1932.63	859.092	29028.2
0.87_112.0509m/z	112.051	0.870567	pos	Cytosine	283	Organoheterocyclic compounds	Diazines	Pyrimidines and pyrimidine derivatives	**	C00380	53.4	73.6	M+H	C4H5N3O	3.55935	28298.2	27879.9	27445.4	28847.9	32753.4	567.545	2398.33	943.252	551.409	2582.49	4336.97	6552.08	875.136	2446.95	493.354	4125.57
1.53_251.0785m/z	251.079	1.53413	neg	Deoxyinosine	3383	Nucleosides, nucleotides, and analogues	Purine nucleosides	Purine 2'-deoxyribonucleosides	**	C05512	53.4	70.5	M-H	C10H12N4O4	-0.205618	6270.78	7152.39	8811.19	6805.72	8357.71	12968.1	3695.64	9539.83	4465.22	11710.5	2656.06	5221.09	2585.02	4639.15	2098.75	7310.68
10.02_460.2698m/z	460.27	10.0225	pos	Cinobufagin	LMST01130032	Unclassified	Unclassified	Unclassified			53.4	69.4	M+NH4	C26H34O6	0.944912	129190	123241	139777	124214	126805	108140	106393	88946.7	108682	98530.3	85076.5	72707.3	83663.9	124458	68544.3	121202
10.39_309.2072m/z	309.207	10.3927	neg	9(S)-HpOTrE	36025	Unclassified	Unclassified	Unclassified			53.4	71.2	M-H	C18H30O4	0.0669545	33453.8	36075.5	35420.2	35374.2	38393.2	3513.49	1971.67	3973.75	1285.23	3737.9	2474.03	2312.45	1312.9	3238.25	4783.83	7135.33
11.03_626.3675m/z	626.368	11.0303	neg	PS(22:0/0:0)	LMGP03050025	Lipids and lipid-like molecules	Glycerophospholipids	Glycerophosphoserines			53.4	69.8	M+FA-H	C28H56NO9P	0.110749	31219.8	26759.8	28030.8	28452.1	27563.6	124.36	5.88962e-06	5.88962e-06	5.88962e-06	125.318	85.7547	126.97	5.88962e-06	120.749	119.335	106.144
11.13_524.3358m/z	524.336	11.1311	neg	PC(P-16:0/0:0)	LMGP01070006	Lipids and lipid-like molecules	Glycerophospholipids	Glycerophosphocholines	*		53.4	73.9	M+FA-H	C24H50NO6P	0.017297	2962.73	3459	2589.31	2984.33	2071.46	14905.4	26395.1	12838	8369.18	10979.6	22106.3	19609.6	46176.6	16975.1	21753.9	8161.24
2.47_164.0716m/z	164.072	2.47267	neg	L-Phenylalanine	28	Organic acids and derivatives	Carboxylic acids and derivatives	Amino acids, peptides, and analogues	**	C00079	53.4	70.1	M-H	C9H11NO2	-0.655823	8487.08	9489	9550.13	10969.3	12922.6	4951.37	16126.7	5999.62	5046.11	9425.27	14669.8	17043.3	21598.3	11709.5	16680.2	9687.21
9.46_335.2228m/z	335.223	9.46088	neg	4-Androstenediol	HMDB0005849	Lipids and lipid-like molecules	Steroids and steroid derivatives	Androstane steroids	*	C14210	53.4	70	M+FA-H	C19H30O2	0.0905691	1312.35	1494.21	1502.24	1676.9	1378.57	1126.58	6512.21	2872.89	1646.99	8358.65	2364.04	1805.36	60587.5	12959.9	4795.41	1099.32
0.87_363.0581n	362.051	0.868767	neg	Guanidylic acid (guanosine monophosphate)	98	Unclassified	Unclassified	Unclassified			53.3	71.4	M-H, 2M-H	C10H14N5O8P	0.196054	248689	283765	268418	278181	263227	33853.2	1376.04	917.59	23668.1	4587.8	3219.17	3357.51	2531.56	23482.9	1512.82	8272.36
10.38_329.3297n	330.337	10.3844	pos	N,N-dimethyl-Safingol	53956	Lipids and lipid-like molecules	Sphingolipids	Sphingoid bases			53.3	71.5	M+H, M+Na	C20H43NO2	1.10302	38890.7	35108.9	39319.6	35090	44031.8	97109.6	50043.4	71363.6	78397.4	56298.2	54694.5	48039.1	35814.1	38762.5	53478.8	107594
12.36_414.3140n	437.303	12.3571	pos	HU-308	64923	Unclassified	Unclassified	Unclassified			53.3	72.9	M+Na, M+K, M+H	C27H42O3	1.44805	61693.8	57006.8	75829.4	75354.8	70492.4	901.086	24.6247	155.912	1301.38	1896.91	274.092	5.42045	162.515	410.381	1232.34	140.082
7.09_392.2176n	393.225	7.09412	pos	Isodomedin	67439	Unclassified	Unclassified	Unclassified			53.3	79.9	M+H, M+Na	C22H32O6	-5.80951	42107.6	43583.3	44657.6	44347.7	43030	8730.87	1731.47	464.562	8551.53	33780.4	7555.72	4670.13	120332	31314.3	25025.3	612.611
9.26_271.2514n	272.259	9.2554	pos	C16 Sphingosine	53900	Lipids and lipid-like molecules	Sphingolipids	Sphingoid bases			53.2	70.6	M+H, M+K, M+Na	C16H33NO2	0.955892	321253	313151	325647	319892	333067	313398	288457	305869	326937	278422	301729	292553	256689	328160	223177	330396
0.71_161.1286m/z	161.129	0.710867	pos	Isoputreanine	HMDB0006009	Organic acids and derivatives	Carboxylic acids and derivatives	Amino acids, peptides, and analogues	*		53.1	69.6	M+H	C7H16N2O2	0.861878	9096.06	9507.49	9388.94	9948.21	8927.67	1945.38	16108.8	2165.43	1662.85	2830.76	13141.3	11825.8	8334.7	5894.32	4606.13	6537.53
0.75_214.0487m/z	214.049	0.748083	neg	Glycerylphosphorylethanolamine	HMDB0000114	Lipids and lipid-like molecules	Glycerophospholipids	Glycerophosphoethanolamines	**	C01233	53.1	68.4	M-H	C5H14NO6P	0.247711	169666	139489	132548	141393	213708	10106.1	16226.6	9295.97	6532.86	8267.04	33753.1	36728.3	11455	11101.5	19351.4	19871.7
1.40_218.0670m/z	218.067	1.39973	neg	N-(1-Deoxy-1-fructosyl)glycine	HMDB0037848	Organic oxygen compounds	Organooxygen compounds	Carbohydrates and carbohydrate conjugates			53.1	68.2	M-H2O-H	C8H15NO7	-0.136762	5813.72	6078.35	6125.62	6487.92	6416.7	427.913	1364.25	347.348	204.772	636.443	5560.08	4751.39	281.246	1431.25	649.281	2512.4
10.06_467.3019n	468.309	10.057	pos	Buprenorphine	1420	Benzenoids	Phenanthrenes and derivatives	Unclassified		C08007	53.1	78.5	M+H, M+Na	C29H41NO4	-3.65228	144007	132837	142774	119906	155509	11571.6	9305.35	13701.8	1713.67	15905.8	4352.56	9500.87	11197.5	10209.5	11406.9	7314.51
10.71_309.2072m/z	309.207	10.7098	neg	Corchorifatty acid F	HMDB0035919	Lipids and lipid-like molecules	Fatty Acyls	Lineolic acids and derivatives	*		53.1	69.2	M-H2O-H	C18H32O5	0.105736	36889	37796.2	36270.8	39320.1	38184.7	1628.32	1569.27	2681.17	1317.01	4130.16	1599.24	3258.2	1978.56	2173.89	68489.5	2254.99
11.15_294.2198n	295.227	11.1497	pos	17-hydroxy-linolenic acid	LMFA02000239	Lipids and lipid-like molecules	Fatty Acyls	Octadecanoids			53.1	70.3	M+H-H2O, M+H	C18H30O3	1.1174	155907	151442	151320	157604	153617	14883	8200.13	12358.2	16339.5	17431	11696.5	8778.91	11877.9	16014.6	9129.43	10285.7
11.50_652.3833m/z	652.383	11.5039	neg	PON-PE	LMGP20020028	Lipids and lipid-like molecules	Glycerophospholipids	Oxidized glycerophospholipids			53.1	70.8	M+FA-H	C30H58NO9P	0.36121	61754.3	65222.8	57030.5	51515.4	58237.1	562.578	118.466	122.581	5.88962e-06	412.853	229.261	236.89	129.095	5.88962e-06	5.88962e-06	5.88962e-06
12.42_271.2277m/z	271.228	12.4181	neg	2-hydroxyhexadecanoic acid	34495	Lipids and lipid-like molecules	Fatty Acyls	Fatty acids and conjugates	*		53.1	70.8	M-H	C16H32O3	-0.471974	21906.3	21053.5	20054.4	20483.5	23415	17741.8	21003.8	23517.5	17978.9	30373.6	20774.6	18495.1	22265.6	22967.8	20895.6	26480.3
3.85_297.0896n	342.088	3.8459	neg	5'-Methylthioadenosine	HMDB0001173	Nucleosides, nucleotides, and analogues	5'-deoxyribonucleosides	5'-deoxy-5'-thionucleosides	***	C00170	53.1	69.7	M-H, M+FA-H	C11H15N5O3S	0.0557779	45754	45760.5	46443.4	53639.9	49694.6	430.721	2161.57	192.41	482.338	4719.17	6191.5	9322.59	422.742	1196.66	436.645	3231.05
4.37_190.1078m/z	190.108	4.37402	pos	(2S)-2-{[1-(R)-Carboxyethyl]amino}pentanoate	66366	Unclassified	Unclassified	Unclassified			53.1	69.6	M+H	C8H15NO4	1.93455	3958.13	3703.42	3249.25	3381.59	3723.9	424.661	2174.95	501.431	413.132	1083.5	3799.03	3958.79	594.292	1809.76	514.734	1260.56
6.98_208.0615m/z	208.061	6.97557	neg	3-Methyldioxyindole	HMDB0004186	Organoheterocyclic compounds	Indoles and derivatives	Indolines	**	C05834	53.1	68.8	M+FA-H	C9H9NO2	-0.403361	744.36	677.414	657.572	631.719	727.686	21135.1	2966.42	13830.1	29567.1	11533.9	1726.85	2288.06	6400.56	11276.8	2819.29	1717.24
9.48_358.2123n	359.22	9.48373	pos	4S-hydroxy-8-oxo-(5E,9Z,13Z,16Z,19Z)-neuroprostapentaenoic acid-cyclo[7S,11S]	75209	Unclassified	Unclassified	Unclassified			53.1	80.3	M+H, M+Na	C22H30O4	-5.85643	2329.95	2399.57	2707.85	2497.91	2838.77	970.375	4196.71	1930.19	1343.46	5397.53	2061.32	1767.43	25145.9	6952.5	1847.39	1531.47
0.79_203.1506m/z	203.151	0.791433	pos	Asymmetric dimethylarginine	HMDB0001539	Organic acids and derivatives	Carboxylic acids and derivatives	Amino acids, peptides, and analogues	***	C03626	53	76.3	M+H	C8H18N4O2	1.49584	234109	221587	223848	232651	278368	23358.3	153602	70248.7	18530.5	80951.9	145556	144869	155921	121468	55590.6	58248.7
0.98_588.0752m/z	588.075	0.97615	neg	GDP-L-fucose	63158	Nucleosides, nucleotides, and analogues	Purine nucleotides	Purine nucleotide sugars	**	C00325	53	73	M-H	C16H25N5O15P2	0.419445	48533.7	53333.9	48697.3	54314	52176.8	24308.7	11168.1	10956.7	29546	20680.5	29977.2	10860.9	627.397	20101.4	1064.12	23893.4
1.52_293.1480n	294.155	1.51642	pos	N-(1-Deoxy-1-fructosyl)isoleucine	HMDB0039780	Organic acids and derivatives	Carboxylic acids and derivatives	Amino acids, peptides, and analogues	***		53	73	M+H-H2O, M+H	C12H23NO7	1.95914	3260.11	3405.4	3242.86	3591.58	4077.38	13135.2	12628.5	35435.5	769.852	28754.2	2493.34	5261.05	7402.35	7690.17	16352.9	4128.98
10.27_460.2697m/z	460.27	10.2743	pos	3-O-Acetylepisamarcandin	HMDB0031958	Phenylpropanoids and polyketides	Coumarins and derivatives	Unclassified	*		53	67.5	M+NH4	C26H34O6	0.766649	101732	90157.3	107929	103010	95086.4	87112.8	74996.2	71990.1	84935.6	66005.3	63960	53916	49519.8	82961	51590.8	124675
11.18_320.2350n	319.228	11.1815	neg	11,12-Epoxyeicosatrienoic acid	HMDB0004673	Lipids and lipid-like molecules	Fatty Acyls	Eicosanoids	***		53	68.5	M-H, 2M-H, M-H2O-H	C20H32O3	-0.597885	142716	129814	152316	145226	146689	338290	905745	431687	470810	694420	115069	128726	3.23846e+06	702247	406492	51106.9
2.25_366.1434n	367.151	2.25428	pos	Tryptophan 2-C-mannoside	HMDB0240296	Organoheterocyclic compounds	Indoles and derivatives	Indolyl carboxylic acids and derivatives			53	71.7	M+H, M+Na	C17H22N2O7	1.99863	108513	101628	91692	102049	109763	9381.25	84777.5	27004.5	13422.9	44257.6	110667	101372	44715.1	82867.4	44979.9	181168
3.86_334.1407m/z	334.141	3.85602	pos	Tryptophyl-Glutamate	HMDB0029082	Organic acids and derivatives	Carboxylic acids and derivatives	Amino acids, peptides, and analogues	*		53	73.8	M+H	C16H19N3O5	2.79521	2980.91	2401.39	2188.84	1876.94	1935.68	1580.1	1672.49	393.942	1559.64	734.532	7016.3	6186.87	1894.01	2940.69	1716.9	2977.44
4.71_234.1735n	235.181	4.70952	pos	Lidocaine	995	Benzenoids	Benzene and substituted derivatives	Xylenes	**	C07073	53	68.1	M+H, M+Na	C14H22N2O	1.17222	394.046	417.234	359.96	448.874	413.428	112032	245.497	339.536	359.171	325.418	657.73	891.75	93.6487	447.285	156.988	604.38
0.79_565.0479m/z	565.048	0.78745	neg	UDP-D-galactose	3599	Nucleosides, nucleotides, and analogues	Pyrimidine nucleotides	Pyrimidine nucleotide sugars	**	C00052	52.9	66.8	M-H	C15H24N2O17P2	0.193312	658908	683129	636118	682132	639624	104876	9305.09	14721.2	94853.4	58220.6	37858.3	788.671	310.961	23432.3	5.88962e-06	12677.8
10.30_262.1936n	263.201	10.2969	pos	10E,16-heptadecadien-8-ynoic acid	LMFA01030475	Lipids and lipid-like molecules	Fatty Acyls	Fatty Acids and Conjugates			52.9	68.6	M+H-H2O, M+H	C17H26O2	1.11406	59613.1	60668.4	55556.7	54678.2	62051.5	20285.8	2986.8	5061.45	15198.2	60948.2	10537.2	5231.85	125907	53046.6	38615.9	6245.44
11.50_345.2434m/z	345.243	11.5039	neg	11-deoxy-16,16-dimethyl-PGE2	LMFA03010062	Lipids and lipid-like molecules	Fatty Acyls	Eicosanoids			52.9	69.3	M-H2O-H	C22H36O4	-0.324822	434.441	521.712	425.549	529.946	621.512	5950.81	4827.93	3086.54	3240.69	13015.7	461.292	465.227	64083.1	7157.59	1985.4	156.815
12.29_301.2171m/z	301.217	12.2901	neg	Eicosapentaenoic acid	HMDB0001999	Lipids and lipid-like molecules	Fatty Acyls	Fatty acids and conjugates	***	C06428	52.9	68.6	M-H	C20H30O2	-0.556699	355.029	246.602	297.278	198.657	315.619	2822.9	40677.2	19990.8	10166.3	18743.6	15043.5	27804.9	19375.9	26409.1	20596	12651.7
14.66_324.3265m/z	324.327	14.6581	pos	2-Heptadecylfuran	HMDB0033608	Organoheterocyclic compounds	Heteroaromatic compounds	Unclassified			52.9	69.9	M+NH4	C21H38O	1.39579	2523.82	2616.32	2295.08	2667.1	2517.7	14101.5	2493.84	2843.63	7427.02	4528.48	6763.84	4322.28	17105.9	10482.8	2280.29	13398.5
8.69_243.1601m/z	243.16	8.68632	neg	1,11-Undecanedicarboxylic acid	6622	Lipids and lipid-like molecules	Fatty Acyls	Fatty acids and conjugates	*		52.9	68.2	M-H	C13H24O4	-0.537399	8545.68	7917.67	6886.85	7976.25	7264.9	8878.84	6968.47	7866.81	9409.1	7688.83	7563.17	7598.34	7138.79	7645.67	8317.33	8208.36
9.54_267.1138m/z	267.114	9.5443	neg	Cromakalim	HMDB0250542	Unclassified	Unclassified	Unclassified			52.9	67.9	M-H2O-H	C16H18N2O3	-0.349352	312.489	371.217	565.776	604.304	628.852	8605.21	12596.3	11784.5	7911.34	10405.6	11946.8	10359.4	9664.9	7086.19	6988.07	10211.2
0.77_229.0118m/z	229.012	0.769183	neg	Ribose 1-phosphate	3370	Organic oxygen compounds	Organooxygen compounds	Carbohydrates and carbohydrate conjugates	**	C00620	52.8	68.7	M-H	C5H11O8P	-0.480757	60721.3	63157.9	62934.8	66159	61722.1	40598.1	27385.1	22998.8	39505.9	39228.3	35814	38507.4	24289.6	36945.2	17859.7	55940.6
0.81_606.0745m/z	606.074	0.805983	neg	Uridine diphosphate-N-acetylglucosamine	41549	Nucleosides, nucleotides, and analogues	Pyrimidine nucleotides	Pyrimidine nucleotide sugars	**	C00043	52.8	66.3	M-H	C17H27N3O17P2	0.335076	908532	960760	859982	947867	871118	35484.9	18721.9	6237.87	43235	68328.9	187474	33616.7	5610.79	46406.8	3927.9	9425.51
10.25_295.2271m/z	295.227	10.2487	pos	9(S)-HOTrE	36030	Unclassified	Unclassified	Unclassified			52.8	69	M+H	C18H30O3	1.13043	28211.2	26223.2	28873.5	27387	29222.1	3422.14	2360.34	3583.52	4222.6	3434.75	3254.39	2549.89	2768.51	4042.73	2839.91	2588.15
9.29_313.2620n	336.251	9.28775	pos	N-palmitoyl glycine	LMFA08020079	Organic acids and derivatives	Carboxylic acids and derivatives	Amino acids, peptides, and analogues	*		52.8	69.9	M+Na, M+K, M+H	C18H35NO3	0.896226	62911.7	62654.2	65916.9	66459.8	68311.8	58207.6	55685.7	56207.9	64044.2	52246.8	59113	56076.2	48334.7	66835.3	43808.2	66529.7
1.38_118.0266n	117.019	1.37747	neg	Succinic acid	HMDB0000254	Organic acids and derivatives	Carboxylic acids and derivatives	Dicarboxylic acids and derivatives	***	C00042	52.7	65	M-H, 2M-H	C4H6O4	-0.474339	8057.58	8999.34	9058.05	9133.03	9425.83	2322.75	1350.55	3686.27	2621.87	2704.73	2040.33	1223.88	1337.03	1526.45	8863.84	4487.37
1.68_220.0852n	221.093	1.6847	pos	5-Hydroxy-L-tryptophan	364	Organoheterocyclic compounds	Indoles and derivatives	Tryptamines and derivatives	**	C00643	52.7	72.5	M+H-H2O, M+H	C11H12N2O3	1.67302	8834.13	7553.18	8741.94	9441.39	9207.21	3563.03	5773.98	10324.6	5901.09	7037.56	5223.98	7621.22	5573.06	12201.7	3330.53	8949.88
2.36_207.0775m/z	207.078	2.35933	neg	Kynurenine	72	Organic oxygen compounds	Organooxygen compounds	Carbonyl compounds	**	C00328	52.7	68.5	M-H	C10H12N2O3	-0.0252718	933.803	843.637	914.815	979.853	987.989	57.2114	644.942	1643.71	45.6518	1703.7	820.522	1093.9	1099.35	2841.69	398.954	1333.62
9.98_293.1757m/z	293.176	9.97762	neg	Furanofukinin	HMDB0036640	Lipids and lipid-like molecules	Prenol lipids	Sesquiterpenoids	*		52.7	71.8	M+FA-H	C16H24O2	-0.340369	25160	28745.3	26837.1	27229.6	25591	33348.4	26921.9	30608.6	34403.5	27149.1	27040.2	28765	27378.8	30277.8	30514.6	30821
0.71_486.2067n	487.214	0.710867	pos	Glucosylgalactosyl hydroxylysine	HMDB0000585	Lipids and lipid-like molecules	Fatty Acyls	Fatty acyl glycosides	*		52.6	71.1	M+H, M+Na	C18H34N2O13	1.34415	9459.33	11719	12303.1	10380.6	10116.3	1684.83	7140.82	6257.68	2178.11	12942.2	16745.3	18749.5	3106.85	11946.8	20224.7	31197
10.79_254.2248n	255.232	10.7913	pos	11Z-hexadecenoic acid	34926	Unclassified	Unclassified	Unclassified			52.6	72.4	M+H-H2O, M+H	C16H30O2	0.932311	10602.1	9341.45	8718.65	8475.82	9072.88	7555.23	10335.3	9443.37	7425.89	8485.06	7755.86	6176.72	9138.44	19114.9	6206.64	14708.1
2.36_191.0586n	209.092	2.36175	pos	Desmethyldeschlorobenzoyl Indomethacin	828	Unclassified	Unclassified	Unclassified			52.6	66.3	M+H, M+NH4, M+H-H2O	C10H9NO3	1.79196	88371	81824.8	98933.3	93941.1	94492.9	12111.4	76885.2	136503	13185.8	170665	67079.6	94805.1	71701.3	268350	26144.1	137246
9.04_316.2850m/z	316.285	9.04075	pos	Dehydrophytosphingosine	LMSP01030002	Organic nitrogen compounds	Organonitrogen compounds	Amines			52.6	69.3	M+H	C18H37NO3	1.26956	3056.91	2645.6	2876.45	3004.25	3010.12	2532.07	3915.98	3861.6	3032.36	4305.57	7486.53	6554.94	5231.18	4684.99	3322.01	4603.08
0.77_399.1449m/z	399.145	0.773167	pos	S-Adenosylmethionine	3289	Nucleosides, nucleotides, and analogues	5'-deoxyribonucleosides	5'-deoxy-5'-thionucleosides	**	C00019	52.5	73.1	M+H	C15H22N6O5S	0.863046	60423.5	77198.5	53449.1	56308.4	52083.4	208.827	1293.94	5.88962e-06	5.88962e-06	3837.09	12719.2	14058.7	256.836	1075.93	186.856	3557.66
0.87_347.0399m/z	347.04	0.868767	neg	Inosine 5'-monophosphate (IMP)	3490	Unclassified	Unclassified	Unclassified			52.5	64.9	M-H	C10H13N4O8P	0.325263	803919	744669	755300	761433	878991	926977	5233.92	5404.51	1.16052e+06	28028.8	10361.2	6846.63	5643.11	283719	1020.01	8163.83
1.29_304.0906n	303.083	1.288	neg	N-Acetylaspartylglutamic acid	HMDB0001067	Organic acids and derivatives	Carboxylic acids and derivatives	Amino acids, peptides, and analogues	***	C12270	52.5	65.8	M-H2O-H, M-H	C11H16N2O8	-0.29898	5064.53	5624.29	5431.64	5758.37	5919.82	594.811	75076.7	4929.58	2741.4	25372.6	47638.4	36975.3	19421.4	27711.8	42894.6	22968.1
10.64_335.2229m/z	335.223	10.6417	neg	Hepoxilin B3	7071	Lipids and lipid-like molecules	Fatty Acyls	Eicosanoids	**	C14810	52.5	68.1	M-H	C20H32O4	0.275416	13541.9	14370.1	14434.8	15933.1	14161.5	6177.87	10568.4	19426.5	8875.76	35117.5	2581.64	3386.23	150697	22656.8	25324.8	2737.76
11.75_480.3094m/z	480.309	11.7484	neg	PE(18:0/0:0)	LMGP02050001	Lipids and lipid-like molecules	Glycerophospholipids	Glycerophosphoethanolamines			52.5	64.4	M-H	C23H48NO7P	-0.431547	337671	353607	321203	334864	311711	139179	245788	241280	84113.5	206593	162750	229193	251609	178018	240107	115096
0.87_266.9668m/z	266.967	0.870567	pos	3-Phospho-D-glyceroyl phosphate	63116	Organic acids and derivatives	Organic phosphoric acids and derivatives	Phosphate esters	**	C00236	52.4	65.3	M+H	C3H8O10P2	1.06577	713.266	704.534	521.133	405.741	655.774	135286	1819.35	2535.54	17863.9	3591.39	1710.06	1888.42	1827.01	4441.01	1134.33	2088.28
11.66_546.3538m/z	546.354	11.6573	pos	PC(0:0/18:0)	LMGP01050076	Lipids and lipid-like molecules	Glycerophospholipids	Glycerophosphocholines	*		52.4	71.8	M+Na	C26H54NO7P	1.5413	12449.7	13130	15228.7	17151.8	18354.3	14171	5454.86	4577.82	5446.41	7523.86	3008.76	5781.23	5913.04	7474.88	2366.02	6178.12
3.81_253.1190m/z	253.119	3.81065	pos	Tyrosyl-Alanine	HMDB0029098	Organic acids and derivatives	Carboxylic acids and derivatives	Amino acids, peptides, and analogues	*		52.4	68.6	M+H	C12H16N2O4	2.66474	627.379	763.629	793.374	591.488	703.724	831.086	838.225	426.277	859.09	695.079	5737.76	3354.77	1031.68	3381.37	1918.79	1624.66
7.57_446.1219n	429.119	7.57353	pos	Luteolin 7-methyl ether 4'-rhamnoside	LMPK12111039	Lipids and lipid-like molecules	Polyketides	Flavonoids			52.4	66.1	M+H-H2O, M+H, M+K	C22H22O10	1.2966	88036.1	73380.8	74316.8	80513.6	82381.5	74767.1	64050.7	67730.4	70995.7	59925.6	72706.2	73406.4	65215.5	82208.2	55346.8	83475.6
0.75_180.0634n	225.062	0.748083	neg	myo-Inositol	144	Organic oxygen compounds	Organooxygen compounds	Alcohols and polyols	**	C00137	52.3	62.6	M-H, M+FA-H	C6H12O6	-0.0195684	106593	78070.7	58829	79497.3	103356	37779.8	96084.7	46099.2	20842.1	159268	160981	59214.7	89925.4	154499	48633.3	86506.8
1.20_333.0939m/z	333.094	1.19978	neg	(S)-a-Amino-2,5-dihydro-5-oxo-4-isoxazolepropanoic acid N2-glucoside	HMDB0029404	Organic oxygen compounds	Organooxygen compounds	Carbohydrates and carbohydrate conjugates	*		52.3	63.2	M-H	C12H18N2O9	-0.063136	392833	369618	403528	387623	380946	35231.8	552052	136444	94561.3	352062	865043	834745	225754	403104	361553	739288
10.30_452.2776m/z	452.278	10.2969	pos	LysoPE(16:1(9Z)/0:0)	62290	Lipids and lipid-like molecules	Glycerophospholipids	Glycerophosphoethanolamines	*		52.3	70.4	M+H	C21H42NO7P	0.975255	12454.4	13415.8	12210.4	11868.1	13304.3	1677.22	1438.69	1423.24	519.024	1880.12	1336.34	803.489	809.448	1042.12	714.491	450.29
11.04_431.3161m/z	431.316	11.0395	pos	2,22-Dideoxy-3-dehydroecdysone	64607	Unclassified	Unclassified	Unclassified			52.3	71.9	M+H	C27H42O4	1.27249	2624.59	2405.01	2180.72	2153.92	2558.14	1572.63	3570.24	3424.98	1118.59	5063.07	2085.59	2806.68	1407.97	4253.5	2635.74	9118.84
11.09_438.2990m/z	438.299	11.0878	neg	PE(O-16:0/0:0)	LMGP02060002	Lipids and lipid-like molecules	Glycerophospholipids	Glycerophosphoethanolamines			52.3	67.9	M-H	C21H46NO6P	-0.0755593	21024.2	21129.4	19447.6	19846.5	17478.8	9122.81	4705.67	5278.67	3819.97	4155.06	3623.86	3588.48	1943.19	2284.24	2250.1	781.339
11.39_305.2478m/z	305.248	11.3931	pos	omega-3 Arachidonic Acid	62952	Unclassified	Unclassified	Unclassified			52.3	66.8	M+H	C20H32O2	1.08246	5866.85	5579.41	6039.95	5884.24	6023.51	4900.05	30397.6	11772.3	12895.9	46794.5	13544.1	7984.15	128161	28580.7	6281.78	4123.56
9.30_334.2148n	317.212	9.29865	pos	8-J2-IsoP	LMFA03110059	Unclassified	Unclassified	Unclassified			52.3	66.6	M+H-H2O, M+Na	C20H30O4	1.18129	30457	29324.4	29762.8	29017	31866.9	439.206	776.635	1626.39	836.762	15746.8	2717.68	1361.94	7542.01	16894.7	6430.46	4759
9.41_277.1801m/z	277.18	9.41052	pos	Buddledin A	67850	Unclassified	Unclassified	Unclassified			52.3	66.6	M+H	C17H24O3	1.18285	5575.32	7040.15	7983.93	7705.02	7063.79	6419.02	4991.96	4572.56	7726.67	5191.47	5805.96	5978.15	5153.5	7381	4152.2	5776.6
9.75_301.2984n	302.306	9.74973	pos	Enigmol	53958	Lipids and lipid-like molecules	Sphingolipids	Sphingoid bases			52.3	65.9	M+H, M+Na	C18H39NO2	1.05761	88678.6	80081	81137.5	81341.3	93404	128792	72904	106550	107105	105232	92388.4	169737	94833.5	103369	192025	217924
10.75_269.2113m/z	269.211	10.7468	pos	(1R,2R)-3-oxo-2-pentyl-cyclopentanehexanoic acid	74959	Lipids and lipid-like molecules	Fatty Acyls	Octadecanoids			52.2	65.8	M+H	C16H28O3	0.850342	12444.3	13343.9	11618.5	11714.3	12722.4	4814.67	3484.31	4501.96	4480.42	3301.7	3872.19	4599.46	2952.45	4538.49	2862.81	4067.61
11.22_267.2110m/z	267.211	11.2159	pos	11-cis-retinal	LMPR01090003	Lipids and lipid-like molecules	Prenol lipids	Retinoids	**	C00376	52.2	67.3	M+H-H2O	C20H28O	0.867663	131.09	122.138	90.1304	83.1082	158.018	474.119	2981.4	597.451	629.705	1685.79	94.7292	110.078	9324.55	1395.7	374.209	5.88962e-06
3.99_172.9913m/z	172.991	3.98995	neg	Phenol sulphate	HMDB0060015	Organic acids and derivatives	Organic sulfuric acids and derivatives	Arylsulfates	***	C02180	52.2	73.4	M-H	C6H6O4S	-0.548557	22953.3	21127.9	23956.8	24391.5	22822.1	5419.22	30216.8	14074.2	9669.19	14421.1	11638.5	7451.52	3883.06	16965.6	19030.9	13712
4.44_376.1392n	377.146	4.44155	pos	Riboflavin	HMDB0000244	Organoheterocyclic compounds	Pteridines and derivatives	Alloxazines and isoalloxazines	***	C00255	52.2	72.3	M+H, M+Na	C17H20N4O6	2.43573	7168.24	5839.71	6519.95	6428.19	7280.32	259.44	6610.16	1463.38	310.944	1741.71	4287.62	13478.3	5336.43	5018.99	6474.42	11466.4
6.36_642.3060m/z	642.306	6.3591	pos	S-(9-deoxy-delta9,12-PGD2)-glutathione	HMDB0013058	Organic acids and derivatives	Carboxylic acids and derivatives	Amino acids, peptides, and analogues	*		52.2	67.4	M+H	C30H47N3O10S	0.81466	47681.3	48717.8	46714.5	44931.7	44693.5	5.88962e-06	99.5246	44.1441	5.88962e-06	1056.35	1751.63	968.675	1863.27	42181.6	545.617	10404
10.27_280.2037n	279.196	10.2744	neg	12-hydroxy-5,8,10-heptadecatrienoic acid	LMFA01050195	Lipids and lipid-like molecules	Fatty Acyls	Fatty acids and conjugates	*	C20388	52.1	64.1	M-H2O-H, M+FA-H, M-H	C17H28O3	-0.631806	30960.6	32439.5	32575.7	41636.8	33413.8	11375.7	2379.11	3770.03	11225.7	37560.9	6751.73	3427.94	107664	36987.6	41593.7	3630.3
7.45_329.2333m/z	329.233	7.45223	neg	9,10,13-TriHOME	HMDB0004710	Lipids and lipid-like molecules	Fatty Acyls	Fatty acids and conjugates	***	C14835	52.1	64.8	M-H	C18H34O5	-0.111192	112451	117274	118849	123034	126883	22137.6	13937.9	17325.8	32387.5	27464.7	15728.1	14628.2	24837.7	27554.5	24660.1	15362.9
1.30_164.0476n	182.082	1.29677	pos	2-Hydroxycinnamic acid	306	Phenylpropanoids and polyketides	Cinnamic acids and derivatives	Hydroxycinnamic acids and derivatives	**	C01772	52	69.8	M+H, M+NH4, M+H-H2O	C9H8O3	1.59753	1.69438e+06	1.50313e+06	1.68652e+06	1.65555e+06	1.72825e+06	299586	1.40487e+06	395209	290159	639594	1.43101e+06	1.54234e+06	1.35418e+06	1.08439e+06	980844	750901
3.71_145.0506m/z	145.051	3.7128	neg	Adipic acid	115	Lipids and lipid-like molecules	Fatty Acyls	Fatty acids and conjugates	**	C06104	52	63.9	M-H	C6H10O4	-0.160602	4952.03	5001.07	5052.25	5784.19	5806.38	5861.93	4806.05	5028.29	5778.5	5269.44	6131.19	5014.29	5764.16	7002.93	5817.64	6678.26
5.04_172.1101n	155.107	5.04318	pos	9-hydroxy-5Z-nonenoic acid	74606	Lipids and lipid-like molecules	Fatty Acyls	Fatty Acids and Conjugates			52	63.2	M+H-H2O, M+H	C9H16O3	0.682442	92271.8	83290.6	79489	88876.8	90713.8	84746.8	66437.4	77613.2	83768.4	75530.6	73792.1	71957.4	57557	79074.7	45316.7	82367.1
5.15_238.1076m/z	238.108	5.14927	pos	N-lactoyl-Phenylalanine	HMDB0062175	Organic acids and derivatives	Carboxylic acids and derivatives	Amino acids, peptides, and analogues	***		52	64	M+H	C12H15NO4	1.00036	17194.2	16709.3	14662.8	14917.6	18756.7	316.099	7755.34	466.746	451.018	2177.98	12365.6	7212.99	2515.44	4663.3	1154.84	3968.96
9.84_315.2777n	338.267	9.83993	pos	(4OH,8Z,t18:1) sphingosine	53909	Unclassified	Unclassified	Unclassified			52	64.8	M+Na, M+K, M+H, M+H-H2O	C18H37NO3	0.991017	388055	366915	390704	395246	404675	350320	324532	371668	357679	300784	344965	305980	282682	382078	249517	381950
0.58_203.2233m/z	203.223	0.58325	pos	Spermine	255	Organic nitrogen compounds	Organonitrogen compounds	Amines	**	C00750	51.9	72.8	M+H	C10H26N4	1.55653	1804.38	1423.75	1296.97	1241.05	1113.38	38936.4	3439.53	11838.7	3302.11	13071.3	1787.29	1954.59	3044.99	2663.48	927.462	1456.12
6.14_201.1132m/z	201.113	6.14133	neg	2-amyl 3-butenoic acid	LMFA01020127	Lipids and lipid-like molecules	Fatty Acyls	Fatty Acids and Conjugates			51.9	60.6	M+FA-H	C9H16O2	-0.0618411	6458.81	6551.27	7514.96	7296.36	7460.41	6334.86	5123.62	5415.88	6790.56	6034.93	5342.63	5334.15	5408.92	5394.69	11544.8	6013.29
1.21_113.0350m/z	113.035	1.21112	pos	Uracil	258	Organoheterocyclic compounds	Diazines	Pyrimidines and pyrimidine derivatives	**	C00106	51.8	68.3	M+H	C4H4N2O2	3.92545	165678	144244	168358	189612	178163	7432.76	104522	31791.5	12467.1	73665.1	126282	140085	54561.3	89816.8	48209.9	128931
1.71_254.1616m/z	254.162	1.7073	pos	Arginylproline	HMDB0028717	Organic acids and derivatives	Carboxylic acids and derivatives	Amino acids, peptides, and analogues	*		51.8	64.5	M+H-H2O	C11H21N5O3	1.57054	2389.22	2284.39	2205.76	2437.12	2353.6	368.672	1245.68	631.947	1114.62	991.882	3131.25	3557.69	1481.67	1984.72	1667.16	1651.81
10.48_295.2272m/z	295.227	10.4763	pos	12,13-Epoxy-9,15-octadecadienoic acid	87400	Lipids and lipid-like molecules	Fatty Acyls	Fatty acids and conjugates	*		51.8	64.4	M+H	C18H30O3	1.47678	13372.8	13711.8	12299.2	13378.3	12594.7	2842.1	2959.01	2836.65	2442.79	3874.2	2745.78	3334.02	1954.37	3487.25	15506	2945.9
3.68_247.1295m/z	247.129	3.68277	pos	L-beta-aspartyl-L-leucine	62015	Organic acids and derivatives	Peptidomimetics	Hybrid peptides	*		51.8	64.8	M+H	C10H18N2O5	2.56122	3824.3	3444.52	3950.44	4092.73	3917.87	4436.55	3269.82	3252.7	3967.85	4015.56	4858.11	4961.56	983.178	4462.23	1271.14	6805.05
4.83_266.1658m/z	266.166	4.82625	pos	Mirtazapine	43259	Organoheterocyclic compounds	Piperazinoazepines	Unclassified		C07570	51.8	84	M+H	C17H19N3	2.45688	428.117	264.96	299.23	479.606	411.105	433.063	363.296	7227.5	24.6912	304.365	973.76	956.397	780.975	928.178	121.724	498.092
7.31_357.0616m/z	357.062	7.3089	neg	PSOROMIC ACID	43642	Unclassified	Unclassified	Unclassified			51.8	63.7	M-H	C18H14O8	0.0354213	18427.4	19867.4	18917.7	20400.1	19804.2	23913.2	19661.1	21874.8	25050.8	21041.2	19195.3	21049.4	21711.2	22563.8	23742.1	22302.9
9.65_315.2777n	338.267	9.65155	pos	6-hydroxysphingosine	53903	Lipids and lipid-like molecules	Sphingolipids	Sphingoid bases			51.8	63.8	M+H-H2O, M+Na, M+H	C18H37NO3	1.11534	188195	192600	180518	178738	197861	200320	191828	191135	163060	188528	169903	169719	158879	194860	136096	187087
0.81_203.0673m/z	203.067	0.805983	neg	γ-D-Glutamylglycine	24059	Unclassified	Unclassified	Unclassified			51.7	64.5	M-H	C7H12N2O5	-0.107443	8700.31	8961.8	9531.64	8922.7	7921.8	6494.67	4656.33	2666.36	3638.6	3998.33	4753.9	4741.36	13362.9	6714.02	2393.2	3008.41
0.83_309.1060n	308.099	0.82665	neg	N-Acetyl-a-neuraminic acid	HMDB0000773	Organic oxygen compounds	Organooxygen compounds	Carbohydrates and carbohydrate conjugates	*	C19909	51.7	59.7	M-H, 2M-H	C11H19NO9	0.0465879	354259	361954	352624	384218	385943	47283.4	210941	64438.5	32361.2	51519	678024	460883	88974	80811.9	70489.4	131629
10.50_249.1852m/z	249.185	10.498	pos	(9R,13R)-1a,1b-dinor-10,11-dihydro-12-oxo-15-phytoenoic acid	LMFA02010008	Lipids and lipid-like molecules	Fatty Acyls	Octadecanoids			51.7	64.8	M+H-H2O	C16H26O3	1.06288	34799.4	32989.7	29170.2	32331.3	32826.5	34455.1	26340.7	23857.9	26807.6	24011.7	26157.7	19606.9	17626.9	27950.6	17794.2	28960.1
10.57_281.2121m/z	281.212	10.5698	neg	13Z-Hexadecen-11-yn-1-ol	LMFA05000202	Lipids and lipid-like molecules	Fatty Acyls	Fatty alcohols			51.7	62	M+FA-H	C16H28O	-0.541325	1993.07	1986.61	2206.44	2042.19	2194.97	648.964	261.976	318.514	1364.45	10942	7068.49	7767.32	18837.3	9539.46	9014.74	1198.46
2.49_237.0872m/z	237.087	2.48842	pos	L-Formylkynurenine	HMDB0060485	Organic oxygen compounds	Organooxygen compounds	Carbonyl compounds	**	C02700	51.7	64.9	M+H	C11H12N2O4	1.09493	2696.05	2828.62	2908.59	3138.96	2820.47	1567.26	6311.51	13989.7	1543.65	10880.4	3549.7	3489.08	1583.23	10717.5	1695.63	8805.72
3.66_231.1477n	232.155	3.6623	pos	Butyryl-L-carnitine	964	Lipids and lipid-like molecules	Fatty Acyls	Fatty acid esters	*	C02862	51.7	63.4	M+H, M+Na	C11H21NO4	2.726	71335	73629.5	78002	74994.5	79945.9	3610.77	54844	12637.6	5150.07	54189	271691	176748	2812.99	47301.5	16728.7	79278.2
4.17_293.1144m/z	293.114	4.16927	neg	gamma-Glutamylphenylalanine	HMDB0000594	Organic acids and derivatives	Carboxylic acids and derivatives	Amino acids, peptides, and analogues	*		51.7	62.7	M-H	C14H18N2O5	0.450371	3786.92	3366.72	3474.42	3925.31	3662.57	232.955	7775.26	2552.16	387.013	3667.1	5793.2	4583.57	5207.57	1565.14	2582.74	860.697
8.60_381.2648m/z	381.265	8.59733	neg	1a,1b-dihomo PGF2α	36206	Unclassified	Unclassified	Unclassified			51.7	64.8	M-H	C22H38O5	0.278298	1348.53	1486.74	1413.44	1465.87	1591.46	226.236	374.431	1058.59	196.765	23520.3	2448.5	1599.64	13073.6	6986.91	4609.87	2975.3
9.78_333.2072m/z	333.207	9.78177	neg	13,14-dihydro-15-keto-PGA2	3823	Lipids and lipid-like molecules	Fatty Acyls	Eicosanoids			51.7	64.6	M-H	C20H30O4	0.236059	1846.03	1864.48	2003.49	1906.64	1868.67	147.805	820.69	1368.62	889.941	14961.3	7276.22	3043.04	7023.42	13267	3623.82	4019.79
10.95_479.3018n	480.309	10.9505	pos	LysoPE(0:0/18:1(11Z))	HMDB0011475	Lipids and lipid-like molecules	Glycerophospholipids	Glycerophosphoethanolamines	*		51.6	63.1	M+H, M+Na	C23H46NO7P	1.35293	65537.5	71947.4	66271.1	65475.4	76764.7	65724	52399.6	43734.6	62110	53366.4	54524.6	52037.4	34564.7	37909.2	25935.8	39207.1
3.41_189.1238m/z	189.124	3.40997	pos	Glycyl-Isoleucine	85755	Organic acids and derivatives	Carboxylic acids and derivatives	Amino acids, peptides, and analogues	*		51.6	64.8	M+H	C8H16N2O3	2.43123	2726.99	2463.45	2358.99	2827.84	2944.61	1768.01	2058.64	527.716	968.329	701.02	12458.1	5787.77	2646.34	3242.19	3829.01	9116.6
4.79_131.0713m/z	131.071	4.79252	neg	2-Ethyl-2-Hydroxybutyric acid	6411	Lipids and lipid-like molecules	Fatty Acyls	Fatty acids and conjugates	*		51.6	60.8	M-H	C6H12O3	-0.396209	10072	11040.7	11286.6	12493.8	11717.2	4065.88	3262.55	3396.46	3579.99	3554.15	3301.14	3933.76	3218.44	3434.12	4394.98	3506.35
5.21_205.0741n	206.082	5.21162	pos	5-Methoxyindoleacetate	7016	Organoheterocyclic compounds	Indoles and derivatives	Indolyl carboxylic acids and derivatives	**	C05660	51.6	65.2	M+H-H2O, M+H	C11H11NO3	1.1974	3749.72	3812.61	4209.74	5207.78	4603.98	959.149	1614.16	1260.74	769.365	1449.61	1726.22	915.197	995.787	1775.76	615.969	2068.35
9.48_318.2198n	319.227	9.48373	pos	15-HEPE	HMDB0010209	Lipids and lipid-like molecules	Fatty Acyls	Eicosanoids	*		51.6	62.1	M+H-H2O, M+H	C20H30O3	0.960175	2711.49	3056.19	2817.67	2940.27	2885.27	1579.47	4655.11	1953.52	1774.56	6605.48	2109.42	1661.32	27601.7	7561.62	2252.36	1703.5
0.77_215.0561n	216.063	0.773167	pos	sn-glycero-3-phosphoethanolamine	96256	Lipids and lipid-like molecules	Glycerophospholipids	Glycerophosphoethanolamines			51.5	62	M+H, M+Na, M+K	C5H14NO6P	1.21372	241246	284728	255139	255453	252218	13288.4	27591.3	14026.7	10039.4	12777.9	66512.3	59561.4	12028.3	15094.7	17723.4	29018.5
1.19_385.1292m/z	385.129	1.1916	pos	S-Adenosylhomocysteine	296	Nucleosides, nucleotides, and analogues	5'-deoxyribonucleosides	5'-deoxy-5'-thionucleosides	**	C00021	51.5	66	M+H	C14H20N6O5S	0.868764	144561	152759	126386	130353	174724	4830.24	68499.7	3024.94	11870.6	22111.9	137561	103520	14888.9	63567.4	34699.2	119403
10.34_493.3175n	494.325	10.3393	pos	PC(16:1(9E)/0:0)	LMGP01050021	Lipids and lipid-like molecules	Glycerophospholipids	Glycerophosphocholines			51.5	62.5	M+H, M+Na	C24H48NO7P	1.42259	308483	333499	291570	300854	326741	25145.8	40795.5	39353.5	6471.28	50758	48461.2	57004.1	36496.7	33664.4	34409.7	36844.4
10.60_265.2165m/z	265.217	10.5968	pos	12-hydroxy-8E,10E-heptadecadienoic acid	LMFA01050194	Lipids and lipid-like molecules	Fatty Acyls	Fatty Acids and Conjugates			51.5	63.9	M+H-H2O	C17H30O3	1.05575	2724.47	2883.62	2040.97	2625.69	2334.63	1012.58	873.531	920.065	1392.09	6387.52	4916.38	3091.85	8259.54	4968.04	2319.74	1472.35
3.96_785.1583n	786.166	3.96323	pos	Flavin adenine dinucleotide (FAD)	2302	Unclassified	Unclassified	Unclassified			51.5	68.4	M+H, M+Na	C27H33N9O15P2	1.44542	29070.8	34425.5	33694.8	34240.4	35443.8	1595.82	19141.4	5004.88	1446.13	7555.74	18698.1	20014.7	12714.6	21648.2	12403.7	10687.2
4.69_209.0455m/z	209.046	4.69105	neg	5-Hydroxyferulic acid	HMDB0035484	Phenylpropanoids and polyketides	Cinnamic acids and derivatives	Hydroxycinnamic acids and derivatives	**	C05619	51.5	60.5	M-H	C10H10O5	-0.170574	16741.4	15291.5	14868.3	18019.7	16162.9	18091.3	15125.9	16326.4	19345.2	15638.2	15578.3	15482.8	15779.2	14227.7	14782.6	15863.9
5.13_236.0928m/z	236.093	5.12903	neg	1-Carboxyethylphenylalanine	HMDB0240628	Organic acids and derivatives	Carboxylic acids and derivatives	Amino acids, peptides, and analogues			51.5	59.9	M-H	C12H15NO4	-0.0815524	37347.4	33810.5	33088.6	36642.9	34693.7	1037.31	24146.1	2132.52	2040.41	7725.78	47736	32294.6	11012.6	16096.4	7626.01	9151.6
0.83_146.1177m/z	146.118	0.829667	pos	Acetylcholine	57	Organic nitrogen compounds	Organonitrogen compounds	Quaternary ammonium salts	**	C01996	51.4	60	M+H	C7H15NO2	1.02646	83568.4	85561.3	87874.1	89775.3	83010.7	149597	28420.3	65759.7	99283.9	67524.5	38726.8	40389.6	26178.8	61110.8	22316.6	26754.9
1.33_497.1139m/z	497.114	1.33367	neg	b-D-Glucuronopyranosyl-(1->3)-a-D-galacturonopyranosyl-(1->2)-L-rhamnose	HMDB0039728	Organic oxygen compounds	Organooxygen compounds	Carbohydrates and carbohydrate conjugates			51.4	65.3	M-H2O-H	C18H28O17	-1.7079	590.423	537.032	493.172	499.819	462.602	168.049	7000.95	2319.29	601.679	2919.13	6791.03	3924.62	2304.22	1171.96	11738.9	11591.7
10.63_399.3353n	400.343	10.6311	pos	L-Palmitoylcarnitine	HMDB0000222	Lipids and lipid-like molecules	Fatty Acyls	Fatty acid esters	***	C02990	51.4	62.3	M+H, M+Na	C23H45NO4	1.14729	60666.5	71767.5	66225.4	71208.1	79480.3	407751	258112	62393.5	195218	80468.8	706120	367447	73483	135995	33846	97383.2
2.95_219.1343m/z	219.134	2.9545	pos	Serinyl-Isoleucine	85935	Organic acids and derivatives	Carboxylic acids and derivatives	Amino acids, peptides, and analogues	*		51.4	63.6	M+H	C9H18N2O4	1.71579	2054.74	1997.39	1866.24	2009.41	2336	1241.3	1330.74	474.864	1183.27	816.146	7775.71	4262.55	3553.97	3352.2	4404.1	3532.67
4.18_182.0458m/z	182.046	4.1801	neg	4-Pyridoxic acid	239	Organoheterocyclic compounds	Pyridines and derivatives	Pyridinecarboxylic acids and derivatives	**	C00847	51.4	60.1	M-H	C8H9NO4	-0.463201	278.215	258.941	237.477	248.147	275.191	2498.51	1377.12	2117.88	4922.45	1773.54	875.628	1192.38	996.642	2572.13	777.585	910.527
4.19_252.0877m/z	252.088	4.19262	neg	N-lactoyl-Tyrosine	HMDB0062177	Organic acids and derivatives	Carboxylic acids and derivatives	Amino acids, peptides, and analogues			51.4	59.7	M-H	C12H15NO5	-0.00820796	13026.1	11472.1	11390.6	11953.7	12301.9	61.1428	6546.89	276.227	171.283	1320.19	10921.9	9845.13	1630.8	4495.83	1792.4	2969.97
0.77_132.0302m/z	132.03	0.769183	neg	D-Aspartic acid	HMDB0006483	Organic acids and derivatives	Carboxylic acids and derivatives	Amino acids, peptides, and analogues	**	C00402	51.3	62.3	M-H	C4H7NO4	-0.542235	128131	145839	173259	150309	158159	20732.6	133656	52914.9	49651.6	86254.7	97748.6	125619	102865	82093.8	53968.9	115883
0.91_160.1334m/z	160.133	0.911433	pos	METHACHOLINE	43545	Organic nitrogen compounds	Organonitrogen compounds	Quaternary ammonium salts		C07471	51.3	66.8	M+H	C8H17NO2	1.32439	459039	429480	415203	420142	501254	59302.9	32422.2	47473.3	71542	31000.3	74176	35845.5	15600.7	45203	19901.6	25254.9
1.30_119.0495m/z	119.05	1.29677	pos	Benzofuran	70116	Organoheterocyclic compounds	Benzofurans	Unclassified		C14512	51.3	61.1	M+H	C8H6O	3.1035	37838.7	34593.8	40516.6	40227.6	42070.5	6818.97	32848.5	8900.51	6819.19	15152.2	34992.4	36950	32812.6	25705.9	23972.8	18444.2
11.22_302.2249n	303.232	11.2159	pos	Oryzalexin A	HMDB0301859	Unclassified	Unclassified	Unclassified			51.3	60.6	M+H-H2O, M+H	C20H30O2	0.89698	64816.6	63063.4	63447.2	63753.3	62957.9	129520	528258	168683	177468	314247	45650.2	47906.1	1.65311e+06	300562	104548	22387.6
11.30_417.3369m/z	417.337	11.3044	pos	1alpha,25-Dihydroxy-previtamin D3	LMST03020660	Lipids and lipid-like molecules	Sterol Lipids	Secosteroids			51.3	66.7	M+H	C27H44O3	1.48989	4910.52	4732.22	4607.29	4364.3	5216.42	5.88962e-06	397.643	515.751	5.88962e-06	824.652	1279.02	1340.83	641.931	757.411	778.535	1139.97
12.20_259.2060m/z	259.206	12.2014	pos	(E,E)-11,13-Octadecadien-9-ynoic acid	HMDB0034382	Lipids and lipid-like molecules	Fatty Acyls	Fatty acids and conjugates	*		51.3	62.2	M+H-H2O	C18H28O2	1.18553	21651.6	20726.7	21315.3	18315.5	19798.6	22331.3	20670.7	21516.7	23796.8	22299	19975.7	18774.4	16253	20755.1	11529.3	19112.3
14.88_384.3396n	367.336	14.8782	pos	Vitamin D3	165	Lipids and lipid-like molecules	Steroids and steroid derivatives	Vitamin D and derivatives	**	C05443	51.3	62	M+H-H2O, M+H	C27H44O	0.990118	362097	346123	370683	379897	343551	13871.3	2185.72	5667.69	31390.3	11463.4	4053.98	2699.35	4477.98	10979	1024.47	2162.19
2.27_277.0862m/z	277.086	2.27038	neg	Glutamylmethionine	HMDB0028825	Organic acids and derivatives	Carboxylic acids and derivatives	Amino acids, peptides, and analogues	*		51.3	64.4	M-H	C10H18N2O5S	-0.448632	301.137	293.289	246.073	322.522	236.98	5.88962e-06	8683.74	1491.61	158.631	2300.69	6304.34	4547.22	9970.29	2117.78	3594.71	958.449
3.61_238.1079m/z	238.108	3.60977	pos	Salsoline-1-carboxylate	HMDB0013067	Organoheterocyclic compounds	Tetrahydroisoquinolines	Unclassified	*		51.3	63.9	M+H	C12H15NO4	2.34166	2551.89	3155.42	2683.49	2626.62	3081.19	2071.99	1045.8	176.393	527.797	328.779	826.646	3098.62	216.567	3301.21	32.5202	2079.67
5.12_212.0918m/z	212.092	5.12455	pos	6-Maleimidocaproic acid	24061	Unclassified	Unclassified	Unclassified			51.3	60.8	M+H	C10H13NO4	0.537478	682.807	650.192	664.186	873.513	796.861	24557	2723.9	7203.71	22519.7	7217.05	1468.71	1661.85	4600.89	7418.32	2249.35	1609.36
9.76_318.3007m/z	318.301	9.7606	pos	Phytosphingosine	7066	Organic nitrogen compounds	Organonitrogen compounds	Amines	**	C12144	51.3	62.7	M+H	C18H39NO3	1.23311	2683.18	2470	2954.58	2669.66	2428.92	2885.31	10331.1	4961.71	3705.25	9055.19	14665.3	11757.3	13416.1	5407.24	2692.68	4899.55
0.77_125.0146n	124.007	0.769183	neg	Taurine	31	Organic acids and derivatives	Organic sulfonic acids and derivatives	Organosulfonic acids and derivatives	**	C00245	51.2	62.9	M-H, 2M-H	C2H7NO3S	-0.766634	953169	991136	1.0157e+06	1.07995e+06	1.03387e+06	78285.5	595427	190673	109056	315390	785632	583437	328261	442477	199841	503876
1.19_248.1496m/z	248.15	1.1916	pos	(R)-3-hydroxybutyrylcarnitine	HMDB0062735	Lipids and lipid-like molecules	Fatty Acyls	Fatty acid esters	***		51.2	60.1	M+H	C11H21NO5	1.42267	158501	180835	170679	166288	171258	5122.59	42698.7	6539.06	9279.34	12543.3	347112	177448	6128.86	58448	30490.1	109721
10.67_291.1602m/z	291.16	10.6685	neg	Botrydial	LMPR0103640001	Lipids and lipid-like molecules	Prenol lipids	Isoprenoids			51.2	60.6	M-H2O-H	C17H26O5	0.0715763	10687.4	10555.9	9703.48	9916.57	9539.18	11883.2	9965.37	10724.3	12330.8	9272.47	9551.13	9787.25	10559.8	10424.4	10070.5	10925.8
5.04_336.1669m/z	336.167	5.04318	pos	Isopentenyl adenosine	64086	Unclassified	Unclassified	Unclassified			51.2	63.7	M+H	C15H21N5O4	0.691723	2711.39	2724.31	2564.75	3391.73	2709.41	5.88962e-06	223.969	113.452	5.88962e-06	248.834	354.112	406.153	218.644	148.262	5.88962e-06	200.312
1.45_379.1056n	380.113	1.4499	pos	S-Lactoylglutathione	HMDB0001066	Organic acids and derivatives	Carboxylic acids and derivatives	Amino acids, peptides, and analogues	**	C03451	51.1	62.8	M+H, M+Na	C13H21N3O8S	1.65189	399417	395043	386896	400869	395601	120821	30651.4	493.982	11432.9	1041.04	23019.3	98674.8	1934.5	42517.8	325.031	322325
11.27_636.3878m/z	636.388	11.2719	neg	PC(18:1(9Z)/4:0)	LMGP01010916	Lipids and lipid-like molecules	Glycerophospholipids	Glycerophosphocholines			51.1	61	M+FA-H	C30H58NO8P	-0.652122	50482.5	54971.7	48045.3	50864.5	47863.8	345.573	54.158	56.4278	40.1786	15.4262	17.6971	5.88962e-06	31.4772	5.88962e-06	41.5026	18.192
11.89_523.3645n	524.372	11.891	pos	PC(0:0/18:0)[S]	40343	Unclassified	Unclassified	Unclassified			51.1	58.8	M+H, M+Na	C26H54NO7P	1.27094	1.34475e+06	1.31089e+06	1.43306e+06	1.50976e+06	1.49036e+06	1.12898e+06	474809	444724	331472	489676	443158	532704	503441	513286	464691	393710
0.69_204.1346m/z	204.135	0.690133	pos	Glycyl-Lysine	85756	Organic acids and derivatives	Carboxylic acids and derivatives	Amino acids, peptides, and analogues	*		51	59.9	M+H	C8H17N3O3	1.59753	1973.92	1894.57	1994.15	2185.97	1985.32	1385.83	7164.07	1617.39	1885.46	1632.51	7167.71	6495.39	15354.1	3808.67	15350.4	4113.85
0.71_309.1659m/z	309.166	0.710867	pos	1-[(5-Amino-5-carboxypentyl)amino]-1-deoxyfructose	HMDB0034879	Organic oxygen compounds	Organooxygen compounds	Carbohydrates and carbohydrate conjugates			51	61.3	M+H	C12H24N2O7	0.991991	5913.37	6689.44	6060.85	6646.87	6016.31	3972.99	5091.54	12376.6	306.96	8723.81	2471.69	3380.55	6271.08	3080.39	5658.48	3244.76
10.61_444.3330m/z	444.333	10.6085	neg	Palmitoylcarnitine	LMFA07070004	Benzenoids	Phenols	Benzenediols	**	C00547	51	59.4	M+FA-H	C23H45NO4	-0.0722658	2330.32	2074.09	2181.75	2301.29	2126.97	19733.2	8999.17	2464.96	8417.65	3981.34	30009.1	16312.4	3341	4582.68	2450.22	4009.36
11.09_436.2832m/z	436.283	11.0878	neg	LysoPE(P-16:0/0:0)	HMDB0011152	Lipids and lipid-like molecules	Glycerophospholipids	Glycerophosphoethanolamines	*		51	60	M-H	C21H44NO6P	-0.339221	10594.3	9829.69	10151.9	9331.41	8587.83	90460.4	201460	138159	53092.2	130326	226859	167768	110976	93876.6	132840	67077.9
12.86_330.2773n	313.274	12.8612	pos	1-Monopalmitin	24076	Lipids and lipid-like molecules	Glycerolipids	Monoradylglycerols	*		51	61.9	M+H-H2O, M+H	C19H38O4	0.735523	5872.26	3528.7	5887.84	4739.01	3498.07	154.224	1089.35	66.4561	121.206	367.335	14420.5	5302.37	760.866	4572.03	849.63	1298.15
5.13_267.0510m/z	267.051	5.12903	neg	Diphenol glucuronide	HMDB0059998	Organic oxygen compounds	Organooxygen compounds	Carbohydrates and carbohydrate conjugates	*		51	58.5	M-H2O-H	C12H14O8	-0.0542669	4916.98	4296.1	4402.6	4689.5	4459.16	5836.61	4866.22	5300.42	6246.1	5340.15	5258.13	5230.51	5462.07	5663.07	5396.51	5427.22
8.51_336.2303n	354.262	8.51448	pos	PGB1	408	Lipids and lipid-like molecules	Fatty Acyls	Eicosanoids	*	C00959	51	61.7	M+H, M+NH4	C20H32O4	0.843349	6202.57	6355.77	6389.11	6201.08	7328.21	5052.55	5323.22	5306.9	6862.78	8211.84	11574.9	16194.8	7878.59	8965.09	4900.72	6427.63
0.79_130.0266n	148.061	0.791433	pos	Citraconic acid	HMDB0000634	Lipids and lipid-like molecules	Fatty Acyls	Fatty acids and conjugates	**	C02226	50.9	60.6	M+H, M+NH4	C5H6O4	0.286042	819325	838943	831049	821875	923165	147102	431513	215905	111016	379138	666700	496410	218555	308459	140920	500181
0.81_127.0392m/z	127.039	0.809917	pos	4-HYDROXY-6-METHYLPYRAN-2-ONE	44653	Unclassified	Unclassified	Unclassified			50.9	59.9	M+H	C6H6O3	2.13289	23633.2	23574.3	23850.9	24015.9	25761.6	24315.6	21820.6	31407.4	27583.9	25309.3	23130.5	23212.2	20862.6	25604.3	15803	24364.6
10.09_372.3110m/z	372.311	10.0871	pos	(±)-Myristoylcarnitine	85175	Unclassified	Unclassified	Unclassified			50.9	60.1	M+H	C21H41NO4	0.409885	16689.5	18284.6	18734.1	17556.6	16096.6	18768.1	32902.6	8792.27	12077.5	14028.9	149567	97767.7	10699.9	39989.8	8943.23	29403.8
10.56_476.2782m/z	476.278	10.5625	neg	LysoPE(0:0/18:2(9Z,12Z))	HMDB0011477	Lipids and lipid-like molecules	Glycerophospholipids	Glycerophosphoethanolamines	*		50.9	60.1	M-H	C23H44NO7P	-0.0972983	8322.33	8557.96	8841.7	8786.02	8923.65	76896.9	17561.4	35412.7	29351.9	26831.3	13572.5	15111.7	13771.5	11557.8	16100.9	12540.1
11.17_104.1075m/z	104.107	11.1717	pos	Choline	56	Organic nitrogen compounds	Organonitrogen compounds	Quaternary ammonium salts	**	C00114	50.9	62.4	M+H	C5H13NO	4.67165	3072.79	3492.27	3466.1	3416.66	3344.93	1510.95	1264.35	1176.42	682.726	1250.31	1191.84	1337.77	917.9	876.663	882.666	969.258
0.81_130.0621m/z	130.062	0.805983	neg	3-Guanidinopropanoate	44712	Organic nitrogen compounds	Organonitrogen compounds	Guanidines	*	C03065	50.8	60.3	M-H	C4H9N3O2	-0.519729	16800.1	18003.8	17498	17606.7	19374.1	9096.65	3354.92	2449.04	5877.58	3921.62	3869.44	4131.38	2344.82	4206.8	2795.99	8078.63
0.91_162.0763m/z	162.076	0.911433	pos	Acetylhomoserine	3282	Organic acids and derivatives	Carboxylic acids and derivatives	Amino acids, peptides, and analogues	*		50.8	57.4	M+H	C6H11NO4	1.3624	265229	281554	274004	272166	270528	20704.7	35765	21882.7	33050.1	24377.4	98545.3	85770.7	22713.9	49288.6	18708.8	32613.5
1.67_217.1319n	218.139	1.66957	pos	(±)-Propionylcarnitine	85176	Unclassified	Unclassified	Unclassified			50.8	58.2	M+H, M+Na, M+K	C10H19NO4	2.14022	86745.5	92698.3	118329	120757	110232	330948	45584	121574	325787	92801.7	171660	102943	45291.6	93427.8	64030.1	224892
10.15_538.3151m/z	538.315	10.1511	neg	PE(19:1(9Z)/0:0)	LMGP02050019	Lipids and lipid-like molecules	Glycerophospholipids	Glycerophosphoethanolamines			50.8	59.8	M+FA-H	C24H48NO7P	0.106561	30758.5	30829.8	28030.5	30044.4	26356.4	2732.83	5397.9	3774.84	938.576	7603.18	10152.9	10447.6	8951.78	5037.75	5537.79	6116.31
11.11_249.1852m/z	249.185	11.1054	pos	4,8,12,16-hexadecatetraenoic acid	LMFA01030165	Lipids and lipid-like molecules	Fatty Acyls	Fatty Acids and Conjugates			50.8	60.3	M+H	C16H24O2	1.11602	20793.4	21512.4	20460.7	19764.1	20839.1	30446.7	18795.3	22079.8	26015.4	21630.1	19656	23653.4	17164.1	21329.1	15608.7	27400.3
0.69_162.1007n	163.108	0.690133	pos	2-Deoxystreptamine	65799	Unclassified	Unclassified	Unclassified			50.7	58.4	M+H-H2O, M+H	C6H14N2O3	1.7471	11582	11221.5	11804.5	13050	11779	306.266	3282.46	1537.41	627.165	1982.46	4248.23	6548.45	2299.09	3139.31	3787.7	6629.45
1.27_134.0472m/z	134.047	1.26567	neg	Adenine	85	Organoheterocyclic compounds	Imidazopyrimidines	Purines and purine derivatives	**	C00147	50.7	59.9	M-H	C5H5N5	-0.179812	4361.99	4683.68	4428.58	4547.4	4611.86	1357.14	1587.88	1425.17	1614.21	2246.33	1483.14	1762.15	2067.38	1835.08	3257.35	1747.08
1.27_188.0564m/z	188.056	1.26567	neg	N-Acetyl-L-glutamic acid	3325	Organic acids and derivatives	Carboxylic acids and derivatives	Amino acids, peptides, and analogues	**	C00624	50.7	57.1	M-H	C7H11NO5	0.00580627	4076.65	4215.08	4491.76	4769.23	4990.25	235.904	2031.28	648.548	226.566	1169.38	6530.45	3151.2	579.62	1035.06	1272.69	2573.38
1.45_239.1038m/z	239.104	1.4499	pos	Tyrosylglycine	HMDB0029105	Organic acids and derivatives	Carboxylic acids and derivatives	Amino acids, peptides, and analogues	*		50.7	63.6	M+H	C11H14N2O4	4.79301	6707.36	7380.9	6699.38	7193.79	7439.98	843.15	5322.54	911.767	2583.94	1094.63	14752.9	12655	10982.5	5292.2	23199.1	7262.99
11.09_344.2351n	343.228	11.0878	neg	(+/-)-14-HDoHE	LMFA04000030	Lipids and lipid-like molecules	Fatty Acyls	Docosanoids			50.7	57.4	M-H2O-H, M-H	C22H32O3	0.0141258	29531	28497.4	27876.9	28851.2	25487.7	27928.8	65835.2	53238.6	62383.4	91536.7	3521.33	10434.7	327437	57827.1	29216.7	1116.03
11.13_363.2542m/z	363.254	11.1311	neg	Misoprostol	HMDB0015064	Lipids and lipid-like molecules	Fatty Acyls	Eicosanoids			50.7	58.3	M-H2O-H	C22H38O5	0.176758	747.333	597.025	461.848	750.354	454.784	233.814	132.135	674.486	49.6263	1915.82	55.1076	58.0305	11667.1	996.032	352.614	56.3855
11.97_299.2585m/z	299.258	11.9734	pos	cis-9,10-Epoxystearic acid	36008	Unclassified	Unclassified	Unclassified			50.7	59	M+H	C18H34O3	1.3625	11603.3	11269.5	12481.9	13057.5	12511.9	9841.43	8109.05	11771.7	10378.1	23576.8	8019.39	15810.9	9005.59	13132.9	98942.2	8594.15
12.22_262.2300n	280.264	12.2234	pos	Farnesyl acetone	265036	Unclassified	Unclassified	Unclassified			50.7	58.7	M+H, M+NH4, M+H-H2O	C18H30O	1.17626	360008	335080	340861	339829	345375	397792	340511	363465	442195	402225	402427	429412	300470	376681	239615	343854
4.53_160.1335m/z	160.134	4.53363	pos	DL-2-Aminooctanoic acid	5923	Organic acids and derivatives	Carboxylic acids and derivatives	Amino acids, peptides, and analogues	*		50.7	83.2	M+H	C8H17NO2	1.97918	5806.36	5881.9	7146.81	6129.47	6557.88	4166.69	3040.94	3931.57	4260.56	3735.71	4535.93	4132.84	2076.04	4066.62	1869.74	4092.96
4.73_186.1135m/z	186.114	4.72777	neg	8-Amino-7-oxononanoic acid	HMDB0240687	Lipids and lipid-like molecules	Fatty Acyls	Fatty acids and conjugates	**	C01092	50.7	64.1	M-H	C9H17NO3	-0.309569	178122	168189	174721	188800	180519	229228	181618	208217	250802	212581	191187	197337	189243	215761	203169	194798
4.89_209.0690n	192.066	4.89478	pos	N-Benzyloxycarbonylglycine	66027	Unclassified	Unclassified	Unclassified			50.7	58.9	M+H-H2O, M+H	C10H11NO4	0.940304	667.435	600.292	471.676	495.183	600.019	2675.37	1549.91	2223.42	4302.95	1379	911.362	771.331	1265.4	1508.55	467.714	1088.12
6.29_288.2173m/z	288.217	6.2872	pos	(±)-Octanoylcarnitine	85173	Unclassified	Unclassified	Unclassified			50.7	58.3	M+H	C15H29NO4	1.1054	2597.11	2539.26	2404.69	3064.49	1878.84	3084.28	3195	3964.46	3444.41	11623	9814.84	16515.7	741.558	4862.31	1744.3	12777.3
1.47_103.0400m/z	103.04	1.46732	neg	D(-)-β-hydroxy butyric acid	125	Unclassified	Unclassified	Unclassified			50.6	56	M-H	C4H8O3	-0.426594	1554.66	1751.38	1821.79	1869.07	1702.25	856.016	635.053	1153.62	1017.55	1123.76	5159.93	1791.99	455.855	1416.52	1759.88	1946.2
1.52_260.1974m/z	260.197	1.51642	pos	Leucyl-Lysine	85837	Organic acids and derivatives	Carboxylic acids and derivatives	Amino acids, peptides, and analogues	*		50.6	60.3	M+H	C12H25N3O3	1.95405	816.631	985.75	1196.46	883.085	866.551	7581.87	4204.81	8019.33	15307.9	5207.56	2468.35	2282.23	8188.63	5431.87	11095.4	1344.73
10.71_316.2043n	317.212	10.7058	pos	19-Hydroky-all-trans-retinoic acid	41519	Unclassified	Unclassified	Unclassified			50.6	58.6	M+H, M+Na	C20H28O3	1.59344	19109.1	21588.7	18764.6	18957.2	20187.2	1564.8	948.709	1334	1401.66	1716.13	2701.77	1369.23	1677.76	4408.66	1471.03	2797.05
11.28_579.3544n	580.362	11.283	pos	POB-PC	LMGP20010021	Lipids and lipid-like molecules	Glycerophospholipids	Oxidized glycerophospholipids			50.6	60.2	M+H, M+Na	C28H54NO9P	1.31805	330655	312822	318597	322999	337301	11268.6	1383.55	2130.88	3946.87	2249.68	2194.38	1681.84	893.589	1967.64	1182.96	532.593
15.22_294.2431m/z	294.243	15.2183	pos	19-Norandrosterone	HMDB0002697	Lipids and lipid-like molecules	Steroids and steroid derivatives	Estrane steroids	*		50.6	58	M+NH4	C18H28O2	1.39813	149931	159432	183592	190338	192834	170483	152983	189244	186096	183763	181299	157209	143036	188670	127021	179827
4.57_183.0662m/z	183.066	4.5673	neg	3,4-Methylenepimelic acid	HMDB0059730	Lipids and lipid-like molecules	Fatty Acyls	Fatty acids and conjugates	*		50.6	55.2	M-H	C9H12O4	-0.451946	66130.7	69303.5	68807.3	73566.6	74439	75087.2	73779.5	76368.3	87944.3	73868.5	76611.1	82999.2	79933.6	82459.1	79580.3	83027.8
4.92_173.0818m/z	173.082	4.92048	neg	Suberic acid	4243	Lipids and lipid-like molecules	Fatty Acyls	Fatty acids and conjugates	*	C08278	50.6	57.8	M-H	C8H14O4	-0.501838	31420.2	30898	31867	33181.4	33390.1	35206.4	28369.4	32829.4	39128.8	33042.1	29163	31621.8	30571.8	33299.8	33016	31460.1
9.38_177.0548m/z	177.055	9.37742	pos	(-)-trans-3,4-Dihydro-4,8-dihydroxy-3-methyl-1H-2-benzopyran-1-one	HMDB0030765	Organoheterocyclic compounds	Benzopyrans	2-benzopyrans	*		50.6	57.3	M+H-H2O	C10H10O4	1.06298	4743.56	4642.42	4919.97	5261.75	5396.02	4453.36	3898.71	4716.86	5422	3401	4875.08	4638.64	3724.75	4337.74	3419.55	4943.23
9.41_267.1237m/z	267.124	9.41107	neg	3-carboxy-4-methyl-5-pentyl-2-furanpropanoic acid	HMDB0061643	Lipids and lipid-like molecules	Fatty Acyls	Fatty acids and conjugates	*		50.6	56.5	M-H	C14H20O5	-0.523342	166.712	174.286	191.213	229.66	219.608	6710.29	35279	28351.1	11135.6	20723	5973.05	16209.6	6884.39	12057.8	16403.4	14115.3
0.63_245.2338m/z	245.234	0.626517	pos	N1-Acetylspermine	3369	Organic acids and derivatives	Carboxylic acids and derivatives	Carboxylic acid derivatives	*	C02567	50.5	59.9	M+H	C12H28N4O	1.02828	1144.04	1170.36	926.999	1256.73	840.855	3706.16	273.156	1042.35	724.746	982.459	362.14	1677.32	5.88962e-06	862.039	0.680587	71.1693
0.77_300.0488m/z	300.049	0.769183	neg	N-Acetylglucosamine 6-phosphate	HMDB0002817	Organic oxygen compounds	Organooxygen compounds	Carbohydrates and carbohydrate conjugates	*		50.5	56	M-H	C8H16NO9P	-0.71356	34921.4	33683.1	32531	35602.3	33304.5	4429.78	145693	40695.1	11634.6	97552.4	233495	286955	66588.2	96465.2	50800.8	178446
0.79_426.0886n	427.096	0.791433	pos	Cysteineglutathione disulfide	HMDB0000656	Organic acids and derivatives	Carboxylic acids and derivatives	Amino acids, peptides, and analogues	*		50.5	65.7	M+H, M+K	C13H22N4O8S2	1.68351	45564.4	59318.9	57037.5	59729	62151.1	1586.21	70184.2	132532	4182.45	102218	108827	32400.3	42053.6	18803.4	55298.7	14191.1
0.85_262.0804n	263.088	0.84955	pos	L-beta-aspartyl-L-glutamic acid	62013	Organic acids and derivatives	Peptidomimetics	Hybrid peptides	*		50.5	59.8	M+H, M+Na	C9H14N2O7	1.2432	7422.04	8805.29	10574.9	8615.18	7811.34	6827.12	10889.1	2985.52	5204.1	6609.48	11662.7	9725.92	4513.84	9479.7	2413.24	14998
0.85_347.0632n	348.071	0.84955	pos	Adenosine 2'-phosphate	62385	Organic oxygen compounds	Organooxygen compounds	Carbohydrates and carbohydrate conjugates	*	C00946	50.5	57.3	M+Na, M+K, M+H	C10H14N5O7P	0.221242	1.02586e+06	968605	929395	1.00632e+06	1.05524e+06	150106	52701.6	21633	296791	51127.7	147139	78839.8	26479.3	110400	20245.3	40280.2
0.87_134.0272m/z	134.027	0.870567	pos	Thioproline	HMDB0062164	Organic acids and derivatives	Carboxylic acids and derivatives	Amino acids, peptides, and analogues			50.5	63.6	M+H	C4H7NO2S	1.65157	42888.5	46558	45899.9	44678.1	47012	1487.53	159897	10435.3	3215.24	7676.04	232085	171908	47459.2	45578.4	11290.6	43231.4
0.87_275.0885m/z	275.089	0.868767	neg	(2S,3'S)-alpha-Amino-2-carboxy-5-oxo-1-pyrrolidinebutanoic acid	HMDB0039110	Organic acids and derivatives	Carboxylic acids and derivatives	Amino acids, peptides, and analogues			50.5	53.7	M+FA-H	C9H14N2O5	0.205871	31987.5	29518.1	30065.1	30176.4	34572.1	4288.2	59291.1	45239.4	9563.11	46315.6	21647.8	14283.9	31917	12831.6	16326.9	26447.4
1.17_338.1021m/z	338.102	1.17043	pos	S-Hydroxymethylglutathione	HMDB0004662	Organic acids and derivatives	Carboxylic acids and derivatives	Amino acids, peptides, and analogues	**	C14180	50.5	64.8	M+H	C11H19N3O7S	1.48726	5982.29	4077.25	4474.65	6170.51	6428.4	2592.96	5.88962e-06	5.88962e-06	73.7411	9.6634	3725.41	3651.36	5.88962e-06	1579.71	5.88962e-06	10113.9
11.06_260.2012m/z	260.201	11.062	pos	Venlafaxine	HMDB0005016	Benzenoids	Phenol ethers	Anisoles		C07187	50.5	58	M+H-H2O	C17H27NO2	1.13986	3886.8	4153.26	4135.11	4304.05	4077.12	5337.04	3832.31	4423.98	4776.36	4057.45	4011.41	4490.61	3425.08	4743.29	3115.18	5732.22
11.59_481.3175n	482.325	11.5907	pos	PE(0:0/18:0)	LMGP02050038	Lipids and lipid-like molecules	Glycerophospholipids	Glycerophosphoethanolamines	*		50.5	58.1	M+H, M+Na	C23H48NO7P	1.36943	26689.7	28388	28074.1	30556.5	27195.6	12731.1	22791.9	20413.9	9999.22	27624.6	11884.9	16815.7	21671.4	15918.5	12611.8	9331.09
11.61_279.2322m/z	279.232	11.6131	pos	Gamma-Linolenic acid	HMDB0003073	Lipids and lipid-like molecules	Fatty Acyls	Lineolic acids and derivatives	***	C06426	50.5	57.8	M+H	C18H30O2	1.13249	63235.2	61894.8	65277.2	62755.6	61154	13275.8	11625.6	12953	13286.5	13893.5	13690.5	11507.8	9923.09	14301.1	8107.46	11566.2
12.75_329.2478m/z	329.248	12.752	pos	10,13,16-Docosatriynoic acid	74286	Lipids and lipid-like molecules	Fatty Acyls	Fatty Acids and Conjugates			50.5	58.8	M+H	C22H32O2	0.836954	295.058	264.88	332.105	284.649	149.519	1161.63	11180.5	7477.33	2235.08	7080.73	3848.09	6718.13	4329.92	5774.83	4946.26	2420.04
8.10_235.0975m/z	235.097	8.09568	neg	DIHYDRO-β-TUBAIC ACID	44213	Unclassified	Unclassified	Unclassified			50.5	56.3	M-H	C13H16O4	-0.493947	7386.07	6786.71	7541.04	7680.51	7772.41	7788.76	8188	8045.28	9251.66	7575.57	7235.96	8338.88	6309.95	7574.62	7904.47	8137.43
0.69_270.1200m/z	270.12	0.690133	pos	Asparaginyl-Histidine	85648	Organic acids and derivatives	Carboxylic acids and derivatives	Amino acids, peptides, and analogues	*		50.4	66.3	M+H	C10H15N5O4	1.2293	960.277	926.491	815.731	985.558	967.731	553.516	1111.94	264.95	849.1	686.898	3995.68	2791.9	2331.53	2480.61	1576.58	1619.66
0.77_260.0301n	283.019	0.773167	pos	D-Mannose 6-phosphate	5987	Organic oxygen compounds	Organooxygen compounds	Carbohydrates and carbohydrate conjugates	**	C00275	50.4	56.4	M+Na, M+K	C6H13O9P	1.30169	40824.8	43876	36329.6	39629.7	43990.5	31417.5	66730.8	122750	16433.4	87026.8	33965.3	89285.8	125269	65607.6	34928.4	66080.6
0.77_338.9887m/z	338.989	0.769183	neg	D-myo-Inositol-2,4-diphosphate	45098	Unclassified	Unclassified	Unclassified			50.4	54.5	M-H	C6H14O12P2	-0.191691	601881	673176	685833	688598	714105	1.10305e+06	430914	555746	698234	679658	510556	303973	436752	468994	183959	340156
1.68_219.0775m/z	219.078	1.67827	neg	gamma-Glutaminyl-4-hydroxybenzene	HMDB0029451	Organic acids and derivatives	Carboxylic acids and derivatives	Amino acids, peptides, and analogues	*		50.4	54.9	M-H2O-H	C11H14N2O4	-0.0519947	2030.61	2243.65	2094.06	2211.86	2108.12	1128.67	2222.29	3019.1	1121.35	2439.76	1340.92	2642.45	2876.23	4291.09	2037.79	2704.25
1.87_239.1031m/z	239.103	1.87408	pos	Glycyl-Tyrosine	85762	Organic acids and derivatives	Carboxylic acids and derivatives	Amino acids, peptides, and analogues	*		50.4	58.1	M+H	C11H14N2O4	1.86409	2180.12	2205.86	2379.51	2296.31	2162.48	493.466	1262.15	404.509	512.596	515.62	3426.49	2548.92	1545.45	1469.81	2851.24	2082.38
10.40_335.2229m/z	335.223	10.4002	neg	Isoprostane F2alpha-I	HMDB0243554	Lipids and lipid-like molecules	Fatty Acyls	Eicosanoids			50.4	57.3	M-H2O-H	C20H34O5	0.280418	9932.6	9803.58	9693.22	9840.18	11155.5	2806.21	4802.69	6253.49	6241.62	11757	1800.57	1555.86	31729.7	10246.5	5728.17	972.947
10.79_291.1952m/z	291.195	10.7913	pos	Corchorifatty acid A	HMDB0032664	Lipids and lipid-like molecules	Fatty Acyls	Lineolic acids and derivatives	*		50.4	58.2	M+H-H2O	C18H28O4	-0.914591	10831.2	8731.15	8121.76	7970.8	9248.27	22188.9	10406.1	13926.6	14431.9	7805.34	6505.85	7184.93	7789.07	8635.03	6730.82	8936.91
3.91_182.0579n	181.051	3.90813	neg	Hydroxyphenyllactic acid	34515	Phenylpropanoids and polyketides	Phenylpropanoic acids	Unclassified	*	C03672	50.4	54	M-H, 2M-H, M-H2O-H	C9H10O4	-0.0542735	17865.4	18670.6	17609.5	18746.4	22603.6	4990.95	8336.17	5133.6	3693.37	5098.14	6848.26	4068.29	10383.9	22039	9716.08	8794.43
3.96_118.0655m/z	118.066	3.96323	pos	Indole	HMDB0000738	Organoheterocyclic compounds	Indoles and derivatives	Indoles	***	C00463	50.4	56.8	M+H	C8H7N	3.37747	14837.9	15249.2	14400.5	16453.5	15447.6	11312.1	10509.9	10838.4	10584.3	11071.4	12330.7	12178	9011.34	9920.87	7707.14	10189.9
7.42_401.0876m/z	401.088	7.41842	neg	Dihydrohydroxy-O-methylsterigmatocystin	HMDB0033659	Phenylpropanoids and polyketides	Sterigmatocystins	Unclassified			50.4	55.7	M+FA-H	C19H16O7	-0.509335	104071	95195.8	96823.8	104994	97844.8	108796	97012.5	104626	121753	103126	98921	100193	102683	103042	114666	118879
9.21_581.2406m/z	581.241	9.212	neg	Biliverdin	HMDB0001008	Organoheterocyclic compounds	Tetrapyrroles and derivatives	Bilirubins	**	C00500	50.4	56.1	M-H	C33H34N4O6	0.106465	3741.67	3389.67	3613.45	4027.82	4226.94	1614.21	15504.2	3174.93	924.554	4420.19	46953.9	19699.6	3305.79	5895.04	2068.07	25241.7
0.81_325.1014n	326.109	0.809917	pos	N-Glycoloyl-neuraminate	63227	Organic oxygen compounds	Organooxygen compounds	Carbohydrates and carbohydrate conjugates	**	C03410	50.3	60.5	M+H, M+Na	C11H19NO10	1.69923	81899	99344.2	99742.3	89755.2	95240.5	136.09	193.595	766.26	53.3648	94.2289	5.88962e-06	110.882	87.6782	371.707	214.075	157.867
1.19_290.1349m/z	290.135	1.1916	pos	Ophthalmic acid	HMDB0005765	Organic acids and derivatives	Carboxylic acids and derivatives	Amino acids, peptides, and analogues	*		50.3	56.8	M+H	C11H19N3O6	0.918224	9563.24	9785.9	10087.4	9595.25	9228.96	30436	15637	15402.4	55221.6	12841.6	66652.3	30046.3	8687.46	23401.1	23965	81036.3
1.67_413.2038m/z	413.204	1.66957	pos	Deoxypyridinoline	HMDB0000569	Organic acids and derivatives	Carboxylic acids and derivatives	Amino acids, peptides, and analogues	*		50.3	58.5	M+H	C18H28N4O7	1.87776	1819.56	1962.78	2200.46	2183.3	1964.57	4448.55	21888.1	22980.3	4871.96	11333.8	2233	1818.53	39443.3	5985.44	19246.8	2965.54
1.82_303.1461m/z	303.146	1.82372	pos	Histidylphenylalanine	HMDB0028892	Organic acids and derivatives	Carboxylic acids and derivatives	Amino acids, peptides, and analogues	*		50.3	59.9	M+H	C15H18N4O3	3.00492	419.941	405.303	479.71	563.401	562.261	1161.64	950.689	105.775	1265.58	788.622	1711.45	1585.97	1972.47	1492.94	6418.36	2459.4
2.50_129.0193m/z	129.019	2.49533	neg	2-Hydroxyglutaric acid lactone	HMDB0059743	Organoheterocyclic compounds	Lactones	Gamma butyrolactones			50.3	52.5	M-H	C5H6O4	-0.0990312	24326.2	25077.8	26837	30285.2	31658.7	1707.69	1477.58	1813.06	1601.28	1401.7	1297.72	1455.35	1379.96	1538.64	1463.81	1571.85
4.18_277.1227m/z	277.123	4.1801	neg	Pantetheine	HMDB0003426	Organic acids and derivatives	Carboxylic acids and derivatives	Amino acids, peptides, and analogues	**	C00831	50.3	57.6	M-H	C11H22N2O4S	-0.331809	5130.41	4551.42	4981.46	5469.06	5072.14	5.88962e-06	433.475	5.88962e-06	5.88962e-06	5.88962e-06	7505.58	4673.71	41.7382	887.646	34.6147	8480.87
4.47_370.2211n	393.21	4.471	pos	Octaethylene glycol	HMDB0094680	Organic oxygen compounds	Organooxygen compounds	Ethers			50.3	56.2	M+Na, M+K, M+NH4, M+H	C16H34O9	2.28953	80606.9	58869.1	64787.8	65423.6	60922.4	76422.2	41164.6	66714	90899.7	103347	61528.2	288559	34376.2	113761	2.74098e+06	98811.4
1.36_152.0569m/z	152.057	1.36257	pos	Guanine	315	Organoheterocyclic compounds	Imidazopyrimidines	Purines and purine derivatives	**	C00242	50.2	56.4	M+H	C5H5N5O	1.57537	38830.3	35605	37964.9	38053.5	39407.6	4851.63	22280.3	5384.9	4278.2	16291.4	52477.5	39518	10638	21033	38590.4	66292.5
11.04_694.4293m/z	694.429	11.0395	pos	Lipid X	LMSL01020001	Lipids and lipid-like molecules	Saccharolipids	Acylaminosugars			50.2	56.9	M+H-H2O	C34H66NO12P	0.430187	38394.8	36658.7	34856.3	33390.1	31277.5	42.1921	38.2075	31.8518	31.075	51.3359	27.8924	5.88962e-06	5.88962e-06	11.807	5.88962e-06	17.8503
11.41_650.4039m/z	650.404	11.4101	neg	PS(14:0/12:0)	LMGP03010931	Lipids and lipid-like molecules	Glycerophospholipids	Glycerophosphoserines			50.2	54.1	M-H	C32H62NO10P	-0.0064836	59920.5	53926.3	58562.3	63112.7	55201.3	5.88962e-06	5.88962e-06	5.88962e-06	220.226	557.513	249.371	5.88962e-06	5.88962e-06	122.788	5.88962e-06	5.88962e-06
4.61_436.1726m/z	436.173	4.6084	neg	PS(6:0/6:0)	LMGP03010020	Lipids and lipid-like molecules	Glycerophospholipids	Glycerophosphoserines			50.2	57.9	M-H2O-H	C18H34NO10P	-3.54327	13149.7	16434.3	12880.2	13886.5	16848.6	378.512	3041.88	579.295	430.346	2623.11	6848.03	7691.42	4211.82	8899.64	7248.81	5584.23
5.49_238.0721m/z	238.072	5.49123	neg	4-Hydroxy-5-phenyltetrahydro-1,3-oxazin-2-one	HMDB0060389	Benzenoids	Benzene and substituted derivatives	Unclassified	**	C16595	50.2	52.7	M+FA-H	C10H11NO3	-0.197125	179.044	191.199	156.133	126.207	116.614	11594.2	3483.38	6927.51	18802.4	5865.89	1751.8	3020.34	4753.04	7065.78	1957.89	1078.08
6.26_369.2282m/z	369.228	6.26198	neg	19(R)-hydroxy-PGE1	36196	Unclassified	Unclassified	Unclassified			50.2	55.4	M-H	C20H34O6	-0.259786	27412.8	26256.7	23237.5	27285	24967.5	460.519	1187.88	1923.67	1619.35	6032.34	2976.2	1497.62	56525.6	8824.49	78210.3	3488.58
7.66_181.0861m/z	181.086	7.65567	pos	1-(2,4-Dihydroxyphenyl)-1-butanone	88210	Organic oxygen compounds	Organooxygen compounds	Carbonyl compounds	*		50.2	54.4	M+H	C10H12O3	1.21664	1125.9	1161.92	911.659	962.058	910.506	2225.59	22035	27919.9	9969.59	31637.6	2110.81	15904.9	949.168	7541.88	5652.75	2855.17
1.87_499.1173m/z	499.117	1.87408	pos	N,N'-Bis(gamma-glutamyl)cystine	HMDB0038458	Organic acids and derivatives	Carboxylic acids and derivatives	Amino acids, peptides, and analogues			50.1	61.8	M+H	C16H26N4O10S2	2.07909	16880.1	17412.2	17484	19648.4	15749.2	872.352	19110.9	242.966	517.329	1541.23	33220	13324.6	1856.13	7815.46	1096.27	3279.93
11.75_331.2635m/z	331.264	11.7462	pos	7,10,13,16,19-Docosapentaenoic acid	HMDB0247288	Lipids and lipid-like molecules	Fatty Acyls	Fatty acids and conjugates	**	C16513	50.1	55.5	M+H	C22H34O2	1.1699	708.396	740.651	811.604	776.726	1108.93	11389.3	10213.9	9933.03	7692.04	22678.7	1921.49	1189.99	121613	11765.2	2182.15	950.811
2.20_247.1293m/z	247.129	2.19553	pos	gamma-Glutamylvaline	HMDB0011172	Organic acids and derivatives	Carboxylic acids and derivatives	Amino acids, peptides, and analogues	*		50.1	54	M+H	C10H18N2O5	1.78738	7976.1	6628.34	8797.92	8262.93	8983.6	5321.34	12466.9	4840.64	3308.97	5956.22	15500	10547.1	8326.7	6570.94	6541.21	2414.93
3.51_231.1476n	232.155	3.51075	pos	Isobutyryl carnitine	34492	Unclassified	Unclassified	Unclassified			50.1	55.7	M+H, M+Na	C11H21NO4	2.43147	63870.1	71375.3	65867	73275.6	78269	12315.2	18843.7	19643.5	15130.5	28908.4	116149	32375.9	4392.64	14446.7	18785.1	60037.1
4.03_281.1138m/z	281.114	4.0304	pos	L-beta-aspartyl-L-phenylalanine	62016	Organic acids and derivatives	Peptidomimetics	Hybrid peptides	*		50.1	59.3	M+H	C13H16N2O5	2.30353	2022.62	2229.01	1998.49	2183.36	2711.34	658.35	2421.33	1091.01	990.503	1814.44	3553.15	2749.07	1141.23	1898.46	1732.17	5076.87
4.30_252.1236m/z	252.124	4.29608	pos	Aloesol	HMDB0035712	Organoheterocyclic compounds	Benzopyrans	1-benzopyrans			50.1	56.5	M+NH4	C13H14O4	2.45045	5931.47	6044.72	5160.58	7690.3	7980.82	3806.67	3670.46	226.09	1315.79	631.145	2694.56	5816.93	719.634	8896.19	178.539	5919.78
4.95_202.1085m/z	202.108	4.94533	neg	N-Lactoylleucine	HMDB0062176	Organic acids and derivatives	Carboxylic acids and derivatives	Amino acids, peptides, and analogues			50.1	52.3	M-H	C9H17NO4	0.0434216	63748.9	58252.1	58157.1	62764.7	64367.5	2000.95	34828.2	3460.73	3182.08	11780.9	67592.9	58333.1	14996.4	23009.6	17055.8	12521.8
10.33_333.2072m/z	333.207	10.3276	neg	5-Oxo-6-trans-leukotriene B4	HMDB0012824	Lipids and lipid-like molecules	Fatty Acyls	Eicosanoids	*		50	56.4	M-H	C20H30O4	0.0920208	1857.85	1990.57	1765.9	2015.85	1668.02	963.255	969.657	739.497	1616.74	1476.86	58.1543	26.6859	10019.6	3610.88	657.951	170.331
5.07_166.0630n	165.056	5.07145	neg	Phenyllactic acid	34529	Phenylpropanoids and polyketides	Phenylpropanoic acids	Unclassified	*	C01479	50	52.5	M-H2O-H, M-H	C9H10O3	0.167021	9397.79	9720.75	10586.3	10768.4	11595	1216.65	2452.54	1991.17	1567.18	2647.33	1769.15	1095.79	9337.63	31925.3	5660.73	5737.41
9.29_327.2177m/z	327.218	9.29378	neg	9-hydroperoxy-12,13-epoxy-10-octadecenoic acid	LMFA02000105	Lipids and lipid-like molecules	Fatty Acyls	Octadecanoids			50	54.5	M-H	C18H32O5	0.145801	9953.75	10436.3	8928.55	9783.43	9198.75	284.121	129.373	155.219	222.414	231.022	372.124	302.532	234.255	199.725	1731.59	234.398
0.79_159.0766m/z	159.077	0.791433	pos	4-Methylene-L-glutamine	63274	Unclassified	Unclassified	Unclassified			49.9	54.2	M+H	C6H10N2O3	1.12508	34873.9	35395.7	32644.8	37981.7	42593.8	7858.04	13793.4	11556.3	6880.53	14944.1	5085.6	4916.66	17455.9	5942.48	2894.63	3604.56
1.44_378.0978m/z	378.098	1.44452	neg	(R)-S-lactoylglutathionate(1-)	HMDB0062624	Organic acids and derivatives	Carboxylic acids and derivatives	Amino acids, peptides, and analogues			49.9	55.3	M-H	C13H21N3O8S	0.308468	84015.1	83321.2	82421.2	88011.5	87106.2	44072.5	8456.36	166.629	3744.39	321.871	6132.6	26116.4	757.756	15920.4	67.1347	84692.8
11.61_665.4271n	666.434	11.6131	pos	PC(16:0/9:0(COOH))	LMGP20010007	Unclassified	Unclassified	Unclassified			49.9	53.4	M+H, M+Na	C33H64NO10P	0.458335	258884	268366	276447	271276	265729	5118.06	2012.65	2133.3	1867.17	3969.92	1466.3	1536.36	1097.78	1809.88	2321.02	692.461
7.68_194.0816m/z	194.082	7.68093	pos	methyl 2-benzamidoacetate	24095	Unclassified	Unclassified	Unclassified			49.9	55.4	M+H	C10H11NO3	2.17135	532.03	578.143	558.257	696.534	584.561	12260.2	3421.27	7492.39	17129.1	6823.4	2552.13	2892.75	4738.05	8916.61	1758.02	1673.73
1.38_486.0801m/z	486.08	1.37747	neg	Cyanidin 3-O-(6''-malonyl-arabinoside)	HMDB0029243	Phenylpropanoids and polyketides	Flavonoids	Flavonoid glycosides	*		49.8	58.9	M-H2O-H	C23H21O13+	-0.599351	636.823	548.171	647.929	532.318	586.399	22763.4	1113.14	211.264	25243.1	317.083	630.209	1280.92	211.906	2974.95	894.428	1174.86
10.22_219.1746m/z	219.175	10.2242	pos	(5alpha,10alpha)-3,7(11)-Eudesmadien-2-one	90429	Lipids and lipid-like molecules	Prenol lipids	Sesquiterpenoids	*		49.8	53.6	M+H	C15H22O	1.2327	60905.7	61563.2	63941.9	61084.7	69216.6	61486	59043.7	58940.4	64606.6	53555.7	54181.7	52767.8	41667.3	52884.4	43092.4	60522.6
4.67_203.0020m/z	203.002	4.67155	neg	O-methoxycatechol-O-sulphate	HMDB0060013	Organic acids and derivatives	Organic sulfuric acids and derivatives	Arylsulfates	*		49.8	53.1	M-H	C7H8O5S	0.149913	113.069	115.052	95.5296	133.735	111.59	38.0719	123.33	570.814	67.861	2969.76	5.88962e-06	757.613	59.5048	2585.21	2554.19	9196.09
6.69_215.1888n	238.178	6.68873	pos	12-amino-dodecanoic acid	35924	Lipids and lipid-like molecules	Fatty Acyls	Fatty Acids and Conjugates			49.8	53.1	M+H, M+Na	C12H25NO2	1.23821	28964.8	25630	26354.2	30149.7	28891.9	20480.3	21159.9	16837.1	25393	23907.1	22772.3	22655.3	19528.5	35350.1	25182.4	32098.3
1.19_132.0247n	150.059	1.1916	pos	THTC	68817	Unclassified	Unclassified	Unclassified			49.7	59.3	M+H, M+NH4	C5H8O2S	1.81411	555975	604798	521802	524383	651176	65184.2	356364	117186	103085	188054	404938	405423	398140	301368	380075	270739
1.43_463.0750n	464.082	1.42748	pos	Adenylosuccinic acid	HMDB0248010	Benzenoids	Benzene and substituted derivatives	Biphenyls and derivatives	**	C03794	49.7	54	M+H, M+Na	C14H18N5O11P	1.97784	189641	194088	213338	216645	219866	1423.76	400.341	115.954	1791.32	2741.48	3890.52	189.396	5.88962e-06	953.028	5.88962e-06	5.88962e-06
4.19_294.1224n	295.13	4.18713	pos	Tyrosylhydroxyproline	HMDB0029106	Organic acids and derivatives	Carboxylic acids and derivatives	Amino acids, peptides, and analogues	*		49.7	54.6	M+H, M+Na	C14H18N2O5	2.68727	9992.6	7456.58	8445.43	8610.59	8374.3	773.509	14203.2	6094.53	1161.68	6610.4	11375.4	8310.1	10363.1	3953.46	4116.18	1655.9
4.38_159.0662m/z	159.066	4.3814	neg	3-Methyladipic acid	HMDB0000555	Lipids and lipid-like molecules	Fatty Acyls	Fatty acids and conjugates	***		49.7	53.9	M-H	C7H12O4	-0.224993	13012.9	13852.3	13631.4	14352.9	14249.9	16138.9	13136.2	15604.8	17404	14868.1	13470	13989.7	14818.5	15844.2	14459.4	16146.6
4.74_192.0667m/z	192.067	4.74178	neg	Phenylacetylglycine	4237	Organic acids and derivatives	Carboxylic acids and derivatives	Amino acids, peptides, and analogues	**	C05598	49.7	50.8	M-H	C10H11NO3	0.216281	8818.27	7747.45	8233.4	8759.82	8351.64	277.916	314.994	223.158	304.943	203.378	324.638	281.749	180.586	227.843	196.952	298.521
7.09_352.2252n	335.222	7.09412	pos	13,14-dihydro-15-keto-PGD2	3817	Lipids and lipid-like molecules	Fatty Acyls	Eicosanoids	*		49.7	54	M+H-H2O, M+H	C20H32O5	0.60066	36291.8	37663	36221.3	36182.8	36887.7	8413.24	1827.75	1523.56	8446.56	28298.3	9324.04	5798.17	96794.9	27266.3	21122.8	2342.75
9.34_344.2800m/z	344.28	9.34062	pos	Dodecanoylcarnitine	34490	Lipids and lipid-like molecules	Fatty Acyls	Fatty acid esters	*		49.7	54.3	M+H	C19H37NO4	1.31729	4917.1	4924.32	5189.86	5524.09	5533.17	1843.48	8226.42	2158.5	3198.54	5569.75	44159.8	48147.4	3109.12	13873.7	5094.9	14662.8
11.19_620.2971n	643.286	11.1941	pos	LysoPI(20:4(5Z,8Z,11Z,14Z)/0:0)	HMDB0061690	Lipids and lipid-like molecules	Glycerophospholipids	Glycerophosphoinositols	*		49.6	53	M+H-H2O, M+Na, M+H	C29H49O12P	1.43003	12948.9	12100	11553.7	11181	10391.1	5691.35	139072	44954	5724.2	81207.2	108534	98793.7	81376.6	148701	91950.3	95507.5
5.94_138.0196m/z	138.02	5.9449	neg	4-Nitrophenol	4100	Benzenoids	Phenols	Nitrophenols	*	C00870	49.6	51.6	M-H	C6H5NO3	-0.509822	8997.98	9179.09	9061.32	9691.22	10086.1	11168.6	8584.75	10034	10527.9	9461.05	8660.14	9229.97	9538.84	9650.88	10551.9	11189
6.72_223.0976m/z	223.098	6.71947	neg	3-(2-Hydroxy-4-methylphenyl)-2-butanone	HMDB0038179	Lipids and lipid-like molecules	Prenol lipids	Monoterpenoids	*		49.6	49.6	M+FA-H	C11H14O2	-0.145663	539.76	499.268	560.048	534.319	584.742	324.174	1116.95	760.439	442.464	2028.63	340.239	614.683	6018.47	686.804	1285.61	276.016
0.71_212.1032m/z	212.103	0.710867	pos	Asparaginyl-Proline	HMDB0028739	Organic acids and derivatives	Carboxylic acids and derivatives	Amino acids, peptides, and analogues	*		49.5	57.7	M+H-H2O	C9H15N3O4	1.10227	13490.8	12435	12659.1	14017	14494.4	97.0962	35.2996	157.837	108.811	21.2548	475.014	796.435	447.156	448.393	467.928	1567.54
10.63_336.2299n	319.227	10.6311	pos	12-epi-LTB4	36246	Lipids and lipid-like molecules	Fatty Acyls	Eicosanoids	*		49.5	53.4	M+H-H2O, M+Na	C20H32O4	-0.449023	12199	13178.6	10765.4	13012.5	12988.5	6510.15	7233.25	10222.4	7363.88	13819.1	4662.51	4651.5	41926	13043.9	6578.53	4542.26
2.23_267.1344m/z	267.134	2.2282	pos	Phenylalanylthreonine	HMDB0029005	Organic acids and derivatives	Carboxylic acids and derivatives	Amino acids, peptides, and analogues	*		49.5	59.3	M+H	C13H18N2O4	1.90063	2439.61	2234.04	2007.39	2432.5	2527.97	2071.44	1291.43	954.19	1954.64	1308.41	3311.4	2356.41	5222.99	5725.31	1527.67	1336.38
2.77_131.0349m/z	131.035	2.77217	neg	3-hydroxy-3-methyl-2-oxo-butanoic acid	LMFA01020277	Lipids and lipid-like molecules	Fatty Acyls	Fatty Acids and Conjugates	**	C04181	49.5	51.6	M-H	C5H8O4	-0.635648	4935.76	5122.31	4828.97	5030.48	4983.34	1559.32	1359.92	1386.52	1954.66	1477.59	1357.08	1327.06	1368.37	1754.51	1376.14	1545.97
3.88_226.1687n	227.176	3.87687	pos	1,8-Diazacyclotetradecane-2,9-dione	66151	Hydrocarbons	Saturated hydrocarbons	Cycloalkanes			49.5	54	M+H, M+Na	C12H22N2O2	2.37571	8690.41	6832.05	7008.31	7496.45	7485.8	6979.77	5139.2	10621.2	7480.8	8878.66	6036.54	6444.96	5041.38	5167.58	3182.54	7484.48
7.88_316.2487m/z	316.249	7.88257	pos	Decanoylcarnitine	HMDB0000651	Lipids and lipid-like molecules	Fatty Acyls	Fatty acid esters	***		49.5	53.1	M+H	C17H33NO4	1.38038	2294.25	2039.82	1949.43	2228.86	2148.85	2913.13	2477.03	2462.38	2158.69	7593.3	7191.58	13078.9	925.698	3661.2	966.474	5716.37
7.89_194.0816m/z	194.082	7.89275	pos	3-Methoxytyrosine	HMDB0001434	Organic acids and derivatives	Carboxylic acids and derivatives	Amino acids, peptides, and analogues	*		49.5	54.1	M+H-H2O	C10H13NO4	2.0974	578.409	504.31	596.18	700.159	596.005	12690.3	4456.63	8515.11	17470.3	7041.29	2947.4	3474.05	5681.42	9398.28	2393.8	1888.02
9.81_350.2095n	349.202	9.8103	neg	Resolvin E1	HMDB0010410	Lipids and lipid-like molecules	Fatty Acyls	Eicosanoids	*		49.5	51.6	M-H2O-H, M-H	C20H30O5	0.538795	7339.24	9454.98	8330.41	8798.31	8008.93	32.8675	100.581	52.4716	5.88962e-06	217.129	175.088	5.88962e-06	710.392	212.356	40.4752	5.88962e-06
10.02_208.1829n	209.19	10.0225	pos	2-Cyclotetradecen-1-one	HMDB0039884	Organic oxygen compounds	Organooxygen compounds	Carbonyl compounds			49.4	50.2	M+H-H2O, M+H	C14H24O	0.996369	2547.67	2741.74	2954.22	3020.32	2919.06	18540.8	41040.2	43318.8	20194.3	68233.5	23694.4	18191	28654.7	56620.9	25048.4	54141.4
10.63_543.3333n	544.341	10.6311	pos	PC(20:4(8Z,11Z,14Z,17Z)/0:0)	LMGP01050140	Lipids and lipid-like molecules	Glycerophospholipids	Glycerophosphocholines	**	C04230	49.4	51.8	M+H, M+Na	C28H50NO7P	1.56963	2842.89	3938.06	3922.88	5730.69	4057.63	96334.7	133818	109414	42877.6	93449.5	61242.4	108621	148067	92514.8	66348.9	87647.7
3.98_439.1024m/z	439.102	3.98497	pos	Riboflavin cyclic-4',5'-phosphate	HMDB0059614	Organoheterocyclic compounds	Pteridines and derivatives	Alloxazines and isoalloxazines		C16071	49.4	57.3	M+H	C17H19N4O8P	2.35293	9424.1	12489	11112.6	11741.5	12651	748.154	7219.55	1490.45	649.45	2903.86	6447.56	6760.02	4117.15	5892.66	4726.67	3536.32
4.05_158.0822m/z	158.082	4.04647	neg	Acetyl-DL-Valine	73550	Unclassified	Unclassified	Unclassified			49.4	51.8	M-H	C7H13NO3	-0.32527	3052.15	2878.48	2531.76	2686.92	2313.29	1617.85	1493.25	1502.82	1627.07	1587.96	1597.08	1796.86	1533.76	1719.77	1448.7	2064.79
5.47_201.0227m/z	201.023	5.47455	neg	4-Ethylphenylsulfate	HMDB0062551	Organic acids and derivatives	Organic sulfuric acids and derivatives	Arylsulfates	*		49.4	52.6	M-H	C8H10O4S	-0.241641	870.009	948.347	755.407	816.434	987.146	5.88962e-06	222.004	2417.91	798.412	1361.87	5.88962e-06	1000.81	2346.66	964.813	3100.44	8205.83
1.54_132.1021m/z	132.102	1.5382	pos	L-Isoleucine	23	Organic acids and derivatives	Carboxylic acids and derivatives	Amino acids, peptides, and analogues	**	C00407	49.3	54.8	M+H	C6H13NO2	1.70874	1.49328e+06	1.47292e+06	1.4691e+06	1.64226e+06	1.57078e+06	382044	1.41453e+06	703223	343888	777701	1.57726e+06	1.60382e+06	1.36783e+06	1.20166e+06	1.10933e+06	893026
10.71_453.2861n	454.293	10.7058	pos	1-(2-methoxy-13-methyl-6Z-tetradecenyl)-sn-glycero-3-phosphoethanolamine	LMGP02060010	Lipids and lipid-like molecules	Glycerophospholipids	Glycerophosphoethanolamines			49.3	51.2	M+H, M+Na	C21H44NO7P	1.24887	16267.3	17911.6	16052.1	16593.4	16155.9	28485.5	21826.1	13532.1	13528.8	22158.1	28468.6	14590.2	21053.4	11942.3	10746	14530.1
10.91_210.1623n	193.159	10.9057	pos	8-tridecynoic acid	LMFA01030601	Lipids and lipid-like molecules	Fatty Acyls	Fatty Acids and Conjugates			49.3	51.2	M+H-H2O, M+Na	C13H22O2	1.37054	65046.2	66579.8	58679.2	58365.5	65114.4	70490.3	59982.2	64007.2	73178	59634.7	57425	56960	46525.7	63923.3	41993	67829.5
11.18_317.2121m/z	317.212	11.1815	neg	12-oxo-ETE	36285	Lipids and lipid-like molecules	Fatty Acyls	Fatty acids and conjugates	**	C14807	49.3	50.5	M-H	C20H30O3	-0.318048	20814.2	19035.8	25383.4	21990	24256.9	799.426	2394.23	1860.99	1916.9	3362	1789.01	1204.84	5306.06	2258.11	2571.07	1715.27
12.57_692.4504m/z	692.45	12.5746	neg	PS(17:0/12:0)	LMGP03010226	Lipids and lipid-like molecules	Glycerophospholipids	Glycerophosphoserines			49.3	50.2	M-H	C35H68NO10P	-0.622068	90182	90410.8	83610	82803.2	83908.7	949.321	146.721	5.88962e-06	5.88962e-06	230.732	5.88962e-06	5.88962e-06	5.88962e-06	5.88962e-06	5.88962e-06	5.88962e-06
2.45_265.0830m/z	265.083	2.45428	neg	N-hydroxy-L-tryptophan	HMDB0255152	Unclassified	Unclassified	Unclassified			49.3	48.1	M+FA-H	C11H12N2O3	-0.0111245	7083.9	8265.7	7790.42	9958.68	9233.36	5.88962e-06	119.49	5.88962e-06	5.88962e-06	22.6711	234.668	776.577	5.88962e-06	166.932	51.8752	53.1564
4.97_203.1161n	204.123	4.96908	pos	Succinylmonocholine	2522	Unclassified	Unclassified	Unclassified			49.3	50.7	M+H, M+Na, M+H-H2O	C9H17NO4	1.92303	17534.3	19354	24106.3	16843.6	19166.4	2213.46	9839.78	1399.3	4320.67	3587.59	16390	9610.64	4198.15	8531.82	2235.35	3881.13
5.45_187.0975m/z	187.098	5.45143	neg	7-octenoic acid	LMFA01030576	Lipids and lipid-like molecules	Fatty Acyls	Fatty Acids and Conjugates			49.3	47.7	M+FA-H	C8H14O2	-0.49496	69112.5	71853.5	68763.6	73755.6	74378.7	49485.9	36662	34649.7	45195.7	38728.2	34357.7	35185.7	33087.8	40506.5	48067.5	33552.4
7.03_209.1538m/z	209.154	7.03123	pos	(5R,6S)-5,6-Epoxy-7-megastigmen-9-one	90350	Organoheterocyclic compounds	Oxepanes	Unclassified	*		49.3	54.2	M+H	C13H20O2	1.15885	5479.96	4759.61	4846.03	5260.88	5037.45	1439.22	1248.21	1700.16	1678.86	1624.94	1357.78	1544.15	1288.33	1841.87	1171.41	1487.06
10.57_310.2146n	293.211	10.5659	pos	9S-hydroxy-12R,13S-epoxy-10E,15Z-octadecadienoic acid	36027	Unclassified	Unclassified	Unclassified			49.2	50.2	M+H-H2O, M+H	C18H30O4	0.658387	83019.1	87926.8	67840	84984.3	74195.5	3701.2	4257.38	4601.56	3912.65	4346.78	4023.96	3326.34	3245.39	4276.13	2500.65	3449.33
10.61_203.1434m/z	203.143	10.6137	pos	alpha-Amylcinnamaldehyde	69414	Phenylpropanoids and polyketides	Cinnamaldehydes	Unclassified	*	C12288	49.2	50	M+H	C14H18O	1.53758	55373.4	55521	48485.6	55865.8	55773.3	59692.5	55035.9	56131.7	64070	47759.2	51091.2	47629.2	43663	54029.2	33208.2	56087.2
10.61_253.1801m/z	253.18	10.6137	pos	Bisacurone B	HMDB0038502	Lipids and lipid-like molecules	Prenol lipids	Sesquiterpenoids	*		49.2	50.7	M+H	C15H24O3	1.0457	7616.53	7603.84	6854.74	8364.68	8743.22	7999.84	7898.13	9439.57	8761	7165.71	6886.94	7220.99	6403.1	9391.61	4557.26	7293.3
11.39_593.3699n	594.377	11.3931	pos	PC(16:0/5:0(CHO))	LMGP20010005	Lipids and lipid-like molecules	Glycerophospholipids	Oxidized glycerophospholipids			49.2	54.3	M+H, M+Na	C29H56NO9P	1.00064	428760	416937	433219	422869	453085	10354.7	5205.7	4032.69	8236.55	3147.62	9483.73	4591.36	3243.07	4505.37	2105.07	4064.93
4.35_265.1553m/z	265.155	4.35187	pos	Valyl-Phenylalanine	HMDB0029134	Organic acids and derivatives	Carboxylic acids and derivatives	Amino acids, peptides, and analogues	***		49.2	52.7	M+H	C14H20N2O3	2.39108	1373.52	1704.93	1746.82	1635.37	1523.32	866.275	532.619	327.048	723.026	641.987	5815.2	3426.13	777.714	2067.73	1678.6	4759.53
4.53_339.2530n	362.242	4.53363	pos	Evocarpine	71459	Unclassified	Unclassified	Unclassified			49.2	65.8	M+H, M+Na	C23H33NO	-9.45985	15124.3	15248.8	19482.4	15267.3	15796.8	16086	9191.37	13994.1	12015.4	13201	15907.5	13358.4	6940.61	14577.4	5369.78	14480.3
7.18_290.2692m/z	290.269	7.18463	pos	Juniperic acid	LMFA01050051	Lipids and lipid-like molecules	Fatty Acyls	Fatty Acids and Conjugates			49.2	50.7	M+NH4	C16H32O3	0.948312	1116.92	1106.51	1227.41	1133.61	1316.76	1727.91	3277.93	2631.12	3556.44	2390.4	7845.32	9442.08	3632.13	5422.22	16130.4	10799.1
1.38_228.0747n	273.073	1.37747	neg	2'-Deoxyuridine	91	Nucleosides, nucleotides, and analogues	Pyrimidine nucleosides	Pyrimidine 2'-deoxyribonucleosides	**	C00526	49.1	51.4	M-H, M+FA-H	C9H12N2O5	0.164731	22288.5	24774.9	24188.8	23194.2	22904.6	341.801	4970.75	1007.06	1182.46	3523.56	6008.5	7691.19	870.321	1678.64	1407.25	2698.54
2.51_107.0496m/z	107.05	2.50945	pos	Benzaldehyde	58358	Benzenoids	Benzene and substituted derivatives	Benzoyl derivatives	**	C00261	49.1	55.1	M+H	C7H6O	4.18554	2100.05	2050.47	1963.69	2143.04	2147.98	787.927	1962.98	876.995	840.403	1256.47	1972.32	2165.38	2331.93	1678.27	1349.07	1448.98
0.71_324.1536n	325.161	0.710867	pos	Istamycin FU-10	71977	Unclassified	Unclassified	Unclassified			49	49.2	M+H, M+Na	C12H24N2O8	1.06044	77121.7	81907.3	80422.7	84680.1	77624.3	3140.1	25081.1	12098.8	4263.94	19227.3	38075.1	40777.9	16953.9	25619.9	31851.3	55883
0.81_339.9965n	362.986	0.809917	pos	Fructose-1,6-diphosphate	HMDB0244240	Organic oxygen compounds	Organooxygen compounds	Carbohydrates and carbohydrate conjugates	**	C05378	49	52.6	M+H-H2O, M+Na	C6H14O12P2	1.18835	56848.3	70918.7	69201	68836.9	76939.1	119445	39005.8	57157.1	61209.1	88190.1	58380.3	29800	39247.4	48163.6	7623.73	29295.6
10.79_666.3987m/z	666.399	10.7913	pos	PHODiA-PC	LMGP20010014	Lipids and lipid-like molecules	Glycerophospholipids	Oxidized glycerophospholipids			49	56.8	M+H	C32H60NO11P	1.56244	29061.4	21646.4	19952.4	18045.7	19138.5	89.0368	51.4157	73.2714	86.9954	105.403	55.0241	31.6043	25.9026	33.6383	59.9448	39.4286
2.17_297.1079n	298.115	2.17173	pos	3'-O-Methylguanosine	58349	Nucleosides, nucleotides, and analogues	Purine nucleosides	Unclassified	*		49	52.3	M+H, M+Na	C11H15N5O5	2.11644	23539	22570.6	23921.7	24995.2	24074	189.757	6097.52	1634.42	596.551	2871.9	6313.99	11725.6	3602.42	4755.85	3439.58	6311.08
3.99_259.1298m/z	259.13	3.98995	neg	gamma-Glutamylisoleucine	HMDB0011170	Organic acids and derivatives	Carboxylic acids and derivatives	Amino acids, peptides, and analogues	*		49	47.9	M-H	C11H20N2O5	-0.402452	7227.76	6355.63	7124.66	7117.1	7214.96	1338.57	14373.1	4701.17	1542.82	4885.9	10548	8820.34	8499.81	4940.54	6951.3	2002.66
4.37_356.1256m/z	356.126	4.37402	pos	5-Oxopyrrolidinyl sulpiride	2611	Unclassified	Unclassified	Unclassified			49	59	M+H	C15H21N3O5S	-5.38711	13128.9	12631	13172.5	11853.7	12966	99.9437	381.001	526.847	366.898	164.235	370.623	573.508	654.711	885.764	334.697	1131.51
7.66_240.1000n	223.097	7.65567	pos	2-carboxyethyl-5-furanpentanoic acid	LMFA01150056	Lipids and lipid-like molecules	Fatty Acyls	Fatty Acids and Conjugates			49	48.8	M+H-H2O, M+H	C12H16O5	1.07805	1070.56	891.048	1031.45	1042.33	972.023	2458.17	26609.4	33480.9	11944.6	38302.6	2609.89	19229.6	1123.28	8915.74	6618.94	3059.63
0.81_261.0964n	262.104	0.809917	pos	Asparaginylglutamic acid	HMDB0028730	Organic acids and derivatives	Carboxylic acids and derivatives	Amino acids, peptides, and analogues	*		48.9	47.9	M+H, M+Na, M+K	C9H15N3O6	1.21985	13616.2	12428	12670.9	11375.3	11114.1	4784.51	31075.4	7598.83	5479.43	12691.8	38917.2	21245.8	26747.1	14775.6	5562.15	12253.7
4.37_159.1263n	182.116	4.37402	pos	Pregabalin	85349	Organic acids and derivatives	Carboxylic acids and derivatives	Amino acids, peptides, and analogues			48.9	48.3	M+H, M+Na, M+H-H2O	C8H17NO2	2.07436	35644.1	38014.8	36471.1	40688.2	38572.2	54809.8	31326.8	47374.2	46837.4	42145.8	35250.3	38230.5	19268.2	39825.9	15554.9	39555.4
9.62_309.1708m/z	309.171	9.62265	neg	12-Oxo-2,3-dinor-10,15-phytodienoic acid	HMDB0032090	Lipids and lipid-like molecules	Fatty Acyls	Eicosanoids	*		48.9	49.5	M+FA-H	C16H24O3	0.172253	14964.7	16707.3	15981.5	15801.7	14516.7	18311.5	16978.1	16220.5	21552.7	17313.3	15941.4	17959.1	16372.9	18559.3	16886.1	17826.9
0.77_313.0443m/z	313.044	0.769183	neg	5'-Phosphoribosyl-N-formylglycinamide	HMDB0001308	Nucleosides, nucleotides, and analogues	Glycinamide ribonucleotides	Unclassified	**	C04376	48.8	46.4	M-H	C8H15N2O9P	0.253561	201756	213974	214830	226767	207711	5.88962e-06	730.317	600.549	209.74	743.385	254.29	1.05597	273.112	12.6319	0.99173	355.895
0.79_196.0582n	195.051	0.78745	neg	Gluconic acid	345	Organic oxygen compounds	Organooxygen compounds	Carbohydrates and carbohydrate conjugates	**	C00257	48.8	45.1	M-H, 2M-H	C6H12O7	-0.372161	715679	717613	707221	753792	751806	116714	72631.7	84144.1	165789	127908	61019.9	78476.9	69943.5	94597.1	23950.3	64788.4
1.10_348.0478n	349.055	1.10293	pos	Inosine 2'-phosphate	62420	Organic oxygen compounds	Organooxygen compounds	Carbohydrates and carbohydrate conjugates	*		48.8	48.8	M+H, M+Na, M+K	C10H13N4O8P	1.98989	632107	650821	615097	659733	680660	648963	1677.89	1364.29	1.00319e+06	25023.3	3000.5	1775.15	1893.49	202514	230.219	1297.66
1.28_321.0701n	344.059	1.27738	pos	Beta-Citryl-L-glutamic acid	HMDB0013220	Organic acids and derivatives	Carboxylic acids and derivatives	Amino acids, peptides, and analogues	*		48.8	47.4	M+Na, M+K, M+H, M+H-H2O	C11H15NO10	1.65465	1427.92	897.842	940.331	1158.25	730.559	50435.8	1.32718e+06	315419	89301.3	788205	2.25023e+06	1.39772e+06	334461	930499	366134	1.52401e+06
10.79_337.2385m/z	337.239	10.7883	neg	12-Keto-tetrahydro-leukotriene B4	HMDB0002995	Lipids and lipid-like molecules	Fatty Acyls	Eicosanoids	**	C02165	48.8	50.6	M-H	C20H34O4	0.325841	380.921	567.394	512.473	504.555	476.916	5.88962e-06	254.884	586.414	140.799	2054.01	404.567	200.603	5818.29	838.79	588.509	82.357
5.21_275.1038m/z	275.104	5.21183	neg	(1xi,3xi)-1,2,3,4-Tetrahydro-1-methyl-beta-carboline-3-carboxylic acid	HMDB0037942	Alkaloids and derivatives	Harmala alkaloids	Unclassified			48.8	45.4	M+FA-H	C13H14N2O2	0.34873	5243.4	5399.54	5349.14	5950.39	5825.34	31.5812	2738.97	85.9697	106.931	325.957	5377.16	4221.21	615.161	556.69	614.828	1190.09
0.87_219.1342m/z	219.134	0.870567	pos	L-Lysopine	HMDB0033675	Organic acids and derivatives	Carboxylic acids and derivatives	Amino acids, peptides, and analogues			48.7	51.8	M+H	C9H18N2O4	1.44915	4881.1	5964.21	6077.49	5468.06	5717.49	1140.89	2577.88	458.85	613.946	904.978	6487.51	4178.95	1139.59	1845.63	908.101	1084.41
0.91_219.0978m/z	219.098	0.911433	pos	5-L-Glutamyl-L-alanine	58376	Organic acids and derivatives	Carboxylic acids and derivatives	Amino acids, peptides, and analogues	**	C03740	48.7	49.3	M+H	C8H14N2O5	1.32934	5735.2	5897.03	4356.6	4421.79	5952.02	3608.62	13928.6	4079.84	1385.29	4324.73	15071	11023	9896.51	6057.71	5043.57	5098.93
10.61_588.3309m/z	588.331	10.6085	neg	PC(0:0/20:4(5Z,8Z,11Z,14Z))	LMGP01050121	Lipids and lipid-like molecules	Glycerophospholipids	Glycerophosphocholines	*		48.7	44.8	M+FA-H	C28H50NO7P	0.373333	3096.44	3161.3	2795.4	3151.96	2612.15	91796	83964.9	95991.7	35058	85214.2	46274.5	84598.5	153689	66133.7	89106.1	71742.6
10.99_237.1851m/z	237.185	10.9949	pos	2,6-Di-tert-butyl-4-hydroxymethylphenol	88146	Benzenoids	Benzene and substituted derivatives	Phenylpropanes			48.7	48.9	M+H	C15H24O2	0.925255	8180.01	8082.64	8153.91	8025.55	7785.72	9662.82	11549.5	9601.31	10874.6	10028.9	9292.35	8660.3	15422	10742.3	6283.96	8684.63
11.37_509.3488n	510.356	11.3706	pos	LysoPC(17:0)	HMDB0012108	Lipids and lipid-like molecules	Glycerophospholipids	Glycerophosphocholines	***	C04230	48.7	53.5	M+H, M+Na	C25H52NO7P	1.26396	19415.3	17237.5	16197.3	19955.7	20202	23838.2	17844.1	19090.2	15250	14391	13908.4	23770.1	15469.5	10784.2	17729.4	12424.5
13.03_354.3369m/z	354.337	13.0279	pos	13Z,16Z-docosadienoic acid	LMFA01030405	Lipids and lipid-like molecules	Fatty Acyls	Fatty acids and conjugates	**	C16533	48.7	49.4	M+NH4	C22H40O2	0.837144	1301.57	1206.59	1466.05	1517.31	1356.02	89628.3	2260.05	4181.28	1735.65	3566.88	1474.11	4557.51	5399.58	4587.48	1628.82	2030.1
4.79_286.0847m/z	286.085	4.78533	pos	5-Methyl-6-hydroxyluteolinidin	LMPK12010443	Lipids and lipid-like molecules	Polyketides	Flavonoids			48.7	60.6	M+H-H2O	C16H15O6+	3.58334	2533.37	2530.67	2569.4	3008.45	3020.68	4060.29	2148.83	357.389	2033.49	446.114	696.848	3011.49	214.805	4902.67	25.0142	4484.81
4.96_349.1851m/z	349.185	4.95587	pos	(1R*,2R*,4R*,8S*)-p-Menthane-1,2,8,9-tetrol 9-glucoside	HMDB0039976	Lipids and lipid-like molecules	Prenol lipids	Terpene glycosides	*		48.7	56.7	M+H-H2O	C16H30O9	-1.61833	780.316	1001.5	765.74	783.705	742.889	643.79	705.71	924.143	833.13	1249.23	614.936	1574.27	537.369	983.237	12020.5	1148.28
4.98_259.1787n	260.186	4.97793	pos	(±)-Hexanoylcarnitine	85174	Unclassified	Unclassified	Unclassified			48.7	48.5	M+H, M+Na	C13H25NO4	1.47744	3572.18	3598.21	4612.13	3698.49	3666.38	1712.1	14418.1	4316.27	4192.15	16264.3	41927.5	43513.1	1614.18	16854.9	4744.04	19588.4
7.71_169.0869m/z	169.087	7.70997	neg	2,3-Dimethyl-2-cyclohexen-1-one	HMDB0031414	Organic oxygen compounds	Organooxygen compounds	Carbonyl compounds	*		48.7	44.8	M+FA-H	C8H12O	-0.644086	8685.24	8712.41	8199.94	8895.22	9486.4	4239.05	3839.56	4379.22	4762.13	3656.42	3800.85	4172.69	4556.68	3759.11	3939.49	3616.97
10.42_476.2782m/z	476.278	10.4184	neg	PE(0:0/18:2(9Z,12Z))	LMGP02050041	Lipids and lipid-like molecules	Glycerophospholipids	Glycerophosphoethanolamines			48.6	48	M-H	C23H44NO7P	-0.177192	7478.94	7300.28	7521.21	6856.77	8946.1	28062.1	14422.3	19851.6	18985.4	23118.4	19865.7	16265.9	14442.4	10274.3	10899.1	11172.9
11.00_594.3413m/z	594.341	10.9972	neg	PC(16:0/3:1(2E))	LMGP01010668	Lipids and lipid-like molecules	Glycerophospholipids	Glycerophosphocholines			48.6	44.7	M+FA-H	C27H52NO8P	0.16109	68549.2	59993.7	73431.3	69896.9	66709.1	784.58	224.273	650.108	1630.75	473.686	95.5978	90.598	5.88962e-06	643.67	5.88962e-06	5.88962e-06
11.37_349.2353m/z	349.235	11.3706	pos	5(S),6(R)-Lipoxin A4 methyl ester	45371	Unclassified	Unclassified	Unclassified			48.6	54.1	M+H-H2O	C21H34O5	-5.58216	24094.1	25199	28164.1	26480.8	27485.6	5841.48	4203.34	4254.45	6449.69	5148.26	5060.47	4509.49	4440.07	5984.18	3374.42	5477.68
2.73_311.1243m/z	311.124	2.73483	pos	gamma-Glutamyltyrosine	HMDB0011741	Organic acids and derivatives	Carboxylic acids and derivatives	Amino acids, peptides, and analogues	*		48.6	49.2	M+H	C14H18N2O6	1.82605	11765.3	10699.1	11391.8	10154	11590.7	656.27	15992.7	7323.76	1024.39	6772.47	13638.3	9509.36	11620.6	4682.02	5328.13	2128.02
5.60_254.0580m/z	254.058	5.60477	pos	p-coumaroyltriacetic acid lactone	HMDB0304447	Unclassified	Unclassified	Unclassified			48.6	52.3	M+H-H2O	C15H11O5-	2.24243	1789.03	1783.19	1636.35	1781.24	2210.59	2894.96	534.887	528.125	10333.7	1615.08	172.128	314.286	2013.02	3622.41	194.414	305.749
7.85_237.1132m/z	237.113	7.85035	neg	11,12,13-Trinor-1(10)-spirovetivene-2,7-dione	HMDB0036734	Organic oxygen compounds	Organooxygen compounds	Carbonyl compounds	*		48.6	44.5	M+FA-H	C12H16O2	-0.235602	6080.85	7180.86	6921.8	6981.45	7183.86	7373.72	6684.91	6751.37	8242.83	6654.06	6838.34	6888.78	7328.86	7871.13	7155.97	8007.28
0.71_110.0717m/z	110.072	0.710867	pos	4-Pyrimidine Methanamine (hydrochloride)	45035	Unclassified	Unclassified	Unclassified			48.5	49.8	M+H	C5H7N3	3.50474	7334.17	8032.05	8759.59	8812.79	8246.02	2251.7	6071.23	1976.45	2369.76	4497.23	7383.6	7211.15	6115.27	4971.21	2389.93	3851.52
0.83_383.1432n	406.132	0.829667	pos	Lacto-N-biose I	HMDB0006575	Organic oxygen compounds	Organooxygen compounds	Carbohydrates and carbohydrate conjugates	*	C06372	48.5	49.1	M+Na, M+K, M+H, M+H-H2O	C14H25NO11	1.07558	203537	211253	197132	192827	201303	16241.1	8524.59	14221.2	7297.8	6950.21	11907.1	6910.45	6167.6	5068.41	5944.6	4661.07
1.09_363.0581n	362.051	1.08587	neg	Guanosine monophosphate	HMDB0001397	Nucleosides, nucleotides, and analogues	Purine nucleotides	Purine ribonucleotides	***	C00144	48.5	46.6	M-H, 2M-H	C10H14N5O8P	0.33073	243894	243310	262242	267104	258205	36942.6	2783.55	3772.84	26259.7	4931.24	11618	8205.56	6538.02	39997.7	4542.72	29582.5
1.47_191.0797n	214.069	1.47218	pos	2-Amino-3,7-dideoxy-D-threo-hept-6-ulosonic acid	63567	Lipids and lipid-like molecules	Fatty Acyls	Fatty Acids and Conjugates			48.5	50.9	M+H, M+Na	C7H13NO5	1.79299	3078.56	2944.2	3029.08	3210.38	3225.07	217.271	1024.23	115.408	387.267	479.605	2023.06	2157.84	315.204	842.431	226.232	548.141
3.52_247.1294m/z	247.129	3.52478	pos	Aspartyl-Isoleucine	85670	Organic acids and derivatives	Carboxylic acids and derivatives	Amino acids, peptides, and analogues	*		48.5	61.4	M+H	C10H18N2O5	2.0962	3524.15	3910.8	3768.24	3897.29	4372.7	2906.35	3483.17	1055.36	1889.23	2173.72	11129.2	7975.15	1430.54	3711.55	1936.3	6085.74
4.83_342.2395m/z	342.24	4.82625	pos	DIPROTIN A	44309	Unclassified	Unclassified	Unclassified			48.5	51	M+H	C17H31N3O4	2.32635	4740.92	4243.27	4940.15	4970.05	5469.56	2254.61	3554.75	1968.17	5113.85	5680.55	8081.88	8457.52	3442.26	8397.11	1595.16	2645.72
5.45_243.0880m/z	243.088	5.45483	pos	Lumichrome	64742	Unclassified	Unclassified	Unclassified	***		48.5	47.6	M+H	C12H10N4O2	1.31703	6221.7	6184.69	5233.82	7487.23	7377.84	281.251	5085.22	1592.59	328.591	1538.51	5671.58	5358.41	3547.03	3141.6	2506.26	7504.31
7.09_316.2041n	317.211	7.09412	pos	Cyrneine A	LMPR0104260001	Lipids and lipid-like molecules	Prenol lipids	Isoprenoids			48.5	47.4	M+H-H2O, M+H	C20H28O3	0.868309	10538.1	11172.8	11145.3	11392.3	11439.2	2745.8	1031.34	623.545	2888.1	8539.45	2585.1	1611.65	29802.1	8162.92	5968.58	973.221
8.64_273.2670n	274.274	8.64493	pos	C16 Sphinganine	41556	Lipids and lipid-like molecules	Sphingolipids	Sphingoid bases			48.5	46.1	M+H, M+Na	C16H35NO2	0.840873	265922	225130	240453	253809	252242	335062	263854	362456	321769	360660	280112	587713	359563	344472	560160	768367
11.97_637.3964n	638.404	11.9734	pos	PS(12:0/13:0)	LMGP03010001	Lipids and lipid-like molecules	Glycerophospholipids	Glycerophosphoserines			48.4	54.3	M+H, M+Na	C31H60NO10P	1.40784	158759	151562	166817	157144	162815	1660.76	641.979	182.043	1234.93	1599.12	235.883	6799.72	558.51	7490.38	41805.4	5198.43
3.90_159.0920m/z	159.092	3.89823	pos	Nicotyrine	68165	Unclassified	Unclassified	Unclassified			48.4	48.3	M+H	C10H10N2	1.82268	12362.5	12172.2	13184.4	15607.6	13647.3	3323.85	6658.56	2357.06	2741.54	2454.09	8257.38	8887.88	5086.82	2675.94	4480.2	4610.31
4.63_346.1173n	347.125	4.62877	pos	Miraxanthin-V	64471	Unclassified	Unclassified	Unclassified			48.4	49.4	M+H, M+Na	C17H18N2O6	2.28366	310.914	270.873	209.018	300.536	245.379	37720.4	7113.72	27223.6	40213.4	18243.3	3108.25	4242.07	10724.6	23095.7	1715.27	1255.43
1.31_144.0421n	189.04	1.311	neg	Ethyl hydrogen fumarate	HMDB0040207	Lipids and lipid-like molecules	Fatty Acyls	Fatty acid esters	*		48.3	43.2	M-H, M+FA-H	C6H8O4	-0.815429	8064.01	9186.89	9448.69	10441.5	11434.5	1407.79	11295.4	2172.75	1422.25	3664.6	17431.1	6790.87	5347.64	6156.89	3064.71	10478.7
1.41_299.0776n	300.085	1.40547	pos	D-4'-Phosphopantothenate	3427	Organic acids and derivatives	Carboxylic acids and derivatives	Amino acids, peptides, and analogues	**	C03492	48.3	47.6	M+H, M+Na	C9H18NO8P	1.90237	1917.91	1951.66	1795.35	1835.88	1942.14	1726.19	26302	6189.24	3354.47	18254.1	12044.3	21064.8	21311.3	20362.8	11206.3	19911.4
2.51_148.0527n	166.087	2.50945	pos	3,4-Dihydro-2H-1-benzopyran-2-one	HMDB0036626	Phenylpropanoids and polyketides	3,4-dihydrocoumarins	Unclassified	***	C02274	48.3	52.4	M+H, M+NH4, M+H-H2O	C9H8O2	1.67517	1.85302e+06	1.83993e+06	1.79191e+06	1.88867e+06	1.89021e+06	583578	1.71338e+06	595850	643339	1.07517e+06	1.88151e+06	1.83055e+06	2.03722e+06	1.33285e+06	1.16154e+06	1.0942e+06
2.60_238.1078m/z	238.108	2.59758	pos	Isoeugenitin	HMDB0029473	Organoheterocyclic compounds	Benzopyrans	1-benzopyrans	*		48.3	47.3	M+NH4	C12H12O4	1.86276	2093.49	1845.45	1862.49	2006.71	2501.27	629.026	3466.82	796.04	102.924	1052.15	3145.68	10135.1	3152.2	4010.59	2096.77	915.646
3.94_229.1552m/z	229.155	3.94212	pos	Leucylproline	HMDB0011175	Organic acids and derivatives	Carboxylic acids and derivatives	Amino acids, peptides, and analogues	***		48.3	47.3	M+H	C11H20N2O3	2.21671	41269.3	39889.6	40709.6	39190.8	39454.7	5503.11	28314.7	13012.2	8952.18	13502.8	48156.4	30748.1	68887	22685.9	47122.5	13751.7
4.44_190.0901m/z	190.09	4.44155	pos	Prenyl-L-cysteine	66519	Organic acids and derivatives	Carboxylic acids and derivatives	Amino acids, peptides, and analogues	*		48.3	53	M+H	C8H15NO2S	2.64544	1562.26	1271.7	1423.25	1690.11	1482.32	423.951	2194.97	2693.24	251.07	1001.97	1503.56	762.986	476.269	457.313	69.5847	1286.16
7.52_300.2094n	301.217	7.51668	pos	7,10,13-Eicosatriynoic acid	LMFA01030698	Lipids and lipid-like molecules	Fatty Acyls	Fatty Acids and Conjugates			48.3	46.4	M+H-H2O, M+H	C20H28O2	1.54531	1578.71	1653.83	1465.75	1528.33	1692.83	270.804	1459.54	3085.01	520.566	23555	2635.92	1500.81	8364.6	8091.64	5904.03	4063.34
0.69_234.1451m/z	234.145	0.690133	pos	Serinyl-Lysine	85937	Organic acids and derivatives	Carboxylic acids and derivatives	Amino acids, peptides, and analogues	*		48.2	49.3	M+H	C9H19N3O4	1.15213	1196.75	1173.65	1117.98	1168.43	1324.63	1562.5	2895.7	1545.25	2144.31	1504.2	4095.9	3043.52	8044.75	3348.6	8482.16	2733.5
1.41_218.1140m/z	218.114	1.40547	pos	N-alpha-Acetyl-L-citrulline	HMDB0000856	Organic acids and derivatives	Carboxylic acids and derivatives	Amino acids, peptides, and analogues	**	C15532	48.2	47.3	M+H	C8H15N3O4	2.05946	138.81	122.998	171.258	97.3652	149.262	1743.51	5.88962e-06	880.838	1232.78	1116.2	5.88962e-06	5.88962e-06	31.5248	5.88962e-06	59.6369	5.88962e-06
10.53_220.1102n	221.118	10.5304	pos	Precocene II	67355	Unclassified	Unclassified	Unclassified			48.2	45.2	M+H-H2O, M+H	C13H16O3	1.13295	20648.9	22209.5	16902.5	21054.6	19997	25250.1	18025.8	19177.2	23483.5	17980.5	17640.8	15162.8	15849.2	21673.4	10717.6	17409.4
10.79_318.2194n	317.212	10.7883	neg	12-HEPE	HMDB0010202	Lipids and lipid-like molecules	Fatty Acyls	Eicosanoids	*		48.2	44.8	M-H2O-H, M-H	C20H30O3	-0.221223	20312	18973.1	19644.5	19744.2	21497.3	10514.6	50992.3	19578.4	33818.8	38380.1	3756.72	8815.83	137595	33347	13043.6	1102.72
11.04_676.3445m/z	676.345	11.0406	neg	OKOOA-PE	LMGP20020044	Lipids and lipid-like molecules	Glycerophospholipids	Oxidized glycerophospholipids			48.2	51.2	M+FA-H	C31H54NO10P	-3.49532	32802.3	28245	27591.5	29243.5	26137.3	466.073	334.046	144.053	487.799	173.363	1241.63	988.906	5.88962e-06	146.033	5.88962e-06	191.021
14.99_391.2846m/z	391.285	14.9941	pos	D8'-Merulinic acid A	HMDB0041454	Benzenoids	Benzene and substituted derivatives	Benzoic acids and derivatives			48.2	51.3	M+H	C24H38O4	0.763946	99229	118035	111025	116435	116756	160155	163675	151742	158577	150996	148799	113767	153696	160626	114101	148179
2.23_365.1354m/z	365.135	2.232	neg	Semilepidinoside B	HMDB0033108	Organic oxygen compounds	Organooxygen compounds	Carbohydrates and carbohydrate conjugates			48.2	45.9	M-H	C17H22N2O7	-0.185085	25163.7	25867	25175.1	27322.9	28597.7	3092.25	28410.6	7648	4302.28	13026.5	30915.5	35889.7	18970.5	31542.8	22374.8	52800.9
4.23_220.0649m/z	220.065	4.23207	neg	N-lactoyl-Methionine	HMDB0062182	Organic acids and derivatives	Carboxylic acids and derivatives	Amino acids, peptides, and analogues			48.2	47.6	M-H	C8H15NO4S	0.144284	22353.7	22441	22353.3	23592.8	21624.7	73.9978	9168.91	351.429	432.996	2158.2	15755.6	12952.5	3739.11	5507.65	3277.19	3515.49
0.77_259.0223m/z	259.022	0.769183	neg	Glucose 6-phosphate	HMDB0001401	Organic oxygen compounds	Organooxygen compounds	Carbohydrates and carbohydrate conjugates	**	C00092	48.1	41.4	M-H	C6H13O9P	-0.504385	194576	199285	190096	204373	208266	73622.1	169055	247423	39712.4	170272	129456	231491	310656	154708	125553	170610
1.19_230.0908n	231.098	1.1916	pos	Aspartyl-Proline	85675	Organic acids and derivatives	Carboxylic acids and derivatives	Amino acids, peptides, and analogues	*		48.1	48.7	M+H-H2O, M+H	C9H14N2O5	2.12801	3691.13	4324.64	2706.8	3580.25	4512.41	751.85	7333.16	4643.14	868.731	4060.82	9287.46	6488.65	12467.7	3918.8	10191.4	2348.76
1.82_145.0506m/z	145.051	1.81943	neg	3-Methylglutaric acid	3798	Lipids and lipid-like molecules	Fatty Acyls	Fatty acids and conjugates	*		48.1	44.4	M-H	C6H10O4	-0.186076	2381.91	2286.84	2462.74	2598.41	2680.31	3684.36	1429.24	12844.5	3758.78	11962.4	1414.59	1493	4002.99	2979.66	2291.17	1572.49
12.20_340.2851m/z	340.285	12.2014	pos	(-)-2,7-Dolabelladiene-6beta,10alpha,18-triol	LMPR0104240002	Lipids and lipid-like molecules	Prenol lipids	Isoprenoids			48.1	47.1	M+NH4	C20H34O3	1.4083	43785.3	42518.3	39066.9	39701.9	41374.7	3945.77	3505.44	3119.25	3994.34	3751.55	4211.92	3069.73	2453.19	6087.56	4105.12	4322.1
2.57_272.1609m/z	272.161	2.5712	pos	Pyrraline	HMDB0033143	Organic acids and derivatives	Carboxylic acids and derivatives	Amino acids, peptides, and analogues			48.1	47.4	M+NH4	C12H18N2O4	1.64785	10134.9	9777.96	9905.98	10134.6	11530.9	2017.13	3959.07	1376.11	1251.53	4079.85	6951.42	6926.03	2464.24	5455.68	3130.73	3303.83
4.74_166.0503m/z	166.05	4.73898	pos	5-Pyridoxolactone	58233	Organoheterocyclic compounds	Pyridines and derivatives	Pyridinecarboxylic acids and derivatives	**	C06052	48.1	47.9	M+H	C8H7NO3	2.61999	440.604	519.606	403.836	455.693	499.133	2237.98	1021.74	1538.75	3167.47	1462.5	812.841	957.657	658.876	1719.45	325.747	641.816
5.31_476.2068m/z	476.207	5.30987	pos	20-Oxo-leukotriene E4	LMFA03020065	Lipids and lipid-like molecules	Fatty Acyls	Fatty acyl thioesters	*		48.1	52.8	M+Na	C23H35NO6S	-2.16002	242381	226321	213508	235329	246317	648.353	59.831	0.978185	823.838	18.2492	1034.22	72.6109	15.5916	1149.45	4.3412	811.769
1.13_173.0924m/z	173.092	1.12545	pos	Glycylproline	4185	Organic acids and derivatives	Carboxylic acids and derivatives	Amino acids, peptides, and analogues	*		48	46.4	M+H	C7H12N2O3	1.94236	2127.43	2009.22	1909.57	2055.39	2143.73	581.697	4309.97	1133.76	351.583	1339.19	6280.77	3815.61	9736.6	3379.11	5859.1	3098.51
11.04_595.3492n	596.356	11.0395	pos	PS-PC	LMGP20010022	Lipids and lipid-like molecules	Glycerophospholipids	Oxidized glycerophospholipids			48	44.4	M+H, M+Na	C28H54NO10P	1.15787	88649.3	91696.5	89296.5	84183.3	91473.9	724.335	5.88962e-06	364.608	1663.16	487.46	5.88962e-06	204.784	5.88962e-06	356.678	124.593	5.88962e-06
12.84_219.1746m/z	219.175	12.8406	pos	alpha-Vetivone	67918	Unclassified	Unclassified	Unclassified			48	45.4	M+H	C15H22O	1.11056	23606.6	22813.6	24297.3	21869.5	22443.7	24029.5	19638.5	23804.7	25302.9	25157.9	22559.5	22161	17716.6	22233.4	14271.6	21514
13.01_264.2455n	282.279	13.0065	pos	(±)-(Z)-2-(5-Tetradecenyl)cyclobutanone	HMDB0037543	Organic oxygen compounds	Organooxygen compounds	Carbonyl compounds			48	43.8	M+H, M+NH4, M+H-H2O	C18H32O	0.826955	1.10967e+06	1.04107e+06	1.02481e+06	921861	947950	1.14445e+06	932578	1.13798e+06	1.18043e+06	1.06605e+06	1.21811e+06	1.53642e+06	912677	1.0602e+06	688245	949620
3.43_233.1500m/z	233.15	3.43167	pos	Threoninyl-Isoleucine	85957	Organic acids and derivatives	Carboxylic acids and derivatives	Amino acids, peptides, and analogues	*		48	53.7	M+H	C10H20N2O4	1.6618	1062.47	1048.08	1100.38	1080.86	1138.57	3452.85	1125.94	731.298	2262.89	1436.65	4241.28	2796.46	2822.97	4608.59	3052.05	2224.56
8.71_301.2853m/z	301.285	8.71352	pos	Prosafrinine	LMSP01080051	Lipids and lipid-like molecules	Sphingolipids	Sphingoid bases			48	45.1	M+NH4	C17H33NO2	1.19146	1595.32	1570.84	1445.32	1487.48	1709.01	2473.31	7899.61	5637.14	11083.8	3860.73	10714.5	1625.81	5684.08	2701.17	2260.98	2893.72
9.45_268.1314n	251.128	9.44793	pos	3,4-dimethyl-5-carboxyethyl-2-furanpentanoic acid	LMFA01150055	Lipids and lipid-like molecules	Fatty Acyls	Fatty Acids and Conjugates			48	44.9	M+H-H2O, M+H	C14H20O5	1.1013	827.59	756.393	1104.51	948.453	992.864	2875.74	15398.5	9577.76	4472.08	10642.6	2937.89	6019.1	2517.65	5649.53	4880.29	6706.64
0.70_407.1729m/z	407.173	0.697283	neg	Gibberellin A36	LMPR0104170019	Lipids and lipid-like molecules	Prenol lipids	Isoprenoids		C11862	47.9	56.1	M+FA-H	C20H26O6	4.80858	359.514	320.779	254.039	341.911	251.988	617.592	3968.42	1581.76	577.868	1225.42	2541.75	4381.68	3814.9	1580.65	5305.63	1562.14
10.55_356.3527m/z	356.353	10.5524	pos	Eicosanoyl-EA	3723	Lipids and lipid-like molecules	Fatty Acyls	Fatty amides			47.9	46.6	M+H	C22H45NO2	1.10198	5322.07	5756.55	5099.47	5675.9	5253.82	11564.4	7858.9	11637.1	10335.2	10894.8	6262.99	8342.19	6465.03	7924.6	13988.8	17265.7
11.22_218.1309n	219.138	11.2159	pos	5,7,9,11,13-tetradecapentaenoic acid	LMFA01030258	Lipids and lipid-like molecules	Fatty Acyls	Fatty Acids and Conjugates			47.9	46.1	M+H-H2O, M+H	C14H18O2	0.85177	663.331	689.665	672.561	588.823	737.622	978.099	2641.11	1224.6	1373.07	1602.7	648.112	746.038	7580.53	1296.07	833.331	442.328
11.28_635.3806n	636.388	11.283	pos	PHOHA-PC	LMGP20010012	Lipids and lipid-like molecules	Glycerophospholipids	Oxidized glycerophospholipids			47.9	49.1	M+H, M+Na	C31H58NO10P	1.23817	131260	121449	123172	121792	124417	339.548	153.215	191.478	274.758	265.648	5.88962e-06	5.88962e-06	169.29	5.88962e-06	5.88962e-06	5.88962e-06
11.59_619.3855n	620.393	11.5907	pos	OOV-PC	LMGP20010028	Lipids and lipid-like molecules	Glycerophospholipids	Oxidized glycerophospholipids			47.9	48	M+H, M+Na	C31H58NO9P	0.939865	151651	159737	160494	165575	161925	3524.96	1408.98	804.368	1049.37	961.877	1184.83	765.32	302.262	527.918	529.934	1258.89
4.70_224.0564m/z	224.056	4.70345	neg	Adrenochrome	HMDB0012884	Organoheterocyclic compounds	Indoles and derivatives	Unclassified	*		47.9	46.2	M+FA-H	C9H9NO3	-0.0649296	1012.85	1073.5	974.619	1151.24	1248.96	14249.4	6482.8	10439.1	23864.8	8482.07	3730.92	4508.75	7956.06	9499.59	4459.85	2770.56
7.52_376.2230n	377.23	7.51668	pos	20α-Dihydroethylprednisolone	1239	Unclassified	Unclassified	Unclassified			47.9	51.5	M+H, M+Na	C22H32O5	-5.23531	4719.15	4782.5	4486.6	4990.14	4740.5	691.117	3931.91	8218.97	1500.85	62313.5	7728.02	4104.76	24401.7	22000.3	16848.1	11700.2
0.77_245.0431m/z	245.043	0.769183	neg	Glycerophosphoglycerol	HMDB0240316	Organic acids and derivatives	Organic phosphoric acids and derivatives	Phosphate esters			47.8	40.3	M-H	C6H15O8P	-0.464282	130593	144116	141364	147345	132868	3512	30725.6	12053	3584.15	15453.9	41655.7	37504	25701.8	28431.4	27894.7	29820.5
0.91_145.0498m/z	145.05	0.911433	pos	(E)-2-Methylglutaconic acid	6584	Lipids and lipid-like molecules	Fatty Acyls	Fatty acids and conjugates	*		47.8	43.3	M+H	C6H8O4	1.71721	136097	137025	140498	142661	145438	147249	115445	149544	154634	140532	130993	127976	101143	140762	85916.3	137596
1.44_400.0796m/z	400.08	1.44452	neg	Cyanidin 3-arabinoside	HMDB0037972	Phenylpropanoids and polyketides	Flavonoids	Flavonoid glycosides			47.8	61.4	M-H2O-H	C20H19O10+	-0.872994	31124.1	31773.6	30697.4	33893.4	32311.1	17760.3	3443.42	5.88962e-06	1499.93	5.88962e-06	2343.01	10408.2	297.645	5978.12	5.88962e-06	31799.6
2.82_295.1295m/z	295.129	2.82328	pos	Phenylalanyl-Glutamate	HMDB0028994	Organic acids and derivatives	Carboxylic acids and derivatives	Amino acids, peptides, and analogues	***		47.8	45.9	M+H	C14H18N2O5	2.13993	5067.05	4784.91	4639.68	5403.04	5562.12	23097.4	4500.19	4163.61	11436.6	4428.4	3840.68	3142.56	12752	10727.7	3182.91	2762.67
5.40_189.1132m/z	189.113	5.39793	neg	(3R,5Z)-5-Octene-1,3-diol	LMFA05000556	Lipids and lipid-like molecules	Fatty Acyls	Fatty alcohols	*		47.8	39.7	M+FA-H	C8H16O2	-0.158512	13962	14090.9	15480.6	16824	15979.6	5487.84	1447.49	2189.29	6315.71	2626.09	1970.73	2343.04	3013.33	3983.61	2846.27	2320.43
0.68_216.1353m/z	216.135	0.676333	neg	Alanyllysine	HMDB0028692	Organic acids and derivatives	Carboxylic acids and derivatives	Amino acids, peptides, and analogues	*		47.7	42.5	M-H	C9H19N3O3	-0.106189	256.067	202.521	290.235	249.976	270.459	5.88962e-06	707.67	186.873	107.218	151.195	698.191	1230.19	5296.75	520.689	5121.21	934.888
0.81_211.0360n	212.043	0.809917	pos	Phosphocreatine	HMDB0001511	Organic acids and derivatives	Carboxylic acids and derivatives	Amino acids, peptides, and analogues	**	C02305	47.7	45.2	M+H, M+Na, M+K	C4H10N3O5P	1.13911	7199.73	6077.61	7452.48	6336.96	6777.67	33726.1	3481.08	8597.44	15359.2	13108.3	1611.24	1618.97	4832.02	6484	1871.5	14335.6
0.85_167.9823n	166.975	0.847483	neg	phosphoenol pyruvate	152	Unclassified	Unclassified	Unclassified			47.7	41.2	M-H, 2M-H, M-H2O-H	C3H5O6P	-0.333353	2940.42	3153.98	3028.19	3207.67	2989.92	31178.6	78288.6	13070.3	5800.42	22264.3	23429.8	45893.7	36042.8	22698.4	14784.1	27664.7
1.15_363.0350m/z	363.035	1.15372	neg	XMP	3505	Nucleosides, nucleotides, and analogues	Purine nucleotides	Purine ribonucleotides	**	C00655	47.7	56.8	M-H	C10H13N4O9P	0.605342	22887.1	29157.8	23576.4	25568.4	24615.6	2394.06	1166.22	1250.88	3355.71	4118.34	1636.92	488.562	1171.31	2761.59	1961.9	455.598
1.26_208.0642m/z	208.064	1.25552	pos	(2R,2'S)-Isobuteine	86955	Organic acids and derivatives	Carboxylic acids and derivatives	Amino acids, peptides, and analogues	*		47.7	46.7	M+H	C7H13NO4S	2.01796	3743.98	3534.87	3730.93	3593.16	3302.3	5.88962e-06	1985.04	29.3909	26.8951	71.829	32139.8	9186.96	102.341	718.999	21.6041	9593.77
1.56_127.0504m/z	127.05	1.55952	pos	Thymine	290	Organoheterocyclic compounds	Diazines	Pyrimidines and pyrimidine derivatives	**	C00178	47.7	46.2	M+H	C5H6N2O2	1.94912	14466.3	14360.4	14750.2	16437.1	15393.8	1220.25	1109.65	1486.97	1174.26	1858.95	1299.73	1742.02	849.704	1671.82	535.764	3281.72
1.77_269.1138m/z	269.114	1.77188	pos	Seryltyrosine	HMDB0029051	Organic acids and derivatives	Carboxylic acids and derivatives	Amino acids, peptides, and analogues	*		47.7	45.6	M+H	C12H16N2O5	2.27437	898.545	967.525	825.236	882.082	1139.63	1971.93	1061.38	290.4	878.752	557.297	1917.22	1302.27	2282.34	3574.46	1622.11	2003.09
10.81_300.2094n	301.217	10.8135	pos	Ethynodiol	HMDB0252090	Lipids and lipid-like molecules	Steroids and steroid derivatives	Steroid esters		C12724	47.7	44.4	M+H-H2O, M+H	C20H28O2	1.39986	11398.2	10236.9	8852.79	8477.32	9572.88	4493.02	17668.1	8110.72	12116.8	12737.8	1502.2	3070.03	38064.7	11578.1	3878.73	1168.24
11.30_329.2479m/z	329.248	11.3044	pos	Docosahexaenoic acid	HMDB0002183	Lipids and lipid-like molecules	Fatty Acyls	Fatty acids and conjugates	***	C06429	47.7	44.5	M+H	C22H32O2	1.09923	2286.17	2095.62	2041.22	2054.14	2129.27	2655.94	4411.99	3558.89	3654.17	8800.3	641.94	829.724	31175.8	5977.52	1597.72	280.494
0.71_241.1298m/z	241.13	0.710867	pos	Anserine	HMDB0000194	Organic acids and derivatives	Peptidomimetics	Hybrid peptides	**	C01262	47.6	43.8	M+H	C10H16N4O3	1.12111	14749.8	15660.2	15573.2	15080	15242.3	5.88962e-06	1237.3	5.88962e-06	5.88962e-06	5.88962e-06	5.88962e-06	5.88962e-06	1740.87	301.396	1314.3	559.753
0.77_198.1240m/z	198.124	0.773167	pos	L-Histidine trimethylbetaine	HMDB0029422	Organic acids and derivatives	Carboxylic acids and derivatives	Amino acids, peptides, and analogues	**	C05575	47.6	44.2	M+H	C9H15N3O2	1.50122	1148.19	875.106	1295.89	1315.31	872.878	13168.6	983.46	12925.6	35936.6	3660.95	361.546	291.956	3297.46	6373.99	433.589	1435.31
1.68_145.0506m/z	145.051	1.67827	neg	Solerol	HMDB0002173	Organoheterocyclic compounds	Lactones	Unclassified			47.6	42.3	M-H	C6H10O4	-0.0297147	4333.27	4243.86	4323.42	4177.21	4145.48	1324.21	1309.06	1253.05	1275.56	1130.5	1183.16	1326.67	1346.01	1239.16	1375.69	1218.73
10.73_470.3486m/z	470.349	10.7309	neg	O-oleoylcarnitine	LMFA07070096	Lipids and lipid-like molecules	Fatty Acyls	Fatty acid esters	*		47.6	42.5	M+FA-H	C25H47NO4	-0.224774	516.135	744.897	701.921	751.881	701.928	24894.1	2990.68	3402.47	14879.5	3484.97	15227.8	6365.53	1255.72	3146.04	1322.75	3370.17
12.82_352.3215m/z	352.321	12.8186	pos	Aplidiasphingosine	LMSP01080016	Lipids and lipid-like molecules	Sphingolipids	Sphingoid bases			47.6	46.9	M+H-H2O	C22H43NO3	1.29961	10721.4	10582.2	10159.6	10737.7	10329.4	1224.97	522.879	387.04	456.127	1639.66	1338.87	1166.85	1551.83	1158.25	630.029	1370.04
5.23_199.0071m/z	199.007	5.23165	neg	4-Vinylphenol sulfate	HMDB0062775	Organic acids and derivatives	Organic sulfuric acids and derivatives	Arylsulfates	*		47.6	42.9	M-H	C8H8O4S	0.0915085	263.767	283.776	311.068	295.655	325.246	690.032	1001.96	4887.35	1076.01	986.482	141.427	2094.01	172.446	822.725	401.081	3559.38
5.68_603.3624n	604.37	5.68388	pos	Fumonisin AK1	HMDB0033397	Organic acids and derivatives	Carboxylic acids and derivatives	Tricarboxylic acids and derivatives	*		47.6	40.1	M+H, M+Na	C30H53NO11	0.942062	1278.09	1722.8	1150.05	1210.16	1289.03	1654.61	1434.15	1374.56	1580.16	1518.87	1655	1125.74	1104.61	2483.47	518.477	127199
7.35_193.1590m/z	193.159	7.35442	pos	Pseudoionone	88498	Lipids and lipid-like molecules	Prenol lipids	Monoterpenoids	*		47.6	42.6	M+H	C13H20O	1.45339	10492.9	10345.1	10309.7	10987.3	10848.4	10586.1	9073.12	10333.5	10595.4	9631.93	10222.2	9135.01	7759.72	9831.1	6885.38	10105.4
9.88_468.3092m/z	468.309	9.88312	pos	PC(0:0/14:0)	LMGP01050073	Lipids and lipid-like molecules	Glycerophospholipids	Glycerophosphocholines			47.6	42.2	M+H	C22H46NO7P	1.48186	19037.1	19555.4	21553	24597.2	23014.2	1021.96	2573.22	1209.63	294.434	3028.88	1642.17	2091.97	2944.38	1646.71	2206.82	2281.6
1.22_160.0615m/z	160.061	1.221	neg	Fructosamine	HMDB0002030	Organic oxygen compounds	Organooxygen compounds	Carbohydrates and carbohydrate conjugates	*		47.5	41.3	M-H2O-H	C6H13NO5	-0.283662	2584.42	2692.09	2880.11	2822.39	2802.34	448.815	2419.1	1076.77	487.956	1746.98	2075.53	1773.27	2043.64	1981.31	1450.07	1922.48
12.45_675.4480n	676.455	12.4512	pos	OON-PC	LMGP20010029	Lipids and lipid-like molecules	Glycerophospholipids	Oxidized glycerophospholipids			47.5	59.9	M+H, M+Na	C35H66NO9P	0.724286	175624	178949	198810	209921	272258	2151.59	2335.76	31389.3	5138.48	12580.6	2748.32	6488.85	15576.3	772.073	125611	21004.1
6.49_315.1342m/z	315.134	6.48768	pos	(S)-Annocherine A	HMDB0038723	Organoheterocyclic compounds	Isoquinolines and derivatives	Benzylisoquinolines			47.5	41.2	M+NH4	C17H15NO4	0.840577	2248.46	2386.02	2466.61	3010.7	2477.25	22481.8	25681.9	24338.9	29598.2	16401.4	21951.3	18640.9	16666.9	18882	8506.09	16854.5
9.10_302.2693m/z	302.269	9.10377	pos	Tanikolide	LMFA07040124	Unclassified	Unclassified	Unclassified			47.5	42.7	M+NH4	C17H32O3	1.23121	12555.3	11724.8	11898.3	12860	12836.6	10876.7	10425.1	12260.1	11848.8	11148.5	11789.5	10944.4	10804.3	13246.5	8564.73	12019.4
0.79_110.0275m/z	110.027	0.791433	pos	Hypotaurine	281	Organic acids and derivatives	Sulfinic acids and derivatives	Sulfinic acids	**	C00519	47.4	49.4	M+H	C2H7NO2S	3.9087	3126.12	2973.47	3383.32	3443.81	4142.34	467.43	1911.9	833.362	398.579	1763.21	7900.2	3914.21	1166.25	1040.21	265.371	1916.8
10.27_191.1796m/z	191.18	10.2743	pos	3,5,7-Trimethyl-2E,4E,6E,8E-undecatetraene	97470	Lipids and lipid-like molecules	Fatty Acyls	Hydrocarbons			47.4	40.5	M+H	C14H22	0.950762	977.555	878.996	887.096	907.748	984.673	1744.54	5064.52	3801.05	1810.81	16357.1	2302.53	1571.54	3199.43	4389.3	1814.8	7883.95
10.61_276.2093n	294.243	10.6137	pos	19-Nor-5-androstenediol	HMDB0004590	Lipids and lipid-like molecules	Steroids and steroid derivatives	Estrane steroids	*		47.4	43.1	M+H, M+NH4	C18H28O2	1.23317	112091	110010	104775	110090	111997	106302	88727.4	101543	109756	96175.7	95315.8	87998.7	81038.2	112592	67531	105736
6.06_178.0509m/z	178.051	6.0645	neg	1,3-Dihydro-(2H)-indol-2-one	HMDB0061918	Organoheterocyclic compounds	Indoles and derivatives	Indolines		C12312	47.4	39.7	M+FA-H	C8H7NO	-0.417369	805.461	859.804	725.43	707.508	836.374	8863.32	3674.81	7213.74	13655	6010.29	1956.33	2514.19	4817.12	6878.83	2688.58	1927.03
0.75_265.1121m/z	265.112	0.752033	pos	Thiamine	229	Organoheterocyclic compounds	Diazines	Pyrimidines and pyrimidine derivatives	**	C00378	47.3	43.3	M+H	C12H16N4OS	1.46383	41632.6	51207.2	46430.3	49103.1	20466.5	5.88962e-06	770.208	5.88962e-06	5.88962e-06	143.922	1337.15	490.059	339.09	5.88962e-06	136.973	1241.89
0.77_333.0593m/z	333.059	0.769183	neg	Glycerophosphoinositol	HMDB0011649	Lipids and lipid-like molecules	Glycerophospholipids	Glycerophosphoinositols	*	C01225	47.3	42.7	M-H	C9H19O11P	0.152763	62791.3	67705.3	67725.2	71612.6	66282.8	1843.74	17479.3	6412.72	2899.53	13956.8	14733.1	15199.8	11941	9859.6	3797.63	14213.5
0.87_249.1084m/z	249.108	0.870567	pos	gamma-Glutamylthreonine	HMDB0029159	Organic acids and derivatives	Carboxylic acids and derivatives	Amino acids, peptides, and analogues	*		47.3	43.3	M+H	C9H16N2O6	1.34573	3323.54	3059.07	3169.47	3758.68	3432.2	7678.28	7226.08	3075.11	3917.61	4651.34	5035.9	3837.36	4868.05	2894.64	1769.8	1433
1.17_210.0441m/z	210.044	1.17223	neg	Methionine sulfoxide	HMDB0002005	Organic acids and derivatives	Carboxylic acids and derivatives	Amino acids, peptides, and analogues	**	C02989	47.3	43.1	M+FA-H	C5H11NO3S	-0.402535	6449.22	9314.25	9458.68	12829.6	9772.97	323.992	2663.34	54.0973	207.797	348.12	3035.16	4377	403.697	6428.47	50.3418	12565.6
1.47_233.1137m/z	233.114	1.47218	pos	Aspartyl-Valine	85680	Organic acids and derivatives	Carboxylic acids and derivatives	Amino acids, peptides, and analogues	*		47.3	52.5	M+H	C9H16N2O5	2.07968	583.252	502.152	531.778	541.174	596.466	417.179	1823.77	582.667	898.169	430.744	2699.59	2820.78	1691.85	1104.29	1876.58	1901.81
10.26_450.2627m/z	450.263	10.262	neg	PE(16:1(9Z)/0:0)	LMGP02050010	Lipids and lipid-like molecules	Glycerophospholipids	Glycerophosphoethanolamines			47.3	40.9	M-H	C21H42NO7P	0.144064	20885	20422.6	20387.6	21421.9	21030.3	3137.71	3643.56	3980.36	1800.69	4137.98	2679.4	2512.79	2427.34	2184.72	3045.27	1783.36
11.32_462.2991m/z	462.299	11.3188	neg	LysoPE(P-18:1(9Z)/0:0)	HMDB0240599	Lipids and lipid-like molecules	Glycerophospholipids	Glycerophosphoethanolamines			47.3	41.7	M-H	C23H46NO6P	0.136374	1206.13	1111.13	1622.55	1156.84	1216.61	43380.6	60261.5	48514.8	25038.1	40010.8	72577.1	74062.8	43939.6	31138.6	88000	25764
11.72_348.2662n	347.259	11.7156	neg	Carbocyclic thromboxane A2	HMDB0249633	Unclassified	Unclassified	Unclassified			47.3	41.5	M-H2O-H, M-H	C22H36O3	-0.661317	3143.3	2832.02	3370.68	3465.4	3220.71	17237	20531.4	14516.8	15769.3	43438.9	3266.1	2328.22	288052	34867.8	11461	1733.5
12.14_402.2258n	425.215	12.1358	pos	Acetyl tributyl citrate	89746	Organic acids and derivatives	Carboxylic acids and derivatives	Tetracarboxylic acids and derivatives			47.3	43	M+Na, M+K, M+H	C20H34O8	1.03973	313180	306989	423129	455192	456473	777808	366485	447395	389821	433446	488193	545155	528007	623362	316608	567232
4.40_169.9917m/z	169.992	4.39737	neg	Lanthionine ketimine	HMDB0004823	Organic acids and derivatives	Carboxylic acids and derivatives	Amino acids, peptides, and analogues	*		47.3	40.8	M-H2O-H	C6H7NO4S	-0.0690851	1578.33	2390.29	2067.89	2182.42	1930.99	574.768	7387.09	1898.18	842.458	1920.42	1904.63	2631.37	8227.89	2870.75	2757.4	1517.89
4.89_313.1552m/z	313.155	4.89478	pos	Phenylalanylphenylalanine	HMDB0013302	Organic acids and derivatives	Carboxylic acids and derivatives	Amino acids, peptides, and analogues	***		47.3	41.7	M+H	C18H20N2O3	1.84171	823.988	477.514	618.699	707.445	715.18	4764.85	1051.27	255.808	3054.91	1151.9	2175.49	974.462	6830.56	7930.82	1184.91	3003.64
5.11_220.0971m/z	220.097	5.1087	pos	alpha-Hydroxy-1-methyl-1H-indole-3-propanoic acid	93058	Organoheterocyclic compounds	Indoles and derivatives	Indolyl carboxylic acids and derivatives			47.3	41.8	M+H	C12H13NO3	1.45917	3825.92	2942.25	2471.41	3251.09	3514.36	1730.88	670.676	164.166	4394.98	983.919	716.072	581.659	2455	2923.7	425.476	404.405
0.87_363.0582n	364.065	0.870567	pos	Precursor Z	72085	Organoheterocyclic compounds	Pteridines and derivatives	Pterins and derivatives	*		47.2	41.5	M+H, M+Na, M+K	C10H14N5O8P	0.442673	547252	516167	500617	505467	571812	48071.4	1937.11	1651.03	32918.1	7053.5	4770.96	4183.65	2338.91	25643.3	979.27	8463.49
1.20_200.0564m/z	200.056	1.19978	neg	O-Succinyl-L-homoserine	HMDB0255868	Unclassified	Unclassified	Unclassified			47.2	41.2	M-H2O-H	C8H13NO6	-0.0844754	2629.17	2456.57	2789.95	3083.73	2793.25	1645.69	6997.61	2066.94	2244.08	5002	7736.43	11734.3	4770.36	6081.27	5967.62	8821.68
11.06_219.1746m/z	219.175	11.062	pos	beta-Elemenone	53387	Lipids and lipid-like molecules	Prenol lipids	Sesquiterpenoids	*		47.2	42.5	M+H	C15H22O	1.24752	24193	23975.7	24317.3	22678.3	21527.3	30904.5	24221.8	28696.5	32766.4	26456	26751.9	24875.7	20291.5	25867.6	15247.5	24787.4
13.78_383.3403n	406.33	13.7843	pos	N-stearoyl valine	LMFA08020122	Lipids and lipid-like molecules	Fatty Acyls	Fatty amides			47.2	44.1	M+H, M+Na	C23H45NO3	0.982222	12902.6	14255.8	24709.9	24327.3	23713.9	18394.7	11830.9	18519.2	20405.6	22115.2	20411.9	19534.7	19744.2	21527.1	17546.8	19214.3
2.29_278.0943n	279.102	2.28907	pos	gamma-Glutamylmethionine	HMDB0034367	Organic acids and derivatives	Carboxylic acids and derivatives	Amino acids, peptides, and analogues			47.2	44.1	M+H, M+Na	C10H18N2O5S	2.18412	2039.23	1626.71	1577.84	1790.15	1761.65	96.6804	28378.3	7325.56	1016.09	9977.07	25901.6	16086.1	25392.4	9238.95	11422.3	6865.07
9.97_135.1170m/z	135.117	9.9656	pos	(S)-(-)-Perillyl alcohol	41074	Lipids and lipid-like molecules	Prenol lipids	Monoterpenoids		C02452	47.2	41.6	M+H-H2O	C10H16O	1.12196	1298.41	1398.05	1349.12	1144.32	1031.74	2060.99	2624.29	2867.08	2068.89	3811.03	2007.85	1659.07	2040.9	3437.36	1729.76	3199.27
0.79_314.0517n	315.059	0.791433	pos	5'-Phosphoribosyl-N-formylglycinamide (FGAR)	3443	Unclassified	Unclassified	Unclassified			47.1	39.9	M+H, M+Na, M+K	C8H15N2O9P	0.52365	94638.4	111026	105908	99953	105584	1544.96	6425.68	4189.66	1712.75	7129.06	6594.2	12734.3	7132.22	7659.1	4229.29	9298.01
1.10_360.1763n	361.184	1.10293	pos	1-O-(8R-hydroxy-8-methyl-3Z,9-decadienoyl)-beta-D-glucopyranose	98324	Lipids and lipid-like molecules	Fatty Acyls	Fatty acyl glycosides			47.1	50.3	M+H, M+Na	C17H28O8	-5.98852	3637.04	4126	3400.41	3763.63	4141.08	91.451	21759.8	2886.33	1510.33	1730.6	618.121	1356.13	31170.2	1918.35	35335.6	3656.89
10.19_270.2198n	271.227	10.1858	pos	16-hydroxy-5-hexadecenoic acid	LMFA01050271	Lipids and lipid-like molecules	Fatty Acyls	Fatty Acids and Conjugates			47.1	43.1	M+H-H2O, M+H	C16H30O3	0.995832	3940.41	4181.55	4314.06	4211.31	4407.88	5319.37	9526.88	8727.63	5690.22	20132.8	6258.24	4624.09	6802.94	10322.4	5039.36	12290.2
11.50_165.0407m/z	165.041	11.5039	neg	4-Deoxythreonic acid	HMDB0002453	Organic oxygen compounds	Organooxygen compounds	Carbohydrates and carbohydrate conjugates	*		47.1	46	M+FA-H	C4H8O4	2.20178	2835.56	2875.54	2988.08	3074.33	3392.81	3398.73	3510.85	2303.94	2851.35	2213.29	2487.9	3146.02	2403.03	2847.24	3011.7	3090.75
7.15_223.0976m/z	223.098	7.14805	neg	alpha,alpha-Dimethylphenethyl formate	HMDB0036235	Benzenoids	Benzene and substituted derivatives	Phenylpropanes			47.1	36.8	M+FA-H	C11H14O2	-0.178508	10148.8	10864.7	11822.3	10764.8	12727.1	14017.5	10411.8	13059.5	13631.7	12273.2	11597.1	12062.9	13387.6	13915.9	13116.3	11573.6
7.75_298.1935n	299.201	7.75283	pos	Norethynodrel	HMDB0255736	Unclassified	Unclassified	Unclassified			47.1	37.2	M+H-H2O, M+H	C20H26O2	0.829209	11884.4	11725.6	12258.8	12636.5	14910.3	700.41	855.463	2033.73	1094.09	12159.2	1267.47	739.619	6050.59	15838.6	3886.95	4435.77
1.99_253.1188m/z	253.119	1.99437	pos	Phenylalanylserine	HMDB0029004	Organic acids and derivatives	Carboxylic acids and derivatives	Amino acids, peptides, and analogues	*		47	39.6	M+H	C12H16N2O4	1.94979	2768.53	2827.7	2404.41	2646.47	3256.54	751.503	2134.85	440.767	1010.21	787.318	7265.9	4289.55	4879.78	3658.95	4314.84	3213.26
11.24_312.2536m/z	312.254	11.2384	pos	(9R,13R)-10,11-dihydro-12-oxo-15-phytoenoic acid	LMFA02010006	Lipids and lipid-like molecules	Fatty Acyls	Octadecanoids			47	41.8	M+NH4	C18H30O3	1.10122	6883.3	6473.47	6959.2	6828.19	6560.45	890.281	486.817	1235.03	896.666	856.909	724.695	618.648	672.559	893.832	614.209	735.396
11.39_367.2223m/z	367.222	11.3931	pos	Fortimicin KK1	71970	Unclassified	Unclassified	Unclassified			47	48.5	M+H	C14H30N4O7	9.79099	935.235	1037.16	1066.13	863.675	722.737	696.154	3428.88	1458.79	1745.61	4260.26	1308.45	658.072	12310.2	2540.32	524.397	418.532
2.25_279.0985m/z	279.099	2.2537	neg	Phenylalanylaspartic acid	HMDB0028991	Organic acids and derivatives	Carboxylic acids and derivatives	Amino acids, peptides, and analogues	*		47	40.8	M-H	C13H16N2O5	-0.443858	843.91	832.993	844.871	1041.41	944.12	6746.86	1595.09	538.983	5869.16	1645.25	1152.83	953.448	6817.54	8997.88	950.848	448.831
2.51_397.1117m/z	397.112	2.50945	pos	Swertiamarin	HMDB0258644	Unclassified	Unclassified	Unclassified			47	43.8	M+Na	C16H22O10	3.13433	7401.73	8864.1	9649.58	9241.29	9603.46	1211.28	11540.8	1652.49	1386.12	4438.95	12150.7	13360.9	14261.1	7834.92	7170.35	5054.71
4.76_361.1399m/z	361.14	4.7622	pos	Bavachinin	LMPK12140040	Lipids and lipid-like molecules	Polyketides	Flavonoids			47	44.7	M+Na	C21H22O4	-3.21642	2411.73	3214.46	4003.34	2297.3	3842.87	53879.8	22060.1	35154.7	68752.5	23945.1	17459	20939.8	15181.7	47555.2	7918.22	21477
5.04_171.1262n	194.115	5.04318	pos	Gabapentin	2989	Organic acids and derivatives	Carboxylic acids and derivatives	Amino acids, peptides, and analogues			47	46.5	M+Na, M+K, M+H, M+H-H2O	C9H17NO2	1.6095	2.25139e+06	2.08472e+06	1.99179e+06	2.20611e+06	2.20793e+06	2.20722e+06	1.70975e+06	1.96294e+06	2.21043e+06	1.91994e+06	1.85698e+06	1.81313e+06	1.43206e+06	1.99905e+06	997750	2.00967e+06
1.21_130.0501m/z	130.05	1.21112	pos	4-Oxoproline	63471	Unclassified	Unclassified	Unclassified			46.9	43.2	M+H	C5H7NO3	2.03366	50277.9	45686.1	46502.6	50961.5	49459.2	26731.1	86127.1	50200.4	34523.3	71162.6	72417	39690.5	37929.6	34815.4	22971.6	30182.4
1.23_296.1015n	297.109	1.233	pos	Tyrosyl-Aspartate	85993	Organic acids and derivatives	Carboxylic acids and derivatives	Amino acids, peptides, and analogues	*		46.9	39.7	M+H, M+Na	C13H16N2O6	2.1139	2224.45	2580.57	3446.89	2593.74	2001.52	1974.71	6174.64	2445.27	1598.5	3475.13	4066.28	4009.07	12873.2	3918.31	9745.21	3176.24
1.32_233.1136m/z	233.114	1.31848	pos	Threonylhydroxyproline	HMDB0029062	Organic acids and derivatives	Carboxylic acids and derivatives	Amino acids, peptides, and analogues	*		46.9	39.6	M+H	C9H16N2O5	1.72373	204.305	117.894	193.332	223.787	202.684	2351.35	305.655	318.248	2681.15	966.873	1189.2	301.777	104.308	329.073	330.72	476.118
10.18_233.1539m/z	233.154	10.1768	pos	alantolactone	53412	Lipids and lipid-like molecules	Prenol lipids	Terpene lactones	*	C09289	46.9	43.1	M+H	C15H20O2	1.41708	12428.8	12267.9	12470	12524.7	12389.3	12141.2	11190.6	12969.9	13173.6	10340.8	12388.1	11258.2	9294.9	13051.6	9088.11	11620.8
10.38_293.2114m/z	293.211	10.3844	pos	(9R,13R)-12-oxo-phytodienoic acid	36053	Unclassified	Unclassified	Unclassified			46.9	39.3	M+H	C18H28O3	0.923194	22869.9	22089.2	22445.1	22180.6	25340.2	2765.42	2710.48	3402.93	2502.45	2961.64	2332.3	2304.09	2094.42	2797.32	1860.66	3307.77
10.76_279.1964m/z	279.196	10.7597	neg	7Z,11Z,13E-Hexadecatrienal	LMFA06000226	Lipids and lipid-like molecules	Fatty Acyls	Fatty aldehydes			46.9	37.6	M+FA-H	C16H26O	-0.630864	797.269	772.32	789.498	1080.11	1053.85	5.88962e-06	547.712	180.208	1970.43	2371.99	7236.25	8519.77	13412.1	4575.97	7718.56	980.975
11.11_416.3294n	417.337	11.1054	pos	Calcitriol	6382	Lipids and lipid-like molecules	Steroids and steroid derivatives	Vitamin D and derivatives	**	C01673	46.9	42.6	M+H-H2O, M+H	C27H44O3	0.904575	11180.2	11313.1	9934.68	10746.6	9848.71	189.995	61.3956	5.88962e-06	8.6661	10.1081	147.88	48.6596	5.88962e-06	5.88962e-06	5.88962e-06	5.88962e-06
4.14_282.1685n	283.176	4.14067	pos	Hexaethylene glycol	HMDB0061822	Organic oxygen compounds	Organooxygen compounds	Ethers			46.9	38.7	M+H, M+NH4, M+K	C12H26O7	2.23988	11017.8	9985.46	12776.5	10661.7	11462.5	15322.9	7715.86	13342.8	14229.7	19924.3	8675.36	21565.3	8439.56	14838.2	334379	12314.6
5.27_360.1324n	361.14	5.27382	pos	3-Methoxytyramine-βxanthin	64466	Unclassified	Unclassified	Unclassified			46.9	38.7	M+H, M+Na	C18H20N2O6	0.851594	4551.63	4139.22	4799.2	4392.59	4090.82	61838.4	33029	47833.9	120612	42855.7	30101.9	29386.8	26192.9	44678.1	7967.61	23538.2
6.94_215.1287m/z	215.129	6.94377	neg	9-Decenoic acid	HMDB0031003	Lipids and lipid-like molecules	Fatty Acyls	Fatty acids and conjugates	*		46.9	36.6	M+FA-H	C10H18O2	-0.90091	8568.49	8917.98	9233.16	8692.88	9588.38	4971.03	3881.58	3656.11	4038.49	3968.09	3654.19	3482.9	3813.38	4380.04	4641.63	3808.42
8.34_207.1026m/z	207.103	8.33982	neg	epi-4'-hydroxyjasmonic acid	LMFA02020008	Lipids and lipid-like molecules	Fatty Acyls	Octadecanoids			46.9	38.4	M-H2O-H	C12H18O4	-0.301404	44282.5	44590.9	45935.8	44714	45739.3	53256.1	44686.5	56022.7	61067.4	51415.7	54307	46707.8	60834.8	50642.3	51442	51853.1
1.10_189.1238m/z	189.124	1.10293	pos	N-Alpha-acetyllysine	63102	Organic acids and derivatives	Carboxylic acids and derivatives	Amino acids, peptides, and analogues	*	C12989	46.8	40.4	M+H	C8H16N2O3	2.25426	3879.43	4505.5	3701.15	3798.72	3725.29	1196.57	10342.1	5509.46	1621.55	3871.32	9261.59	7257.06	13080.6	4998.84	9318.78	3100.02
10.22_179.1432m/z	179.143	10.2242	pos	Aleprylic acid	LMFA01030189	Lipids and lipid-like molecules	Fatty Acyls	Fatty Acids and Conjugates			46.8	37.8	M+H-H2O	C12H20O2	0.997672	24473.6	25781.2	24206.4	24578.5	26874.2	24183.7	22611.1	23825.3	24967.7	21577.1	21492.4	20008.4	17753	22705.3	16107.6	22978.3
10.22_263.1651m/z	263.165	10.2244	neg	Zerumbone	HMDB0036667	Lipids and lipid-like molecules	Prenol lipids	Sesquiterpenoids	*		46.8	37.2	M+FA-H	C15H22O	-0.594769	9975.89	10728.1	9188.95	9579.85	12368.9	10927.2	9683.36	9943.2	11623.4	9396.91	9726.19	10781.1	9467.51	11200.9	9883.06	10578
10.27_398.3269m/z	398.327	10.2743	pos	2-Hydroxyhexadecanoylcarnitine	LMFA07070113	Unclassified	Unclassified	Unclassified	*		46.8	39.6	M+H-H2O	C23H45NO5	1.05051	7911.06	8027.68	8410.87	8484.57	8676.74	35438.5	16291.9	5754.6	12754	16384.9	130387	60754.2	5118.77	20003.9	5435.47	23499.8
10.73_284.2950m/z	284.295	10.7278	pos	3Z,13Z-octadecadien-1-ol	LMFA05000047	Lipids and lipid-like molecules	Fatty Acyls	Fatty alcohols			46.8	39.1	M+NH4	C18H34O	0.881564	9920.29	9447.22	9330.26	8911.37	11021.2	21466.4	4640.35	7060.41	10140.7	6789.17	1989.97	2179.67	9927.58	9669.1	10280.8	3182.12
11.55_205.0862m/z	205.086	11.5465	pos	Monoisobutyl phthalic acid	HMDB0002056	Benzenoids	Benzene and substituted derivatives	Benzoic acids and derivatives	*		46.8	38.3	M+H-H2O	C12H14O4	1.30274	43725	42766.4	42451.4	42178.4	42930	57119.2	43325.5	52135	54802.1	49067.9	45687.5	47117	38614.3	50522.3	29706.6	46243.5
11.55_259.2059m/z	259.206	11.5465	pos	Stearidonic acid	LMFA01030357	Lipids and lipid-like molecules	Fatty Acyls	Lineolic acids and derivatives	**	C16300	46.8	39.5	M+H-H2O	C18H28O2	1.11027	31296.3	31332.9	32746.7	30217.4	31584.4	41003.1	33738.6	36503	41128.7	38716.4	36315.7	31969.4	27985.9	35043.6	18366	29685.8
11.78_526.2887m/z	526.289	11.7828	pos	LysoPE(0:0/20:3(8Z,11Z,14Z))	HMDB0011486	Lipids and lipid-like molecules	Glycerophospholipids	Glycerophosphoethanolamines	*		46.8	46.2	M+Na	C25H46NO7P	-3.32496	14161.8	14517.1	15939.2	14344.9	13178.7	7045.15	14634.5	12058.9	4447.5	12783.4	8725.29	8469.17	9374.82	8000.97	4553.7	2825.29
11.98_555.2727m/z	555.273	11.984	neg	PG(22:6(4Z,7Z,10Z,13Z,16Z,19Z)/0:0)	LMGP04050016	Lipids and lipid-like molecules	Glycerophospholipids	Glycerophosphoglycerols			46.8	39.6	M-H	C28H45O9P	-0.346438	1440.76	1435.31	1133.43	1718.79	1595.73	123.806	96117.6	50416.9	9233.37	38530.9	17462.5	39273.9	46417.1	41527.1	53666.9	18977.5
3.58_218.1393m/z	218.139	3.58282	pos	4E-Decenedioic acid	LMFA01170044	Lipids and lipid-like molecules	Fatty Acyls	Fatty Acids and Conjugates			46.8	41.1	M+NH4	C10H16O4	2.84398	3503.08	3675.13	3233.08	3984.39	3820.17	5265.4	974.205	462.407	742.924	553.453	1300.37	2697.99	173.881	3068.78	156.364	2857.85
0.69_218.1502m/z	218.15	0.690133	pos	β-Alanyl-L-lysine	63570	Organic acids and derivatives	Peptidomimetics	Hybrid peptides	**	C05341	46.7	39	M+H	C9H19N3O3	1.44441	971.304	846.581	999.476	937.244	1188.52	369.65	6457.44	1069.03	494.968	921.588	4169.31	4423.89	18319.4	2491.76	21841.1	4886.08
0.71_228.1476n	246.182	0.710867	pos	L-isoleucyl-L-proline	62022	Organic acids and derivatives	Carboxylic acids and derivatives	Amino acids, peptides, and analogues	*		46.7	39.2	M+H, M+NH4	C11H20N2O3	1.09049	41879.8	43318.3	43765.1	46273.1	49376.6	26357	16061.6	10962.7	18656.9	12564.2	25655.8	24923.5	20875.7	20689.5	5675.87	9451.87
0.85_174.1008n	175.108	0.84955	pos	N2-Acetylornithine	HMDB0003357	Organic acids and derivatives	Carboxylic acids and derivatives	Amino acids, peptides, and analogues	**	C00437	46.7	40.9	M+H, M+Na	C7H14N2O3	2.1844	10259.4	11701.3	9902.32	10991.8	10185.2	1078.19	1400.54	2022.7	1003.88	3421.99	1687.6	1261.74	2320.91	648.954	1178.12	1289.81
0.87_243.0858n	244.093	0.870567	pos	Cytidine	HMDB0000089	Nucleosides, nucleotides, and analogues	Pyrimidine nucleosides	Unclassified	***	C00475	46.7	37.1	M+H, M+K, M+Na	C9H13N3O5	1.28733	128499	129518	126781	127077	142787	3305.69	13623	3012.65	1374.8	11866	26403.6	46272.2	5911.29	10198.5	3289.3	14658.8
10.38_205.1590m/z	205.159	10.3756	pos	Isokobusone	HMDB0036791	Organic oxygen compounds	Organooxygen compounds	Alcohols and polyols	*		46.7	38.3	M+H-H2O	C14H22O2	1.3494	47644.1	46885.7	43049.1	42418.5	45566	50003.7	42356.2	46764	51841.3	42550.7	42158.1	39641.1	33400.7	45379.6	28232.6	46071.5
2.36_242.0907n	265.08	2.36175	pos	Thymidine	HMDB0000273	Nucleosides, nucleotides, and analogues	Pyrimidine nucleosides	Pyrimidine 2'-deoxyribonucleosides	**	C00214	46.7	38	M+H, M+Na	C10H14N2O5	1.95534	18504.8	18344.4	22119	19434.5	20188	125.797	122.396	90.2816	111.076	184.415	177.585	107.297	64.3989	136.404	116.745	325.098
4.37_363.1199m/z	363.12	4.37105	neg	2-iodo-hexadecanoic acid	LMFA01090037	Lipids and lipid-like molecules	Fatty Acyls	Fatty Acids and Conjugates			46.7	38.7	M-H2O-H	C16H31IO2	2.35013	754.243	750.698	669.236	918.829	937.941	32914.1	5083.99	13126.7	41734.3	10715.9	2989.14	3225.49	7846.73	12497.5	2931.03	1822.31
6.46_212.1647m/z	212.165	6.46385	pos	Cucujolide IX	LMFA07040037	Lipids and lipid-like molecules	Fatty Acyls	Fatty esters			46.7	37	M+NH4	C12H18O2	1.05215	17585.1	17623.2	16683.5	19878.4	18532.3	19881.8	15929.3	18340.1	20034.4	17588.3	17902.7	16478.1	15272.2	20084.6	12674.8	19138.1
7.43_210.1258n	233.115	7.43492	pos	3-Ethenyl-2,5-dimethyl-4-oxohex-5-en-2-yl acetate	95954	Organic oxygen compounds	Organooxygen compounds	Carbonyl compounds			46.7	36.6	M+H, M+Na, M+K	C12H18O3	0.974131	370810	342963	376249	400524	394287	360021	318119	334785	366084	367086	318914	350047	285412	391944	267106	360443
7.54_246.1525m/z	246.152	7.53695	pos	S-3-oxodecanoyl cysteamine	HMDB0059773	Lipids and lipid-like molecules	Fatty Acyls	Fatty acyl thioesters	*		46.7	40.3	M+H	C12H23NO2S	1.05162	18141.4	16410.6	16876.1	16428.2	16961.6	4859.08	37742.9	8089.87	2597.32	2495.98	30132.7	14942.2	9999.7	8808.32	4580.2	18807.4
0.85_361.1656m/z	361.166	0.84955	pos	(-)-jasmonoyl-L-isoleucine	HMDB0303944	Organic acids and derivatives	Carboxylic acids and derivatives	Amino acids, peptides, and analogues	*	C18699	46.6	41.4	M+K	C18H28NO4-	1.79901	37168	35625.8	39723.2	40423.4	34240.2	9835.58	24210.2	6513.85	20536.5	3159.63	21393.5	8002.52	14344.8	17472.2	5496.02	7218.16
1.42_484.0489m/z	484.049	1.42188	neg	N-Desmethyl-o-O-sulfate rosiglitazone	HMDB0060837	Organic acids and derivatives	Organic sulfuric acids and derivatives	Arylsulfates	*		46.6	44.7	M+FA-H	C17H17N3O7S2	-0.24676	50904.3	54249.9	55115.6	55838	55116.4	1099.18	510.327	5.88962e-06	880.883	821.273	1822.32	656.949	76.4449	364.583	401.28	1724.56
10.30_325.1753m/z	325.175	10.2969	pos	Dihydroxycarteolol M1	1555	Unclassified	Unclassified	Unclassified			46.6	39	M+H	C16H24N2O5	-1.52042	3382.55	3242.35	3045.52	3139.72	2946.3	1154.66	124.489	196.382	1073.17	3135.36	676.483	232.522	6787.67	2890.41	2243.47	305.755
10.73_320.2564m/z	320.256	10.7278	pos	2S-amino-octadeca-4E,6E-diene-1,3R-diol	LMSP01080059	Unclassified	Unclassified	Unclassified			46.6	37.9	M+Na	C18H35NO2	1.3165	231381	233507	216354	220759	248529	261633	231023	218812	253669	196771	220949	218174	189063	256856	154221	253273
15.14_312.3263m/z	312.326	15.1445	pos	Phytal	HMDB0035654	Lipids and lipid-like molecules	Prenol lipids	Diterpenoids	*		46.6	37.2	M+NH4	C20H38O	0.84288	11646.2	11589	10738.7	10944.4	12515.3	31996.6	11585.7	12876.7	18369.9	15120.9	15863.3	15190.1	40041.6	28757.3	9895.25	32408.1
3.77_117.0557m/z	117.056	3.76712	neg	L-α-Hydroxyisovaleric acid	4129	Unclassified	Unclassified	Unclassified			46.6	35	M-H	C5H10O3	-0.371402	7518.59	6808.4	8861.52	8322.72	8039.08	4518.67	3489.04	3564.56	2670.28	4590.47	4100.76	2422.23	3794.21	3300	5436.92	4284.43
3.90_330.2031m/z	330.203	3.89823	pos	Betaxolol	HMDB0014341	Benzenoids	Phenols	Tyrosols and derivatives		C06849	46.6	44.2	M+Na	C18H29NO3	-2.79305	12886.1	12687.4	13475.8	16671.3	12586.8	1122.43	1946.94	553.77	1217.16	2124.3	7394.53	5732.17	1888.61	3237.43	1308.41	1863.44
4.49_174.1856m/z	174.186	4.4937	pos	Menthol	HMDB0003352	Lipids and lipid-like molecules	Prenol lipids	Monoterpenoids	**	C00400	46.6	37.6	M+NH4	C10H20O	2.44177	346.544	254.531	336.456	275.869	278.89	529.769	403.185	1400.67	422.039	971.554	1536.82	522.33	997.222	27931.1	16304.4	575.295
4.71_539.2996m/z	539.3	4.70952	pos	Frangulanine	HMDB0030199	Organic acids and derivatives	Carboxylic acids and derivatives	Amino acids, peptides, and analogues	*	C10003	46.6	36.1	M+K	C28H44N4O4	0.298554	2670.66	3738.4	2559.81	3088.98	3133.37	1357.86	1376.24	2057.3	4268.18	3554.92	604.618	650.97	11076.2	6522.63	921.143	245.434
6.75_189.0912m/z	189.091	6.75283	pos	(E)-3-(2-Methylpropylidene)-1(3H)-isobenzofuranone	88130	Organoheterocyclic compounds	Isocoumarans	Isobenzofuranones	*		46.6	42.9	M+H	C12H12O2	1.22396	411.249	377.96	416.854	447.168	452.884	317.881	694.117	484.993	316.759	1045.94	381.813	479.242	3112.63	454.153	573.391	292.117
9.38_221.1546m/z	221.155	9.38468	neg	1-Phenylheptane	HMDB0061825	Benzenoids	Benzene and substituted derivatives	Unclassified			46.6	35.4	M+FA-H	C13H20	-0.661955	5524.16	5869.27	5313.96	6009.96	6377.27	6040.37	4137.58	5674.59	6710.38	5832.08	4730.15	5134.89	5000.55	6147.71	6098.28	4940.53
0.77_290.1229n	291.13	0.773167	pos	Argininosuccinic acid	389	Organic acids and derivatives	Carboxylic acids and derivatives	Amino acids, peptides, and analogues	**	C03406	46.5	38.5	M+H, M+Na	C10H18N4O6	0.834549	19875.1	26565.8	20895.8	20252.5	17637.5	486.129	70657.5	2329.44	905.135	18631.7	80767.7	38705.8	23882.5	24645.8	6469.79	15466.9
0.93_288.1203m/z	288.12	0.9311	neg	Prolyl-Gamma-glutamate	HMDB0029031	Organic acids and derivatives	Carboxylic acids and derivatives	Amino acids, peptides, and analogues	*		46.5	39.6	M+FA-H	C10H17N3O4	0.580379	315.992	478.748	490.934	539.335	671.184	3074.32	1264.46	871.143	4713.55	752.98	5342.62	2244.81	1143.48	1632.04	2057.7	6336.5
10.01_295.1907m/z	295.191	10.014	pos	(7Z)-14-hydroxy-10,13-dioxoheptadec-7-enoic acid	LMFA01050450	Lipids and lipid-like molecules	Fatty Acyls	Fatty Acids and Conjugates			46.5	38.8	M+H-H2O	C17H28O5	1.14659	7228.73	5570.17	6506.53	7716.19	6722.83	6056.72	5611.35	5608.02	6401.58	4981.41	5566.9	4732.14	4296.67	7085.07	4220.25	6162.47
10.27_119.0859m/z	119.086	10.2743	pos	(±)-1-(4-Methylphenyl)ethanol	HMDB0034378	Benzenoids	Benzene and substituted derivatives	Toluenes			46.5	38.6	M+H-H2O	C9H12O	2.52916	3424.8	3149.31	3987.33	3575.35	3653.8	2584.58	2264.69	2318.2	3053.42	2568.44	2081.28	1737.97	1710.52	2698.3	1762.9	4346.26
10.27_135.1170m/z	135.117	10.2743	pos	1-Methyl-2-propylbenzene	88576	Benzenoids	Benzene and substituted derivatives	Phenylpropanes	*		46.5	38.1	M+H	C10H14	1.06308	1067.09	1254.05	1297.61	959.629	1052.82	1456.95	2126.92	1827.23	1547.79	4795.25	1530.96	1303.96	1634.46	1961.97	1050.02	2802.02
10.27_260.2142n	278.248	10.2659	pos	6-[1]-ladderane hexanol	LMFA01140088	Lipids and lipid-like molecules	Fatty Acyls	Fatty Acids and Conjugates			46.5	37.3	M+H, M+NH4	C18H28O	0.800436	30272.6	27097.9	28504.3	30161.3	30727.1	31589.1	26196.2	27463	34353.3	24446.4	28028.8	31691.1	27418.9	36485.9	25014.5	30281.3
10.84_333.1354m/z	333.135	10.8354	neg	Amifloxacin	HMDB0041826	Organoheterocyclic compounds	Quinolines and derivatives	Quinoline carboxylic acids			46.5	44	M-H	C16H19FN4O3	-4.43724	23689.6	24716.7	23607.9	24578.5	21921.2	47214.3	38368.5	30649.6	36047.8	28854.7	25094.7	30522	28779.3	31709.7	30360.5	31002
10.97_291.2322m/z	291.232	10.9725	pos	3-Methyl-5-pentyl-2-furannonanoic acid	HMDB0031091	Lipids and lipid-like molecules	Fatty Acyls	Fatty acids and conjugates	*		46.5	39.4	M+H-H2O	C19H32O3	0.987576	2324.3	2723.85	1667.51	2330.22	2037.32	1273.23	278.931	288.759	741.413	4983.91	1237.38	487.74	12239.3	4533.1	2152.74	453.316
11.57_297.2427m/z	297.243	11.5687	pos	6-hydroxy-9Z,12Z-octadecadienoic acid	35570	Unclassified	Unclassified	Unclassified			46.5	37	M+H	C18H32O3	1.06857	91024.2	87775.4	93063.2	89712.9	86981.2	10853.5	9296.93	10839.6	11435.9	11977.6	12549.4	10186.5	8533.15	11857.3	5396.61	9518.8
12.20_566.3836m/z	566.384	12.2014	pos	1-(2-methoxy-heneicosanyl)-sn-glycero-3-phosphoserine	LMGP03060020	Lipids and lipid-like molecules	Glycerophospholipids	Glycerophosphoserines			46.5	50.6	M+H-H2O	C28H58NO9P	3.41122	3392.68	3614.15	5186.78	5620.63	4288.11	5.88962e-06	5.88962e-06	1606.66	5.88962e-06	534.144	5.88962e-06	150.083	587.148	5.88962e-06	20357.1	3276.07
2.51_120.0811m/z	120.081	2.50945	pos	2-Hydroxyphenethylamine	HMDB0001065	Organic nitrogen compounds	Organonitrogen compounds	Amines	*	C02735	46.5	44.1	M+H-H2O	C8H11NO	2.64053	692768	696558	697852	752437	746693	218655	669430	226299	240811	414891	733277	725055	804275	521547	453495	421487
3.87_349.0128m/z	349.013	3.87258	neg	6-Chloroapigenin	LMPK12110430	Lipids and lipid-like molecules	Polyketides	Flavonoids			46.5	61	M+FA-H	C15H9ClO5	2.59129	8303.28	5915.73	4492.43	4981.13	4413.95	3011.11	5591.94	1862.45	2631.42	1602.93	5397.68	5250.2	5193.52	1883.35	4025.17	3079.53
4.18_138.0560m/z	138.056	4.1801	neg	Paramethadione	HMDB0014755	Organoheterocyclic compounds	Azolidines	Oxazolidines		C07411	46.5	41	M-H2O-H	C7H11NO3	-0.199479	591.092	539.633	576.104	570.055	574.659	7861.51	3897.17	6067.08	14667.1	5062.42	2511.19	3434.5	3022.79	7367.29	2176.13	2609.25
4.32_326.1948n	349.184	4.32317	pos	Heptaethylene glycol	HMDB0061835	Organic oxygen compounds	Organooxygen compounds	Ethers			46.5	38.1	M+Na, M+K, M+NH4, M+H	C14H30O8	2.39243	56138.8	57344.6	66122.4	69638.5	60406.6	68981.5	49878	100122	62183.3	102581	46544.7	174323	31088.2	108409	2.1088e+06	86855.3
9.15_258.2431m/z	258.243	9.15052	pos	9-Pentadecenoic acid	HMDB0029765	Lipids and lipid-like molecules	Fatty Acyls	Fatty acids and conjugates	*		46.5	35.9	M+NH4	C15H28O2	1.38173	6999.94	6748.34	6473.31	5839.86	7118.86	5906.35	5718.82	6694.31	6707.38	6254.7	5309.72	6056.2	5649.08	6300.88	4664.52	6547.47
1.15_225.0755n	248.065	1.14785	pos	ANCITABINE	44413	Unclassified	Unclassified	Unclassified			46.4	38.9	M+Na, M+K, M+H	C9H11N3O4	2.40606	29929.5	31321.8	32106.1	30904	30516.4	95.4249	1458.44	3515.54	114.805	1901.37	1428.91	511.656	737.771	635.173	392.273	2312.31
10.55_278.1886n	279.196	10.5524	pos	12-oxo-5E,8E,10Z-heptadecatrienoic acid	LMFA01060111	Lipids and lipid-like molecules	Fatty Acyls	Fatty Acids and Conjugates			46.4	37.3	M+H-H2O, M+H	C17H26O3	1.40559	2349.95	2291.5	1729.4	2532.48	1927.24	1094.4	708.505	792.245	2049.53	2941.03	936.901	1308.96	14129.3	2772.46	1690.14	829.159
10.79_545.3490n	546.356	10.7913	pos	1-(8Z,11Z,14Z-eicosatrienoyl)-sn-glycero-3-phosphocholine	4075	Unclassified	Unclassified	Unclassified			46.4	37.6	M+H, M+Na	C28H52NO7P	1.48812	369.786	421.911	227.91	461.599	340.543	5571.49	28907.3	7300.85	3856.52	19807.6	40098.2	43893	18871.6	13591.4	7757.09	10573.5
10.93_478.2938m/z	478.294	10.9297	neg	LysoPE(0:0/18:1(9Z))	HMDB0011476	Lipids and lipid-like molecules	Glycerophospholipids	Glycerophosphoethanolamines	*		46.4	37.5	M-H	C23H46NO7P	-0.233611	56140.3	57131.3	58644	58689.4	44666.6	78641.6	57358.7	57672.8	75177	56275.6	64573.7	62309.1	47703.6	40249.8	41307.2	49420.9
3.54_279.1347m/z	279.135	3.5393	pos	Tyrosyl-Proline	HMDB0029113	Organic acids and derivatives	Carboxylic acids and derivatives	Amino acids, peptides, and analogues	*		46.4	39.4	M+H	C14H18N2O4	2.81813	5725.13	5818.99	6647.3	5922.26	6927.91	2522.29	4898.27	3038.03	3136.85	7093.4	7293.54	8325.21	10343.2	4123.31	4662.7	3923.84
5.17_261.1342m/z	261.134	5.17438	neg	Undecanedioic acid	HMDB0000888	Lipids and lipid-like molecules	Fatty Acyls	Fatty acids and conjugates	*		46.4	34.5	M+FA-H	C11H20O4	-0.529316	5532.44	5794.45	5345.15	6719.4	4927.9	5777.88	3879.5	5282.34	5702.12	4782.52	4689.16	4871.76	5301.94	4376.93	5314.32	4995.85
8.08_210.1623n	193.159	8.07573	pos	9-tridecynoic acid	LMFA01030602	Lipids and lipid-like molecules	Fatty Acyls	Fatty Acids and Conjugates			46.4	37.1	M+H-H2O, M+Na	C13H22O2	1.30932	18349.7	17773.7	18869.5	18867.4	19522.4	18097.8	15450.6	16976.1	17542.1	17802.6	16304.8	16803.4	14393.9	20192.3	12903.2	18181.5
8.72_230.2481m/z	230.248	8.72287	pos	Xestoaminol C	53933	Lipids and lipid-like molecules	Sphingolipids	Sphingoid bases			46.4	36.1	M+H	C14H31NO	1.15633	41290	39249.2	39910.8	40728.7	42826.9	27874	20116.2	30441.3	34087.1	29561.5	20258.7	32536.6	20229.7	26217.8	24659.9	46579.5
0.85_177.0404m/z	177.04	0.847483	neg	2-Keto-3-deoxy-D-gluconic acid	6184	Organic acids and derivatives	Keto acids and derivatives	Medium-chain keto acids and derivatives	**	C01216	46.3	36.4	M-H	C6H10O6	-0.119544	3064.89	2243.04	3194.58	2959.08	3304.83	8085.42	2753.22	4268.86	15126.1	6063.06	981.403	1501.29	4130.49	4739.19	559.46	972.036
1.00_174.0408m/z	174.041	0.998567	neg	1-Pyrroline-4-hydroxy-2-carboxylate	HMDB0002234	Organoheterocyclic compounds	Pyrrolines	Unclassified	**	C04282	46.3	32.1	M+FA-H	C5H7NO3	-0.197892	5978.24	5977.11	5968.74	6297.9	6744.64	345.213	17463.8	2673.5	1219.14	9577.8	26441.5	13188.1	7120.03	7048.81	9006.38	13540.2
1.82_103.0400m/z	103.04	1.81943	neg	4-Hydroxybutyric acid	HMDB0000710	Lipids and lipid-like molecules	Fatty Acyls	Fatty acids and conjugates	*	C01991	46.3	33.2	M-H	C4H8O3	-0.576398	1602.42	1629.78	1745.08	1700.69	1767.85	2866.53	2169.38	3368.61	2053.84	1995.45	4685.17	2906.3	1444.27	2121.32	3858.94	3674.83
10.27_446.2539m/z	446.254	10.2743	pos	Austalide L	HMDB0030158	Phenylpropanoids and polyketides	Flavonoids	Flavones	*		46.3	38.1	M+NH4	C25H32O6	0.493666	7203.86	6671.06	7619.4	6938.68	5731.4	5947.04	5065.68	5041.42	5625.06	4092.1	3547.24	3323.74	2953.2	5146.7	3454.46	8809.88
12.27_666.4345m/z	666.434	12.2662	pos	PAz-PC	63020	Unclassified	Unclassified	Unclassified			46.3	37.8	M+H	C33H64NO10P	0.604039	22059.4	24452.5	25113.5	27013.9	24866.7	559.443	300.681	181.842	5.88962e-06	576.285	5.88962e-06	544.219	178.096	5.88962e-06	277.776	184.539
13.36_284.2950m/z	284.295	13.3569	pos	3E,13Z-octadecadien-1-ol	LMFA05000048	Lipids and lipid-like molecules	Fatty Acyls	Fatty alcohols			46.3	39	M+NH4	C18H34O	0.768419	20846.6	20124.3	21494.3	20114.8	21050.3	21194	17044.8	19182.3	20566	22124.4	20954	18993.6	16385.7	21032.5	12949.4	21295.9
3.38_187.1088m/z	187.109	3.37838	neg	Glycylleucine	HMDB0000759	Organic acids and derivatives	Carboxylic acids and derivatives	Amino acids, peptides, and analogues	***	C02155	46.3	37.5	M-H	C8H16N2O3	-0.340447	714.652	644.302	698.135	800.655	834.305	425.833	673.962	75.5322	177.926	67.0275	3940.95	1984.86	1043.3	929.95	2130.58	3360.55
3.86_179.0571m/z	179.057	3.85843	neg	Theophylline	1458	Organoheterocyclic compounds	Imidazopyrimidines	Purines and purine derivatives	**	C07130	46.3	43.3	M-H	C7H8N4O2	-2.13862	423.529	398.645	409.958	449.414	390.338	712.197	649.561	622.053	777.981	588.208	730.69	917.36	3186.61	579.963	970.692	671.186
4.47_264.1115n	265.119	4.471	pos	N(2)-phenylacetyl-L-glutaminate	HMDB0062645	Organic acids and derivatives	Carboxylic acids and derivatives	Amino acids, peptides, and analogues		C05597	46.3	37.6	M+H, M+Na	C13H16N2O4	1.94879	384.878	247.719	243.689	368.16	332.811	1609.97	2354.65	3958.89	1557.95	9141.93	381.048	2040.38	377.174	2829.76	4839.17	825.696
8.43_210.1623n	228.196	8.42528	pos	7-tridecynoic acid	LMFA01030600	Lipids and lipid-like molecules	Fatty Acyls	Fatty Acids and Conjugates			46.3	35.7	M+H-H2O, M+H, M+NH4	C13H22O2	1.30384	408054	373785	399019	413338	419490	359989	312633	348795	382655	392668	354591	357830	327085	559330	320416	426570
0.69_261.1560m/z	261.156	0.690133	pos	Asparaginyl-Lysine	85651	Organic acids and derivatives	Carboxylic acids and derivatives	Amino acids, peptides, and analogues	*		46.2	37.6	M+H	C10H20N4O4	1.20924	1456.16	1674.62	1576.97	1790.82	1457.7	707.64	13129.1	3386.84	863.792	2370.19	5766.64	5423.84	18296.1	2911.87	31772.6	7286.5
0.77_148.0372n	147.03	0.769183	neg	D-Xylono-1,5-lactone	HMDB0011676	Organoheterocyclic compounds	Lactones	Delta valerolactones	**	C02266	46.2	32.9	M-H2O-H, M-H	C5H8O5	-0.132699	97587	102475	102760	110531	98022.9	3457.78	45139.1	6848.07	2279.24	20949.3	55010.3	35955.8	17844.6	31409.5	10483.8	60157.3
1.19_152.0336n	153.041	1.1916	pos	Oxypurinol	866	Organoheterocyclic compounds	Imidazopyrimidines	Purines and purine derivatives	*	C07599	46.2	38	M+H, M+NH4, M+Na	C5H4N4O2	1.15243	556954	584477	567306	587652	638439	10186	193048	111225	34239.5	161217	260819	234768	121434	206785	121657	254349
1.28_194.0451m/z	194.045	1.27738	pos	3-Amino-4,7-dihydroxycoumarin	64591	Unclassified	Unclassified	Unclassified			46.2	35.5	M+H	C9H7NO4	1.569	207.952	238.896	213.852	226.511	285.089	128.813	6317.86	1371.33	246.182	3431.28	11005.9	6231.39	1592.81	4063.87	1663.12	7057.89
11.61_317.2120m/z	317.212	11.6113	neg	(+/-)-5-HEPE	LMFA03070027	Lipids and lipid-like molecules	Fatty Acyls	Eicosanoids	*		46.2	35.7	M-H	C20H30O3	-0.550459	12252.8	14074.6	12605.3	12325.8	13947.5	588.122	2981.93	3106.39	1636.73	3506.02	1379.05	531.111	3897.73	3046.31	5159.02	1710.44
14.99_384.3396n	367.336	14.9941	pos	25-hydroxycholesterol	HMDB0006247	Lipids and lipid-like molecules	Steroids and steroid derivatives	Cholestane steroids	***	C15519	46.2	36.2	M+H-H2O, M+H	C27H44O	0.945482	191620	345752	350136	338102	338107	16984.1	2980.13	6752.59	30847.4	14032.9	5126.02	1477.09	5757.61	12195	1418.67	2762.7
3.98_348.0711m/z	348.071	3.98497	pos	7-alpha-D-Ribosyladenine 5'-phosphate	66172	Unclassified	Unclassified	Unclassified			46.2	41.2	M+H	C10H14N5O7P	2.25876	8805.45	9603.17	9156.91	9761.98	10944.2	964.703	5330.36	1649.57	736.816	3266.31	6017.77	6594.61	3982.37	5329.01	4355.78	3292.68
4.13_286.1767m/z	286.177	4.13148	pos	Leu-Gly-Pro	65659	Unclassified	Unclassified	Unclassified			46.2	37.4	M+H	C13H23N3O4	2.05844	11835.8	11415.4	14519.1	12564.9	12149.3	1542.26	3760.52	705.07	1482.01	2010.86	7450.37	7228.26	2171.72	3915.6	3831.21	3776.58
5.14_171.0663m/z	171.066	5.14147	neg	4-Hydroxy-4-methyl-5-hexenoic acid gamma lactone	HMDB0032333	Organoheterocyclic compounds	Lactones	Gamma butyrolactones	*		46.2	32.9	M+FA-H	C7H10O2	-0.0932741	6935.2	7334.71	6901.22	7667.15	6803.98	11086.8	9361.09	10509.3	12884.6	10201.8	9806.24	10178.3	10514.6	9438.33	10155.2	10384.6
5.73_145.0870m/z	145.087	5.7311	neg	2-Hexen-1-ol	HMDB0030952	Lipids and lipid-like molecules	Fatty Acyls	Fatty alcohols	*		46.2	32.5	M+FA-H	C6H12O	-0.641158	5483.81	5270.75	5936.47	5958.32	5714.65	4082.44	1942.64	2896.72	8116.16	5005.41	2197.97	2297.56	3408.94	6568.07	3390.58	2581.01
7.72_315.1964m/z	315.196	7.7241	neg	8-deoxy-J2-IsoP	LMFA03110062	Unclassified	Unclassified	Unclassified			46.2	35.6	M-H	C20H28O3	-0.390645	6294.51	6092.02	5584.26	5728.15	6610.01	5.88962e-06	5.88962e-06	684.466	5.88962e-06	7187.45	191.451	5.88962e-06	3447.83	8288.26	2839.4	2218.31
9.95_183.0807m/z	183.081	9.95128	pos	Benzophenone	66382	Benzenoids	Benzene and substituted derivatives	Benzophenones	*	C06354	46.2	43.9	M+H	C13H10O	1.60551	17054.3	17294.8	18066.3	19105.7	19234.5	17245.1	14219.9	18189.1	17843.1	16019.6	15644.3	16577.9	12578.2	17129.5	12591.6	17494.9
1.27_267.0967n	312.095	1.26567	neg	Zidovudine	HMDB0014638	Nucleosides, nucleotides, and analogues	Pyrimidine nucleosides	Pyrimidine 2',3'-dideoxyribonucleosides	**	C07210	46.1	32.3	M-H, M+FA-H	C10H13N5O4	-0.118068	62330.6	70348.6	62350.8	65085.7	66575.5	2355.18	17883.8	8938.15	9475.74	26741	15757.1	17191.3	21338	15865.8	42098.1	19345.4
10.53_233.1903m/z	233.19	10.5304	pos	1-(2,6,6-Trimethyl-2-cyclohexen-1-yl)-1,6-heptadien-3-one	86435	Lipids and lipid-like molecules	Prenol lipids	Sesquiterpenoids	*		46.1	34.9	M+H	C16H24O	1.33454	7387.8	7123.15	5736.89	6648.65	7570.48	7193.28	6260.5	5589.87	6224.8	5342.33	5392.7	4760.86	4431.38	6631.5	3583.37	5425.21
11.13_439.3065n	440.314	11.1272	pos	Arachidonoyl dopamine	43429	Unclassified	Unclassified	Unclassified			46.1	47.7	M+H, M+Na	C28H41NO3	-4.80384	22186.5	23708.8	23391.9	22519.5	22459.1	11973.1	4678.56	5675.4	4238.76	3709.55	3521.72	4020.33	2306.49	3053.23	3032.21	1624.56
2.21_231.0444m/z	231.044	2.21182	neg	Glutamylcysteine	HMDB0028816	Organic acids and derivatives	Carboxylic acids and derivatives	Amino acids, peptides, and analogues	*		46.1	38.9	M-H2O-H	C8H14N2O5S	-0.556266	684.426	579.031	727.058	664.728	693.084	2863.59	897.042	6355.96	1950.54	4002.07	1015.98	568.655	3619.25	1081.19	1639.15	1499.9
2.27_281.1137m/z	281.114	2.26528	pos	Aspartylphenylalanine	HMDB0000706	Organic acids and derivatives	Carboxylic acids and derivatives	Amino acids, peptides, and analogues	***		46.1	35.6	M+H	C13H16N2O5	1.96481	5040.62	4436.95	4641.85	4519.2	4626.83	22433.1	6130.09	3095	19691.3	6452.76	5727.5	3502.11	16071.3	27262.4	2626.61	2461.93
4.51_165.0193m/z	165.019	4.51382	neg	Phthalic acid	HMDB0002107	Benzenoids	Benzene and substituted derivatives	Benzoic acids and derivatives	**	C01606	46.1	33.5	M-H	C8H6O4	-0.475656	17376.2	18504.8	17938.8	19210.9	19635.7	23414.6	18599.4	21148.5	25360.4	21021.7	19637.6	20803.3	22823.9	21334	20316.6	21358.9
7.06_369.2282m/z	369.228	7.0616	neg	TXB2	422	Lipids and lipid-like molecules	Fatty Acyls	Eicosanoids	**	C05963	46.1	35.5	M-H	C20H34O6	-0.154153	102040	104235	104410	109072	105802	31962.5	8120.09	5734.31	32098.8	89009	28093.4	17659.2	398095	79033	95444.6	7486.42
7.68_162.0551m/z	162.055	7.68093	pos	3-Hydroxy-1H-quinolin-4-one	69078	Unclassified	Unclassified	Unclassified			46.1	37.4	M+H	C9H7NO2	1.06052	358.151	425.203	342.14	514.942	347.956	3173.67	962.782	1940.73	4325.38	1919.84	850.331	853.397	1272.64	2269.89	560.115	644.735
1.28_275.0648n	276.072	1.27738	pos	3-beta-D-Glucopyranuronosyloxy-5-methylisoxazole	68848	Unclassified	Unclassified	Unclassified			46	37	M+H-H2O, M+H	C10H13NO8	2.36293	254.036	147.688	168.846	216.935	246.853	708.127	22785.1	5579.85	1172.75	13932	43069.5	24438.6	6152.87	16799.4	6052.6	29156.6
1.36_221.0924m/z	221.092	1.36257	pos	p-Hydroxyl-ethotoin	HMDB0061174	Organoheterocyclic compounds	Azolidines	Imidazolidines	*		46	40	M+H	C11H12N2O3	1.58543	1282.65	1465.37	1294.28	1405.31	1644.99	1331.59	1517.7	583.926	1149.01	676.407	1035.38	1342.4	944.653	713.864	737.76	577.338
10.34_256.1918m/z	256.192	10.3365	neg	N-Lauroylglycine	HMDB0013272	Organic acids and derivatives	Carboxylic acids and derivatives	Amino acids, peptides, and analogues	*		46	33.3	M-H	C14H27NO3	0.000257362	15179.9	14480.4	13597.3	15071.7	12893.1	16818.4	15228.9	16392	16759.5	16553.4	14089.2	15747.3	14325.7	15511.3	14676.1	16751.4
11.24_221.1539m/z	221.154	11.2384	pos	(Z)-6-Tetradecene-1,3-diyne-5,8-diol	93602	Lipids and lipid-like molecules	Fatty Acyls	Fatty alcohols	*		46	37.9	M+H	C14H20O2	1.21992	5021.68	4288.1	4543.47	4860.47	4495.02	4440.03	4288.56	4964.58	5262.85	4840.61	4647.4	4280.72	4183.98	4846.2	3279.38	4635.01
11.28_262.1441m/z	262.144	11.283	pos	Glandulone B	HMDB0038548	Lipids and lipid-like molecules	Prenol lipids	Sesquiterpenoids	*		46	36.3	M+NH4	C15H16O3	1.30946	4708.62	4280.19	4201.13	4170.8	4421.65	5772.47	4009.65	5107.05	4752.02	5233.21	4850.18	4184.92	3793.53	4246.99	2775.51	4711.22
14.77_296.2588m/z	296.259	14.7693	pos	9,12,14-octadecatrienoic acid	LMFA01030151	Lipids and lipid-like molecules	Fatty Acyls	Fatty Acids and Conjugates			46	34.6	M+NH4	C18H30O2	1.27976	250031	267678	305013	321368	323423	287521	256987	320183	312929	307747	306920	263392	239921	319416	213105	304099
3.81_471.1516n	472.159	3.81065	pos	10-Formyldihydrofolate	HMDB0006485	Lipids and lipid-like molecules	Sphingolipids	Phosphosphingolipids	*	C03204	46	38.5	M+H, M+Na	C20H21N7O7	2.94954	22997.8	24718.1	24528.6	23822.1	21182.4	5.88962e-06	175.018	75.5297	5.88962e-06	108.384	193.648	673.978	19.5724	62.4824	5.88962e-06	91.3494
4.87_565.1742m/z	565.174	4.8688	neg	8-Hydroxy-deoxyguanosine	HMDB0003333	Nucleosides, nucleotides, and analogues	Purine nucleosides	Purine 2'-deoxyribonucleosides	*		46	45.6	2M-H	C10H13N5O5	-3.29838	46516.7	51181.4	53930.5	51618.2	54653.7	5.88962e-06	5.88962e-06	5.88962e-06	5.88962e-06	5.88962e-06	40.5074	5.88962e-06	5.88962e-06	236.089	65.0324	97.042
5.55_219.1382m/z	219.138	5.5539	pos	12,13-Dimethyl-5,14-dioxabicyclo[9.2.1]-tetradeca-1(13),11-dien-4-one	LMFA07040039	Lipids and lipid-like molecules	Fatty Acyls	Fatty esters			46	37.9	M+H-H2O	C14H20O3	1.18931	7669.7	7735.6	7941.76	8853.44	8670.31	6382.99	6213.81	4401.85	6188.4	7338.29	7329.14	6687.82	5736.18	7924.48	3408.32	6743.65
7.47_466.1980m/z	466.198	7.46793	pos	Biotripyrrin-a	HMDB0003323	Organoheterocyclic compounds	Pyrroles	Substituted pyrroles	*		46	36.1	M+H	C25H27N3O6	1.48092	3103.68	2682.64	2402.18	2859.22	2519.52	5.88962e-06	3366.54	171.471	5.88962e-06	1298.7	16300.8	12473.2	620.977	1727	628.888	13853.9
9.55_179.1069m/z	179.107	9.54772	pos	2-Ethoxy-5-(1-propenyl)phenol	95265	Benzenoids	Phenol ethers	Unclassified			46	33.9	M+H	C11H14O2	1.16358	45229.8	43504.9	43841.3	44843.2	48024.4	47106.4	32958.3	43755.7	45297.2	39631.3	39843.7	38014.3	36187.4	45168.7	30658.6	44455.5
0.77_210.0376n	191.02	0.769183	neg	D-Glucarate	3343	Organic oxygen compounds	Organooxygen compounds	Carbohydrates and carbohydrate conjugates	**	C00818	45.9	31.3	M-H2O-H, M-H	C6H10O8	0.0919248	287680	308746	316926	342221	317736	14886.9	112078	39766.9	6977.29	66847.6	124985	84404	71624.1	76025.1	68479.1	138988
1.19_104.0533m/z	104.053	1.1916	pos	(±)-2-Methylthiazolidine	HMDB0031682	Organoheterocyclic compounds	Azolidines	Thiazolidines	*		45.9	41.9	M+H	C4H9NS	4.85628	7238.3	7677.65	6154.42	5979.19	8092.38	906.82	4557.2	1528.79	1320.92	2367.93	5397.62	5401.37	5610.28	3647.42	4860.61	2877.26
1.49_317.0990m/z	317.099	1.4902	neg	L-trans-alpha-Amino-2-carboxycyclopropaneacetic acid	HMDB0034442	Organic acids and derivatives	Carboxylic acids and derivatives	Amino acids, peptides, and analogues			45.9	33.2	2M-H	C6H9NO4	-0.160962	2583.26	3020.41	3287.34	2612.14	2897.37	30.4101	2412.7	631.813	221.853	729.488	1848.38	1888.77	3511.92	2663.14	2981.77	7851.26
11.91_352.2618n	375.251	11.9135	pos	MG(0:0/18:3(6Z,9Z,12Z)/0:0)	HMDB0011539	Lipids and lipid-like molecules	Fatty Acyls	Lineolic acids and derivatives	*		45.9	35.6	M+Na, M+K, M+NH4	C21H36O4	1.28101	8293.4	8608.9	9170.46	8594.02	8787.22	12449.6	12127.7	12679.5	10813	16524.3	10441.7	149856	16623.2	33182.3	589841	122475
12.27_649.4336n	650.441	12.2662	pos	1-(2-methoxy-5Z,9Z-hexacosadienyl)-sn-glycero-3-phosphoserine	LMGP03060030	Lipids and lipid-like molecules	Glycerophospholipids	Glycerophosphoserines			45.9	37	M+H, M+Na	C33H64NO9P	2.65147	326113	332786	387401	411569	449273	16151.2	8811.48	7169.09	7715.95	7693.48	7617.74	9874	5849.29	7466.65	85066.3	12278.3
2.86_260.1975m/z	260.198	2.85763	pos	Lysylisoleucine	HMDB0028954	Organic acids and derivatives	Carboxylic acids and derivatives	Amino acids, peptides, and analogues	*		45.9	37.3	M+H	C12H25N3O3	2.47435	346.271	344.832	340.417	265.46	262.56	32.4689	461.404	101.165	134.051	24.4785	192.324	287.544	368.465	187.562	4947.4	416.896
6.34_169.0497m/z	169.05	6.33965	pos	2',3',4'-Trihydroxyacetophenone	85166	Unclassified	Unclassified	Unclassified			45.9	32.6	M+H	C8H8O4	0.801665	1823.1	1658.15	1584.03	1907.8	1727.74	13503.9	10509.7	3237.23	3003.48	4010.46	5185.04	3508.57	2661.64	8487.67	1522.65	22950.2
0.71_268.1635m/z	268.163	0.710867	pos	Lysylvaline	HMDB0028964	Organic acids and derivatives	Carboxylic acids and derivatives	Amino acids, peptides, and analogues	*		45.8	36.1	M+Na	C11H23N3O3	1.18542	13964.6	11288.7	13760.7	13485	13555.7	12034.5	4052.21	6488.18	8837.56	6036.09	6680.05	7915.9	4950.28	8585.16	1506.87	5146.47
0.81_135.0305m/z	135.031	0.805983	neg	Threonic acid	HMDB0000943	Organic oxygen compounds	Organooxygen compounds	Carbohydrates and carbohydrate conjugates	**	C01620	45.8	34.6	M-H	C4H8O5	4.43782	143741	147774	144072	155157	162002	66527	171038	92932.7	75096.8	139382	166076	142931	138426	170664	81223.1	131171
0.87_320.1093m/z	320.109	0.870567	pos	Tetrodotoxin	69159	Unclassified	Unclassified	Unclassified			45.8	37.5	M+H	C11H17N3O8	1.56136	2651.97	2763.19	2571.58	2446.62	3047.34	1300.25	8660.13	2038.56	1232.64	3358.76	8879.78	5851.31	2828.83	5131.88	1604.99	7530.83
1.06_270.1317m/z	270.132	1.06015	pos	3-hydroxybutyrylcarnitine	LMFA07070037	Lipids and lipid-like molecules	Fatty Acyls	Fatty acid esters	*		45.8	35.6	M+Na	C11H21NO5	1.93669	1139.27	1345.28	1143.14	1297.97	1698.21	5.88962e-06	235.314	28.1623	42.2206	73.7572	3256.58	1297.54	5.88962e-06	533.665	122.577	825.116
3.90_231.1708m/z	231.171	3.89823	pos	Isoleucyl-Valine	85825	Organic acids and derivatives	Carboxylic acids and derivatives	Amino acids, peptides, and analogues	*		45.8	36.7	M+H	C11H22N2O3	2.16668	1217.57	1061.97	1037	1581.47	1118.14	1352.85	779.624	667.79	1383.34	807.537	3315.62	2396.54	1655.51	2470.13	2905.85	2570.5
5.12_478.1861m/z	478.186	5.12455	pos	Pralatrexate	85196	Unclassified	Unclassified	Unclassified			45.8	44.3	M+H	C23H23N7O5	5.86329	45541.5	35447.1	37917.9	44878.2	46606.4	886.75	5.88962e-06	5.88962e-06	850.178	250.567	5.88962e-06	5.88962e-06	5.88962e-06	503.222	5.88962e-06	334.566
5.55_286.2016m/z	286.202	5.5539	pos	Bisacurone epoxide	HMDB0038503	Lipids and lipid-like molecules	Prenol lipids	Sesquiterpenoids	*		45.8	34.2	M+NH4	C15H24O4	1.06432	826.421	814.356	769.686	737.854	724.464	9017.75	8961.37	5710.2	2750.5	33609.2	50823.7	26969.2	6149.73	7523.79	9947.64	21399.8
0.71_427.1522m/z	427.152	0.710867	pos	Puerarol	LMPK12090011	Lipids and lipid-like molecules	Polyketides	Flavonoids			45.7	44.9	M+Na	C25H24O5	1.40471	6411.05	7207.56	6446.34	6948.2	7099.97	773.699	40958	9364.54	1354.89	8392.24	18407.8	24878	52291.8	17603.1	46861.4	10159.6
1.41_219.0747n	242.064	1.40547	pos	N-Acetyl-D-mannosaminolactone	66042	Unclassified	Unclassified	Unclassified			45.7	34.8	M+H, M+Na	C8H13NO6	1.71724	8283.49	7798.93	8221.38	8655.49	8538.58	206.982	1530.84	171.588	114.731	875.357	6817.26	5791.85	141.991	1827.98	401.152	2498.08
10.12_175.1484m/z	175.148	10.1189	pos	1,2,3,4,tetrahydro-1,5,7-trimethylnapthalene	96270	Benzenoids	Tetralins	Unclassified			45.7	34.1	M+H	C13H18	1.37455	3893.67	3736.64	3772.53	3910.05	3897.38	3706.91	3685.61	4324.44	4122.9	3762.9	3660.56	3690.02	3410.76	4499.31	2939.08	3907.48
10.57_500.2783m/z	500.278	10.5698	neg	PE(0:0/20:4(5Z,8Z,11Z,14Z))	LMGP02050051	Lipids and lipid-like molecules	Glycerophospholipids	Glycerophosphoethanolamines	*		45.7	31.3	M-H	C25H44NO7P	0.140887	3175.86	2751.89	5190.59	4781.47	4263.05	275538	109888	134593	211505	124588	83301.6	87116.7	125460	103574	184707	84540.1
11.33_398.2440n	421.233	11.3268	pos	Tris(butoxyethyl)phosphate	70068	Unclassified	Unclassified	Unclassified			45.7	33.7	M+H, M+Na	C18H39O7P	1.65081	39586.7	37752	39614.8	43370.8	50509.4	41576	31475.4	42498.8	45086.8	34383.9	40877.4	41239.7	32613.7	47130.6	27501.8	43786
13.22_270.2794m/z	270.279	13.2247	pos	5-Ethyl-2-pentadecen-4-one	LMFA12000264	Lipids and lipid-like molecules	Fatty Acyls	Oxygenated hydrocarbons			45.7	32	M+NH4	C17H32O	0.998698	353364	349534	422470	444582	447712	366017	329657	384680	411280	409536	394388	398086	327746	439104	297568	432629
4.33_446.2046m/z	446.205	4.3343	pos	Neurotensin 11-13	HMDB0013024	Organic acids and derivatives	Carboxylic acids and derivatives	Amino acids, peptides, and analogues	*		45.7	34.3	M+K	C21H33N3O5	-1.39333	1209.84	1407.88	1848.63	1352.85	1616.26	5.88962e-06	2225.7	46.2712	5.88962e-06	357.425	6742.78	15685.8	799.772	4169.12	6835.1	3401.74
4.34_263.1396m/z	263.14	4.34332	pos	Phenylalanylproline	HMDB0011177	Organic acids and derivatives	Carboxylic acids and derivatives	Amino acids, peptides, and analogues	*		45.7	33.9	M+H	C14H18N2O3	2.21206	9923.75	10536.7	10280	11360.8	11019.1	12865.3	11680.2	10913.6	11229	14280.8	11024.7	8711.12	64146.3	13898.5	12989.1	5232.7
5.77_225.1133m/z	225.113	5.77078	neg	Jasmolone	HMDB0030039	Organic oxygen compounds	Organooxygen compounds	Alcohols and polyols	*		45.7	30.9	M+FA-H	C11H16O2	0.317339	6877.27	7098.91	7291.75	7479.74	7276.5	906.683	778.526	772.65	1105.72	841.846	881.15	799.188	953.074	960.838	942.856	809.055
8.49_353.2334m/z	353.233	8.4927	neg	PGF2alpha	LMFA03010002	Lipids and lipid-like molecules	Fatty Acyls	Eicosanoids	**	C00639	45.7	34.1	M-H	C20H34O5	0.0168101	11722.1	11228.2	11648.5	12143.2	12067.9	4679.81	12327	10960.2	8371.47	43548.6	15973.5	34281.7	167699	29062	22691.6	2788.63
0.81_301.0565n	284.053	0.809917	pos	N-Acetylmannosamine-6P	HMDB0062500	Organic oxygen compounds	Organooxygen compounds	Carbohydrates and carbohydrate conjugates			45.6	35.9	M+H-H2O, M+H, M+K	C8H16NO9P	0.898145	14121.7	14113.4	13515.2	9008.03	11656.8	2077.46	42014.4	14102.1	4321.17	27784.5	89944.8	89505.2	14107.5	29047.3	8129.77	49176.3
1.17_111.0199m/z	111.02	1.17223	neg	4-Carboxypyrazole	HMDB0060760	Organoheterocyclic compounds	Azoles	Pyrazoles	*		45.6	32.3	M-H	C4H4N2O2	-0.516807	25330.4	25939.6	27068	30424.2	28529.8	7426.08	9794	8029.72	6456.2	8020.88	9332.06	11004.9	10085.4	11764.7	8165.58	12609.8
1.60_117.0193m/z	117.019	1.60213	neg	Methylmalonic acid	3712	Organic acids and derivatives	Carboxylic acids and derivatives	Dicarboxylic acids and derivatives	**	C02170	45.6	31.2	M-H	C4H6O4	-0.626781	2373.77	2519.86	2596.86	2798.25	2905.14	639.864	472.653	603.219	686.158	532.925	575.354	551.564	500.584	618.329	617.155	689.929
10.14_239.1653m/z	239.165	10.1358	neg	4-(2,6,6-Trimethyl-1-cyclohexen-1-yl)-2-butanone	HMDB0032913	Lipids and lipid-like molecules	Prenol lipids	Sesquiterpenoids	*	C03527	45.6	29	M+FA-H	C13H22O	0.00483984	6659.51	7659.47	7166.75	7522.66	6289.46	545.608	2878.07	2366.83	470.074	2776.01	2868	3986.54	625.215	3831.14	2136.28	4907.1
11.08_235.1695m/z	235.17	11.0838	pos	Dehydrocurdione	HMDB0035407	Lipids and lipid-like molecules	Prenol lipids	Sesquiterpenoids	*	C16949	45.6	32.6	M+H	C15H22O2	1.11181	89036.5	88158.2	84406.6	83750.8	83760.5	115348	79742.7	92690.1	99075.8	84807.4	84025.4	82104.7	69427.3	91016.6	60411	96122
3.90_187.0637n	188.071	3.89823	pos	Indoleacrylic acid	HMDB0000734	Organoheterocyclic compounds	Indoles and derivatives	Indoles	*		45.6	31.7	M+H, M+NH4, M+H-H2O	C11H9NO2	2.04664	983987	977014	1.03752e+06	1.15696e+06	1.02476e+06	254250	517924	172475	203327	181706	628123	672749	372757	185552	353742	323844
4.53_245.1865m/z	245.186	4.53363	pos	Leucyl-Leucine	HMDB0028933	Organic acids and derivatives	Carboxylic acids and derivatives	Amino acids, peptides, and analogues	***	C11332	45.6	33.1	M+H	C12H24N2O3	2.13595	2820.63	2747.2	3850.01	3018.31	3070.5	1885.21	1076.01	801.805	1361.04	1292.79	8752.11	4505.56	2080.23	5457.31	2132.12	3192.3
4.75_141.0557m/z	141.056	4.75245	neg	(E,E)-2,4-Hexadienal	HMDB0034729	Organic oxygen compounds	Organooxygen compounds	Carbonyl compounds			45.6	29.3	M+FA-H	C6H8O	0.021857	10477.1	10767.1	10669.5	11617.7	11561.7	12704.9	10872.2	12150.9	13665.8	11424	11669.4	12354.8	11824.5	12629.7	11887	12345.4
4.80_187.0070m/z	187.007	4.8049	neg	p-Toluenesulfonic acid	HMDB0059933	Benzenoids	Benzene and substituted derivatives	Benzenesulfonic acids and derivatives	***	C06677	45.6	33.8	M-H	C7H8O4S	-0.179898	7153.19	7563.48	9416.6	9077.24	9817.36	9163.28	10553.8	60700	4539.79	100383	706.652	21153.6	7683.06	54395.8	52281.8	29422.6
7.23_212.1647m/z	212.165	7.23227	pos	4,8-Dimethyl-4E,8E-decadien-10-olide	LMFA07040024	Lipids and lipid-like molecules	Fatty Acyls	Fatty esters			45.6	36.2	M+NH4	C12H18O2	1.08684	9193.67	9292.51	9165.22	9782.45	10093.9	9249.12	7528.86	8554.57	9543.62	8200.04	8889.68	8680.88	7113.99	9691.18	6434.34	9075.64
7.30_163.0391m/z	163.039	7.30112	pos	UMBELLIFERONE	44642	Phenylpropanoids and polyketides	Coumarins and derivatives	Hydroxycoumarins	*	C09315	45.6	34	M+H	C9H6O3	0.764175	50882.8	49061.1	50769.6	50665.5	49979.1	46225.9	40602.7	47211.4	47680.7	46202.2	44821.5	42496.1	35455.7	48333.7	32957.4	46012.9
0.83_120.1022m/z	120.102	0.829667	pos	Tetrahydro-2-methyl-3-furanol	HMDB0039799	Organoheterocyclic compounds	Tetrahydrofurans	Unclassified			45.5	33	M+NH4	C5H10O2	2.74743	3153.02	3603.01	3458.82	3049.44	2640.79	150.704	38040.2	12259.7	3212.96	5816.74	15880.6	11607.5	41104.8	17005.9	8196.31	3758.46
0.83_428.0375m/z	428.037	0.829667	pos	Adenosine 2',5'-bisphosphate	66062	Unclassified	Unclassified	Unclassified			45.5	39.2	M+H	C10H15N5O10P2	1.87647	96307.6	106826	126526	125300	122990	87868.2	14505.8	20293.7	66309.9	45832.2	35405.2	23889	38936.5	51771.6	42773.7	51566.5
0.91_217.0830m/z	217.083	0.90975	neg	Glutamylalanine	HMDB0003764	Organic acids and derivatives	Carboxylic acids and derivatives	Amino acids, peptides, and analogues	*		45.5	33.3	M-H	C8H14N2O5	0.0649223	961.394	960.445	1195.23	1001.32	1226.28	365.084	3546.48	701.209	278.857	1622.51	5181.96	3900.47	3270.35	1213.9	2032.22	1813.47
13.93_284.2951m/z	284.295	13.9266	pos	2E,13Z-octadecadien-1-ol	LMFA05000057	Lipids and lipid-like molecules	Fatty Acyls	Fatty alcohols			45.5	32	M+NH4	C18H34O	0.982704	105090	94078.4	76697.1	75024.5	74583.2	109862	80004.9	93826.9	92565.6	88329.9	78767	76879.2	105346	76131.8	73249.7	69117.9
3.74_218.1393m/z	218.139	3.74438	pos	cis-4-Decenedioic acid	HMDB0000603	Lipids and lipid-like molecules	Fatty Acyls	Fatty acids and conjugates	*		45.5	34.1	M+NH4	C10H16O4	3.0022	6378.29	5237.31	5828.9	7095.65	6523.58	2656.8	2888.06	363.958	1098.72	323.404	1823.29	6414.9	380.333	5571.72	285.227	6260.4
4.10_144.0658m/z	144.066	4.09907	pos	Glutamic acid gamma-methyl ester	HMDB0061715	Organic acids and derivatives	Carboxylic acids and derivatives	Amino acids, peptides, and analogues			45.5	34.6	M+H-H2O	C6H11NO4	1.49444	3989.43	3722.96	4129.99	4541.68	4190.98	4771.92	3932.92	4493.2	4758.1	5590.15	4530.94	4138.01	3182.23	4398.47	2789.53	3658.9
4.85_480.2020m/z	480.202	4.85368	pos	Euchrenone b3	LMPK12050325	Lipids and lipid-like molecules	Polyketides	Flavonoids			45.5	38.2	M+NH4	C27H26O7	0.686285	34033.5	29661.7	32189.5	34769.6	37039.9	1340.83	5.88962e-06	55.1965	3086.45	212.378	67.2031	5.88962e-06	47.9762	530.469	92.9192	5.88962e-06
6.56_171.1026m/z	171.103	6.55742	neg	(3xi,5Z)-1,5-Octadien-3-ol	HMDB0030966	Lipids and lipid-like molecules	Fatty Acyls	Fatty alcohols	*		45.5	31.7	M+FA-H	C8H14O	-0.325766	3017.57	3414.84	3640.29	3818.82	4301.26	1062.52	738.405	821.858	1622.43	997.306	664.989	839.816	915.069	1191.15	896.827	765.455
7.61_195.1026m/z	195.103	7.61343	neg	11-oxo-undeca-5,8-dienoic acid	LMFA01060220	Lipids and lipid-like molecules	Fatty Acyls	Fatty Acids and Conjugates			45.5	30.3	M-H	C11H16O3	-0.287518	118.637	99.5224	144.13	151.109	112.719	404.591	4270.79	7155.62	2800.59	5280.17	291.393	3285.69	483.953	1689.74	1723.69	384.253
8.10_221.0819m/z	221.082	8.10345	neg	Piperonyl isobutyrate	HMDB0037130	Organoheterocyclic compounds	Benzodioxoles	Unclassified			45.5	31.4	M-H	C12H14O4	-0.230046	3808.6	3157.02	3589.13	4245.73	4139.41	3987.8	4115.06	4074.99	4252.6	2989.24	4330.61	4020.44	3370.82	4729.76	4941.72	5510.88
8.45_181.1225m/z	181.122	8.44517	pos	Dihydroactinidiolide	90552	Organoheterocyclic compounds	Benzofurans	Unclassified			45.5	31.9	M+H	C11H16O2	0.867269	3409.64	3002.8	3076.14	3136.07	2989.67	2691.87	3621.63	2750.52	3410.72	2960.18	1627.44	2888.31	2260.12	3341.85	2346.09	2591.78
0.81_287.0521m/z	287.052	0.805983	neg	Orotidine	5754	Nucleosides, nucleotides, and analogues	Pyrimidine nucleosides	Unclassified	**	C01103	45.4	37.2	M-H	C10H12N2O8	-0.0181327	39852	38992.8	39700.2	43239.5	45091.9	11531.9	9870.2	4767.05	12711.2	8395.35	13450	5703.16	7709.2	9190.93	2873.13	6574.09
0.83_233.0779m/z	233.078	0.82665	neg	Glycylhydroxyproline	HMDB0011173	Organic acids and derivatives	Carboxylic acids and derivatives	Amino acids, peptides, and analogues	*		45.4	31.1	M+FA-H	C7H12N2O4	-0.199043	12241.7	13201.4	13091.7	13932	14878.2	3404.64	6233.98	2349.51	2551.27	2790.31	4658.16	3996.39	8111.14	4307.87	4410.7	3293.39
1.45_253.1187m/z	253.119	1.4499	pos	Alanyl-Tyrosine	85614	Organic acids and derivatives	Carboxylic acids and derivatives	Amino acids, peptides, and analogues	*		45.4	34.1	M+H	C12H16N2O4	1.63983	326.822	328.514	397.691	281.532	370.371	28.942	400.365	285.886	251.741	261.513	732.569	598.135	1438.72	508.735	1904.04	530.839
1.76_160.0615m/z	160.062	1.75767	neg	Glucosamine	HMDB0001514	Organic oxygen compounds	Organooxygen compounds	Carbohydrates and carbohydrate conjugates	**	C00329	45.4	30.4	M-H2O-H	C6H13NO5	-0.103512	3850.88	4229.9	4395.6	4426.79	4568.77	135.931	1796.19	123.253	155.339	603.246	2199.01	2449.81	569.539	1074.23	695.855	1099.73
10.22_166.0632n	167.07	10.2242	pos	L-3-Phenyllactic acid	HMDB0000748	Phenylpropanoids and polyketides	Phenylpropanoic acids	Unclassified	***	C05607	45.4	30.5	M+H-H2O, M+H	C9H10O3	1.07464	32096.2	33903.7	34034.3	34893.9	39694.6	32492.2	32579.9	32677.5	36974.1	29220.3	29434.9	27580.1	22989.2	29414.8	23178.7	32579
10.85_452.2783m/z	452.278	10.8466	neg	1-(2-methoxy-6Z-pentadecenyl)-sn-glycero-3-phosphoethanolamine	LMGP02060012	Lipids and lipid-like molecules	Glycerophospholipids	Glycerophosphoethanolamines			45.4	29.1	M-H	C21H44NO7P	0.104247	86565.4	94622.6	88336	83989.5	74727.5	128488	72154.7	133024	81026.5	84697	54739.6	50752.8	67775.7	58210	58430.9	30705.8
11.11_293.2122m/z	293.212	11.1102	neg	Sterol	HMDB0060512	Lipids and lipid-like molecules	Steroids and steroid derivatives	Hydroxysteroids	*	C00370	45.4	29.9	M+FA-H	C17H28O	-0.183361	54396.1	53596.4	46979.4	52899.8	52022	2811.42	832.756	2367.97	3083.82	4332.67	2177.64	1679.68	1656.37	2540.21	2019.77	1383.35
14.09_292.2767n	310.311	14.0942	pos	Geranylcitronellol	HMDB0032147	Lipids and lipid-like molecules	Prenol lipids	Diterpenoids	*		45.4	30.3	M+H, M+NH4	C20H36O	0.385566	86578.4	86372	87344	75890	79492.2	322207	42973.1	90840.3	222681	88834.8	162769	107312	402419	300786	29993.3	335752
4.43_252.1236m/z	252.124	4.42893	pos	Artemidiol	HMDB0030648	Phenylpropanoids and polyketides	Isocoumarins and derivatives	Unclassified	*		45.4	32.8	M+NH4	C13H14O4	2.2976	5213.18	7773.14	6033.37	8745.12	6819.57	7326.61	3283.28	453.973	1834.31	870.957	1607.31	5530.15	803.236	9822.52	189.049	5320.6
5.54_146.0602m/z	146.06	5.53518	pos	Isocarbostyril	66365	Unclassified	Unclassified	Unclassified			45.4	33.3	M+H	C9H7NO	0.90532	1479.75	1405.6	1404.69	1662.58	1764.99	1890.3	968.25	1194.15	2760.11	1820.83	945.798	1210.51	1263.49	2611.56	620.808	1880.41
1.27_451.1100m/z	451.11	1.26567	neg	Nitrotyrosine	HMDB0255667	Organic acids and derivatives	Carboxylic acids and derivatives	Amino acids, peptides, and analogues	*		45.3	36.1	2M-H	C9H10N2O5	-1.52071	17687.6	22525.2	20215.2	22208	22828.8	1709.01	24042.4	2858.69	1532.24	6842.63	19061.9	19093.9	31083	11698	22783.3	11984
10.73_262.2300n	280.264	10.7278	pos	2-(5,8-Tetradecadienyl)cyclobutanone	HMDB0037519	Organic oxygen compounds	Organooxygen compounds	Carbonyl compounds			45.3	33	M+H, M+NH4, M+H-H2O	C18H30O	1.21692	570964	567316	506184	507012	524848	650024	535647	573337	648435	518796	536945	500183	427800	571737	347575	559770
11.08_478.2938m/z	478.294	11.0767	neg	PE(0:0/18:1(11Z))	LMGP02050039	Lipids and lipid-like molecules	Glycerophospholipids	Glycerophosphoethanolamines			45.3	29.2	M-H	C23H46NO7P	-0.197762	93356	83209.5	77062.7	80121.5	76461.6	135284	88602.6	101810	98121.5	84587.4	85849.5	91726	61858.4	55278	71741.6	53827.5
11.38_322.2504n	321.243	11.3753	neg	12(S)-HETrE	HMDB0062747	Lipids and lipid-like molecules	Fatty Acyls	Eicosanoids	*		45.3	31.7	M-H2O-H, M-H	C20H34O3	-1.15965	16211.7	17201	16689.8	18017.8	16755.7	11480.4	82570.2	29107.1	29714.4	144732	35194.6	24375.1	511874	89185.6	33299.4	12944.7
13.01_247.1668m/z	247.167	13.0065	pos	S-cucujolide III	LMFA07040046	Lipids and lipid-like molecules	Fatty Acyls	Fatty esters			45.3	31.6	M+Na	C14H24O2	-0.172726	151075	147643	164952	157577	162124	166084	141014	160602	177827	166090	162248	156984	134559	160312	102040	157933
2.33_125.0243m/z	125.024	2.32633	neg	5-Hydroxymethyl-2-furancarboxaldehyde	HMDB0034355	Organic oxygen compounds	Organooxygen compounds	Carbonyl compounds		C11101	45.3	33.2	M-H	C6H6O3	-0.563975	2134.42	2043.52	2102.91	2259.86	2382.09	413.244	320.98	374.988	449.247	316.612	424.787	341.765	335.097	359.583	376.082	352.481
4.19_341.1613n	342.169	4.18713	pos	PC(0:0/5:0)	LMGP01050091	Lipids and lipid-like molecules	Glycerophospholipids	Glycerophosphocholines			45.3	34.1	M+H, M+Na	C13H28NO7P	2.71221	9761.47	7895.45	8072.63	7836.05	8115.35	5.88962e-06	5.88962e-06	47.3428	113.592	46.9103	5.88962e-06	34.8556	5.88962e-06	5.88962e-06	5.88962e-06	5.88962e-06
4.34_188.0928m/z	188.093	4.34083	neg	N-Lactoylvaline	HMDB0062181	Organic acids and derivatives	Carboxylic acids and derivatives	Amino acids, peptides, and analogues			45.3	28.6	M-H	C8H15NO4	-0.168226	14580.2	14239.9	16188	20390.4	16258.1	963.828	12876.8	1846.59	1686.19	4896.93	23674.6	16481.8	5545.04	8900.78	5694.46	5391.69
5.67_228.1241m/z	228.124	5.66657	neg	Methyprylon	HMDB0015239	Organoheterocyclic compounds	Piperidines	Piperidinones			45.3	28.8	M+FA-H	C10H17NO2	-0.375342	6319.57	6498.83	6124.09	6885.75	7384	93.0516	5.88962e-06	5.88962e-06	17.4645	19.1886	22.9221	21.8582	5.88962e-06	38.9117	36.6014	17.3299
10.97_295.2515n	318.241	10.9725	pos	(4E,8E,10E-d18:3)sphingosine	LMSP01080013	Lipids and lipid-like molecules	Sphingolipids	Sphingoid bases			45.1	31.3	M+Na, M+K, M+H	C18H33NO2	1.31876	461142	463911	444934	469479	514509	468287	372361	457559	496831	429966	413087	455588	374775	483256	333316	490943
11.24_277.1444m/z	277.144	11.2376	neg	6-[(3,4-Methylenedioxy)phenyl]-3,3-dimethyl-1-hexene	HMDB0030790	Organoheterocyclic compounds	Benzodioxoles	Unclassified	*		45.1	29.1	M+FA-H	C15H20O2	-0.62994	977.412	1186.87	814.287	1013.79	878.99	2996.17	4577.95	1120.48	19903.7	9313.73	1057.32	1463.75	1085.76	1339.93	1646.5	1461.71
12.08_464.3143m/z	464.314	12.0802	neg	PE(P-18:0/0:0)	LMGP02070002	Lipids and lipid-like molecules	Glycerophospholipids	Glycerophosphoethanolamines			45.1	31.8	M-H	C23H48NO6P	-0.667674	8618.16	8449.19	8388.39	6881.22	7587.1	70456.6	110583	78925.7	53156.4	56946.5	70049.2	68759.2	100188	59477.6	87100	27456.8
14.73_293.1792m/z	293.179	14.7303	neg	Sodium Tetradecyl Sulfate	HMDB0014607	Organic acids and derivatives	Organic sulfuric acids and derivatives	Sulfuric acid esters			45.1	31.4	M-H	C14H30O4S	0.085954	161397	174212	167991	182923	176698	202637	169707	196520	210175	174713	176915	173671	182225	193918	186681	183107
6.81_183.0046m/z	183.005	6.81108	neg	2,4-DINITROPHENOL	43994	Unclassified	Unclassified	Unclassified			45.1	31.3	M-H	C6H4N2O5	-0.624079	10555.7	10362.4	10397.9	11806	12120.7	11442.3	9989.71	11411.8	12551.5	10429.5	9583.51	10692	11552.4	11815.7	12113.3	11655
2.82_280.1298m/z	280.13	2.82328	pos	Phenylalanylasparagine	HMDB0028990	Organic acids and derivatives	Carboxylic acids and derivatives	Amino acids, peptides, and analogues	*		45	33.2	M+H	C13H17N3O4	2.38557	291.841	332.976	239.55	336.392	378.541	5.88962e-06	1567.05	31.7632	5.88962e-06	126.769	8799.95	5484.07	3575.66	2265.64	4281.93	6836.2
3.25_218.1391m/z	218.139	3.25135	pos	cis-5-Decenedioic acid	HMDB0013227	Lipids and lipid-like molecules	Fatty Acyls	Fatty acids and conjugates	*		45	30.1	M+NH4	C10H16O4	2.14926	5442.15	5803.47	5897.97	6024.25	6196.41	4250.18	2401.62	439.987	961.631	699.641	1543.87	4512.93	604.975	6271.96	408.672	4832.07
4.14_236.1166n	237.124	4.14067	pos	Phenylalanylalanine	HMDB0028988	Organic acids and derivatives	Carboxylic acids and derivatives	Amino acids, peptides, and analogues	*		45	30.1	M+H, M+Na	C12H16N2O3	2.01397	2872.91	2233.84	2400.11	1952.26	2717.87	257.374	906.027	138.738	132.075	121.303	4263.53	3146.38	1584.67	1465.65	1173.43	2894.6
4.79_412.2102m/z	412.21	4.78533	pos	Dodecanedioylcarnitine	HMDB0013327	Organic acids and derivatives	Carboxylic acids and derivatives	Tricarboxylic acids and derivatives	*		45	32	M+K	C19H35NO6	1.6822	7732.28	9967.19	9242.04	8577.22	9989.09	162.364	48.4246	83.6751	203.354	235.919	55.8807	53.8497	5.88962e-06	298.678	0.342545	158.996
4.81_163.0401m/z	163.04	4.8138	neg	Phenylpyruvic acid	328	Benzenoids	Benzene and substituted derivatives	Phenylpyruvic acid derivatives	**	C00166	45	28.9	M-H	C9H8O3	-0.0420876	1810.37	1812.53	1763.42	1741.6	1808.89	1881.61	2720.01	3889.81	1975.57	2886.66	1875.54	1646.09	21017.3	30179.2	10182.2	4913.15
5.04_136.0890n	137.096	5.04318	pos	p-Isopropylphenol	87686	Benzenoids	Benzene and substituted derivatives	Cumenes	*		45	29.1	M+H, M+H-H2O	C9H12O	1.13556	9954.18	9261.93	8964.63	9962.63	10140.4	9479.32	7533.73	8656.42	9304.37	8456.58	8207.47	7844.41	6512.29	9092.24	5228	9567.9
6.84_194.1309n	212.165	6.84053	pos	Parcoblattalactone	LMFA07040066	Lipids and lipid-like molecules	Fatty Acyls	Fatty esters			45	28.9	M+H, M+NH4, M+H-H2O	C12H18O2	1.15808	81725.9	75526.4	77909.5	85558.6	87115	72983.2	66114.2	73679.9	74725.8	70485.4	71414.6	72135.8	61075.1	79977.6	52931.1	79284.7
1.08_363.0586n	364.066	1.08162	pos	Guanosine 3'-phosphate	63402	Nucleosides, nucleotides, and analogues	Purine nucleosides	Unclassified	**	C06193	44.9	29.8	M+H, M+Na	C10H14N5O8P	1.54448	428664	439073	415350	431029	431929	37592.9	1600.91	3582.6	43287.2	7893.35	6774.7	6076.08	4452.59	38882	3644.05	19966.8
1.15_156.0771m/z	156.077	1.14785	pos	3-(Pyrazol-1-yl)-L-alanine	65565	Unclassified	Unclassified	Unclassified			44.9	34.5	M+H	C6H9N3O2	2.02263	3000.18	2353.08	3262.71	3207.9	3015.13	1972.77	2163.4	1507.9	2107.21	2668.98	2461.8	2303.89	4292.23	2116.66	1077.3	2175.66
1.19_203.1161n	204.123	1.1916	pos	DL-Acetylcarnitine	HMDB0240773	Lipids and lipid-like molecules	Fatty Acyls	Fatty esters	**	C02571	44.9	28.1	M+H, M+Na	C9H17NO4	1.5793	719320	756210	607642	661522	929692	367624	606477	308112	282010	486490	1.19337e+06	833436	196779	559964	432580	914058
1.21_216.1114n	217.119	1.21112	pos	Threoninyl-Proline	85962	Organic acids and derivatives	Carboxylic acids and derivatives	Amino acids, peptides, and analogues	*		44.9	31.5	M+H, M+Na	C9H16N2O4	1.80997	2931.25	3403.14	2209.09	1825.31	2474.96	415.311	5964.2	1592.69	860.047	1279.11	3917.59	3971.77	21218.2	2447.48	17585.9	1393.66
2.23_433.1228m/z	433.123	2.232	neg	Sulfinpyrazone sulfide	HMDB0060943	Organosulfur compounds	Thioethers	Aryl thioethers	*		44.9	37.7	M+FA-H	C23H20N2O2S	0.240975	12217.4	11758.2	11516.7	12866.8	13389.2	1165.19	13015.1	3486.77	1518.67	5943.77	15248.3	16620.6	8761.39	14990.3	10084	25358.7
3.57_202.1555m/z	202.155	3.56655	pos	N-(3-acetamidopropyl)pyrrolidin-2-one	HMDB0061384	Organoheterocyclic compounds	Pyrrolidines	N-alkylpyrrolidines			44.9	33.9	M+NH4	C9H16N2O2	2.61673	46374.8	45218.8	45397.5	48044	47832.2	53424.2	30920.6	48239	47079.3	47326.6	41926.5	38425	20706	39704.2	17977.6	39611.9
4.64_313.0859m/z	313.086	4.64182	pos	Epithienamycin B	71661	Unclassified	Unclassified	Unclassified			44.9	34.7	M+H	C13H16N2O5S	1.86969	186.684	188.127	176.256	253.974	173.653	529.285	7434.56	1401.95	611.547	341.189	5825.08	3576.12	2563.32	4146.48	176.296	1248.99
4.75_152.0840n	170.118	4.7531	pos	3-Isopropylcatechol	65552	Unclassified	Unclassified	Unclassified			44.9	29.8	M+H, M+NH4, M+H-H2O	C9H12O2	1.91337	73367.1	82497.5	85421.9	76458.7	97270.6	78619.6	64180.3	75911.5	79777.8	73618.8	67488.2	76714.1	47340.2	85530.1	41005	85003.8
4.81_209.0455m/z	209.046	4.8138	neg	Vanilpyruvic acid	HMDB0011714	Benzenoids	Benzene and substituted derivatives	Phenylpyruvic acid derivatives	*		44.9	26.5	M-H	C10H10O5	-0.1214	73805.5	81689.8	77208.9	83910.4	95472.5	102972	94733.9	107464	115722	97444.9	94452.5	96613.1	107607	103650	99041.6	113559
6.75_161.0962m/z	161.096	6.75283	pos	5-Phenylvaleric acid	HMDB0002043	Lipids and lipid-like molecules	Fatty Acyls	Fatty acids and conjugates			44.9	30.8	M+H-H2O	C11H14O2	0.842965	643.725	681.516	749.792	690.344	787.726	658.735	817.065	852.339	610.629	1060.57	764.002	790.252	2194.34	792.323	700.658	653.535
7.24_243.1836n	226.18	7.244	pos	N-Undecanoylglycine	HMDB0013286	Organic acids and derivatives	Carboxylic acids and derivatives	Amino acids, peptides, and analogues	*		44.9	28.1	M+H-H2O, M+H, M+Na	C13H25NO3	0.714129	148846	146700	137698	158000	154677	138707	124745	126002	132696	137361	143804	124879	116846	202298	124923	140952
7.38_252.1595m/z	252.159	7.37553	pos	Tetranor-8-NO2-CLA	LMFA01120009	Lipids and lipid-like molecules	Fatty Acyls	Fatty Acids and Conjugates			44.9	30	M+H-H2O	C14H23NO4	0.147231	5516.42	5213.43	5754.59	5492.74	5921.39	923.717	960.59	876.928	988.797	801.085	1650.63	768.579	605.569	708.511	456.524	719.003
1.00_203.0188m/z	203.019	0.998567	neg	Daucic acid	HMDB0031665	Organic acids and derivatives	Hydroxy acids and derivatives	Beta hydroxy acids and derivatives	*		44.8	33.4	M-H	C7H8O7	-4.3723	5244.42	5809.04	5997.29	6238.49	6437.34	3120.55	9783.06	6692.29	4743.27	8086.17	9103.87	9225	9462.91	7033.84	3867.96	9463.58
1.11_459.0535m/z	459.053	1.10818	neg	4-Methoxyglucobrassicin	HMDB0303668	Unclassified	Unclassified	Unclassified			44.8	42.9	M-H2O-H	C17H22N2O10S2	-0.536308	21269.2	23319.2	21659.7	21510.1	23095.2	6833.56	75.0923	242.725	9849.69	178.027	10.4251	5.88962e-06	243.615	3495.33	149.255	5.88962e-06
1.19_163.1232m/z	163.123	1.1916	pos	L-Nicotine	1526	Organoheterocyclic compounds	Pyridines and derivatives	Pyrrolidinylpyridines	**	C00745	44.8	30.9	M+H	C10H14N2	1.21246	343.226	393.288	330.544	268.589	301.497	5458.2	4943.17	3911.41	2191.85	2777.04	2307.58	1686.69	2054.66	3831.53	3985.33	4698.41
5.41_679.3555m/z	679.355	5.40905	pos	OKOHA-PS	LMGP20040025	Lipids and lipid-like molecules	Glycerophospholipids	Oxidized glycerophospholipids			44.8	36.4	M+NH4	C31H52NO12P	-1.57853	5145.85	4456.03	4771.58	5935.03	5618.32	5.88962e-06	11861.1	2036.95	564.456	3969.51	10822.8	4632.97	12557.4	5251.76	5746.93	10717.7
9.28_295.1087m/z	295.109	9.28227	neg	Arborine	HMDB0030351	Organoheterocyclic compounds	Diazanaphthalenes	Benzodiazines	*	C10642	44.8	26.6	M+FA-H	C16H14N2O	-0.392097	180.259	337.605	230.806	241.737	249.509	5190.62	5229.67	5201.83	9188.77	4205.44	2464.16	4536.74	4700.22	4944.19	1988.6	1626.58
9.84_373.1990m/z	373.199	9.83993	pos	Oryzalic acid A	HMDB0037593	Organoheterocyclic compounds	Oxanes	Unclassified	*		44.8	29.8	M+Na	C20H30O5	1.16754	7311.48	6512.98	7067.83	6515.08	7014.13	98.4961	43.0761	220.802	96.8342	153.244	250.494	40.3297	273.047	130.377	87.594	60.9437
0.75_213.0750m/z	213.075	0.752033	pos	D-Arginine	HMDB0003416	Organic acids and derivatives	Carboxylic acids and derivatives	Amino acids, peptides, and analogues	**	C00792	44.7	27.9	M+K	C6H14N4O2	1.06935	7859.09	7023.88	7736.05	7803.77	9442.07	2716.34	26648.6	5566.25	4105.08	14055.4	38166.3	24633.6	15389.2	19561.2	6537.12	14084.3
0.79_267.0965n	290.087	0.791433	pos	Deoxyguanosine	HMDB0000085	Nucleosides, nucleotides, and analogues	Purine nucleosides	Purine 2'-deoxyribonucleosides	**	C00330	44.7	32.3	M+H, M+Na	C10H13N5O4	-1.03687	29187.9	32525.5	30640	34841.4	31724.6	1231.5	1351.31	2679.61	410.902	5522	1620.37	1759.25	2331.58	1288.25	803.457	5260.82
0.87_332.1101m/z	332.11	0.868767	neg	N-Ribosylhistidine	HMDB0002089	Organic acids and derivatives	Carboxylic acids and derivatives	Amino acids, peptides, and analogues	*		44.7	31.9	M+FA-H	C11H17N3O6	0.736836	603.809	497.873	358.16	455.886	351.071	394.285	3904.24	1366.19	993.489	1907.39	3298.5	2073.13	2774.11	1423.83	1.46624	1802.62
0.89_252.0540m/z	252.054	0.8917	pos	Hydroxytyrosol 3'-sulfate	HMDB0240530	Organic acids and derivatives	Organic sulfuric acids and derivatives	Arylsulfates			44.7	33.6	M+NH4	C8H10O6S	1.53064	24053.9	21802.6	20885.9	21387.8	23775.1	5.88962e-06	591.721	154.038	5.88962e-06	5.88962e-06	970.89	126.041	5.88962e-06	5.88962e-06	35.8196	5.88962e-06
1.17_130.0509m/z	130.051	1.17223	neg	2-Pyrrolidinone	HMDB0002039	Organoheterocyclic compounds	Pyrrolidines	Pyrrolidones	*	C11118	44.7	27.4	M+FA-H	C4H7NO	-0.895754	2384.83	2706.01	3175.87	3099.3	2890.74	874.651	1540.66	928.628	744.691	983.413	3325.2	1583.25	822.886	1549.19	1250	2415.01
1.28_213.1237m/z	213.124	1.27738	pos	L-prolyl-L-proline	62027	Organic acids and derivatives	Carboxylic acids and derivatives	Amino acids, peptides, and analogues	*		44.7	28	M+H	C10H16N2O3	1.53495	40065.4	38668.7	38455.3	38977.2	40608.7	2203.38	30163.5	4058.33	4690.04	5260.38	32024.2	19442	31976	10283.4	20080.2	5090.05
12.13_466.3301m/z	466.33	12.1282	neg	PE(O-18:0/0:0)	LMGP02060003	Lipids and lipid-like molecules	Glycerophospholipids	Glycerophosphoethanolamines			44.7	29.1	M-H	C23H50NO6P	-0.423661	43107	39826.7	40959.4	38156.3	37072.8	4294.49	3612.84	2034.69	1247.32	1815.34	1205.87	2183.5	2155.57	1214.59	1099.86	123.113
4.45_233.1030m/z	233.103	4.44927	neg	2,3-Butanediol glucoside	HMDB0040822	Organic oxygen compounds	Organooxygen compounds	Carbohydrates and carbohydrate conjugates			44.7	26.4	M-H2O-H	C10H20O7	-0.303993	300.313	346.364	334.438	428.666	370.378	5459.24	432.709	845.27	399.779	905.347	4046.67	669.077	11886.5	6596.31	1517.11	16400
4.60_242.0925n	243.1	4.59823	pos	beta-Lapachone	68281	Unclassified	Unclassified	Unclassified			44.7	39.7	M+H, M+Na	C15H14O3	-7.40214	119770	117017	114677	118365	121474	84294	78766.9	94124.1	174374	149097	86605.4	83323	44460.6	90957.6	39263.8	70450.4
5.09_518.2176m/z	518.218	5.08617	pos	Hydroxyergometrine glucoronide M2	2569	Unclassified	Unclassified	Unclassified			44.7	41.2	M+H	C25H31N3O9	8.23605	77034.1	66641.1	61111.4	70780.6	70760.6	4925.68	5.88962e-06	5.88962e-06	30175.1	706.862	5.88962e-06	9.4515	1357.13	19507.7	45.9152	5.88962e-06
5.81_331.2053m/z	331.205	5.80613	pos	N-(3-oxo-dodecanoyl)-homoserine thiolactone	LMFA08020241	Lipids and lipid-like molecules	Fatty Acyls	Fatty amides			44.7	29.3	M+NH4	C16H27NO3S	0.948577	20476.1	23775.4	19505.2	20110.9	20042.3	10882.5	40807.7	18593.7	9262.97	12563.5	29195.6	18615.3	27809.2	46332.9	11398.2	33080.8
5.92_111.0808m/z	111.081	5.92255	pos	3-Methyl-2-cyclohexen-1-one	87750	Organic oxygen compounds	Organooxygen compounds	Carbonyl compounds	*		44.7	28.8	M+H	C7H10O	3.36207	13267.9	13293.6	13468.6	14757.6	15331.7	12152.9	11397.2	12546.8	13138.9	12813.3	12618.2	12331.4	10784.3	13963.3	9520.16	13553.2
6.14_267.0800m/z	267.08	6.141	pos	Tyrosyl-Cysteine	HMDB0029102	Organic acids and derivatives	Carboxylic acids and derivatives	Amino acids, peptides, and analogues	*		44.7	29.6	M+H-H2O	C12H16N2O4S	0.890554	514.584	484.79	582.196	575.989	600.012	247.833	12121.7	1546.42	858.68	473.859	8309.75	5161.06	5082.99	5891.62	923.855	2487.21
8.79_290.2692m/z	290.269	8.7894	pos	9-methoxy-pentadecanoic acid	LMFA01080013	Lipids and lipid-like molecules	Fatty Acyls	Fatty Acids and Conjugates			44.7	28	M+NH4	C16H32O3	0.987476	11540.3	10520.6	10510.9	9994.83	10912.9	7228.88	6505.69	7231.09	7201.93	6803.59	7614.76	6757.17	5610.25	8010.71	5217.59	7405.32
9.91_235.1695m/z	235.17	9.91352	pos	Dihydroisoalantolactone	91124	Lipids and lipid-like molecules	Prenol lipids	Terpene lactones	*		44.7	30.2	M+H	C15H22O2	1.21166	16472.5	16384.6	14912.7	16031.3	16207.7	15375.4	13453.4	15834.9	15080.8	13813	13627.7	12960.2	12857	16169	10979.4	15141
0.70_225.0994m/z	225.099	0.697283	neg	Alanyl-Histidine	HMDB0304775	Organic acids and derivatives	Carboxylic acids and derivatives	Amino acids, peptides, and analogues	*		44.6	34.5	M-H	C9H14N4O3	0.244637	4673.07	4043.29	6568.88	4216.32	5745.8	129.702	51.7208	17.6144	267.07	75.2198	224.683	217.213	438.967	327.261	610.019	469.4
0.70_239.1150m/z	239.115	0.697283	neg	Homocarnosine	HMDB0000745	Organic acids and derivatives	Peptidomimetics	Hybrid peptides	**	C00884	44.6	35.4	M-H	C10H16N4O3	0.213934	4708.08	4186.91	6019.23	4087.25	5542.53	5.88962e-06	603.723	5.88962e-06	22.2196	17.2988	95.6698	122.687	2148.99	317.362	604.418	976.755
0.87_229.1186m/z	229.119	0.870567	pos	Prolylhydroxyproline	HMDB0006695	Organic acids and derivatives	Carboxylic acids and derivatives	Amino acids, peptides, and analogues	***		44.6	29.3	M+H	C10H16N2O4	1.50703	27973.9	29447.7	27447.6	29144.7	32676	592.814	7408.46	1751.42	783.027	5562.89	24925.3	46683.8	1563.94	4193.98	2014.34	20583.2
4.76_128.1206n	111.117	4.7622	pos	(R)-Sulcatol	HMDB0030030	Lipids and lipid-like molecules	Fatty Acyls	Fatty alcohols	*	C07288	44.6	28.7	M+H-H2O, M+H	C8H16O	3.52475	11963	17235.4	18728.1	11199.6	17807.3	11723.1	5170.51	10554.1	9677.38	9160.26	4611.21	6148.43	3776.54	6531.52	3749.46	7484.86
5.38_240.1497m/z	240.15	5.38145	pos	Anatalline	64434	Unclassified	Unclassified	Unclassified			44.6	26.5	M+H	C15H17N3	0.640609	2178.98	2153.69	2421.98	2177.17	2610.26	1249.84	1498.02	855.501	1249.75	4463.01	1078.8	910.144	846.602	2427.94	989.634	59551.4
9.41_334.2356m/z	334.236	9.41052	pos	N-tetradecanoyl-homoserine lactone	LMFA08030038	Lipids and lipid-like molecules	Fatty Acyls	Fatty amides			44.6	28	M+Na	C18H33NO3	1.01159	308682	304834	304817	315215	318161	299173	264502	297329	315201	265833	289342	278743	245411	311187	216380	303875
0.81_274.1044m/z	274.104	0.805983	neg	Prolyl-Asparagine	HMDB0029012	Organic acids and derivatives	Carboxylic acids and derivatives	Amino acids, peptides, and analogues	*		44.5	27.2	M+FA-H	C9H15N3O4	-0.185857	1015.19	1004.29	968.351	726.015	1053.88	1072.01	14677.6	4712.66	1535.19	11420.7	21429.7	12864	12723.1	7886.46	6290.67	13170.3
0.81_323.0521n	324.059	0.809917	pos	5'-CMP	3452	Nucleosides, nucleotides, and analogues	Pyrimidine nucleotides	Pyrimidine ribonucleotides	**	C00055	44.5	26.8	M+H, M+Na	C9H14N3O8P	0.923307	177383	198488	202779	196083	199065	8074.1	29460.4	18860.6	5953.26	33012.8	78052.2	61960.7	15086.8	49936.9	10475.2	79091.3
0.83_354.0776m/z	354.078	0.829667	pos	2,5-Diamino-6-hydroxy-4-(5'-phosphoribosylamino)-pyrimidine	3496	Unclassified	Unclassified	Unclassified			44.5	36.6	M+H	C9H16N5O8P	-9.49335	9022.69	6423.87	6659.67	7875.95	7867.82	4612.05	16364.9	6718.17	7821.3	4022.35	37740.1	40855.8	8511.89	9783.69	9396.47	12036
10.95_341.2073m/z	341.207	10.9505	pos	Perindoprilat	1798	Organic acids and derivatives	Carboxylic acids and derivatives	Amino acids, peptides, and analogues	*		44.5	26.3	M+H	C17H28N2O5	0.728429	7161.37	8476.99	6862.08	7070.96	7159.61	2443.06	1816.82	1650.83	4374.67	4652.83	1595.19	1075.31	8731.04	5487.14	2041.58	1338.37
3.50_215.0811n	216.088	3.49665	pos	N-(furan-2-ylmethyl)-1H-pyrazolo[3,4-d]pyrimidin-4-amine	96290	Unclassified	Unclassified	Unclassified			44.5	30.8	M+H, M+Na	C10H9N5O	1.85659	237.815	276.542	218.131	318.653	320.778	214.728	266.093	207.597	554.572	325.061	203.682	456.535	135.907	5428.73	93.2698	14193.7
3.74_202.1324n	203.14	3.74438	pos	Leu Ala	44685	Unclassified	Unclassified	Unclassified			44.5	29.6	M+H, M+Na	C9H18N2O3	3.40758	5477.97	4465.09	5426.73	5547.13	4920.28	498.942	1509.88	879.774	735.181	557.201	6166.59	6406.28	1442.81	2022.5	1305.81	2264.48
5.25_191.0583n	381.107	5.25265	neg	5-Phenyl-1,3-oxazinane-2,4-dione	HMDB0060400	Benzenoids	Benzene and substituted derivatives	Unclassified	**	C16596	44.5	29.3	M-H, 2M-H	C10H9NO3	0.0920477	1188.3	1300.45	1395.63	1398.68	1587.99	25864.5	11439.7	18355.1	33677.4	13016.2	9869.52	7824.46	11245.7	14021.4	7004.47	7709.71
9.72_370.2956m/z	370.296	9.72485	pos	MG(0:0/18:3(9Z,12Z,15Z)/0:0)	HMDB0011540	Lipids and lipid-like molecules	Fatty Acyls	Lineolic acids and derivatives	*		44.5	29.1	M+NH4	C21H36O4	1.13449	5519.86	4823.65	4678.64	5247.02	5422.5	4084.31	12560.7	3844.01	4502.28	18829.7	148876	84032.6	3780.53	27496.3	5225.28	33984.8
0.73_189.1600m/z	189.16	0.7301	pos	Nε,Nε,Nε-Trimethyllysine	44794	Unclassified	Unclassified	Unclassified			44.4	25.2	M+H	C9H20N2O2	1.06424	68492.5	69781	71030	70729.2	72994.5	91633.1	56841.5	35226.7	116647	32057.5	31983.8	35023.1	79758.4	39028.6	45457.5	17361.2
0.79_399.0949m/z	399.095	0.78745	neg	Biflorin	HMDB0002336	Organic oxygen compounds	Organooxygen compounds	Carbohydrates and carbohydrate conjugates		C08996	44.4	31.5	M+FA-H	C16H18O9	4.56343	249687	261676	234493	273433	242114	343.245	1265.14	5.88962e-06	827.782	2181.14	3786.64	2521.52	5.88962e-06	1669.86	5.88962e-06	1567.51
0.85_246.0909m/z	246.091	0.84955	pos	Asparaginyl-Methionine	HMDB0028737	Organic acids and derivatives	Carboxylic acids and derivatives	Amino acids, peptides, and analogues	*		44.4	26.3	M+H-H2O	C9H17N3O4S	0.819166	17660.1	14391.6	10950.6	9468.44	9362.17	15103.5	14261.7	19491.1	39337.5	7990.73	9262.51	8531.23	12528.7	12676.7	4542.51	8180.07
0.87_166.0179m/z	166.018	0.868767	neg	N-Acetyltaurine	HMDB0240253	Organic acids and derivatives	Organic sulfonic acids and derivatives	Organosulfonic acids and derivatives			44.4	32.3	M-H	C4H9NO4S	-0.493581	23065.5	24109.4	23683.5	24597.9	25381.1	834.12	3273.47	3172.84	1378.83	4143.93	3407.46	4220.48	1890.65	2979.08	833.221	4090.64
0.91_208.0520n	226.083	0.911433	pos	Cysteinyl-Serine	HMDB0028784	Organic acids and derivatives	Carboxylic acids and derivatives	Amino acids, peptides, and analogues	*		44.4	26.1	M+H-H2O, M+NH4	C6H12N2O4S	0.887151	18375	16790.2	15427.6	17376.8	19426.1	338.112	3182.13	4156.42	1566.41	3209.06	17639.3	7387.04	6359.53	3721.84	599.196	4214.82
1.77_488.2364m/z	488.236	1.77188	pos	Ac-Ser-Asp-Lys-Pro-OH	HMDB0062552	Organic acids and derivatives	Carboxylic acids and derivatives	Amino acids, peptides, and analogues			44.4	29.3	M+H	C20H33N5O9	2.60025	24759.8	23493.5	20773.2	24742.1	29204.4	1741.38	17001.6	4639	504.511	8737.05	17345.2	17276.1	7376.97	18279.3	3993.39	13512
10.01_149.0963m/z	149.096	10.014	pos	ANETHOLE	43903	Benzenoids	Phenol ethers	Anisoles	*		44.4	25.4	M+H	C10H12O	1.2223	33599.4	31626.8	30762.9	33033.8	35010.9	32866.8	28953	33010.5	34605.9	28398.3	28889.8	26659	24341.5	35321.2	22296.7	30352.3
10.30_174.1279m/z	174.128	10.2969	pos	Pentedrone	HMDB0256280	Unclassified	Unclassified	Unclassified			44.4	30.2	M+H-H2O	C12H17NO	1.07	4397	4639.38	4563.13	4457.36	4992.78	3695.52	5006.24	4076.14	4306.3	3970.12	6633.25	6173.24	4588.57	5958.7	4806.11	6330.19
10.75_425.3510n	426.358	10.7468	pos	Vaccenyl carnitine	HMDB0006351	Unclassified	Unclassified	Unclassified	*		44.4	28.1	M+H, M+Na	C25H47NO4	1.04445	30028.2	26954.1	26742.1	24529	28539.1	561450	73515.2	65035.1	243554	68714.6	448753	139321	31178.3	71786.9	26353.8	66081.6
9.01_187.1339m/z	187.134	9.00672	neg	10-hydroxy capric acid	35414	Lipids and lipid-like molecules	Fatty Acyls	Fatty Acids and Conjugates			44.4	25.5	M-H	C10H20O3	-0.213794	3874.05	3552.05	3774.13	3591.21	4369.21	2418.93	1755.57	2849.96	2262.51	2615.4	2059.8	1837.02	1744.67	2579.35	2799.37	2444.01
1.19_272.0773n	295.067	1.1916	pos	Pyridine N-oxide glucuronide	HMDB0061177	Organic oxygen compounds	Organooxygen compounds	Carbohydrates and carbohydrate conjugates	*		44.3	26.2	M+H, M+Na	C11H14NO7+	1.14227	388226	354475	276643	353326	386015	108982	352803	399421	225946	431358	311920	271782	293361	293487	233173	334088
1.20_110.0245m/z	110.025	1.19978	neg	Pyrrole-2-carboxylic acid	3787	Organoheterocyclic compounds	Pyrroles	Pyrrole carboxylic acids and derivatives	**	C05942	44.3	27.4	M-H	C5H5NO2	-2.24961	409.479	321.85	467.962	412.626	448.064	113.934	2123.74	485.712	250.902	1344.27	2827.96	2902.86	1016.4	1495.85	1409.48	2445.78
1.38_268.0807n	267.073	1.37747	neg	Arabinosylhypoxanthine	HMDB0003040	Nucleosides, nucleotides, and analogues	Purine nucleosides	Unclassified	*		44.3	22.6	M-H, M+FA-H, 2M-H	C10H12N4O5	-0.234658	881954	924835	921430	925994	943530	211863	478827	164001	230787	368253	1.17972e+06	1.05425e+06	230579	480128	1.27207e+06	1.42533e+06
11.79_299.2591m/z	299.259	11.79	neg	14-methyl-8-hexadecen-1-ol	LMFA05000034	Lipids and lipid-like molecules	Fatty Acyls	Fatty alcohols			44.3	25.5	M+FA-H	C17H34O	-0.461693	14190.6	14877.4	13697.4	14564.1	14542.5	3700.19	3239.59	3500.44	3497.24	5089.87	3502.12	5105.53	3934.58	5066.57	9754.87	5459.11
3.36_221.0931m/z	221.093	3.35872	neg	Phenylalanylglycine	HMDB0028995	Organic acids and derivatives	Carboxylic acids and derivatives	Amino acids, peptides, and analogues	*		44.3	26.3	M-H	C11H14N2O3	-0.288681	871.533	852.405	848.425	889.789	1014.36	124.761	1602.55	20.2609	256.453	126.697	7131.8	5348.79	2362.39	1696.72	3914.95	2739.45
4.57_139.0764m/z	139.076	4.5673	neg	2-n-Propyl-4-oxopentanoic acid	HMDB0060683	Organic acids and derivatives	Keto acids and derivatives	Gamma-keto acids and derivatives	**	C16655	44.3	24	M-H2O-H	C8H14O3	-0.147746	12035.5	12212.4	12268.4	13477.6	13423.2	13923.2	13495.4	13997.6	15817.4	13587.9	14003.2	15015.5	14801.5	14768	14372.3	15046.2
5.62_107.0707m/z	107.071	5.61858	pos	(2R*,3R*)-1,2,3-Butanetriol	90200	Organic oxygen compounds	Organooxygen compounds	Alcohols and polyols			44.3	27.7	M+H	C4H10O3	3.97851	4794.98	4668.85	4221.68	4751.87	4719.27	4793.88	4916.55	4139.84	4780.2	4971.97	4597.91	4277.8	4042.85	5010.63	2121.69	4770.65
7.20_374.2548m/z	374.255	7.19797	neg	Undecanoylcarnitine	LMFA07070110	Lipids and lipid-like molecules	Fatty Acyls	Fatty acid esters	*		44.3	28.1	M+FA-H	C18H35NO4	-0.034972	30375.2	28811.4	29619.4	30287	30741.8	36275.6	29408.7	33984.7	36750.9	31202.4	29702.3	31770.6	32483	34357.4	35131.7	29165.9
1.19_123.0556m/z	123.056	1.1916	pos	Niacinamide	HMDB0001406	Organoheterocyclic compounds	Pyridines and derivatives	Pyridinecarboxylic acids and derivatives	***	C00153	44.2	31	M+H	C6H6N2O	2.51482	835263	896401	799048	796830	993552	138834	371548	194121	183780	284069	556300	473708	213028	412588	266767	604310
1.77_261.1582n	262.165	1.77188	pos	Hydroxyvalerylcarnitine	HMDB0013132	Lipids and lipid-like molecules	Fatty Acyls	Fatty acids and conjugates	*		44.2	26.3	M+H, M+Na	C12H23NO5	2.175	47716	45603.9	41041.2	49452.3	55546.9	86115.5	14124.4	16766.9	39045	10756.6	10388.1	15538.8	10662	19037.1	8547.91	12704
10.42_260.2143n	278.248	10.4193	pos	6-[5]-ladderane-1-hexanol	LMFA05000063	Lipids and lipid-like molecules	Fatty Acyls	Fatty alcohols			44.2	26.1	M+H, M+NH4	C18H28O	1.20365	34719.8	30623.1	30326.2	29524.1	33352.9	31511.4	27865.9	30942.6	31404.1	28631.3	28657.3	28417.1	23310.8	30517.7	19975.1	33558.4
10.61_377.1946m/z	377.195	10.6085	neg	Pentosidine	HMDB0003933	Organic acids and derivatives	Carboxylic acids and derivatives	Amino acids, peptides, and analogues	*		44.2	25.7	M-H	C17H26N6O4	0.817811	21111.5	18877.5	17759.8	19540.7	17883	48.0525	189.875	271.89	64.0821	257.764	123.423	5.88962e-06	255.756	45.2593	5.88962e-06	117.034
10.87_361.2741m/z	361.274	10.8721	pos	O-Arachidonoyl Glycidol	44872	Unclassified	Unclassified	Unclassified			44.2	28.6	M+H	C23H36O3	1.05161	726.289	1008.91	769.666	558.68	808.047	431.54	7079.58	1435.06	383.47	2568.11	14900	16075.1	3472.8	7779.85	4698.05	6451.45
11.63_278.2482m/z	278.248	11.6349	pos	Obscuraminol A	LMSP01080035	Lipids and lipid-like molecules	Sphingolipids	Sphingoid bases			44.2	29.4	M+H	C18H31NO	1.40603	6652.9	6475.01	7052.98	7131.66	6810.26	11831.7	8108.48	12268.7	22635.8	11452.7	11462	13372.9	8252.95	10270.3	6157.88	10323.9
4.30_218.1392m/z	218.139	4.29608	pos	3,6-dioxo-decanoic acid	LMFA01060079	Lipids and lipid-like molecules	Fatty Acyls	Fatty Acids and Conjugates			44.2	28.3	M+NH4	C10H16O4	2.77054	1131.13	981.586	976.527	1382.41	1398.9	1690.23	615.428	150.273	381.75	146.992	470.013	1283.36	49.8283	2026.58	116.516	1436
4.39_218.2120m/z	218.212	4.39165	pos	Dodecanoic acid	HMDB0000638	Lipids and lipid-like molecules	Fatty Acyls	Fatty acids and conjugates	**	C02679	44.2	28.9	M+NH4	C12H24O2	2.96294	38.9605	32.1696	33.7533	35.3046	22.9978	55.0176	63.0895	335.224	95.7377	147.817	53.1061	50.3158	992.797	151.528	2189.47	34.7813
4.41_262.1192m/z	262.119	4.40927	pos	Glycyl-Tryptophan	85761	Organic acids and derivatives	Carboxylic acids and derivatives	Amino acids, peptides, and analogues	*		44.2	26.7	M+H	C13H15N3O3	2.12389	368.51	286.664	201.789	309.526	206.763	100.925	163.025	2019.65	127.708	3004.69	141.811	40.9252	215.959	204.127	199.107	203.194
1.15_230.1140m/z	230.114	1.14785	pos	Threonylglutamine	HMDB0029059	Organic acids and derivatives	Carboxylic acids and derivatives	Amino acids, peptides, and analogues	*		44.1	31.1	M+H-H2O	C9H17N3O5	2.00548	10593.7	10373.8	8322.54	9286.33	10111.7	4723.25	7635.16	945.54	2504.7	3760.17	11648.4	13824.6	4222.16	11861.8	3782.08	11337.3
1.19_405.2097m/z	405.21	1.1916	pos	15beta-Hydroxy-7alpha-mercapto-pregn-4-ene-3,20-dione 7-acetate	70424	Unclassified	Unclassified	Unclassified			44.1	37.9	M+H	C23H32O4S	0.846288	56019.7	48614.6	41938.9	42071.5	62670.1	5.88962e-06	64652.5	18239.5	2030.7	26470.1	31389.8	38986	56085.9	55211.6	104957	62574.4
10.87_545.2762n	546.283	10.8721	pos	Geldanamycin Analog	96314	Unclassified	Unclassified	Unclassified			44.1	33.8	M+H, M+Na	C28H39N3O8	4.5628	1063.19	1259.24	1177.8	1011.8	1559.43	67899.6	8433.05	29989	28350.9	19431.6	3214.99	4932.28	9783.27	7875.07	7554.53	4919.18
10.89_327.0785m/z	327.078	10.8878	pos	Triphenyl phosphate	69897	Unclassified	Unclassified	Unclassified			44.1	26.7	M+H	C18H15O4P	1.184	8658.63	8999.7	7317.45	7768.5	8971.93	9095.14	8250.89	7177.88	10835.1	10806.3	7344.94	7298.85	5989.18	8956.42	5162.09	9279.01
11.17_479.3383n	480.346	11.1717	pos	PC(O-16:1(11Z)/0:0)	LMGP01060028	Lipids and lipid-like molecules	Glycerophospholipids	Glycerophosphocholines			44.1	28.3	M+H, M+Na	C24H50NO6P	1.57817	2076.53	2127.45	3440.33	3510.7	2901.31	16848	36900.4	13045.5	13198.5	11859.2	26598.1	21655	76580.2	27460	20696.7	13083.7
11.29_346.2507n	345.243	11.2892	neg	6-((Z)-pentadec-8-en-1-yl)salicylic acid	LMPK15040003	Lipids and lipid-like molecules	Polyketides	Phenolic lipids			44.1	25.5	M-H2O-H, M-H	C22H34O3	-0.354356	9180.98	10273.4	9654.33	9600.55	9972.01	12092.2	23810.6	15137.4	17599.6	42546.2	2139.49	4241.57	156188	26806.8	13540.5	1142.85
2.32_164.0741m/z	164.074	2.31542	pos	S-Propyl-L-cysteine	89847	Organic acids and derivatives	Carboxylic acids and derivatives	Amino acids, peptides, and analogues			44.1	28.8	M+H	C6H13NO2S	0.986556	2336.06	2524.93	2490.32	2590.24	2620.8	471.603	896.352	564.515	518.05	799.075	2619.33	2341.83	551.611	1276.22	667.666	1526.41
9.45_209.1175m/z	209.117	9.44793	pos	Elemicin	68334	Benzenoids	Phenol ethers	Anisoles		C10451	44.1	26	M+H	C12H16O3	1.30721	577.274	580.126	693.698	791.789	862.009	1562.63	7300.6	4603.04	2435.94	4811.1	1605.3	3136.19	1472.11	3003.41	2437.08	3493.21
0.89_348.0476n	349.055	0.8917	pos	Inosinic acid	HMDB0000175	Nucleosides, nucleotides, and analogues	Purine nucleotides	Purine ribonucleotides	**	C00130	44	24.6	M+H, M+Na, M+K	C10H13N4O8P	1.32736	723403	786547	780246	789916	766055	718044	2406.89	4855.47	838929	19748.6	15277.6	22049.4	3697.51	246991	5.88962e-06	24444.8
11.43_297.2672n	320.256	11.4326	pos	3-ketosphingosine	43208	Lipids and lipid-like molecules	Sphingolipids	Sphingoid bases			44	26.6	M+H, M+Na	C18H35NO2	1.2631	140626	141909	185326	168424	170629	176614	137876	176005	188115	181111	187802	182332	141148	190549	111463	165842
12.10_465.3228n	466.33	12.1038	pos	PE(O-18:1(9Z)/0:0)	LMGP02060004	Lipids and lipid-like molecules	Glycerophospholipids	Glycerophosphoethanolamines			44	34.4	M+H, M+Na	C23H48NO6P	1.85561	42068.6	42143	43483.6	49829.2	47830.3	96522	153463	89084.7	64188.1	79075.6	125039	121421	136897	91391.7	64041.1	46404.1
13.50_328.3213m/z	328.321	13.4951	pos	Stearoylethanolamide	3720	Organic nitrogen compounds	Organonitrogen compounds	Amines	*		44	25.9	M+H	C20H41NO2	0.917135	6144.34	7286.72	6955.86	7171.03	6121.64	1318.64	1626.08	955.715	889.246	3312.53	1451.95	2497.33	2158.71	1098.13	1385.71	1728.93
0.81_365.1058m/z	365.106	0.809917	pos	Sucrose	137	Organic oxygen compounds	Organooxygen compounds	Carbohydrates and carbohydrate conjugates	**	C00089	43.9	23.6	M+Na	C12H22O11	1.21991	16734.2	20196.3	17609.7	16170.6	17707.1	49964.8	180147	290330	63743.3	126909	65516.8	62035.8	67635.6	49935.3	105569	107042
1.31_260.0233m/z	260.023	1.311	neg	O-Sulfotyrosine	HMDB0155722	Organic acids and derivatives	Carboxylic acids and derivatives	Amino acids, peptides, and analogues			43.9	27.7	M-H	C9H11NO6S	-0.417965	1105.86	1295.76	1430.28	1347.4	1202.16	893.885	3114.49	1551.68	663.573	2287.91	3669.46	3963.46	1982.52	2347.75	3208.15	2642.78
1.38_379.0872m/z	379.087	1.37747	neg	Kaltostat	HMDB0253761	Organic oxygen compounds	Organooxygen compounds	Carbohydrates and carbohydrate conjugates	**	C01768	43.9	30.4	M-H2O-H	C14H22O13	-2.50845	9026.25	10061	8804.47	10021	9514.06	1331.2	3837.22	708.897	1284.69	2033.34	10144.3	8000.61	1043.49	3556.2	5272.27	8421.6
10.77_251.2008m/z	251.201	10.7688	pos	5E,8E,11E-hexadecatrienoic acid	34810	Lipids and lipid-like molecules	Fatty Acyls	Fatty Acids and Conjugates			43.9	24	M+H	C16H26O2	0.92771	6076.01	5168.8	5439.43	4937.06	5343.94	1727.41	1173.47	1184.86	1327.02	1013.65	1145.27	1166.99	858.323	1285.61	818.155	1425.16
9.98_198.1855m/z	198.186	9.9781	pos	cis-Quinceoxepane	HMDB0038108	Organoheterocyclic compounds	Oxepanes	Unclassified			43.9	28.4	M+NH4	C12H20O	1.49854	1290.31	1199.36	1079.84	1409.29	1213.89	1389.42	1996.61	1774.12	2339.93	2520.26	3010.56	1823.31	1296.12	1406.83	958.564	2444.94
10.09_287.2464n	310.238	10.0871	pos	Prosopinine	LMSP01080049	Lipids and lipid-like molecules	Sphingolipids	Sphingoid bases			43.8	24.7	M+H, M+Na	C16H33NO3	1.18269	9893.56	9812.86	10079.2	10502.6	10191	10877.5	9075.8	13452.9	11547.6	9899.01	9725.3	11254.5	10141.8	13500.1	39238	12115.5
10.51_357.2792m/z	357.279	10.5101	pos	(1S)-1-hydroxy-23,24-didehydro-25,26,27-trinorcalciol	57900	Lipids and lipid-like molecules	Sterol Lipids	Secosteroids			43.8	25.6	M+H	C24H36O2	1.04086	10256.7	8473.98	7337.93	7756.83	10068.7	1774.92	2077.3	1807.91	452.528	4657.9	184.321	3077.74	578.127	914.601	1467.2	2389.07
10.57_298.2512n	299.258	10.5659	pos	9-hydroxy-12Z-octadecenoic acid	35484	Unclassified	Unclassified	Unclassified			43.8	27.4	M+H-H2O, M+H	C18H34O3	1.25564	3472.15	3723.77	2961.37	3415.35	3073.63	2553.13	2888.84	2698.31	2917.61	3016.86	2582.87	2214.72	1857.68	3555.9	5859.51	2519.68
11.29_413.2310m/z	413.231	11.2892	neg	Perindopril	HMDB0014928	Organic acids and derivatives	Carboxylic acids and derivatives	Amino acids, peptides, and analogues		C07706	43.8	28.1	M+FA-H	C19H32N2O5	4.56918	931.807	961.859	1081.88	1252.62	1054.97	1782.83	4369.57	2701.8	2819.89	7609.04	50.7381	475.23	29759.7	4310.1	2077.44	5.88962e-06
12.51_308.2354n	331.225	12.5127	pos	methyl 12,13-epoxy-9,15-octadecadienoate	74810	Lipids and lipid-like molecules	Fatty Acyls	Fatty Acids and Conjugates			43.8	22.6	M+H, M+Na	C19H32O3	0.805254	53762.8	52110.5	65036	52399.9	55763	2319.53	990.474	1226.31	2700.52	1649.23	2908.13	1572.95	1210.04	1794.91	629.342	1120.5
3.96_420.1442m/z	420.144	3.96323	pos	8-p-Coumaroyl-3,4-dihydro-5,7-dihydroxy-4-phenylcoumarin	LMPK12120258	Unclassified	Unclassified	Unclassified			43.8	31	M+NH4	C24H18O6	0.100918	583.26	773.153	808.798	679.257	492.317	817.719	5.88962e-06	5.88962e-06	19386.6	397.746	5.88962e-06	5.88962e-06	61.8515	5868.87	5.88962e-06	5.88962e-06
4.67_252.1236m/z	252.124	4.67062	pos	Methyl (2R*,3S*)-2,3-dihydro-3-hydroxy-2-isopropenyl-5-benzofurancarboxylate	HMDB0033109	Organoheterocyclic compounds	Coumarans	Unclassified			43.8	24.9	M+NH4	C13H14O4	2.24792	2434.05	2215.67	2379.9	2225.94	2179.07	3802.86	1194.55	51.2643	1514.34	146.87	631.811	1928.65	238.627	4078.64	5.88962e-06	2043.57
10.27_135.0806m/z	135.081	10.2743	pos	2,5-Dimethylbenzaldehyde	265044	Benzenoids	Benzene and substituted derivatives	Benzoyl derivatives	*		43.7	23.6	M+H	C9H10O	0.964633	3269.88	3176.74	3998.08	3509.76	3676.49	2497.72	2213.9	2261.97	2930.31	2321.75	2109.57	1766.01	1667.19	2880.31	1775.95	4089.93
10.67_452.2784m/z	452.278	10.6748	neg	PE(0:0/16:0)	LMGP02050036	Lipids and lipid-like molecules	Glycerophospholipids	Glycerophosphoethanolamines	*		43.7	21.7	M-H	C21H44NO7P	0.298145	17188.1	17629.9	16469.4	15896.8	13458.2	21887.6	17528.1	18050	14290.6	22567.9	21455.1	14317.1	19617	13431.2	17121.3	15251.8
10.75_179.1433m/z	179.143	10.7468	pos	Geijerone	92930	Lipids and lipid-like molecules	Prenol lipids	Monoterpenoids	*		43.7	23.1	M+H	C12H18O	1.20066	17967.7	17103.7	16306.9	15839.8	16734.5	14367.2	11666.9	12739.5	14635.7	11013.1	12232.1	11157.4	9640.01	12589	8001.38	12866.5
11.33_297.2434m/z	297.243	11.3293	neg	5-Hexyltetrahydro-2-furanoctanoic acid	HMDB0031127	Lipids and lipid-like molecules	Fatty Acyls	Eicosanoids	*		43.7	22.3	M-H	C18H34O3	-0.512138	56786.6	62824.9	59618.2	69679	58006.6	11296.2	6616.27	8960.54	15102.7	10737.7	9906.78	8054.05	9018.28	12614.8	17919.7	10862.9
11.39_194.1673n	177.164	11.3931	pos	6,10-Dimethyl-5(E),9-undecadien-2-one	98068	Lipids and lipid-like molecules	Fatty Acyls	Hydrocarbons			43.7	23.6	M+H-H2O, M+H	C13H22O	1.06399	7911.48	7626.96	9023.43	7873.22	7207.66	9943.09	8557.84	9952.56	12591.9	8663.59	9320.81	8621.33	6674.29	9536.23	5070.16	9258.79
7.94_151.0755m/z	151.076	7.93522	pos	4-Ethoxybenzaldehyde	89646	Benzenoids	Phenol ethers	Unclassified			43.7	20.8	M+H	C9H10O2	1.08696	17827.7	17855	17020.4	19573.2	20539	17483.8	15800.1	17140.7	17694.2	16854.9	17755.4	16952.2	15082	19170.1	13057.9	18907.2
9.34_257.1994n	280.189	9.34062	pos	N-lauroyl glycine	LMFA08020261	Lipids and lipid-like molecules	Fatty Acyls	Fatty amides			43.7	23.5	M+H, M+Na	C14H27NO3	1.17516	23974.7	24059.7	24256.1	27236.4	28351	23756.6	18231.4	19869.6	26506.4	16902.3	23373.6	23127.8	18515.9	25150.7	20034.6	23952.8
9.38_378.2407m/z	378.241	9.37742	pos	PC(O-10:1(9E)/0:0)	LMGP01060027	Lipids and lipid-like molecules	Glycerophospholipids	Glycerophosphocholines			43.7	29.2	M+H-H2O	C18H38NO6P	0.854935	203.522	206.956	173.503	298.419	205.024	16359	560.601	1261.3	3298.44	42.2976	208.153	136.877	816.088	224.54	148.836	173.958
9.45_381.2648m/z	381.265	9.45323	neg	1a,1b-dihomo-PGF2alpha	LMFA03010157	Lipids and lipid-like molecules	Fatty Acyls	Eicosanoids			43.7	25.1	M-H	C22H38O5	0.352395	1603.51	1560.69	1656.03	1720.8	1625.21	581.47	251.946	342.764	129.418	6698.84	592.08	527.966	30572.8	3151.53	1581.19	255.9
1.18_346.0557m/z	346.056	1.1804	neg	N-Acetyl-D-galactosamine 1-phosphate	HMDB0006480	Organic oxygen compounds	Organooxygen compounds	Carbohydrates and carbohydrate conjugates	*		43.6	29.7	M+FA-H	C8H16NO9P	4.077	25537.9	25487.7	31733.9	36353.4	30065.1	4617.62	17078.4	9668.56	6626.07	14580.5	21893.9	27305.7	25764.9	55052.7	27225.4	44489.3
12.37_456.8391m/z	456.839	12.3709	pos	3-(3,5-Diiodo-4-hydroxyphenyl)lactate	HMDB0059636	Phenylpropanoids and polyketides	Phenylpropanoic acids	Unclassified		C04367	43.6	26	M+Na	C9H8I2O4	-3.05558	170161	174186	155031	124128	106985	236705	181197	214093	243056	208724	181322	141728	111555	141716	106029	152339
4.75_124.1124m/z	124.112	4.7531	pos	2-(1-Propenyl)-delta1-piperideine	89209	Organoheterocyclic compounds	Pyridines and derivatives	Hydropyridines			43.6	23	M+H	C8H13N	2.81688	4191.55	5211.22	5491.17	4678.95	6224.26	4668.71	4007.63	4708.33	4938.41	4562.51	4058.33	4919.07	2978.52	5390.97	2454.47	5089.36
5.29_180.0659m/z	180.066	5.29378	pos	Methyl n-formylanthranilate	HMDB0032398	Benzenoids	Benzene and substituted derivatives	Benzoic acids and derivatives	*		43.6	27.4	M+H	C9H9NO3	1.92319	282.827	239.783	216.545	225.628	292.793	1161.55	405.338	1049.57	1672.03	676.189	406.924	487.957	684.774	893.112	128.857	437.277
8.43_175.1483m/z	175.148	8.42528	pos	1,2,3,4-tetrahydro-2,5,8-trimethyl naphthalene	96269	Unclassified	Unclassified	Unclassified			43.6	21.4	M+H	C13H18	1.05477	11308.3	10677.6	11346.9	11433.2	11724.8	10329	8716.14	10010.7	10886.3	11260.1	10028.3	9917.79	9362.55	15463	8771.86	11843
0.85_204.0981m/z	204.098	0.84955	pos	Asparaginylalanine	HMDB0028724	Organic acids and derivatives	Carboxylic acids and derivatives	Amino acids, peptides, and analogues	*		43.5	24.4	M+H	C7H13N3O4	0.930259	3794.27	4104.44	4180.33	3955.4	4023.96	11545.2	295.236	2075.36	4531.87	2718.7	90.6085	74.1348	329.044	462.266	135.148	277.138
0.85_324.0362n	325.043	0.84955	pos	Pseudouridine 5'-phosphate	HMDB0001271	Organic oxygen compounds	Organooxygen compounds	Carbohydrates and carbohydrate conjugates	**	C01168	43.5	25	M+H, M+Na, M+K	C9H13N2O9P	0.911793	121902	125828	126065	133024	115390	7491.91	2265.17	2832.35	14735.2	6641.47	2697.88	2558.28	1954.91	8732.64	473.156	2094.5
1.49_288.2035m/z	288.204	1.49398	pos	Leucyl-Arginine	85827	Organic acids and derivatives	Carboxylic acids and derivatives	Amino acids, peptides, and analogues	*		43.5	26	M+H	C12H25N5O3	1.79869	262.072	316.92	293.436	364.061	310.861	310.836	709.961	204.146	343.541	432.253	912.15	668.52	1451.1	666.742	2524.31	708.781
10.66_241.1809m/z	241.181	10.6596	neg	2-Methylcyclododecanone	HMDB0041404	Organic oxygen compounds	Organooxygen compounds	Carbonyl compounds			43.5	20.6	M+FA-H	C13H24O	0.0485857	8569.94	9495.68	9773.3	9540.77	8610.77	585.033	1620.26	1793.29	831.654	1740.6	2912.17	4126.89	531.402	2252.72	2833.96	3364.92
10.77_167.1432m/z	167.143	10.7688	pos	6Z-undecenoic acid	LMFA01030219	Lipids and lipid-like molecules	Fatty Acyls	Fatty Acids and Conjugates			43.5	22.6	M+H-H2O	C11H20O2	1.03304	2704.44	1788.52	1739.15	1889.23	1889.57	650.601	492.06	631.771	561.871	466.458	518.872	397.726	410.314	504.908	310.769	549.002
10.91_358.3683m/z	358.368	10.9057	pos	Behenic acid	HMDB0000944	Lipids and lipid-like molecules	Fatty Acyls	Fatty acids and conjugates	**	C08281	43.5	22.4	M+NH4	C22H44O2	0.936862	14893.2	16720	12709.4	13854.8	15099.2	61891.2	25932.6	27109	41859.1	25637.4	15988.3	18659.3	15562.3	18930.7	23969.7	44168.9
5.04_126.1049n	109.102	5.04318	pos	4-Methyl-6-hepten-3-one	98134	Lipids and lipid-like molecules	Fatty Acyls	Oxygenated hydrocarbons			43.5	22.8	M+H-H2O, M+H	C8H14O	3.41922	22996	21804.1	22025.3	25189.4	25888.9	22433.8	17524.2	20949.4	23238.3	21105	19711	19756.1	15996.3	22163.5	13263	24460.3
6.85_116.0531m/z	116.053	6.84987	pos	1-Isothiocyanatobutane	HMDB0031328	Organosulfur compounds	Isothiocyanates	Unclassified	*		43.5	28.5	M+H	C5H9NS	1.79695	214.624	193.049	206.191	199.094	218.343	165.867	159.75	178.962	195.204	221.392	175.794	173.165	255.266	362.648	3693.36	213.332
0.73_112.9856m/z	112.986	0.726883	neg	Trifluoroacetic acid	HMDB0014118	Organic acids and derivatives	Carboxylic acids and derivatives	Alpha-halocarboxylic acids and derivatives	*		43.4	18.4	M-H	C2HF3O2	0.0738302	78750.8	86414.6	102194	90326.6	89030.3	116625	115753	153977	151364	127268	108885	122848	122985	137617	167873	136594
0.83_152.0022m/z	152.002	0.82665	neg	3-Sulfinoalanine	5927	Organic acids and derivatives	Carboxylic acids and derivatives	Amino acids, peptides, and analogues	**	C00606	43.4	25.9	M-H	C3H7NO4S	-0.490666	4076.01	3881.41	4498.46	4641.45	4012.56	463.952	6942.72	2000.85	1151.28	5812.96	10838.7	13616.3	2183.71	4057.65	824.405	3613.78
1.58_129.0662m/z	129.066	1.58095	pos	Squamolone	86560	Organoheterocyclic compounds	Pyrrolidines	Pyrrolidine carboxylic acids and derivatives	*		43.4	26.8	M+H	C5H8N2O2	3.07511	884.351	890.949	907.872	1035.84	1200.95	956.181	1107.84	793.477	823.054	1100.17	1284.19	957.457	444.578	1236.68	340.699	2340.85
11.55_149.0235m/z	149.023	11.5465	pos	Benzoquinoneacetic acid	HMDB0002334	Organic oxygen compounds	Organooxygen compounds	Carbonyl compounds	*		43.4	21.7	M+H-H2O	C8H6O4	1.04607	153717	151998	157412	162385	161390	206029	155541	190640	200297	181472	169925	170512	142840	184151	110469	169999
2.51_118.0655m/z	118.066	2.50945	pos	Phenylacetonitrile	63616	Benzenoids	Benzene and substituted derivatives	Benzyl cyanides	**	C16074	43.4	23.3	M+H	C8H7N	3.38822	10490.9	10741.2	10995.7	11272.8	11478.6	4636.13	10588.9	5670.22	5028.56	8286.1	11333.6	10837.8	11667.2	9566.38	6652.83	7865.45
3.18_217.1051m/z	217.105	3.17867	pos	Tetraethylene glycol	HMDB0094708	Organic oxygen compounds	Organooxygen compounds	Ethers			43.4	22.1	M+Na	C8H18O5	2.37473	30962.2	32691.3	29680.5	34227.9	34742.5	52717.6	61051.5	76651.1	69986.3	93443.7	73854.6	55010.4	62750.4	43292.9	75611.7	92552.4
3.99_465.1061m/z	465.106	3.98995	neg	3,4,5,2',4',6'-Hexahydroxychalcone 2'-glucoside	LMPK12120279	Unclassified	Unclassified	Unclassified			43.4	31.2	M-H	C21H22O12	4.91644	1241.92	935.491	1081.89	1249.31	921.839	24851.6	5102.87	903.845	30943.4	882.714	5412.24	7037.92	1427.26	10739.6	50.6052	5731.75
4.80_549.1698m/z	549.17	4.8049	neg	Raffinose	HMDB0003213	Organic oxygen compounds	Organooxygen compounds	Carbohydrates and carbohydrate conjugates	**	C00492	43.4	29.7	M+FA-H	C18H32O16	4.99648	129067	122016	144058	128563	177648	1031.92	322.58	488.983	1226.34	502.465	85.9297	328.993	134.745	1462.41	5.88962e-06	720.003
1.36_281.0271m/z	281.027	1.35522	neg	Isosorbide Dinitrate	HMDB0015021	Organoheterocyclic compounds	Furofurans	Isosorbides		C07456	43.3	26.8	M+FA-H	C6H8N2O8	3.48135	24916.2	25589.1	24765.1	25708.3	25953.9	5.88962e-06	14703.4	1302.79	35.8588	1020.12	15175	7035.34	4733.63	6350.47	2556.52	14103.1
1.54_446.1953n	491.194	1.54307	neg	Estrone 3-glucuronide	LMST05010011	Lipids and lipid-like molecules	Steroids and steroid derivatives	Steroidal glycosides	**	C11133	43.3	24.8	M-H, M+FA-H	C24H30O8	2.77659	23421.2	19502.8	21778.9	16478.8	21381	1911.97	32924	4353.9	1948.37	12626.1	19793	26590.8	24264.2	32976.1	37340.5	11030.6
10.53_315.2540m/z	315.254	10.5273	neg	Margaric acid	LMFA01010017	Lipids and lipid-like molecules	Fatty Acyls	Fatty acids and conjugates	*		43.3	20.5	M+FA-H	C17H34O2	-0.46998	9048.5	9636.86	8366.81	9200.38	8666.05	7930.98	7739.15	7610.58	9661.45	10108.9	6424.94	8989.19	6940.15	10114.2	51133.1	9896.11
4.29_128.0176m/z	128.018	4.28655	neg	2-Acetyl-4,5-dihydrothiazole	HMDB0033561	Organoheterocyclic compounds	Azolines	Thiazolines			43.3	27	M-H	C5H7NOS	-0.0458702	6824.11	6969.61	6560.24	7091.5	7533.97	2349.34	16642.3	10299.8	3778.4	11179.7	7041.75	7298.36	19525.2	6688.87	8462.98	7059.66
5.15_192.1022m/z	192.102	5.14927	pos	(E)-5-(3,4,5,6-Tetrahydro-3-pyridylidenemethyl)-2-furanmethanol	HMDB0033560	Organoheterocyclic compounds	Pyridines and derivatives	Hydropyridines			43.3	22.5	M+H	C11H13NO2	1.3087	1863.29	1975.31	1788.17	1865.54	2132.05	83.1794	958.605	103.269	125.951	300.173	1518.85	885.566	435.034	619.983	213.068	677.844
5.68_462.1909m/z	462.191	5.68388	pos	N-Oleoyl Glycine	HMDB0241916	Lipids and lipid-like molecules	Fatty Acyls	Fatty amides			43.3	24.1	M+NH4	C20H21FN6O5	2.9965	48022.4	46187.9	50140.6	48729.1	45290.6	5.88962e-06	5.88962e-06	16.8892	5.88962e-06	58.7668	514.094	5.88962e-06	5.88962e-06	5.88962e-06	5.88962e-06	5.88962e-06
8.43_268.1885m/z	268.189	8.42528	pos	Metoprolol	1250	Benzenoids	Phenols	Tyrosols and derivatives		C07202	43.3	29.9	M+H	C15H25NO3	-8.22064	47908.9	44047.3	45807.1	47313.5	47707.8	42402.3	37524.7	40844.8	44670.5	46514.2	41413	41308.4	38625.8	66396	37772.3	49758.6
9.41_478.1981m/z	478.198	9.41052	pos	3,5-Pyridinedicarboxylic acid, 2,6-dimethyl-4-(3-nitrophenyl)-, methyl 2-[methyl(phenylmethyl)amino]	1506	Unclassified	Unclassified	Unclassified			43.3	24	M+H	C26H27N3O6	1.77194	881.027	783.638	1038.12	1078.53	896.681	2896.97	21586.2	9100.12	6139.08	17722.6	9458.14	6494.92	7522.78	3892.79	2484.7	5534.08
0.79_139.9874n	184.986	0.78745	neg	Acetylphosphate	HMDB0001494	Organic acids and derivatives	Organic phosphoric acids and derivatives	Phosphate esters	**	C00227	43.2	18.2	M-H, M+FA-H	C2H5O5P	-0.681961	8825.37	9901.95	10577	11375.9	11249.3	34692.9	227683	38230.6	16962.2	79461	104904	165569	85557.7	69500.9	50998.4	92690.2
0.85_125.0178m/z	125.018	0.847483	neg	Pyrazinemethanethiol	HMDB0036186	Organoheterocyclic compounds	Diazines	Pyrazines			43.2	27.1	M-H	C5H6N2S	-0.385968	1900.48	1974.63	1919.55	2099.19	1883.31	10024.1	2574.11	10434.5	17698.2	1177.95	1114.57	847.566	4676.18	2941.89	900.882	794.687
10.79_280.2042n	263.201	10.7913	pos	12S-HHTrE	LMFA03050002	Lipids and lipid-like molecules	Fatty Acyls	Eicosanoids			43.2	21.8	M+H-H2O, M+Na, M+H	C17H28O3	1.23654	3696.73	2726.48	2300.38	2263.89	2769.32	2001.3	2232.08	1872.2	4233.01	4300.86	11168.6	11783.4	16848.6	7248.17	6855.17	2494.55
3.85_134.0472m/z	134.047	3.8459	neg	FAPy-adenine	HMDB0004816	Organoheterocyclic compounds	Diazines	Pyrimidines and pyrimidine derivatives	*	C06502	43.2	23.2	M-H2O-H	C5H7N5O	-0.0822623	2450.54	2387.76	2573.83	2710.92	2630.12	1368.85	1294.46	1017.42	1446.87	1289.98	1210.37	1232.8	1168.44	1083	1065.58	959.107
4.21_129.1026m/z	129.103	4.2102	pos	(S)-Piperidine-2-carboxamide	73373	Unclassified	Unclassified	Unclassified			43.2	23.5	M+H	C6H12N2O	2.8022	1950.94	1852.62	1891.3	1930.25	2077.09	2246.89	1258.53	1807.13	2067.81	1530.67	1610.63	1439.97	938.693	1655.6	974.005	1621.54
4.54_445.2436m/z	445.244	4.54318	pos	Neryl rhamnosyl-glucoside	HMDB0029349	Lipids and lipid-like molecules	Prenol lipids	Terpene glycosides	*		43.2	27.4	M+H-H2O	C22H38O10	0.93313	2166.17	1566.16	2268.73	1613.65	1751.94	188.216	13604.8	17383.6	2848.84	1134.39	270.902	207.119	55654.1	2209.08	1496.18	149.947
9.38_361.1633m/z	361.163	9.38468	neg	Thyrotropin-releasing factor	HMDB0259062	Organic acids and derivatives	Carboxylic acids and derivatives	Amino acids, peptides, and analogues		C03958	43.2	20.6	M-H	C16H22N6O4	0.929352	39693	39033.8	36036.6	41809.9	42691.1	41163.2	29814.4	38118.7	47227.5	40879.2	32399.1	37770	34133	42213.1	41064.1	32638.6
0.91_203.1395m/z	203.139	0.911433	pos	N-pentanoyl-homoserine lactone	LMFA08030030	Lipids and lipid-like molecules	Fatty Acyls	Fatty amides			43.1	22.8	M+NH4	C9H15NO3	2.41727	650.939	1030.02	817.522	1246.22	942.745	42824.2	16200.6	13937.9	40010.8	14700.9	6835.94	3800.72	20958.1	15110.3	4441.44	3742.92
1.76_258.0852n	257.078	1.75767	neg	2'-O-Methyluridine	HMDB0240328	Nucleosides, nucleotides, and analogues	Pyrimidine nucleosides	Unclassified			43.1	18.9	M-H, M+FA-H	C10H14N2O6	0.0340318	18668.2	20548.1	21906	23146.2	22608.2	913.454	5171.27	1014.84	1278.46	4243.43	4499.44	8337.89	2771.31	3816.96	2922.79	10948
11.06_204.1386m/z	204.139	11.062	pos	(all-E)-3,5,7-Tridecatriene-9,11-diyn-1-ol	HMDB0038526	Lipids and lipid-like molecules	Fatty Acyls	Fatty alcohols	*		43.1	19.8	M+NH4	C13H14O	1.61273	54380.9	54050.8	54636.6	55648.8	53990.1	66031.5	50675.4	59913.2	64723.9	55782	55445.4	55882.9	44313.9	62170.9	40539.4	69381.5
12.04_343.2225m/z	343.222	12.0431	pos	(±)5(6)-EET	3851	Unclassified	Unclassified	Unclassified			43.1	25.2	M+Na	C20H32O3	-5.94614	3692.88	3441.02	3186.22	3319.49	3444.75	2042.07	1461.63	1986.49	2327.76	5059.63	1945.61	3754.32	1314.54	1973.34	19715.5	927.288
4.75_124.0892n	142.123	4.7531	pos	2E,6E-Octadienal	46424	Lipids and lipid-like molecules	Fatty Acyls	Fatty aldehydes			43.1	20.6	M+H, M+NH4, M+H-H2O	C8H12O	2.78758	15748.1	18663.7	19520.1	17024.9	22156.1	17112	14489.7	17260.7	17636.4	16360.6	15066.3	18034.7	10498.9	19304.5	8992.41	18477.2
4.97_286.0845m/z	286.084	4.96908	pos	Dehydroanonaine	HMDB0030350	Alkaloids and derivatives	Aporphines	Unclassified	*		43.1	25.3	M+Na	C17H13NO2	2.34809	3531	3809.03	5457.38	3479.45	3343.53	9198.48	2056.35	495.568	3169.25	830.981	784.105	2443.63	327.006	6048.75	106.78	5307.33
5.38_317.1933m/z	317.193	5.38145	pos	Thiazinamium	HMDB0240235	Organoheterocyclic compounds	Benzothiazines	Phenothiazines			43.1	31.3	M+NH4	C18H23N2S+	4.21753	3081.74	3176.11	2403.43	2934	3022.85	4391.59	8834.25	14061.5	6409.54	13821.5	11621.9	7111.01	10830.2	9574.16	3477.46	14964.7
1.33_205.0354m/z	205.035	1.33367	neg	3-Oxoadipic acid	HMDB0000398	Organic acids and derivatives	Keto acids and derivatives	Medium-chain keto acids and derivatives	**	C00846	43	17	M+FA-H	C6H8O5	0.00392369	2491.15	2234.58	3098.34	3066.26	3160.25	671.662	1098.87	628.554	661.933	454.762	3045.29	1845.96	506.148	862.518	619.982	2332.08
1.71_153.0410m/z	153.041	1.7073	pos	6,8-Dihydroxypurine	58027	Organoheterocyclic compounds	Imidazopyrimidines	Purines and purine derivatives	*		43	23.6	M+H	C5H4N4O2	2.00401	10311.6	10250.9	10056.8	11356.2	12346	420.525	8067.89	2397.59	1284.78	5851.35	9842.51	4209.82	2861.32	10198.7	2838.14	6478.66
1.71_401.2152m/z	401.215	1.7073	pos	Dihydrozeatin O-beta-D-Glucoside	HMDB0302649	Lipids and lipid-like molecules	Fatty Acyls	Fatty acyl glycosides	*		43	23.1	M+NH4	C16H25N5O6	2.33285	7353.53	7617.84	7076.71	7841.42	7977.42	5.88962e-06	11286.1	1672.26	130.989	2728.04	12647.9	11250.3	10435.9	7235	7994.82	5494.89
10.36_315.2540m/z	315.254	10.3584	neg	(S)-14-Methylhexadecanoic acid	HMDB0031067	Lipids and lipid-like molecules	Fatty Acyls	Fatty acids and conjugates	*		43	17.6	M+FA-H	C17H34O2	-0.431389	8434.32	7867.2	7252.39	7399.85	8154.16	5293.78	5960.19	4648.7	5578.81	5877.47	4944.46	5400.35	4381.04	6251.75	16081.7	7430.38
3.43_178.0636n	196.097	3.43167	pos	Coniferaldehyde	HMDB0141782	Benzenoids	Phenols	Methoxyphenols	**	C02666	43	23.4	M+H, M+NH4	C10H10O3	3.16715	6472.11	5984.76	6239.62	6480.23	6850.95	1718.36	2843.24	1329.6	1619.05	1684.64	4696.22	5096.06	1998.4	2699.22	1864.88	2322.06
3.79_149.0276m/z	149.028	3.7877	neg	2-Hydroxy-4-(methylthio)butanoic acid	LMFA01050480	Lipids and lipid-like molecules	Fatty Acyls	Fatty acids and conjugates	*		43	17.8	M-H	C5H10O3S	-1.10116	6706.28	5705.27	7883.26	6966.14	6449.53	100.017	106.484	60.655	38.8091	64.7493	150.615	49.9423	107.115	168.813	195.004	153.231
5.04_193.0500m/z	193.05	5.04318	pos	1,3,6,8-Naphthalenetetrol	66101	Unclassified	Unclassified	Unclassified			43	23	M+H	C10H8O4	2.34408	2313.94	2269.52	1759.06	2395.41	2413.97	2122.7	1580.82	1641.02	1943.27	1756.49	1735.96	1990.78	1056.55	1939.9	1184.37	1828.51
5.93_134.0611m/z	134.061	5.92622	neg	5-(2-Furanyl)-3,4-dihydro-2H-pyrrole	HMDB0040013	Organoheterocyclic compounds	Heteroaromatic compounds	Unclassified			43	17.2	M-H	C8H9NO	-0.404536	66.6509	72.0039	80.9361	61.4044	66.2205	6874.47	1624.82	4387.89	8373.53	2931.75	783.286	1138.15	2925.66	4183.05	1318.94	632.012
0.68_259.1412m/z	259.141	0.676333	neg	D-1-Amino-2-pyrrolidinecarboxylic acid	HMDB0030405	Organic acids and derivatives	Carboxylic acids and derivatives	Amino acids, peptides, and analogues	*		42.9	17.1	2M-H	C5H10N2O2	-0.0580845	135.661	163.823	170.22	109.783	193.455	21.4276	825.26	325.032	132.086	217.393	639.444	1013.34	3747.47	533.656	5664.48	1024.71
0.79_218.0669m/z	218.067	0.78745	neg	Fructoseglycine	HMDB0060278	Organic acids and derivatives	Carboxylic acids and derivatives	Amino acids, peptides, and analogues			42.9	31.3	M-H2O-H	C8H15NO7	-0.518502	2622.21	2820.72	3611.52	3198.97	3129.75	1662.23	3475.39	972.452	1356.26	2383.21	3627.15	5294.87	2802.97	3757.29	790.384	2183.7
0.81_295.0840m/z	295.084	0.805983	neg	4-Carboxynevirapine	HMDB0060759	Lipids and lipid-like molecules	Steroids and steroid derivatives	Estrane steroids	*		42.9	18.8	M-H	C15H12N4O3	1.18776	13993.3	13041.2	13398.5	15726.1	17615.3	312.715	4443.25	842.567	462.087	3438.72	6086.1	6751.64	2209.68	4806.1	1921.99	4128.59
1.10_191.0489m/z	191.049	1.10293	pos	Lanthionine	HMDB0240656	Organic acids and derivatives	Carboxylic acids and derivatives	Amino acids, peptides, and analogues			42.9	25.4	M+H-H2O	C6H12N2O4S	2.02672	144.695	142.88	121.705	171.398	174.894	86.5292	1300.28	1078.39	233.861	1009.77	7992.07	3253.29	1664.7	1210.89	678.707	1739.04
1.47_190.0721m/z	190.072	1.46732	neg	L-trans-5-Hydroxy-2-piperidinecarboxylic acid	HMDB0029426	Organic acids and derivatives	Carboxylic acids and derivatives	Amino acids, peptides, and analogues	*		42.9	16	M+FA-H	C6H11NO3	0.300181	2062.2	2087.85	2160.43	2160.78	2266.19	56.9956	1304.45	175.842	121.924	654.067	1678.17	1845.99	506.692	922.077	348.127	422.098
10.53_164.0475n	147.044	10.5304	pos	m-Coumaric acid	305	Phenylpropanoids and polyketides	Cinnamic acids and derivatives	Hydroxycinnamic acids and derivatives	**	C12621	42.9	18.2	M+H-H2O, M+H	C9H8O3	0.744282	6654.02	7402.33	5603.58	7004.79	6658.45	8376.61	5992.03	6391.51	7554.84	6043.18	5475.58	4893.2	4947.97	7218.56	3506.92	5681.94
11.43_507.3697n	508.377	11.4326	pos	PC(O-18:1(11Z)/0:0)	LMGP01060034	Lipids and lipid-like molecules	Glycerophospholipids	Glycerophosphocholines			42.9	20.8	M+H, M+Na	C26H54NO6P	1.67686	83563.6	89792.5	133026	95436.4	109494	27477.2	22170.8	17221.1	10016	17098.6	25517.5	28453.9	15424.2	14304.5	32394.9	12446.4
13.05_379.1580m/z	379.158	13.0467	neg	Ecabet	HMDB0015613	Lipids and lipid-like molecules	Prenol lipids	Diterpenoids			42.9	22.9	M-H	C20H28O5S	-1.25843	9198.84	9824.22	12097.3	10853.5	10796.2	52465.3	111123	96371.1	23369	107994	198240	108363	88069.5	84424.9	77035.3	43306.8
13.73_371.1015m/z	371.102	13.7268	pos	Zopiclone	HMDB0015329	Organoheterocyclic compounds	Pyrrolopyrazines	Cyclopyrrolones			42.9	33.9	M+H-H2O	C17H17ClN6O3	-0.668451	10558.3	8169.44	9399.28	11813.2	7518.39	9892.52	12254.4	10034.8	7503.31	6635.7	6753.94	8858.74	7226.19	7209.89	5495.81	13945.4
4.01_208.1316n	231.121	4.00757	pos	5S,6S-epoxy-15R-hydroxy-ETE	HMDB0062236	Organic oxygen compounds	Organooxygen compounds	Ethers			42.9	18.9	M+H, M+NH4, M+Na	C9H20O5	2.29242	163.484	225.06	103.104	233.548	168.945	41836.6	88889.1	94209.8	67624.6	98705.6	77141.2	68593	58968.1	38989.5	18399	80759.3
4.08_231.1706m/z	231.171	4.07605	pos	Valyl-Isoleucine	86022	Organic acids and derivatives	Carboxylic acids and derivatives	Amino acids, peptides, and analogues	*		42.9	20.6	M+H	C11H22N2O3	1.09641	2894.57	2875.02	2900.78	3212.83	3301.19	6127.17	2148.88	3687.35	5111.03	3758.65	6287.63	4526.17	2884.83	5950.09	2847.32	3310.73
0.77_137.0711m/z	137.071	0.773167	pos	3-AMINOBENZAMIDE	44363	Unclassified	Unclassified	Unclassified			42.8	19.5	M+H	C7H8N2O	1.30021	28778.6	28679	29996.9	28887.4	32698.1	1439.93	6491.66	12319.8	2466.39	7134.99	5569.99	5346.1	6883.95	11883.2	4653.16	15945.9
0.77_168.0431m/z	168.043	0.769183	neg	Phosphodimethylethanolamine	HMDB0060244	Organic acids and derivatives	Organic phosphoric acids and derivatives	Phosphate esters	**	C13482	42.8	18.3	M-H	C4H12NO4P	-0.281091	25771.5	24963.4	25212.6	26837.7	27777	1235.43	20384	8914.01	4369.24	12380.1	17654.1	24266.3	13752.9	18688.4	8703.92	13988.9
0.79_120.0421n	165.04	0.78745	neg	Erythrose	HMDB0002649	Organic oxygen compounds	Organooxygen compounds	Carbohydrates and carbohydrate conjugates		C01796	42.8	26.7	M+FA-H, 2M-H	C4H8O4	-0.929938	47143.2	50452.6	50064.8	50140.9	50621.2	20456.6	33797.5	15495.5	13595	37144.6	32086.6	31289.2	19683.8	30629.2	13238.5	43153.9
1.21_244.0700n	245.077	1.21112	pos	Pseudouridine	HMDB0000767	Nucleosides, nucleotides, and analogues	Nucleoside and nucleotide analogues	Unclassified	**	C02067	42.8	18.3	M+H, M+Na	C9H12N2O6	1.72718	62190.2	58138.7	56481.8	61317.3	52640	4234.75	168717	21357.6	9805.03	99521	184028	220509	54627.6	95848.7	70491	164567
1.33_283.0916n	282.084	1.33367	neg	8-hydroxy-2'-deoxy Guanosine	44821	Unclassified	Unclassified	Unclassified			42.8	18	M-H, M+FA-H	C10H13N5O5	-0.267713	33177.7	35639.7	33451.2	33972.3	33821.4	2126.65	26841.4	2570.8	993.814	16061.9	62641.8	47516.4	14640	19382.7	68091.2	72137.2
1.38_420.0386m/z	420.039	1.37747	neg	Flumetralin	HMDB0252338	Unclassified	Unclassified	Unclassified			42.8	45.6	M-H	C16H12ClF4N3O4	1.38861	4355.84	5376.16	5317.16	5343.22	5654.15	2549.97	4360.71	1792.6	2283.25	3604.93	6676.96	6723.98	2350.85	4495.85	7644.69	7515.51
10.93_266.1649n	267.172	10.928	pos	Tributyl phosphate	70062	Unclassified	Unclassified	Unclassified			42.8	17	M+H, M+Na	C12H27O4P	0.832805	7188	8181.61	6977.61	6593.7	8344.54	23689.8	11804.9	20144.8	16274.8	13868.9	13505.4	12502.6	13635.6	17136.2	10999.3	17976.3
11.24_622.3724m/z	622.372	11.2384	pos	OS-PC	LMGP20010026	Lipids and lipid-like molecules	Glycerophospholipids	Oxidized glycerophospholipids			42.8	24	M+H	C30H56NO10P	1.57107	29426.8	25344.9	26943.1	24333.7	24671.4	0.934844	0.0651463	1.26918	0.132092	5.88962e-06	0.180347	0.951534	0.807127	0.416899	154.928	4.49976
11.55_278.1521n	279.159	11.5465	pos	Phthalic acid Mono-2-ethylhexyl Ester	44802	Benzenoids	Benzene and substituted derivatives	Benzoic acids and derivatives	*	C03343	42.8	22	M+H, M+Na	C16H22O4	1.21223	391879	369542	369260	358863	360417	476695	364261	453395	464283	423095	400769	396211	327769	424747	245905	391711
12.62_693.4586n	694.466	12.6165	pos	PS(14:0/15:0)	HMDB0112273	Lipids and lipid-like molecules	Glycerophospholipids	Glycerophosphoserines	*		42.8	16.5	M+H, M+Na	C35H68NO10P	0.673623	168361	171523	190193	195505	194753	1003.55	5.88962e-06	202.479	758.996	748.158	438.466	142.615	362.533	5.88962e-06	220.786	5.88962e-06
2.04_394.1287m/z	394.129	2.03985	pos	(gamma-Glutamyl-gamma-glutamyl)-S-methylcysteine	HMDB0039424	Organic acids and derivatives	Carboxylic acids and derivatives	Amino acids, peptides, and analogues			42.8	26.4	M+H	C14H23N3O8S	2.1218	3031.89	2150.38	2071.98	2284.52	2429.81	12592.8	411.133	5.88962e-06	389.486	5.88962e-06	1509.07	7089.09	5.88962e-06	8134.7	5.88962e-06	12641.3
4.61_241.1193m/z	241.119	4.6084	neg	Fasoracetam	HMDB0252174	Unclassified	Unclassified	Unclassified			42.8	16.4	M+FA-H	C10H16N2O2	-0.261619	1223.35	1512.92	1225.95	1431.65	1460.05	953.272	4700.37	2674.66	1174.87	2749.31	2361.64	4111.24	6067.45	2643.47	7611.7	4723.72
4.63_201.0793n	219.113	4.62877	pos	Carbaryl	HMDB0249612	Unclassified	Unclassified	Unclassified			42.8	28.5	M+H, M+NH4	C12H11NO2	1.74455	5938.18	5198.51	5105.43	6563.28	5551.39	1975.82	2639.93	1392.31	1611.52	2043.36	5035.29	4513.39	1086.55	2925.39	815.267	3171.9
7.26_180.1748m/z	180.175	7.25828	pos	Rimantadine	43325	Organic nitrogen compounds	Organonitrogen compounds	Amines		C07236	42.8	18.1	M+H	C12H21N	0.913079	2304.46	2166.61	2055.06	2337.7	2353.53	2162.56	1975.44	1977.65	1996.19	2182.63	2173.24	1962.84	1843.17	2917.06	1961.25	2337.1
9.95_179.1432m/z	179.143	9.95128	pos	Yuzu lactone	HMDB0032901	Phenylpropanoids and polyketides	Macrolides and analogues	Unclassified			42.8	18.5	M+H-H2O	C12H20O2	1.04308	9312.02	8957.69	8951.06	10084.8	9954.39	7864.97	6310.84	7954.82	7798.41	6781.57	7116.13	7207.98	6152	7735.96	5673.62	7801.03
1.68_247.1671m/z	247.167	1.6847	pos	R-cucujolide III	LMFA07040047	Lipids and lipid-like molecules	Fatty Acyls	Fatty esters			42.7	28.9	M+Na	C14H24O2	0.895683	75440.1	91770	99338.6	99904.9	88524.5	120244	75046.8	108690	127989	100580	84988.9	85478.5	64974.7	104589	53718.1	104047
10.71_324.2304n	347.22	10.7058	pos	avocadenyne acetate	LMFA05000714	Lipids and lipid-like molecules	Fatty Acyls	Fatty alcohols			42.7	24.3	M+H, M+Na, M+H-H2O	C19H32O4	1.04293	13272.8	13553.5	13446.6	12882.7	12686.6	8819.85	9487.58	5326.66	9691	17430.5	15042.8	8606.16	10571.9	4437.78	19843	5201.79
10.84_231.1594m/z	231.159	10.836	pos	Dibutyl succinate	72884	Unclassified	Unclassified	Unclassified			42.7	17.7	M+H	C12H22O4	1.34338	15203.9	16189.7	10711.1	10274	13757.7	15154.4	12158.5	15885.5	12698.8	10993.5	10313.7	11902.2	8818.47	12803.2	9858.16	14165.7
11.13_271.1695m/z	271.17	11.1272	pos	2-Hydroxyestradiol	HMDB0000338	Lipids and lipid-like molecules	Steroids and steroid derivatives	Estrane steroids	**	C05301	42.7	17.9	M+H-H2O	C18H24O3	1.00559	14252.2	14127.2	13990.8	14409.5	13801.3	17720.3	11603.5	15472.1	18467.6	14176.7	13608	14161.1	11232.3	15297.9	11013.4	17206.7
11.81_691.4429n	692.45	11.8051	pos	PS(15:0/14:1(9Z))	HMDB0112321	Lipids and lipid-like molecules	Glycerophospholipids	Glycerophosphoserines			42.7	16.6	M+H, M+Na	C35H66NO10P	0.63216	155616	173390	185621	167163	174196	1206.3	519.868	421.199	603.989	1058.9	399.016	390.319	626.637	5.88962e-06	12610.1	734.225
2.17_217.1550m/z	217.155	2.17173	pos	Valyl-Valine	86032	Organic acids and derivatives	Carboxylic acids and derivatives	Amino acids, peptides, and analogues	*		42.6	18	M+H	C10H20N2O3	1.6645	2727.72	2399.16	2923.14	2786.06	2824.08	1142.74	1574.62	470.816	1000.53	948.57	9683.4	4148.55	1689.66	2915.86	2612.51	6608.75
6.53_162.0560m/z	162.056	6.52845	neg	4-Hydroxy-4-(3-pyridyl)-butanoic acid	HMDB0001119	Organoheterocyclic compounds	Pyridines and derivatives	Unclassified	**	C19579	42.6	18.5	M-H2O-H	C9H11NO3	-0.27596	214.681	278.367	277.791	304.255	277.262	3434.08	2134.71	2826.18	6692.9	1831.89	1049.05	1278.8	2784.57	3071.85	1446.14	882.428
0.85_144.1021m/z	144.102	0.84955	pos	xi-4-Hydroxy-4-methyl-2-cyclohexen-1-one	HMDB0033629	Organic oxygen compounds	Organooxygen compounds	Carbonyl compounds			42.5	21.7	M+NH4	C7H10O2	1.55617	152020	154876	140174	153340	162192	127560	68744.7	103148	122401	106112	16318.2	43748.6	65015.5	49055.2	10152.7	37982.4
1.15_186.1129m/z	186.113	1.14785	pos	PRIMA-1	64852	Unclassified	Unclassified	Unclassified			42.5	25.3	M+H	C9H15NO3	2.14292	627.711	708.468	856.702	933.461	682.106	603.395	617.141	383.723	1053.73	365.904	1330.79	1298.75	338.97	969.914	385.154	1544.37
1.30_282.0064m/z	282.006	1.29677	pos	Thioxanthine monophosphate	HMDB0060876	Organoheterocyclic compounds	Imidazopyrimidines	Purines and purine derivatives	*		42.5	18.1	M+NH4	C5H5N4O5PS	2.89383	11063.4	11196.9	12291.9	12489	11774.1	2933.29	6962.14	3038.73	3183.1	4887	5565.5	7412.66	8850.38	6913.58	6341.69	3355.9
1.65_215.1395m/z	215.139	1.64797	pos	Prolyl-Valine	85923	Organic acids and derivatives	Carboxylic acids and derivatives	Amino acids, peptides, and analogues	*		42.5	18.8	M+H	C10H18N2O3	2.05428	1584.36	1752.53	1987.9	2090.73	1960.29	2541.34	815.233	288.182	1191.49	610.945	1739.3	1315.51	1149.09	3853.04	723.642	990.536
4.79_275.1038m/z	275.104	4.79252	neg	Glutamylphenylalanine	HMDB0029156	Organic acids and derivatives	Carboxylic acids and derivatives	Amino acids, peptides, and analogues	*		42.5	18.8	M-H2O-H	C14H18N2O5	0.220303	377.459	423.89	396.37	518.92	532.252	758.513	2336.38	1221.24	850.129	1966.95	662.357	756.391	3769.16	1049.08	1611.07	1144.6
5.17_200.1292m/z	200.129	5.17438	neg	2,2,6,6-Tetramethyl-4-piperidinone	HMDB0031179	Organoheterocyclic compounds	Piperidines	Piperidinones	*		42.5	14.8	M+FA-H	C9H17NO	0.146665	2094.74	2264.08	2145.2	2436.39	2146.87	3371.68	2653.83	3568.46	3670.85	3382.67	3144.04	3370.62	3684.46	2973.25	3711.12	3422.07
5.39_243.1474n	266.137	5.39298	pos	N-(3-hydroxy-octanoyl)-homoserine lactone	LMFA08030036	Lipids and lipid-like molecules	Fatty Acyls	Fatty amides			42.5	17.5	M+H, M+Na	C12H21NO4	1.2524	6888.24	6255.23	6742.76	6733.16	7215.13	6348.55	5833.13	6145.96	5765.01	6134.06	6742.77	5964.16	5075.32	6680.88	3249.82	6921.36
7.02_164.0716m/z	164.072	7.0204	neg	Methylnoradrenaline	HMDB0002832	Benzenoids	Benzene and substituted derivatives	Phenylpropanes	*	C17925	42.5	16	M-H2O-H	C9H13NO3	-0.722276	255.177	218.107	215.478	231.808	335.724	7706.91	1045.3	4864.84	10850.1	4032.29	515.902	874.851	2389.39	4079.25	1035.18	554.058
0.75_445.0535m/z	445.054	0.748083	neg	CDP-ethanolamine	HMDB0001564	Nucleosides, nucleotides, and analogues	Pyrimidine nucleotides	Pyrimidine ribonucleotides	**	C00570	42.4	18.7	M-H	C11H20N4O11P2	0.935037	68339	66642.7	64529	67911.9	70686.2	1973.48	29917.7	4856.32	883.3	7713.54	26113.5	38049	30142.6	18703.2	33264.3	23093.2
0.81_405.0101m/z	405.01	0.809917	pos	Uridine 5'-diphosphate	HMDB0000295	Nucleosides, nucleotides, and analogues	Pyrimidine nucleotides	Pyrimidine ribonucleotides	**	C00015	42.4	22.6	M+H	C9H14N2O12P2	1.66958	56153.9	63157.5	61696	62061.6	63363.5	15028.7	177.429	1485.08	15770.8	10003.5	5684.11	5.88962e-06	451.305	5363.14	50.9987	2170.42
0.87_132.0125m/z	132.012	0.868767	neg	(S)C(S)S-S-Methylcysteine sulfoxide	HMDB0029432	Organic acids and derivatives	Carboxylic acids and derivatives	Amino acids, peptides, and analogues	*		42.4	17.1	M-H2O-H	C4H9NO3S	0.116614	1049.85	924.474	1248.77	1042.83	1095.83	5.88962e-06	4080.23	279.122	23.6721	113.131	5001.43	4185.3	1645.66	1105.08	242.822	1029.3
0.89_152.0568m/z	152.057	0.8917	pos	8-Hydroxyadenine	5527	Organoheterocyclic compounds	Imidazopyrimidines	Purines and purine derivatives	*		42.4	24.7	M+H	C5H5N5O	1.04185	53753	52575.8	43860.3	57047.8	59982.8	13610.7	11639	7800.31	9282.98	7312.83	23322.5	13818.3	10474.4	18115.8	15823.7	24385.1
0.91_307.0835n	308.091	0.911433	pos	Stealthin C	63770	Unclassified	Unclassified	Unclassified			42.4	24.5	M+H, M+Na	C18H13NO4	-2.97982	803233	814191	816302	754476	751285	582595	74611.7	15726.5	79904.2	19436.2	1.18471e+06	1.70997e+06	7118.05	751902	9272.35	2.08127e+06
1.86_189.1238m/z	189.124	1.8562	pos	Valyl-Alanine	86012	Organic acids and derivatives	Carboxylic acids and derivatives	Amino acids, peptides, and analogues	*		42.4	18.5	M+H	C8H16N2O3	2.38043	4257.53	4444.98	4757.47	5190.73	4333.21	1860.46	2679.48	739.341	1173.47	1034.32	8537.59	7063.96	4124.76	6245.75	4143.01	4168.91
10.02_119.0859m/z	119.086	10.0225	pos	4-Ethyl-2-methylphenol	HMDB0038984	Benzenoids	Phenols	Cresols			42.4	24.5	M+H-H2O	C9H12O	2.66052	3651.91	3340.07	3801.92	3788.64	3436	2727.48	2764.46	2699.09	3104.58	2994.54	2519.78	2096.46	2109.88	3390.66	1852.45	3480.64
10.25_244.2273m/z	244.227	10.2487	pos	2-amino-tetradecanoic acid	74860	Lipids and lipid-like molecules	Fatty Acyls	Fatty Acids and Conjugates			42.4	18.7	M+H	C14H29NO2	0.982297	4460.58	4221.86	4139.77	4202.13	4686.26	5221.71	4023.55	3870.86	4169.61	3376.3	3784.21	4004.2	2981.64	4299.29	3597.26	4656.82
11.15_326.2249n	327.232	11.1497	pos	15beta-Hydroxydesogestrel	HMDB0060707	Lipids and lipid-like molecules	Steroids and steroid derivatives	Estrane steroids	*		42.4	18.2	M+H-H2O, M+H	C22H30O2	0.938686	6707.98	6540.41	5973.85	7091.91	6551.69	6126.5	12630.8	11750.2	13753.9	16309.6	585.758	2094.4	68871	15088.6	4475.22	63.2228
11.61_319.2254m/z	319.225	11.6131	pos	15(S)-HpETE	3846	Lipids and lipid-like molecules	Fatty Acyls	Eicosanoids	**	C05966	42.4	24.6	M+H-H2O	C20H32O4	-3.96739	24048.6	24033.1	25432.3	22504.9	21944.7	9704.81	9737.86	10600.2	11606.5	14373.8	10157	8500.12	10070.2	10636.7	5816.67	9760.91
11.72_455.3137m/z	455.314	11.7236	pos	24-Hydroxycalcitriol	HMDB0006228	Lipids and lipid-like molecules	Steroids and steroid derivatives	Vitamin D and derivatives	*		42.4	20.3	M+Na	C27H44O4	1.21061	10276.8	9683.25	10398.7	9884.53	11116.3	97.7829	101.875	120.412	5.88962e-06	354.099	5.88962e-06	114.961	5.88962e-06	5.88962e-06	5.88962e-06	5.88962e-06
4.50_375.2309m/z	375.231	4.50327	pos	Isolinderanolide	HMDB0038105	Organoheterocyclic compounds	Tetrahydrofurans	Unclassified			42.4	28.2	M+K	C21H36O3	3.82304	483.769	495.031	544.48	486.839	350.431	5876.17	28206.5	9489.3	51002.1	1942.97	430.465	2124.53	41851.2	8750.35	42784.5	1550.81
4.50_562.2992m/z	562.299	4.50327	pos	Physagulin C	LMST01160049	Lipids and lipid-like molecules	Steroids and steroid derivatives	Steroid lactones	*		42.4	38.2	M+NH4	C30H40O9	-3.36498	619.546	710.915	733.787	538.013	803.019	5407.64	28256.3	10196.8	46510.1	2645.5	1945.05	2043.8	42628.5	8354.53	30292.6	2141.25
4.81_283.0824m/z	283.082	4.8138	neg	p-Cresol glucuronide	HMDB0011686	Organic oxygen compounds	Organooxygen compounds	Carbohydrates and carbohydrate conjugates	*		42.4	15.9	M-H	C13H16O7	0.167234	3408.35	3246.82	3098.87	3478.63	4623.66	5.88962e-06	13.8378	141.79	5.88962e-06	603.047	5.88962e-06	5.88962e-06	5.88962e-06	489.811	189.531	384.548
9.67_396.2511n	395.244	9.66798	neg	PGF2alpha-11-acetate	LMFA03010096	Lipids and lipid-like molecules	Fatty Acyls	Eicosanoids			42.4	18.2	M-H, M+FA-H	C22H36O6	-0.140165	11691.1	11614.6	10897.5	11836.5	11459.1	11770.4	11621.9	10528.6	12368	10870.5	11710.2	14241.7	12543.5	12284	16448.8	14408.5
1.04_219.0141m/z	219.014	1.04312	neg	Dehydroascorbide(1-)	HMDB0062706	Organoheterocyclic compounds	Dihydrofurans	Furanones			42.3	17.5	M+FA-H	C6H6O6	-3.02741	14230	14987.1	14506	15612	15529.7	188.422	4140.09	2345.76	556.804	2370.89	8674.93	7181.89	4011.62	3966.6	2557.08	8632.55
1.19_203.1395m/z	203.139	1.1916	pos	ALANYL-dl-LEUCINE	44268	Unclassified	Unclassified	Unclassified			42.3	21.2	M+H	C9H18N2O3	2.24925	748.598	914.098	894.247	918.924	869.42	14510.9	1425.66	5377.03	18541.7	8291.28	1721.9	953.546	2335.21	5925.73	1601.5	2794.16
1.23_206.0486m/z	206.049	1.233	pos	p-Cresol sulfate	HMDB0011635	Organic acids and derivatives	Organic sulfuric acids and derivatives	Arylsulfates	*		42.3	21.6	M+NH4	C7H8O4S	2.28576	14011.9	12979.7	12218.6	12334	12472.7	219.442	8539.4	1940.51	226.578	2876.55	6708.74	2918.78	2970.11	3057.07	1880.08	3223.13
1.54_130.0873m/z	130.087	1.54307	neg	Aminocaproic acid	HMDB0001901	Lipids and lipid-like molecules	Fatty Acyls	Fatty acids and conjugates	**	C02378	42.3	14.9	M-H	C6H13NO2	-0.611422	6715.06	7572.02	8212.82	8209.12	8666.25	2654.1	9295.89	4134.94	2256.42	4945.66	7743.03	10197	8840.09	8056.52	10875.9	5608.34
12.06_311.1686m/z	311.169	12.0577	neg	N-Undecylbenzenesulfonic acid	HMDB0032549	Benzenoids	Benzene and substituted derivatives	Benzenesulfonic acids and derivatives			42.3	16.9	M-H	C17H28O3S	-0.193219	640923	649793	639168	633953	647803	815037	757229	864093	933137	743290	689312	674446	724171	909191	786464	792266
5.14_403.2263n	426.217	5.14018	pos	metergoline	HMDB0254511	Unclassified	Unclassified	Unclassified			42.3	30.4	M+NH4, M+Na	C25H29N3O2	0.812188	2130.94	2052.57	1957.6	2494.45	2517.81	2581.12	2069.28	2612.59	2337.57	4002.79	2407.62	6696.95	2015.02	4659.83	74512	4503.35
7.22_378.1510m/z	378.151	7.22002	neg	2-(Arabinosylamino)-3-(glucosylamino)propanenitrile	HMDB0039505	Organic oxygen compounds	Organooxygen compounds	Carbohydrates and carbohydrate conjugates			42.3	17.7	M-H	C14H25N3O9	-2.16203	6963.55	6560.87	6927.89	7981.51	6737.06	8551.65	7046.72	6883.12	9019.13	8300.89	6345.07	7371.3	7186	10009.1	11647.5	7589.33
9.81_195.1390m/z	195.139	9.8103	neg	8E-Hydroxy-4,8-dimethyl-4,9-decadienal	LMFA06000145	Lipids and lipid-like molecules	Fatty Acyls	Fatty aldehydes			42.3	14.5	M-H	C12H20O2	-0.192001	5088.18	6649.76	5728.14	5679.75	5319.83	7722.15	7148.07	7921.7	9717.7	7484.26	6791.6	7397.44	7426.3	7389.08	8330.17	6943.41
1.30_240.1477n	241.155	1.29677	pos	Pirbuterol	HMDB0015407	Organoheterocyclic compounds	Pyridines and derivatives	Hydroxypyridines		C07807	42.2	15	M+H, M+Na, M+K	C12H20N2O3	1.43902	183603	182317	187285	191507	194796	466490	38066.5	161588	444861	138768	33250.8	38585.7	68789.3	158344	23544.9	24116.3
11.20_293.2122m/z	293.212	11.1989	neg	(all-Z)-8,11,14-Heptadecatrienal	HMDB0041333	Lipids and lipid-like molecules	Fatty Acyls	Fatty aldehydes	**	C16343	42.2	12.7	M+FA-H	C17H28O	-0.162728	61080.4	67738.8	75748.6	75597.2	72350.3	4286.23	3431.81	3949.68	4231.3	6894.21	5153.17	5466.7	2962.02	6281.91	5661.64	6110.18
12.84_311.2561m/z	311.256	12.8406	pos	METHOPRENE (S)	44012	Unclassified	Unclassified	Unclassified			42.2	24	M+H	C19H34O3	-6.4764	50983	52185.2	53745.7	45846.7	44875.9	43317.4	38414	45344.3	46753	47948.9	44252.4	40452.6	31873.9	39476.6	26076.5	41713.9
3.90_304.0152n	305.023	3.89823	pos	7-Chloroemodin	LMPK13040004	Lipids and lipid-like molecules	Polyketides	Aromatic polyketides		C10311	42.2	40.2	M+H, M+Na	C15H9ClO5	4.53658	6586.22	5319.58	6363.5	7533.27	7036.77	2155.86	3626.12	1484.62	1642.85	1306.35	4898.38	4651.26	2148.63	1217.36	2125.08	2579.26
6.24_310.2012m/z	310.201	6.23767	pos	Acetylbalchanolide	HMDB0036693	Lipids and lipid-like molecules	Prenol lipids	Terpene lactones	*		42.2	15.9	M+NH4	C17H24O4	-0.188489	1687.54	1791.08	1619.74	1723.86	2037.17	2340.71	2931.19	1940.57	332.012	6600.37	11503.8	4461.77	1492.17	2654.35	5227.74	6281.68
9.25_388.3061m/z	388.306	9.24657	pos	2-Hydroxymyristoylcarnitine	LMFA07070033	Lipids and lipid-like molecules	Fatty Acyls	Fatty acid esters	*		42.2	15.9	M+H	C21H41NO5	1.03013	15082.2	14238.8	15474	13018.5	13653.5	83.6408	6770.12	1132.33	483.735	2611.45	37529.3	50687.7	1459.11	6961.81	2199.66	5837.31
9.80_258.2795m/z	258.279	9.80118	pos	9-hexadecen-1-ol	LMFA05000030	Lipids and lipid-like molecules	Fatty Acyls	Fatty alcohols			42.2	15.4	M+NH4	C16H32O	1.37824	10304.1	9212.58	10143.7	10135.3	10356.7	11494.1	7115.8	9015.35	9163.91	8649.48	6616.77	10297.1	7431.56	9077.88	13913	12709.2
9.95_236.0928m/z	236.093	9.95472	neg	3-Hydroxy-carbofuran	HMDB0032775	Organoheterocyclic compounds	Coumarans	Unclassified			42.2	14.6	M-H	C12H15NO4	-0.342041	16519.8	18837.5	19326.9	21101.6	19731.8	21758	17852.2	18615.5	25065.1	18452.6	21232.9	20143.6	21139.6	22532	20804.4	22726.7
0.77_272.0678n	253.05	0.769183	neg	Toralactone	HMDB0038549	Organoheterocyclic compounds	Naphthopyrans	Naphthopyranones		C17673	42.1	21.4	M-H2O-H, M-H	C15H12O5	-2.35055	36587.3	37448.3	34864.6	38977.1	35815.1	3638.66	30337.2	4639.04	2258.33	9507.47	42078.8	25464.3	10320.9	15550.6	2203	11491
0.85_134.1177m/z	134.118	0.84955	pos	1,2-Cyclohexanediol	HMDB0244061	Unclassified	Unclassified	Unclassified			42.1	16.6	M+NH4	C6H12O2	1.21646	15166.7	15748.9	13555.9	13579.3	16020.1	1479.52	104877	26280.7	8206.38	15846.1	60403.2	43588.7	87020.8	52911	24402.5	12084.5
1.15_364.0429n	365.05	1.14785	pos	Oxipurinol-7-ribonucleotide	868	Unclassified	Unclassified	Unclassified			42.1	18.7	M+H, M+Na	C10H13N4O9P	2.33288	13546.8	13049.3	11859.3	13532.4	12695.6	1247.77	426.143	60.5712	1670.49	2302.69	497.7	93.0354	130.997	1881.14	5.88962e-06	163.601
1.18_655.1086m/z	655.109	1.1804	neg	Bryaquinone	LMPK12070143	Lipids and lipid-like molecules	Polyketides	Flavonoids			42.1	22.8	2M-H	C17H12O7	-1.18127	169370	260258	289570	324813	220588	491214	148158	143140	498228	190224	139441	154585	104570	217062	67945.1	201574
1.52_153.0661m/z	153.066	1.51642	pos	N-Methyl-2-pyridone-5-carboxamide (Nudifloramide)	1501	Unclassified	Unclassified	Unclassified			42.1	16.6	M+H	C7H8N2O2	1.73274	9170.28	8697.16	8850.64	9225.03	9373.13	2997.06	1362.99	2449.47	1567.58	1738.39	1934.01	667.375	2031.56	1718.99	1313.15	2065.11
10.69_351.2532m/z	351.253	10.6885	pos	MG(0:0/18:4(6Z,9Z,12Z,15Z)/0:0)	62325	Lipids and lipid-like molecules	Fatty Acyls	Lineolic acids and derivatives	*		42.1	22.8	M+H	C21H34O4	0.639889	7202.31	7139.24	6463.05	6870.54	6435.49	2.74225	2.72771	6.9896	5.88962e-06	0.598271	0.934039	63.0424	119.299	10.021	75.4532	86.9302
10.87_239.0673m/z	239.067	10.8658	neg	3-Methyluridine	HMDB0004813	Nucleosides, nucleotides, and analogues	Pyrimidine nucleosides	Unclassified	*		42.1	14.3	M-H2O-H	C10H14N2O6	-0.263718	75762.1	77266.1	75897	77959.3	75300.1	90735	81136	87846.2	99740.8	78873.2	77422.1	85701.7	81562.5	81915.1	90174	94153.7
11.63_307.2635m/z	307.263	11.6349	pos	8,11,14-Eicosatrienoic acid	HMDB0002925	Lipids and lipid-like molecules	Fatty Acyls	Fatty acids and conjugates	***	C03242	42.1	18.2	M+H	C20H34O2	1.06203	1010.93	943.825	1051.14	1170.87	1020.56	430.271	226.322	299.967	636.427	3468.09	486.066	378.366	3748.5	1977.86	573.863	301.038
2.25_215.1394m/z	215.139	2.25428	pos	Valyl-Proline	86027	Organic acids and derivatives	Carboxylic acids and derivatives	Amino acids, peptides, and analogues	*		42.1	15.2	M+H	C10H18N2O3	2.01263	4905.27	4835.4	4820.27	5182.49	5385.3	4646.84	22934.1	12767.2	28183.5	4135.07	12111.7	7395.78	96450.4	7023.57	21506.6	3871.2
4.69_302.1969m/z	302.197	4.68713	pos	3-hydroxy-cis-5-octenoylcarnitine	LMFA07070038	Lipids and lipid-like molecules	Fatty Acyls	Fatty esters			42.1	17	M+H	C15H27NO5	2.28655	6469.77	6459.27	5576.22	6771.68	6147.05	36.7655	347.277	121.685	134.66	312.072	1817.96	915.987	128.881	1220.29	10.43	661.539
4.70_180.0666m/z	180.067	4.70345	neg	2,3-Dihydro-1H-pyrrolizine-5-carboxaldehyde	HMDB0040008	Organoheterocyclic compounds	Pyrrolizines	Unclassified			42.1	13.1	M+FA-H	C8H9NO	0.17443	227.082	131.24	203.687	222.998	167.257	2380.11	964.587	1537.15	3611.95	1264.42	651.45	674.465	1172.8	1538.61	634.153	403.275
7.23_352.2461m/z	352.246	7.23227	pos	4,8 Dimethylnonanoyl carnitine	HMDB0006202	Lipids and lipid-like molecules	Fatty Acyls	Fatty acid esters	*		42.1	17.8	M+Na	C18H35NO4	0.935728	77918.4	82278.3	79527	81282.2	89159.9	71287.3	64126.7	72706.2	79837.4	70320.2	75341.9	74684.3	61672.2	84198.8	53776.4	76250.5
0.91_173.0923m/z	173.092	0.911433	pos	N-(gamma-Glutamyl)ethanolamine	HMDB0039222	Organic acids and derivatives	Carboxylic acids and derivatives	Amino acids, peptides, and analogues			42	15.6	M+H-H2O	C7H14N2O4	1.30136	14256.1	15399.2	14497.9	13455.5	14528.2	3353.1	16567.7	2207.09	4314.09	4482.97	28295.9	21926	24968.8	10812.4	11185.8	7629.4
1.66_261.1450m/z	261.145	1.6571	pos	Isoleucyl-Glutamate	HMDB0028906	Organic acids and derivatives	Carboxylic acids and derivatives	Amino acids, peptides, and analogues	*		42	18.7	M+H	C11H20N2O5	1.89826	1622.37	1668.83	2352.21	2363.75	2113.29	1886.74	1599	906.425	1895.52	1143.6	5909.56	3286.24	2410.45	3467.3	2037.97	2249.22
10.69_285.2671n	308.256	10.6885	pos	C17 Sphingosine	LMSP01040002	Lipids and lipid-like molecules	Sphingolipids	Sphingoid bases			42	16.2	M+H-H2O, M+Na	C17H35NO2	1.1975	10328.5	12345.8	12418.3	11462.3	10334.3	12083.7	10929.9	9626.54	12672.3	10445	13389.1	10301.2	11906.6	14952.9	7096.12	11574.5
14.77_125.0712m/z	125.071	14.7693	pos	Piracetam	HMDB0256585	Unclassified	Unclassified	Unclassified			42	14	M+H-H2O	C6H10N2O2	1.72488	227290	235048	248366	251966	256999	247528	216917	248004	262611	254594	241001	219651	193218	251133	167725	242534
3.92_146.1179m/z	146.118	3.91993	pos	delta-heptenoic acid	LMFA01030015	Lipids and lipid-like molecules	Fatty Acyls	Fatty Acids and Conjugates			42	18.1	M+NH4	C7H12O2	2.35124	3323.5	2973.24	2870.1	2725.76	2620.18	285.861	581.364	245.775	237.564	249.378	2557.53	3226.71	206.554	443.241	544.123	910.27
5.02_259.1518m/z	259.152	5.02147	pos	Tetrahydrobiopterin	HMDB0000027	Organoheterocyclic compounds	Pteridines and derivatives	Pterins and derivatives	**	C00272	42	15.6	M+NH4	C9H15N5O3	2.16314	107.243	108.216	84.8347	177.273	111.908	3484	12471.7	9036.48	6973.56	12066.8	8868.64	9098.01	6192.41	4574.31	1654.56	13058
1.15_221.0595m/z	221.059	1.14785	pos	AMCC	69065	Organic acids and derivatives	Carboxylic acids and derivatives	Amino acids, peptides, and analogues	*	C11490	41.9	18	M+H	C7H12N2O4S	1.99088	2987.38	2950.04	3016.34	3059.35	2805.63	1683.49	1726.24	2890.02	1941.36	4744.23	2167.13	1649.2	1757.55	1921.83	825.176	4532.35
1.18_633.1266m/z	633.127	1.1804	neg	Kolaflavanone	LMPK12040002	Lipids and lipid-like molecules	Polyketides	Flavonoids		C09761	41.9	21.9	M+FA-H	C31H24O12	2.72303	436226	646995	794895	897717	597362	1.15298e+06	273993	259301	1.00668e+06	324517	316164	305261	189159	459140	122865	423360
10.93_104.1075m/z	104.107	10.928	pos	Neurine	87532	Unclassified	Unclassified	Unclassified			41.9	15.9	M+H	C5H13NO	4.53374	4724.56	6479.07	5422.32	5513.03	6378.21	4449.78	2984.93	2628.03	1399.65	3206.18	2685.87	3062.37	1743.04	2735.59	1595.09	2656.97
11.19_454.3896m/z	454.39	11.1941	pos	(11Z)-Eicoseneoylcarnitine	HMDB0240746	Lipids and lipid-like molecules	Fatty Acyls	Fatty esters			41.9	16.7	M+H	C27H51NO4	1.06845	2649.45	2766.02	3202.47	3138.86	3203.15	11541.1	7695.84	1832.31	11000	2287.36	35182.5	29782.4	722.734	2502.56	5943.11	4208.89
11.25_284.2230m/z	284.223	11.2463	neg	Myristoylglycine	HMDB0013250	Organic acids and derivatives	Carboxylic acids and derivatives	Amino acids, peptides, and analogues	*		41.9	14.7	M-H	C16H31NO3	-0.314922	7602.53	8199.34	6997.02	8417.88	6803.51	3336.82	3486.6	3229.54	3371.17	3348.8	3760.08	5000.44	2513.86	3935.22	4573.64	5025.07
11.68_256.2637m/z	256.264	11.6787	pos	Palmitic amide	HMDB0012273	Lipids and lipid-like molecules	Fatty Acyls	Fatty amides	***		41.9	13.8	M+H	C16H33NO	0.870017	792606	777212	757819	742859	755514	925393	764622	832868	933582	817156	790963	724843	625756	816691	471618	760469
4.34_290.1610m/z	290.161	4.34083	neg	Isovalerylcarnitine	HMDB0000688	Lipids and lipid-like molecules	Fatty Acyls	Fatty acid esters	*		41.9	11.9	M+FA-H	C12H23NO4	0.367965	4396.46	4294.13	4603.57	6319.07	4761.53	5.88962e-06	75.7698	89.9721	116.863	110.626	464.267	182.436	47.3182	50.6195	242.142	231.987
4.89_245.1864m/z	245.186	4.89478	pos	NH-DVal(NMe)-Val-OMe	65477	Unclassified	Unclassified	Unclassified			41.9	14.5	M+H	C12H24N2O3	1.74228	1066.23	789.504	879.77	1093.62	1237.75	1046.27	1800.63	799.961	1042.82	872.72	3329.29	3183.43	2322.59	3395.14	799.65	1464.27
0.79_380.0895n	379.082	0.78745	neg	Tephcalostan C	LMPK12090003	Lipids and lipid-like molecules	Polyketides	Flavonoids			41.8	22.5	M-H, M+FA-H	C21H16O7	-0.262773	57751	60319.4	54449.1	68094.4	61799.2	42235	124820	241760	53419.9	136936	89104.9	42562.6	86827.7	36626.1	159887	59927.4
0.83_263.1465m/z	263.147	0.829667	pos	Streptidine	HMDB0258506	Unclassified	Unclassified	Unclassified			41.8	11.9	M+H	C8H18N6O4	1.20959	198696	184946	194827	203266	188794	10085.6	30092.3	10263.7	3878.83	24272.7	30561.3	29246.3	20997	16839.8	13742	51002.7
0.91_210.0442m/z	210.044	0.90975	neg	Ethiin	HMDB0037057	Organic acids and derivatives	Carboxylic acids and derivatives	Amino acids, peptides, and analogues			41.8	13.9	M+FA-H	C5H11NO3S	0.414408	8852.98	8605.93	9110.46	9339.66	10818	211.136	2675.84	58.6061	237.743	298.615	2091.26	4330.92	421.955	8088.05	5.88962e-06	7889.85
1.93_245.1501m/z	245.15	1.9278	pos	Isoleucylhydroxyproline	HMDB0028908	Organic acids and derivatives	Carboxylic acids and derivatives	Amino acids, peptides, and analogues	*		41.8	15	M+H	C11H20N2O4	2.25443	14125.8	14527.1	14979.2	14595.7	14634	19.2641	2205.08	472.844	227.91	2830.63	7117.13	12964.5	745.927	2454.76	1566.27	7203.08
10.40_123.0807m/z	123.081	10.3963	pos	3-Propyl-1,2-cyclopentanedione	HMDB0039651	Organic oxygen compounds	Organooxygen compounds	Carbonyl compounds			41.8	18.8	M+H-H2O	C8H12O2	2.06403	9083.39	9290.81	8641.75	9550.49	9512.15	9392.76	8025.38	9212.39	9408.58	8278.54	8195.55	7044.89	6407.88	8750.74	5482.72	9294.65
10.57_479.3128m/z	479.313	10.5659	pos	Momordol	HMDB0029804	Lipids and lipid-like molecules	Fatty Acyls	Fatty alcohols	*		41.8	19.3	M+K	C26H48O5	-1.14073	13511.2	12038	9339.09	12086.3	9708.33	1896.37	526.275	1158.91	966.48	1473.75	1266.88	682.817	1002.09	984.362	554.266	923.995
10.61_453.2981m/z	453.298	10.6137	pos	3beta,5alpha,9alpha-trihydroxycholesta-7,14-dien-6-one	LMST01010261	Unclassified	Unclassified	Unclassified			41.8	16.1	M+Na	C27H42O4	1.39946	19950.6	21053.5	17319.3	21497.8	21949.9	101.617	618.693	461.479	283.874	135.882	526.926	79.7426	192.79	449.696	191.781	408.057
13.38_346.3086n	369.298	13.3789	pos	1-O-(2-methoxy-hexadecyl)-sn-glycerol	LMGL01020037	Lipids and lipid-like molecules	Glycerolipids	Monoradylglycerols			41.8	13.5	M+NH4, M+Na, M+H	C20H42O4	0.705556	1.12447e+06	1.13357e+06	1.19522e+06	1.18754e+06	1.15546e+06	1.20992e+06	999952	1.2271e+06	1.22291e+06	1.22588e+06	1.09452e+06	1.09007e+06	917674	1.21243e+06	780046	1.16587e+06
3.98_373.2092m/z	373.209	3.98497	pos	pre-putrebactin	LMFA08020201	Lipids and lipid-like molecules	Fatty Acyls	Fatty amides			41.8	18.8	M+H-H2O	C16H30N4O7	2.73913	931.104	1055.86	1476.49	1166.98	1317.97	150.673	4100.06	1804.27	155.885	1462.59	1961.74	1915.77	7543.24	2086.21	2915.3	1277.51
4.13_244.1549m/z	244.155	4.13148	pos	3-Hydroxyisovalerylcarnitine	HMDB0061189	Lipids and lipid-like molecules	Fatty Acyls	Fatty acid esters	*		41.8	17.5	M+H-H2O	C12H23NO5	2.22505	2122.29	2450.27	3326.03	2339.22	2350.67	1390.47	444.961	1137.22	1179.71	718.685	1189.7	687.705	458.317	703.954	947.047	1803.87
4.75_121.0295m/z	121.029	4.75245	neg	Ethyl maltol	HMDB0031735	Organoheterocyclic compounds	Pyrans	Pyranones and derivatives	*	C20362	41.8	14.5	M-H2O-H	C7H8O3	-0.296725	2696.02	2459.32	3046.85	3214.37	3084.75	5196.57	3879.82	4637.35	6910.72	5442.22	3449.14	4009.86	7454.78	10045.2	6108.43	4210.92
5.10_211.0976m/z	211.098	5.0967	neg	Epinepetalactone	HMDB0035063	Lipids and lipid-like molecules	Prenol lipids	Terpene lactones	*		41.8	12	M+FA-H	C10H14O2	0.111042	785.801	801.511	929.034	908.611	796.511	430.043	2365.48	2540.56	1288.19	1886	338.911	1428.19	354.41	879.779	852.037	386.741
0.87_200.0089n	222.998	0.870567	pos	D-Erythrose 4-phosphate	HMDB0001321	Organic oxygen compounds	Organooxygen compounds	Carbohydrates and carbohydrate conjugates	**	C00279	41.7	13.4	M+Na, M+K, M+H	C4H9O7P	1.65819	16817.3	16386.4	16292.4	16834.2	17878.9	6555.56	16183.9	2051.57	4645.06	6984.88	16565.8	12120.6	8116.97	11208.7	5219.69	10543.7
1.08_193.0744n	211.106	1.08162	pos	N-Formylphenylalanine	HMDB0240317	Organic acids and derivatives	Carboxylic acids and derivatives	Amino acids, peptides, and analogues			41.7	17.4	M+H, M+NH4	C10H11NO3	2.59651	968.479	1078.44	1136.67	1571.67	1326.88	424.155	2458.38	719.004	384.961	759.771	2211.61	1885.73	2207.79	1063.42	1451.54	698.462
1.15_227.0911n	250.08	1.14785	pos	Cytosine deoxyribonucleoside	HMDB0250725	Nucleosides, nucleotides, and analogues	Pyrimidine nucleosides	Pyrimidine 2'-deoxyribonucleosides	**	C00881	41.7	16.1	M+Na, M+K	C9H13N3O4	2.29967	11831.8	20265.9	19236.7	10080.3	16574.6	5.88962e-06	506.45	158.325	37.3774	981.068	579.985	1441.05	25.0984	193.767	99.928	1615.56
1.36_473.0538m/z	473.054	1.35522	neg	S-Cysteinosuccinic acid	HMDB0029418	Organic acids and derivatives	Carboxylic acids and derivatives	Amino acids, peptides, and analogues	*		41.7	19.4	2M-H	C7H11NO6S	-0.666813	22281	18538.3	16660.5	23263.4	27948.4	548.56	6287.3	457.531	864.772	4352.96	10562.9	8829.87	1823.37	5206.64	6061.23	15133.3
1.38_693.1110m/z	693.111	1.37747	neg	5'-Hydroxypiroxicam	HMDB0014096	Organoheterocyclic compounds	Benzothiazines	Unclassified	*		41.7	23	2M-H	C15H13N3O5S	4.38913	35075.2	38975.1	42138.6	41251	40842.5	3007.67	19402	2149.78	3623.28	12174.3	65121.2	62667.3	5900.79	20217.2	79026.8	78817.3
1.71_189.1240m/z	189.124	1.7073	pos	Isoleucyl-Glycine	85813	Organic acids and derivatives	Carboxylic acids and derivatives	Amino acids, peptides, and analogues	*		41.7	20.2	M+H	C8H16N2O3	3.26137	800.09	728.853	752.622	795.525	887.072	800.597	318.123	244.875	612.017	166.891	1045.2	603.829	346.808	599.382	1580.26	895.999
10.07_128.1205n	129.128	10.073	pos	Octanal	6033	Organic oxygen compounds	Organooxygen compounds	Carbonyl compounds	*	C01545	41.7	15	M+H-H2O, M+H	C8H16O	2.94105	4428.59	4281.07	4645.01	3468.6	3933.88	4853.39	4161.22	5138.84	4897.11	3933.65	3963.37	3535.94	3794.17	5080.87	2960.06	3414.78
11.06_282.2198n	265.216	11.062	pos	7-hydroxy-10-heptadecen-8-ynoic acid	LMFA01050260	Lipids and lipid-like molecules	Fatty Acyls	Fatty Acids and Conjugates			41.7	20.7	M+H-H2O, M+H	C17H30O3	0.919688	1011.96	940.947	791.565	913.05	941.395	629.907	426.06	258.726	606.395	490.458	4262.13	2530.61	835.187	709.476	748.278	364.909
11.92_297.2433m/z	297.243	11.9218	neg	10-Oxooctadecanoic acid	HMDB0030980	Lipids and lipid-like molecules	Fatty Acyls	Fatty acids and conjugates	*		41.7	15.6	M-H	C18H34O3	-0.684042	7280.08	7087.98	6146.69	6961.49	6807.03	4376.11	3830.41	5153.51	4441.36	6794.99	3908.08	9758.39	5202.29	6549.18	80416.4	5416.07
3.88_276.1813m/z	276.181	3.87687	pos	Hydroxyhexanoycarnitine	LMFA07070072	Lipids and lipid-like molecules	Fatty Acyls	Fatty acid esters	*		41.7	22	M+H	C13H25NO5	2.69807	6607.07	6268.76	6269.09	9982.02	6895.31	1352.37	1699.54	1233.76	1345.9	1523.46	3731.48	3949.87	1869.26	6542.97	4781.66	2305.71
4.21_301.1201m/z	301.12	4.2102	pos	Homosalate	HMDB0253209	Unclassified	Unclassified	Unclassified			41.7	15.6	M+K	C16H22O3	0.181234	4293.04	3795.3	3600.99	3383.14	3409.7	0.0581718	301.594	5.88962e-06	5.88962e-06	5.88962e-06	4605.43	2476.66	50.5727	435.981	5.88962e-06	4354.38
4.41_318.2032m/z	318.203	4.40927	pos	Glycopyrrolate	3132	Benzenoids	Benzene and substituted derivatives	Unclassified			41.7	27	M+H	C19H27NO3	-9.8794	294.747	328.457	440.199	294.284	375.869	355.66	974.343	296.058	153.967	474.244	1274.41	1074.52	1163.7	798.316	5773.71	904.336
5.77_215.1524n	238.142	5.76785	pos	N-Nonanoylglycine	HMDB0013279	Organic acids and derivatives	Carboxylic acids and derivatives	Amino acids, peptides, and analogues	*		41.7	12.7	M+H-H2O, M+Na, M+H	C11H21NO3	1.07326	15802.7	17917.7	17683.4	17962	21759.4	15150.3	13506.6	14210	16460.3	12950.8	14532.9	14571.4	15300.6	18130.5	9591.61	16077.9
8.63_158.1541m/z	158.154	8.63237	pos	(3Z,6Z)-3,6-Nonadien-1-ol	HMDB0030957	Lipids and lipid-like molecules	Fatty Acyls	Fatty alcohols	*		41.7	11.5	M+NH4	C9H16O	1.2281	57100.6	51623.4	53927.2	57023	58743.1	57241.2	45974	54371.4	54248.8	53578.4	49894.2	50032	46173.6	55679.7	39723.7	55742.9
9.52_213.1496m/z	213.15	9.52242	neg	2-Methylisoborneol	LMPR0102090066	Lipids and lipid-like molecules	Prenol lipids	Monoterpenoids	*		41.7	11.1	M+FA-H	C11H20O	0.0333412	4062.03	4150.3	4051.09	4213.98	4950.46	326.993	425.681	423.567	443.974	499.967	593.511	800.361	256.845	913.321	589.176	606.16
0.91_405.2098m/z	405.21	0.911433	pos	7α-(Thiomethyl)spironolactone sulfoxide	2484	Unclassified	Unclassified	Unclassified			41.6	24.5	M+H	C23H32O4S	1.03808	33375.5	36569.2	36295.8	33551.2	40364.6	1.5056	60499.5	13557.3	2620.76	17908.6	38318.7	50424.2	47690.1	56976.6	37876.2	43599.3
1.58_270.0856n	293.075	1.58095	pos	Clitidine	73464	Unclassified	Unclassified	Unclassified			41.6	13.1	M+Na, M+K, M+H	C11H14N2O6	1.54488	1880.93	1757.39	1927.09	2327.94	3008.27	3046.41	11067.6	104428	11061.7	50127.1	9711.8	9573.64	29191.4	23243	7499.1	7032.1
14.23_109.0042m/z	109.004	14.2252	neg	Barbituric acid	HMDB0041833	Organoheterocyclic compounds	Diazines	Pyrimidines and pyrimidine derivatives	**	C00813	41.6	12.3	M-H2O-H	C4H4N2O3	-0.926541	80003.3	85122.3	79701.6	83736.2	83504.6	93498.8	78576.9	87175.4	98267.9	81460.5	73795.4	82171.9	88278.4	90008.4	88703.6	88959.6
3.39_223.1082m/z	223.108	3.39045	pos	Glycyl-Phenylalanine	85758	Organic acids and derivatives	Carboxylic acids and derivatives	Amino acids, peptides, and analogues	*		41.6	16	M+H	C11H14N2O3	1.958	5433.49	4996.76	5321.28	6063.3	6314.06	2190.5	6711.01	1393.13	2115.75	1607.52	35504.8	21632.5	8396.16	9454.3	11913.3	12738
4.34_144.1030m/z	144.103	4.34083	neg	Cyclohexylamine	HMDB0031404	Organic nitrogen compounds	Organonitrogen compounds	Cyclohexylamines	*	C00571	41.6	9.09	M+FA-H	C6H13N	-0.192401	671.37	707.065	749.801	1067.9	763.363	5.88962e-06	59.0053	5.88962e-06	5.88962e-06	5.88962e-06	168.719	74.8642	5.88962e-06	36.0526	25.7707	33.4505
4.63_243.1344m/z	243.134	4.62877	pos	Leucyl-Glutamate	HMDB0028928	Organic acids and derivatives	Carboxylic acids and derivatives	Amino acids, peptides, and analogues	*		41.6	15.4	M+H-H2O	C11H20N2O5	1.74058	936.852	834.801	840.957	1100.62	1027.32	731.012	2911.48	1427.82	540.125	1647.56	1614.53	2808.91	2060.46	1557.52	1438.29	2567.79
5.95_179.0584n	180.066	5.95157	pos	N-Acetylanthranilate	66371	Benzenoids	Benzene and substituted derivatives	Benzoic acids and derivatives	*	C06332	41.6	13.9	M+H-H2O, M+H	C9H9NO3	1.08137	635.371	681.559	740.317	873.928	949.592	5356.99	1984.87	3584.67	6629.24	2984.47	1223.79	1227.66	2246.38	3807.66	1164.07	1092.28
9.32_172.1697m/z	172.17	9.32047	pos	(-)-Carvomenthone	HMDB0034969	Lipids and lipid-like molecules	Prenol lipids	Monoterpenoids	*		41.6	19.6	M+NH4	C10H18O	0.777564	68878.7	70497.9	75837	76457.1	86991.4	23317.2	21908.4	22382.6	31372	16276.4	27796.8	26445.3	18286.5	32825.7	22832.1	32670
1.38_226.1553m/z	226.155	1.38387	pos	Aminocarb	HMDB0248310	Unclassified	Unclassified	Unclassified			41.5	21.2	M+NH4	C11H16N2O2	1.22093	1327.07	932.689	1153.65	1224.74	1193.47	36.264	807.493	112.024	91.8006	224.68	1007.52	1354.48	1214.22	572.359	1873.68	881.35
10.27_314.2460n	337.235	10.2743	pos	10-Hydroxy-9-ketooctadecanoic acid	LMFA01050538	Lipids and lipid-like molecules	Fatty Acyls	Fatty Acids and Conjugates			41.5	11.7	M+Na, M+K, M+NH4, M+H-H2O	C18H34O4	0.982689	14268.7	13103.8	14235.4	13579.3	14598.7	26544.7	98392.6	66613.1	24339.3	410214	37518.1	22391.8	66904.6	78348.1	36667.7	188055
10.61_200.2011m/z	200.201	10.6137	pos	Cyclododecanone	HMDB0031341	Organic oxygen compounds	Organooxygen compounds	Carbonyl compounds	*		41.5	10.7	M+NH4	C12H22O	1.34208	152336	158677	140064	165580	168277	188008	163639	176339	229774	150549	160426	160650	144865	188422	107829	179573
10.87_326.2461n	349.235	10.8721	pos	AVOCADYNE ACETATE	43513	Unclassified	Unclassified	Unclassified			41.5	11.7	M+H-H2O, M+H, M+Na, M+K	C19H34O4	1.15583	25543.9	27624.6	25328.9	25865.4	30584.6	3452.89	3233.58	3089.64	5658.24	3802.18	2829.6	2905.39	3191.84	3792.63	29227.7	3682.67
10.89_608.3182m/z	608.318	10.8882	neg	OOB-PE	LMGP20020034	Lipids and lipid-like molecules	Glycerophospholipids	Oxidized glycerophospholipids			41.5	14.9	M+FA-H	C27H50NO9P	-4.08591	182220	197437	167875	189270	154024	172082	122214	109815	61657.3	121833	81558.2	129883	94252.2	81055.7	89954.8	108411
4.19_246.1374n	269.127	4.18713	pos	Hypaphorine	67522	Unclassified	Unclassified	Unclassified			41.5	12	M+H, M+K, M+Na	C14H18N2O2	2.35493	561.308	316.481	313.021	491.876	510.377	347797	27503.9	93428.3	160621	66683	63428.8	12010.5	100011	198663	2027.59	18125.8
8.50_271.0943m/z	271.094	8.50357	pos	(+)-cis-5,6-Dihydro-5-hydroxy-4-methoxy-6-(2-phenylethyl)-2H-pyran-2-one	HMDB0029575	Phenylpropanoids and polyketides	Kavalactones	Unclassified	*		41.5	10.9	M+Na	C14H16O4	0.908732	13439.4	12898.5	13277.6	13448.9	13511.5	11482.1	10728.8	11889.4	13425.6	12886.1	12779.6	11141.5	9488.27	12467.9	8436.2	12655.5
8.74_317.2934n	318.301	8.7433	pos	4-hydroxysphinganine	HMDB0304183	Lipids and lipid-like molecules	Sphingolipids	Sphingoid bases	**	C12144	41.5	12.5	M+H, M+Na	C18H39NO3	1.20432	5533.98	5399.36	4950.67	4932.63	5727.1	13673.6	35454.2	50759.7	31677.6	23510.4	52162.5	148395	61658.3	39557.7	188330	94094.4
9.86_440.3376m/z	440.338	9.86303	pos	O-(17-carboxyheptadecanoyl)carnitine	LMFA07070085	Lipids and lipid-like molecules	Fatty Acyls	Fatty esters			41.5	13.4	M+H-H2O	C25H47NO6	1.24558	1111.76	1199.95	981.327	1116.15	1303.22	425.873	3749.58	968.517	96.7859	1848.15	19734.8	15523.6	481.002	2146.95	798.302	4494.7
0.79_386.1229n	385.116	0.78745	neg	1-O-Sinapoylglucose	HMDB0041175	Phenylpropanoids and polyketides	Cinnamic acids and derivatives	Hydroxycinnamic acids and derivatives			41.4	17.7	M-H2O-H, M-H	C17H22O10	4.08265	115273	117655	117526	116855	117907	43268.5	8370.68	46897.8	7482.66	29775.1	3760.57	9504.21	17802.6	13135.3	16928	5422.9
0.81_323.0789m/z	323.079	0.805983	neg	1-O-Caffeoylglucose	HMDB0036937	Organooxygen compounds	Carbohydrates and carbohydrate conjugates	Monosaccharides		C10433	41.4	22.3	M-H2O-H	C15H18O9	4.92694	16327	13575.8	14110.5	16618.6	21074.1	18656	28123.1	15666.8	2114.27	41470.6	22094.8	28815.5	19874.6	29945.8	9570.25	12616.6
0.91_146.0272m/z	146.027	0.911433	pos	Acetylcysteine	HMDB0001890	Organic acids and derivatives	Carboxylic acids and derivatives	Amino acids, peptides, and analogues	*	C06809	41.4	19.3	M+H-H2O	C5H9NO3S	1.00642	4291.05	4325.51	4282.49	4902.21	5319.34	991.059	12021.8	1933.73	938.211	2436.58	15487.2	6119.43	2272.73	2257.6	771.135	4653.47
1.19_215.0165m/z	215.017	1.1916	pos	Isocitric acid	HMDB0000193	Organic acids and derivatives	Carboxylic acids and derivatives	Tricarboxylic acids and derivatives	**	C00311	41.4	10.9	M+Na	C6H8O7	1.64398	66726.1	57928.7	56265.1	65363.8	70418.7	1905.41	2222.13	17869	817.882	5949.23	1382.73	1173.15	8815.7	2231.62	22174.3	1139.5
1.82_350.1023m/z	350.102	1.82372	pos	S-(Formylmethyl)glutathione	70375	Organic acids and derivatives	Carboxylic acids and derivatives	Amino acids, peptides, and analogues	**	C14871	41.4	22.6	M+H	C12H19N3O7S	1.93559	4727.88	6132.85	6385.01	6557.47	6666.03	7106.17	509.539	114.282	1839.31	592.047	613.348	1321.16	284.27	3622.5	54.8908	2355.01
11.57_251.2371m/z	251.237	11.5687	pos	9S,10R-Epoxy-3Z,6Z-octadecadiene	98277	Lipids and lipid-like molecules	Fatty Acyls	Oxygenated hydrocarbons			41.4	11	M+H	C17H30O	0.75103	4599.04	4257.37	4456.28	4680.66	3823.33	92.6245	108.562	111.689	277.963	180.278	316.82	5.88962e-06	67.8268	179.737	46.4795	115.137
14.79_256.2637m/z	256.264	14.7937	pos	3-Methylcyclopentadecanone	HMDB0034181	Organic oxygen compounds	Organooxygen compounds	Carbonyl compounds			41.4	10.4	M+NH4	C16H30O	0.884224	700494	728813	738198	789757	802506	767745	703481	813771	821709	799171	763347	710188	608019	780091	542259	786583
2.09_305.0862m/z	305.086	2.09202	pos	1-Methylinosine	HMDB0002721	Nucleosides, nucleotides, and analogues	Purine nucleosides	Unclassified	*		41.4	15.1	M+Na	C11H14N4O5	2.01497	5999.12	6716.78	6035.99	7598.37	6458.21	1627.63	1610.67	1963.11	1704.88	2312.76	2407.02	2139.48	1315.08	1460.1	827.8	2146.01
4.54_129.0557m/z	129.056	4.53907	neg	2,3-Dihydro-4-methylfuran	HMDB0040584	Organoheterocyclic compounds	Dihydrofurans	Unclassified			41.4	7.84	M+FA-H	C5H8O	0.134954	7168.38	7472.63	7501.19	8167.95	8467.28	18335	4952.84	12587.5	7235.08	8391.58	4661.93	4591.7	5574.72	6713.95	6013.14	4669.1
4.86_208.0615m/z	208.061	4.85975	neg	3-Carbamoyl-2-phenylpropionic acid	HMDB0060367	Benzenoids	Benzene and substituted derivatives	Unclassified	**	C16591	41.4	9.88	M-H	C10H11NO4	-0.165778	868.043	891.766	799.297	999.782	988.109	15786.9	6231.16	13353.6	35360.4	7084.06	3785.15	3954.25	9197.5	10824.9	4212.24	3110.12
5.04_217.1913m/z	217.191	5.04318	pos	11-nitro-1-undecene	HMDB0062669	Organic 1,3-dipolar compounds	Allyl-type 1,3-dipolar organic compounds	Organic nitro compounds			41.4	10.9	M+NH4	C11H21NO2	1.19853	32879.8	27421.3	27624.7	35133	37477.5	28581.9	21632.7	27043.3	28102	25359.9	23681.8	26288.7	20334.4	29543.3	13417	31776.9
7.18_466.1978m/z	466.198	7.17537	pos	Biotripyrrin-b	HMDB0003324	Organoheterocyclic compounds	Pyrroles	Substituted pyrroles	*		41.4	12.9	M+H	C25H27N3O6	1.26389	3412.36	3284.74	3263.39	2938.97	3408.08	1102.24	7524.9	5.88962e-06	617.573	5.88962e-06	18494.1	11944.3	136.306	7342.71	1978.05	10910.5
8.31_187.1339m/z	187.134	8.31248	neg	9-Hydroxydecanoic acid	HMDB0033201	Organic acids and derivatives	Hydroxy acids and derivatives	Medium-chain hydroxy acids and derivatives			41.4	10.5	M-H	C10H20O3	-0.300887	2819.53	2433.07	2676.06	3013.77	3165.29	836.479	1891.14	1419.33	1101.99	1471.16	2450.34	3596.45	654.318	2308.05	1823.63	2542.05
8.92_225.1487m/z	225.149	8.92153	pos	Furfuryl octanoate	LMFA07010891	Lipids and lipid-like molecules	Fatty Acyls	Fatty acid esters	*		41.4	10.1	M+H	C13H20O3	0.967828	15967	16188.6	15628.1	16740.2	17095.5	14170.1	14418.9	14452.2	16106.6	13719.4	14902.7	15477.5	12363.5	16368.8	11103.3	17566.7
9.55_208.1466n	209.154	9.54772	pos	4-Heptyloxyphenol	HMDB0246434	Unclassified	Unclassified	Unclassified			41.4	14	M+H, M+Na	C13H20O2	1.30063	15302.5	15013.6	15258.6	16143.7	15931.2	19414.1	18155.8	20256.4	19898.7	20392.8	18444.6	17300.4	17540.6	19362.1	13329.4	23758.9
0.83_425.1771m/z	425.177	0.829667	pos	N,N'-diacetylchitobiose	HMDB0062702	Organic oxygen compounds	Organooxygen compounds	Carbohydrates and carbohydrate conjugates	**	C01674	41.3	13.2	M+H	C16H28N2O11	1.13917	11391.1	9676.81	10581.2	10566.8	11683.9	5.88962e-06	5117.05	399.637	5.88962e-06	475.649	14812.8	8039.02	1651.35	723.632	339.213	1444.99
1.15_156.0633m/z	156.063	1.14785	pos	L-2-Amino-5-hydroxypentanoic acid	HMDB0031658	Organic acids and derivatives	Carboxylic acids and derivatives	Amino acids, peptides, and analogues	*		41.3	11.7	M+Na	C5H11NO3	1.2156	1981.94	2005.43	2248.36	2023.41	1979.03	2393.66	1494.89	2479.6	2443.85	2189.9	1408.4	1406.92	1557.36	2437.61	1365.17	2735.56
1.27_356.1213m/z	356.121	1.26567	neg	1,7-Dimethylguanosine	HMDB0001961	Nucleosides, nucleotides, and analogues	Purine nucleosides	Unclassified	*		41.3	10.1	M+FA-H	C12H17N5O5	0.256387	39420.9	42044.6	38554.9	41516.8	42359	55.2653	4157.83	609.074	580.263	6798.39	4432.4	5137.55	4339.53	4274.12	8168.28	8202.34
10.16_181.1589m/z	181.159	10.1644	pos	7-lauroleic acid	LMFA01030040	Lipids and lipid-like molecules	Fatty Acyls	Fatty Acids and Conjugates			41.3	10.4	M+H-H2O	C12H22O2	0.943072	5700.81	5625.35	6112.94	6047.5	5834.67	5964.79	5616.14	6564.47	6631.61	5644.65	6025.33	5730.92	4881.49	6823.03	4540.48	6035.23
11.19_269.2094m/z	269.209	11.1941	pos	(1S,2S)-3-oxo-2-pentyl-cyclopentanehexanoic acid	74960	Lipids and lipid-like molecules	Fatty Acyls	Octadecanoids			41.3	21.1	M+H	C16H28O3	-6.51031	8494.1	8565.14	8269.93	7984.77	7807.68	9218.08	8484.59	8198.54	9924.13	15227.4	5997.39	5807.65	5032.25	7748.98	4564.16	8384.15
12.91_374.3033m/z	374.303	12.9124	pos	Anandamide (20:2, n-6)	LMFA08040002	Lipids and lipid-like molecules	Fatty Acyls	Fatty amides			41.3	12.7	M+Na	C22H41NO2	1.09499	31174.4	32381.6	39563.9	39227	36232.3	4764.47	2783.95	3173.76	3443.91	5953.12	5695.33	4631.46	5286.02	5401.08	2985.66	6334.55
13.36_325.1841m/z	325.184	13.3584	neg	2-Dodecylbenzenesulfonic acid	HMDB0031031	Benzenoids	Benzene and substituted derivatives	Benzenesulfonic acids and derivatives	*		41.3	12.4	M-H	C18H30O3S	-0.596328	1.04046e+06	1.01894e+06	1.00452e+06	1.02142e+06	1.02081e+06	1.48224e+06	1.28697e+06	1.45795e+06	1.59925e+06	1.32618e+06	1.14808e+06	1.10755e+06	1.20341e+06	1.43109e+06	1.27089e+06	1.29273e+06
4.37_144.1022m/z	144.102	4.37402	pos	4-heptynoic acid	LMFA01030489	Lipids and lipid-like molecules	Fatty Acyls	Fatty Acids and Conjugates			41.3	13.5	M+NH4	C7H10O2	2.18399	1992.85	1923.29	1985.01	1949.63	2088.93	700.741	1184.18	730.427	563.356	839.112	1682.21	1793.7	419.762	1227.03	446.954	1088.09
4.40_126.0019m/z	126.002	4.39737	neg	Penem	HMDB0256222	Alkaloids and derivatives	Camptothecins	Unclassified			41.3	17.3	M-H	C5H5NOS	-0.415638	548.401	941.318	761.963	832.277	743.868	228.317	2792.78	725.463	288.594	750.321	758.787	1078.37	3298.44	1106.42	1062.05	557.279
4.85_308.0916m/z	308.092	4.85368	pos	Aristolodione	HMDB0033247	Benzenoids	Phenols	Benzenediols			41.3	16	M+H	C18H13NO4	-0.360491	13829.5	13476.4	14826.9	13643.4	15870	6607.83	2231.69	295.564	7483.79	744.022	3367.82	4948.62	579.317	8743.88	58.021	6436.61
5.38_109.1016m/z	109.102	5.38145	pos	4-Vinylcyclohexene	73021	Unclassified	Unclassified	Unclassified			41.3	13.9	M+H	C8H12	3.94179	4623.4	4349.99	4810.21	5360.3	5822.98	4769.67	4158.53	4607.58	4602.94	4641.21	5030.29	4364.19	3804.21	5259.81	2165.93	5385.11
5.80_387.2398m/z	387.24	5.79937	neg	13-Hydroxy-9-methoxy-10-oxo-11-octadecenoic acid	HMDB0040901	Lipids and lipid-like molecules	Fatty Acyls	Lineolic acids and derivatives	*		41.3	18.2	M+FA-H	C19H34O5	2.88307	909.779	1057.59	960.945	890.413	1076.92	1923.19	6836.73	1631.66	2672.05	4417.49	1060.31	1014.49	28595.8	2970.37	2831.36	493.446
6.73_179.1077m/z	179.108	6.72725	neg	p-Mentha-1,3,8-triene	HMDB0037013	Lipids and lipid-like molecules	Prenol lipids	Monoterpenoids	*		41.3	7.56	M+FA-H	C10H14	-0.240501	255.369	309.103	286.305	293.803	295.351	206.222	1032.26	625.507	113.808	2418.15	138.174	450.241	8136.3	440.465	1461.09	5.88962e-06
7.11_202.2167m/z	202.217	7.10507	pos	5E-Dodecen-1-ol	LMFA05000146	Lipids and lipid-like molecules	Fatty Acyls	Fatty alcohols			41.3	9.96	M+NH4	C12H24O	1.0649	3008.08	3000	3149.03	3046.24	2986.55	2932.04	1752.09	2650.35	3868.07	3373.64	2132.3	2878.91	1545.98	3116.65	2912.17	6138.84
9.96_194.0822m/z	194.082	9.96232	neg	Venoterpine	HMDB0030175	Organoheterocyclic compounds	Pyridines and derivatives	Unclassified	*		41.3	9.07	M+FA-H	C9H11NO	-0.693884	10353.3	11275.1	11188	12359.5	10944.2	13549.4	10733.7	12771.7	14822.7	11971.4	11633.8	11445.3	12270	12694.5	11916.2	13297.2
0.85_244.0796m/z	244.08	0.84955	pos	N-Acetylmannosamine	HMDB0001129	Organic oxygen compounds	Organooxygen compounds	Carbohydrates and carbohydrate conjugates	**	C00645	41.2	20.1	M+Na	C8H15NO6	1.94218	28722.7	32028.6	26298.2	28980	32557.5	18957	25589.6	23263.2	19456.4	27033.2	30909.7	48442.1	16670	24685	19996.2	24876.1
1.34_260.1611m/z	260.161	1.34122	pos	Hydroxyprolyl-Lysine	HMDB0028868	Organic acids and derivatives	Carboxylic acids and derivatives	Amino acids, peptides, and analogues	*		41.2	13.4	M+H	C11H21N3O4	2.47732	1090.58	1112.13	1167.34	1081.55	1141.05	306.757	752.844	150.136	542.548	301.393	3306.36	1685.51	1575.78	1454.85	3290.29	1462.25
1.41_382.0743m/z	382.074	1.40547	pos	Triglochinin	HMDB0030934	Organic oxygen compounds	Organooxygen compounds	Carbohydrates and carbohydrate conjugates			41.2	13.6	M+Na	C14H17NO10	-0.406269	5402.76	5744.68	6283.89	6259.66	6543.48	74.338	24670.5	1046.5	90.778	876.289	26983.2	9197.18	2708.4	3947.72	969.805	6447.37
1.94_310.1767m/z	310.177	1.93878	pos	Lysyltyrosine	HMDB0028963	Organic acids and derivatives	Carboxylic acids and derivatives	Amino acids, peptides, and analogues	*		41.2	12.5	M+H	C15H23N3O4	1.84546	37216.6	37054.3	36688.7	38576	39065.1	2736.92	36095.8	5842.95	1990.62	15280.4	45104.8	42962.1	22453.2	33356.2	23703.3	13060.7
11.15_297.2433m/z	297.243	11.1467	neg	2,6,8,12-Tetramethyl-2,4-tridecadien-1-ol	LMFA05000170	Lipids and lipid-like molecules	Fatty Acyls	Fatty alcohols			41.2	10.1	M+FA-H	C17H32O	-0.778094	37458.8	36971.1	35865.7	38221.7	39819.6	8691.91	6895.36	10515.6	12292.1	12902.1	13302.9	8580.39	10574.5	21949.9	11733.8	9727.01
11.48_605.3699n	606.377	11.4828	pos	OOB-PC	LMGP20010025	Lipids and lipid-like molecules	Glycerophospholipids	Oxidized glycerophospholipids			41.2	17.1	M+H, M+Na	C30H56NO9P	1.10001	108440	112475	131182	112868	117327	953.362	149.042	5.88962e-06	157.734	342.619	146.124	403.96	508.901	356.317	16795.9	2206.51
13.82_174.1279m/z	174.128	13.8153	pos	N-Desmethylselegiline	2402	Unclassified	Unclassified	Unclassified			41.2	9.73	M+H	C12H15N	1.16281	157845	157608	170818	164497	168638	168467	144566	162748	175754	167932	162083	150708	133455	168376	107558	159632
2.47_249.0314n	497.063	2.47267	neg	Norepinephrine sulfate	HMDB0002062	Organic acids and derivatives	Organic sulfuric acids and derivatives	Arylsulfates	*		41.2	18.2	M+FA-H, 2M-H	C8H11NO6S	2.86277	5771.07	5819.01	4805.46	5191.12	6807.52	1158.94	10635.8	1873.49	1370.9	4871.37	9066.45	9878.66	13928.4	5177.64	9695.78	4449.29
2.51_120.0580n	121.065	2.50945	pos	Lentialexin	HMDB0038997	Lipids and lipid-like molecules	Fatty Acyls	Fatty alcohols	*		41.2	13.2	M+H-H2O, M+H	C8H8O	4.33237	32800.9	30975.7	29209.2	36437.2	37111.9	23267.9	23412.4	23237.4	24257.5	25657.8	28063.4	30052.8	28117.9	31969.3	22982.3	32304.2
2.53_262.0843m/z	262.084	2.53077	pos	2,3-bis (4-Hydroxyphenyl) Propionitrile	45149	Unclassified	Unclassified	Unclassified			41.2	14	M+Na	C15H13NO2	1.90598	3542.28	3753.79	3113.68	3490.44	3690.64	84.429	244.996	64.5654	387.567	65.429	319.64	600.655	5.88962e-06	309.613	315.161	844.079
3.77_584.2823n	585.29	3.77167	pos	Ouabain	1670	Benzenoids	Benzene and substituted derivatives	Diphenylmethanes	**	C01443	41.2	19.1	M+H, M+Na	C29H44O12	-1.62345	1727.17	1957.8	1569.27	2482.42	2340.23	578.616	55921.1	19639.4	1143.38	6722.16	12433.5	24772.8	48694.3	10564.4	101677	9124.89
8.01_227.1255m/z	227.126	8.01232	pos	(2xi,6xi)-7-Methyl-3-methylene-1,2,6,7-octanetetrol	HMDB0033217	Lipids and lipid-like molecules	Fatty Acyls	Fatty alcohols	*		41.2	8.55	M+Na	C10H20O4	0.702098	29683.3	31138.9	30579.5	31445.7	30795.2	29039.6	27018.1	29330.2	29719.1	30984.2	29431.7	25600.3	24618.6	29993.8	20568.4	31812
8.45_193.0869m/z	193.087	8.4489	neg	4-Phenyl-3-buten-2-ol	HMDB0031616	Phenylpropanoids and polyketides	Cinnamyl alcohols	Unclassified	*		41.2	8.18	M+FA-H	C10H12O	-0.791321	61530.5	66915.1	65863	71275.3	74822.5	73496.4	67940.4	74605	86346	71462.4	63472.5	65938.1	68253.8	72420.1	76516.3	74254.6
1.58_399.1881m/z	399.188	1.58095	pos	Enalapril	HMDB0014722	Organic acids and derivatives	Carboxylic acids and derivatives	Amino acids, peptides, and analogues		C06977	41.1	17.6	M+Na	C20H28N2O5	-2.52483	237.461	271.58	231.66	288.323	334.42	2185.77	4161.43	5694	705.402	4071.41	461.226	642.505	7823.02	2092.43	2704.95	220.902
11.58_295.2277m/z	295.228	11.5811	neg	9R,10S-EpOME	43441	Lipids and lipid-like molecules	Fatty Acyls	Octadecanoids	**	C14825	41.1	9.45	M-H	C18H32O3	-0.630423	123345	133956	129087	133085	140517	7328.79	8247.23	8026.28	7166.85	8545.74	11841.5	11197.5	6630.87	9987.44	9775.03	8336.22
2.35_242.0903n	287.088	2.3485	neg	L-Thymidine	HMDB0253921	Nucleosides, nucleotides, and analogues	Pyrimidine nucleosides	Pyrimidine 2'-deoxyribonucleosides			41.1	6.56	M-H, M+FA-H	C10H14N2O5	0.245225	109136	105069	106072	110088	119643	5.88962e-06	282.635	16.8681	5.88962e-06	203.786	378.702	297.134	90.3963	72.0722	41.1327	1180.06
3.50_336.1561m/z	336.156	3.49665	pos	Dinor-7-NO2-CLA	LMFA01120007	Lipids and lipid-like molecules	Fatty Acyls	Fatty Acids and Conjugates			41.1	12.7	M+K	C16H27NO4	-3.44566	16555.9	18662.8	16580.8	20565.1	19018.7	630.005	3327.06	481.42	1132.43	2998.3	7857.61	8533.35	2021.96	3234.09	1681.85	2813.79
4.35_195.0882m/z	195.088	4.35187	pos	Caffeine	1455	Organoheterocyclic compounds	Imidazopyrimidines	Purines and purine derivatives	**	C07481	41.1	19	M+H	C8H10N4O2	2.89623	711.984	895.053	877.76	836.7	900.392	1639.27	1960.28	1692.28	1041.9	938.064	3113.19	1736.21	3198.52	1293.88	1756.59	1268.5
4.48_471.2599m/z	471.26	4.48063	pos	N-Arachidonoyl Glutamine	HMDB0241994	Lipids and lipid-like molecules	Fatty Acyls	Fatty amides			41.1	15.3	M+K	C25H40N2O4	-4.69692	484.276	459.084	606.239	451.722	362.656	5.88962e-06	831.885	415.272	525.879	245.214	445.66	1038.91	2252.01	167.733	5987.79	3062.24
4.97_158.1178m/z	158.118	4.96908	pos	Tranexamic acid	2893	Organic acids and derivatives	Carboxylic acids and derivatives	Amino acids, peptides, and analogues		C12535	41.1	13.5	M+H	C8H15NO2	1.43576	5579.29	5440.68	5893.54	5374	6244.03	2112.52	3435.09	1978.35	2004.97	2120.35	4796.04	3430.6	1906.26	2786.21	1503.45	3250.38
0.89_633.1268m/z	633.127	0.889467	neg	Petunidin	HMDB0003173	Phenylpropanoids and polyketides	Flavonoids	O-methylated flavonoids	*	C08727	41	21	2M-H	C16H13O7+	2.93297	280840	249606	252976	262717	279132	347476	118222	123123	337972	163274	147585	166662	79314.7	294559	59885.8	170514
1.11_446.9647m/z	446.965	1.10818	neg	4-thiodimethylarsenobutanoic acid	LMFA00000041	Lipids and lipid-like molecules	Fatty Acyls	Other Fatty Acyls			41	14	2M-H	C6H13AsO2S	3.41	9300.46	8309.4	5917.18	6217.96	5742.78	14535.7	696.618	317.909	13282.8	72.7805	5.88962e-06	5.88962e-06	281.13	2528.51	5.88962e-06	28.3553
1.32_330.0604m/z	330.06	1.31848	pos	2'-Deoxyguanosine 5'-monophosphate	HMDB0001044	Nucleosides, nucleotides, and analogues	Purine nucleotides	Purine deoxyribonucleotides	**	C00362	41	16	M+H-H2O	C10H14N5O7P	1.8162	3748.73	3122.19	3513	3066.78	3589.32	5.88962e-06	1671.57	436.739	238.849	790.053	1918.99	1146.81	1257.6	1201.61	1078.56	1388.72
1.75_244.1661m/z	244.166	1.75082	pos	Pentobarbital	HMDB0014457	Organoheterocyclic compounds	Diazines	Pyrimidines and pyrimidine derivatives		C07422	41	13.8	M+NH4	C11H18N2O3	2.44585	2414.89	2231.24	2002.28	2563.28	2978.49	1199.69	2594.78	1959.21	1759.28	3208.66	2269.3	2248.7	4797.17	2466.83	6348.91	2412.78
10.98_221.1546m/z	221.155	10.978	neg	(6E,8E)-4,6,8-Megastigmatriene	HMDB0035180	Hydrocarbons	Unsaturated hydrocarbons	Branched unsaturated hydrocarbons	*		41	7.24	M+FA-H	C13H20	-0.648393	15476.8	14604.4	16840.7	15924.3	16561.3	17368.1	14812	12636.4	15138.5	11323	15586.3	15877.3	12881.7	16362.7	17787.9	16123.1
11.70_579.3908n	580.398	11.7011	pos	PC(18:0/3:0)	LMGP01010829	Lipids and lipid-like molecules	Glycerophospholipids	Glycerophosphocholines			41	12	M+H, M+Na	C29H58NO8P	1.29299	64049	62903.2	70043.4	72085.2	78847.9	383.303	5.88962e-06	310.183	41.5194	149.819	5.88962e-06	142.882	340.307	162.115	13577.9	1884.42
12.14_329.1599m/z	329.16	12.1358	pos	Nepetaside	HMDB0038149	Lipids and lipid-like molecules	Prenol lipids	Terpene glycosides	*		41	12.8	M+H-H2O	C16H26O8	1.15579	1230.62	992.453	973.672	1113.64	1506.4	6159.08	1722.44	2360.53	1580.42	1970.83	2169.76	2432.04	3215.18	2973.49	1229.81	2560.45
2.24_169.0612m/z	169.061	2.24033	pos	Pyroglutamylglycine	HMDB0061890	Organic acids and derivatives	Carboxylic acids and derivatives	Amino acids, peptides, and analogues			41	13.9	M+H-H2O	C7H10N2O4	2.26892	499.107	490.933	572.496	704.049	645.027	1190.72	513.032	3001.54	953.642	1983.96	579.944	345.4	1353.15	705.329	730.697	1015.59
2.36_275.0650m/z	275.065	2.35933	neg	Flutamide	HMDB0014642	Benzenoids	Benzene and substituted derivatives	Trifluoromethylbenzenes	**	C07653	41	8.84	M-H	C11H11F3N2O3	0.37691	5529.65	5748.94	5682.03	5552.39	6063.37	387.316	4381.1	10256.2	584.913	10737.4	4717.14	7128.24	6610.11	17108.3	2425.57	8396.17
5.02_304.2121m/z	304.212	5.02147	pos	3-hydroxyoctanoyl carnitine	HMDB0061634	Lipids and lipid-like molecules	Fatty Acyls	Fatty acid esters	*		41	11.8	M+H	C15H29NO5	0.738768	7435.41	6910.84	6297.66	6986.74	6670.69	242.777	2943.1	742.095	635.834	2185.1	7199.67	7118.23	435.241	5360.28	1575.9	3383.64
5.18_182.1906m/z	182.191	5.18485	pos	Dicyclohexylamine	70260	Unclassified	Unclassified	Unclassified			41	8.9	M+H	C12H23N	1.55941	9749.31	11225	11893.9	13230.7	12121.6	16502.6	18041.2	13010.7	14209.9	16311.9	18923.1	16438.4	12888.6	13258.9	5282.71	20987.4
6.44_228.1604m/z	228.16	6.43725	neg	N-Decanoylglycine	HMDB0013267	Organic acids and derivatives	Carboxylic acids and derivatives	Amino acids, peptides, and analogues	*		41	9.03	M-H	C12H23NO3	-0.530335	6982.93	6692.51	6327.82	6667.02	6928.41	8177.03	6962.45	6650.65	8475.99	8064.18	6919.1	6756.92	8974.25	9782.94	10076.1	7966.07
7.49_353.2308m/z	353.231	7.48553	pos	15(R),19(R)-hydroxy Prostaglandin E1	45601	Unclassified	Unclassified	Unclassified			41	14.8	M+H-H2O	C20H34O6	-3.85149	49703.3	48900.7	52078.6	51877.9	51420.3	7001.22	3648.8	4689.32	8786.78	15066.3	5663.18	4582.37	35240.4	13837.5	10639.5	4608.08
0.77_141.0193n	142.027	0.773167	pos	1-Hydroxy-2-aminoethylphosphonate	63604	Unclassified	Unclassified	Unclassified			40.9	8.26	M+H, M+Na, M+K	C2H8NO4P	1.38687	126694	143561	128400	133639	139750	6948.95	118754	42834.6	15651.1	81745.3	166345	116412	63444.5	122376	23689.4	156402
0.93_262.1289m/z	262.129	0.9306	pos	Methylmalonylcarnitine	LMFA07070081	Lipids and lipid-like molecules	Fatty Acyls	Fatty acid esters	*		40.9	12.5	M+H	C11H19NO6	1.47861	7903.57	5935.68	6659.44	6864.03	8082.59	17922.6	3326.65	7034.24	11874.4	7609.02	2232.65	2085.92	2819.08	10517.1	2081.28	2127.03
1.02_176.0557m/z	176.056	1.01717	pos	2-amino-3-oxo-hexanedioic acid	35946	Organic acids and derivatives	Carboxylic acids and derivatives	Amino acids, peptides, and analogues		C05520	40.9	21.3	M+H	C6H9NO5	1.92736	2582.34	2588.79	2827.41	2482.59	2424.26	847.833	4260.76	1801.94	1189.3	3189.18	7006.65	3319	1746.64	2616.61	1878.54	3558.27
1.42_446.1954n	491.194	1.42188	neg	Cubebininolide	HMDB0032728	Lignans, neolignans and related compounds	Furanoid lignans	Tetrahydrofuran lignans			40.9	12.8	M-H, M+FA-H	C24H30O8	2.91332	12750.5	11603	12312.9	13910.7	10947.4	5.88962e-06	9179.78	1962.77	5.88962e-06	1036.37	9120.12	13129.2	17510.7	4265.61	11818.5	3916.08
2.17_166.0727m/z	166.073	2.17173	pos	7-Methylguanine	58012	Organoheterocyclic compounds	Imidazopyrimidines	Purines and purine derivatives	*	C02242	40.9	15.3	M+H	C6H7N5O	2.16671	2041.05	1945.01	2361.18	2277.32	2312.91	27.8138	779.669	186.199	62.3883	361.325	861.947	1487.35	458.151	624.926	441.988	766.519
2.36_120.0448m/z	120.045	2.36175	pos	1,2-Diacylglycerol-LD-PI-pool	HMDB0062270	Benzenoids	Benzene and substituted derivatives	Unclassified			40.9	11.9	M+H	C7H5NO	3.10165	896.154	884.935	923.094	1023.61	1022.91	308.526	727.466	1182.97	330.311	1540.48	685.363	958.306	730.741	2360.41	308.327	1217.83
2.36_145.0530n	146.06	2.36175	pos	3-Methyleneoxindole	65836	Unclassified	Unclassified	Unclassified			40.9	11	M+H, M+NH4	C9H7NO	1.71033	3708.5	3540.52	4248.74	4138.24	4304	1146.52	3454.33	5609.51	1234.75	7193.21	3014.52	4093.99	3194.81	11071.5	1352.8	6337.7
3.31_170.0816m/z	170.082	3.30527	pos	2-Keto-6-acetamidocaproate	HMDB0012150	Organic acids and derivatives	Keto acids and derivatives	Medium-chain keto acids and derivatives	**	C05548	40.9	12.9	M+H-H2O	C8H13NO4	2.22664	3863.42	3611.84	3842.36	4465.54	4765.96	1904.3	1200.77	1311.71	2913.7	1567.16	1328.53	1543.09	1830.45	3844.25	1198.52	1720.35
3.67_375.1965m/z	375.197	3.67325	pos	Paramethasone	HMDB0015462	Lipids and lipid-like molecules	Steroids and steroid derivatives	Hydroxysteroids		C07413	40.9	18.1	M+H-H2O	C22H29FO5	-0.25595	616.258	374.108	586.288	834.027	600.16	276.121	548.567	123.446	279.582	192.736	545.769	251.347	159.972	242.4	15411	3866.65
3.92_662.3336m/z	662.334	3.91993	pos	apicidin	HMDB0248512	Unclassified	Unclassified	Unclassified			40.9	24.7	M+K	C34H49N5O6	3.40576	3689.74	2313.6	3064.08	3296.56	2752.96	916.653	6061.07	1695.12	873.325	1935.42	3844.59	3831.84	5859.98	5812.11	13083.1	3597.62
1.20_128.0353m/z	128.035	1.19978	neg	O-Acetylserine	HMDB0003011	Organic acids and derivatives	Carboxylic acids and derivatives	Amino acids, peptides, and analogues	**	C00979	40.8	10.9	M-H2O-H	C5H9NO4	-0.351412	46982.6	48758.2	51058.5	48541.1	48760.3	33223.5	120370	77289.9	51277.2	94719.6	92876	62284.6	69530.4	45453	46566.7	37715.8
11.83_571.2887m/z	571.289	11.831	neg	LysoPI(16:0/0:0)	HMDB0061695	Lipids and lipid-like molecules	Glycerophospholipids	Glycerophosphoinositols	*		40.8	9.24	M-H	C25H49O12P	-0.25481	72279.7	75695.1	67606.4	68683	70921.8	12567.2	59379.2	28726.2	5085.45	36173.1	30440.1	44143.4	45054.7	28368.9	32677.7	11872.9
11.91_396.2880n	419.277	11.9135	pos	PGF2alpha isopropyl ester	LMFA03010076	Lipids and lipid-like molecules	Fatty Acyls	Eicosanoids			40.8	8.18	M+Na, M+K, M+NH4, M+H	C23H40O5	1.18855	6484.19	6273.77	6739.09	7864.51	7944	9102.68	10620.3	12079	7821.35	13549.8	7517.01	182813	17537.2	42229.1	783670	155220
12.37_363.3108m/z	363.311	12.3709	pos	9-Hexadecenoylcholine	HMDB0013208	Organic nitrogen compounds	Organonitrogen compounds	Quaternary ammonium salts	*		40.8	12.4	M+Na	C21H42NO2+	-0.0347874	6318.48	5001.11	5675.71	5802.5	6357.58	9640.55	6452.86	8695.79	9043.3	8595.55	7946.07	8888.66	7571.6	8479.26	11750.9	7249.98
15.11_399.3260m/z	399.326	15.1084	pos	(7E)-(3S,6R)-6-hydroperoxy-9,10-seco-4,7,10(19)-cholestatrien-3-ol	LMST03020252	Unclassified	Unclassified	Unclassified			40.8	8.83	M+H-H2O	C27H44O3	0.666264	17780.4	20422.9	16737.4	17289.4	18016.2	2529.94	947.677	1238.92	3833.27	5424.19	226.798	353.064	1154.37	1742.4	5.88962e-06	206.463
2.51_144.0810m/z	144.081	2.50945	pos	quinaldine	96204	Organoheterocyclic compounds	Quinolines and derivatives	Unclassified			40.8	12.6	M+H	C10H9N	1.65823	4425.87	4184.48	4423.21	5049.96	4881.9	2423.29	4249.53	2838.1	2902.8	3481.02	4857.93	5247.01	4729.75	3588.49	3184.63	3495.4
3.74_176.0744m/z	176.074	3.74438	pos	S-(4,5-Dihydro-2-methyl-3-furanyl) ethanethioate	HMDB0037786	Organoheterocyclic compounds	Dihydrofurans	Unclassified			40.8	12.3	M+NH4	C7H10O2S	2.74359	1302.36	1095.72	1272.18	1272.55	1201.84	21.148	2668.92	291.755	32.0623	20.932	2136.4	1110.57	315.105	304.917	133.506	966.935
8.24_158.1541m/z	158.154	8.24357	pos	(3E,6Z)-3,6-Nonadien-1-ol	LMFA05000555	Lipids and lipid-like molecules	Fatty Acyls	Fatty alcohols	*		40.8	7.58	M+NH4	C9H16O	1.10186	4363.57	3807.38	4249.9	4433.54	4464.56	3663.32	3453.05	3288.1	3329.85	3642.27	3370.39	3071.94	3029.92	3466.85	2589	3914.65
1.41_202.1077m/z	202.108	1.40547	pos	Genipic acid	HMDB0036072	Organoheterocyclic compounds	Dihydrofurans	Unclassified	*		40.7	13.3	M+NH4	C9H12O4	1.65094	501.256	532.967	728.21	661.354	544.778	958.704	3134.14	1243.82	1630.45	2636.06	1449.39	2689.47	2820.51	2682.65	1401.77	2768.27
1.57_137.0356m/z	137.036	1.57342	neg	Urocanic acid	298	Organoheterocyclic compounds	Azoles	Imidazoles	**	C00785	40.7	11.7	M-H	C6H6N2O2	-0.606048	781.819	845.313	939.028	1007.32	901.271	1043.58	2134.35	5940.7	1986.75	4167.47	1769.38	1929.01	3629.43	2742.5	2572.65	1763.02
10.44_423.3353n	424.343	10.4438	pos	Linoleyl carnitine	58418	Lipids and lipid-like molecules	Fatty Acyls	Fatty acid esters	*		40.7	10.1	M+H, M+Na	C25H45NO4	1.11948	1637.46	1448.11	1858.99	2182.44	1923.03	418861	36047.9	49039.7	98001.1	71354.5	149570	103772	17504.4	42707.7	13719	56523.2
3.92_227.1402m/z	227.14	3.92397	neg	N,N,N-Trimethyl-L-alanyl-L-proline betaine	HMDB0240365	Organic acids and derivatives	Carboxylic acids and derivatives	Amino acids, peptides, and analogues			40.7	9.23	M-H	C11H20N2O3	0.247877	1689.88	1768.11	1763.69	1785.45	1865.4	437.986	2784.63	1185.9	973.144	1042.68	3524.41	2623.14	9609.73	1961.44	6343.95	1134.35
5.06_351.2006m/z	351.201	5.06368	pos	methyl 9-(alpha-D-galactosyloxy)nonanoate	LMFA13010150	Lipids and lipid-like molecules	Fatty Acyls	Fatty acyl glycosides			40.7	18.3	M+H	C16H30O8	-2.2473	2354.68	1198.32	1587.92	2047.59	1466.64	1936.47	1458.9	2934.59	1858	2694.89	1816.5	3220.59	1429.48	2392.94	34144.3	2648.7
5.62_185.1150m/z	185.115	5.61858	pos	(3R,7R)-1,3,7-Octanetriol	HMDB0033625	Lipids and lipid-like molecules	Fatty Acyls	Fatty alcohols	*		40.7	6.42	M+Na	C8H18O3	1.18868	921645	919183	853421	918272	922115	990050	931662	878674	983622	1.00607e+06	874883	827894	747493	958681	421022	901510
7.24_180.1516n	198.185	7.244	pos	(3Z,6Z,9Z)-dodecatrienol	LMFA05000097	Lipids and lipid-like molecules	Fatty Acyls	Fatty alcohols		C08375	40.7	9.5	M+H, M+NH4, M+H-H2O	C12H20O	0.958055	5682.64	5701.31	4993	5699.23	5706.11	4763.68	4516.36	4584.17	4980.46	5216.7	5399.59	4842.54	4374.26	7012.56	4712.42	5356.75
7.57_469.1112m/z	469.111	7.57353	pos	3,6,7-Trihydroxy-4'-methoxyflavone 7-rhamnoside	HMDB0041455	Phenylpropanoids and polyketides	Flavonoids	Flavonoid glycosides			40.7	7.57	M+Na	C22H22O10	1.48187	92762.8	79974	81742.9	88797	90865.5	80162	69593.4	71155.5	76700.1	66596.4	79143.8	81983.9	70865.9	87194.5	59820.2	88869.8
1.34_322.1073m/z	322.107	1.34122	pos	S-Methyl GSH	69008	Unclassified	Unclassified	Unclassified			40.6	14.2	M+H	C11H19N3O6S	1.90762	4953.44	5173.84	4760.41	4758.51	4715.14	2209.21	643.298	450.392	2023.22	705.941	1622.21	1451.81	255.106	2246.18	332.372	3257.51
1.54_231.0193n	276.017	1.54307	neg	HPAA sulfate	HMDB0240381	Organic acids and derivatives	Organic sulfuric acids and derivatives	Arylsulfates			40.6	12.1	M-H, M+FA-H	C8H9NO5S	-3.5343	45127.2	41252.1	34614.2	32297.5	32921.1	18361.4	44883.6	21269.5	17033	25730.1	32655.9	38316.2	36648	40952	45110.9	25849.2
1.86_166.0727m/z	166.073	1.8562	pos	2,6-Diamino-4-hydroxy-5-N-methylformamidopyrimidine	HMDB0011657	Organoheterocyclic compounds	Diazines	Pyrimidines and pyrimidine derivatives	*	C04744	40.6	13.8	M+H-H2O	C6H9N5O2	2.05377	1412.7	1440.16	1607.92	1915.59	1615.95	45.6883	733.971	731.581	184.255	673.053	803.329	1290.25	481.664	770.747	375.84	1046.56
11.64_250.1447m/z	250.145	11.6439	neg	Tetranor-5-NO2-CLA	LMFA01120010	Lipids and lipid-like molecules	Fatty Acyls	Unclassified			40.6	7.54	M-H2O-H	C14H23NO4	-0.544986	273771	260053	262624	282379	308610	302631	235140	258280	285363	241321	219105	260849	258097	301079	292257	290137
12.80_352.1785m/z	352.178	12.796	pos	Pirenzepine	HMDB0014808	Organoheterocyclic compounds	Benzodiazepines	1,4-benzodiazepines		C07508	40.6	16.7	M+H	C19H21N5O2	4.82618	7737.31	6759.96	6349.41	6048.94	5944.59	1841.3	3276.11	2820.41	538.332	3962.1	6495.07	3333.11	2580.85	5102.06	2208.22	2795.07
3.78_470.1430m/z	470.143	3.7786	neg	Norfluoxetine glucuronide	HMDB0061170	Organic oxygen compounds	Organooxygen compounds	Carbohydrates and carbohydrate conjugates	*		40.6	6.89	M-H	C22H24F3NO7	-0.468569	19899.5	16190.8	22118.6	19031.2	18366.3	10.6431	220.92	379.183	5.88962e-06	147.471	294.437	1174.62	107.123	44.2471	63.219	75.3309
4.49_180.0661m/z	180.066	4.4937	pos	3 Hydroxycoumarin	HMDB0002149	Phenylpropanoids and polyketides	Coumarins and derivatives	Hydroxycoumarins	*		40.6	12.9	M+NH4	C9H6O3	3.41361	3049.28	2363.32	2546.78	2450.02	2432.14	872.61	251.263	787.689	442.163	1801.9	318.496	355.598	82.1032	415.919	334.127	282.776
5.62_142.1228m/z	142.123	5.61858	pos	3,5,5-Trimethyl-2-cyclopenten-1-one	HMDB0040246	Organic oxygen compounds	Organooxygen compounds	Carbonyl compounds			40.6	6.81	M+NH4	C8H12O	1.18475	5587.65	5599.63	5233.48	5920.18	5844.46	5605.37	5351.78	4999.75	5921.64	5910.57	5397.42	4908.35	4699.8	5899.44	2556.15	5669.85
5.89_207.1243m/z	207.124	5.89143	pos	(4-Hydroxybenzoyl)choline	HMDB0029559	Benzenoids	Benzene and substituted derivatives	Benzoic acids and derivatives	*		40.6	17.9	M+H-H2O	C12H18NO3+	-4.71838	10232.7	9993.09	9805.44	10507.7	11031	9492.48	8357.82	9960.85	10849.9	10682.1	10054.8	9521.48	7288.61	9868.95	7154.2	10254
6.09_144.0454m/z	144.045	6.09022	neg	4-Oxo-1-(3-pyridyl)-1-butanone	HMDB0062406	Organic oxygen compounds	Organooxygen compounds	Carbonyl compounds	**	C19567	40.6	14.2	M-H2O-H	C9H9NO2	-0.833886	247.91	222.388	293.708	277.275	279.72	362.12	342.404	263.714	380.802	276.866	274.964	215.558	287.418	589.363	316.753	3852.27
7.11_241.1776m/z	241.178	7.10507	pos	8,8-Dimethoxy-2,6-dimethyl-2-octanol	HMDB0040219	Organic oxygen compounds	Organooxygen compounds	Alcohols and polyols	*		40.6	5.68	M+Na	C12H26O3	0.7303	10495.6	12950.4	12438.8	11552.2	12156.5	9960.76	4184.41	7947.89	9038.1	7891.54	4002.19	4261.59	3559	5105.35	3826.54	5881.36
9.16_412.3063m/z	412.306	9.15987	pos	Noravicholic acid	LMST04060029	Lipids and lipid-like molecules	Sterol Lipids	Bile acids and derivatives			40.6	9	M+NH4	C23H38O5	1.46902	971.921	1163.1	1375.83	967.366	1281.03	117.214	4187.63	1463.08	133.754	3993.12	17048.8	18723.2	1011.58	6501.53	1983.77	5245.62
0.68_232.1303m/z	232.13	0.676333	neg	Lysinoalanine	HMDB0029447	Organic acids and derivatives	Carboxylic acids and derivatives	Amino acids, peptides, and analogues	*		40.5	7.37	M-H	C9H19N3O4	0.222682	151.536	147.576	170.894	155.539	197.458	325.989	393.365	281.53	364.862	299.112	570.31	776.7	2685.6	809.192	1982.9	546.974
0.77_180.0636n	203.053	0.773167	pos	D-Galactose	HMDB0000143	Organic oxygen compounds	Organooxygen compounds	Carbohydrates and carbohydrate conjugates	**	C00984	40.5	5.86	M+Na, M+K	C6H12O6	1.38184	13673.9	16916	15174.2	15622.4	17146.7	39524.8	61011.1	96722.3	10316.7	80785.5	49887.4	68812.2	42526.9	73407.1	79443.6	88586.5
0.95_241.0799m/z	241.08	0.952217	pos	Alanylglutamic acid	HMDB0028686	Organic acids and derivatives	Carboxylic acids and derivatives	Amino acids, peptides, and analogues	*		40.5	10.8	M+Na	C8H14N2O5	1.90464	996.6	1197.96	1463.13	1454.52	1543.49	429.076	1413.87	484.487	218.488	1342.26	3632.93	2500.79	955.567	1515.53	425.281	1499.43
1.86_159.0687n	160.076	1.8562	pos	3-Methyl-quinolin-2-ol	66381	Unclassified	Unclassified	Unclassified			40.5	7.03	M+H, M+NH4	C10H9NO	1.96062	4653.73	5061.8	5117.64	5866.66	5315.7	339.511	212.825	673.909	448.711	404.455	263.919	490.589	228.396	430.632	250.176	1134.43
10.38_180.1517n	203.143	10.3844	pos	3,6,8-dodecatrien-1-ol	LMFA05000058	Lipids and lipid-like molecules	Fatty Acyls	Fatty alcohols			40.5	8.21	M+NH4, M+Na	C12H20O	1.32293	4458.66	4467.44	4737.52	4361.14	5000.2	4839.91	4391.63	4924.69	4895.07	4306.5	4624.51	3853.57	3480.84	4348.23	4267.53	4541.19
11.63_249.1495m/z	249.15	11.6252	neg	Ketosantalic acid	HMDB0035358	Lipids and lipid-like molecules	Prenol lipids	Sesquiterpenoids	*		40.5	18.4	M-H	C15H22O3	-0.446941	7349.23	6846.33	6599.12	6992.03	7097.76	8278.59	5941.15	6963.41	8965.34	6111.15	6702.85	6631.56	6459.35	9925.22	8254.07	7675.69
13.01_226.9517m/z	226.952	13.0065	pos	3-Chloro-2-methyldienelactone	HMDB0060368	Lipids and lipid-like molecules	Fatty Acyls	Fatty acids and conjugates	*	C18309	40.5	36.1	M+K	C7H5ClO4	4.6271	512611	515719	439097	338944	312655	587453	455971	523357	592737	525694	443421	341949	275885	354840	209898	349550
3.66_242.1626m/z	242.163	3.6623	pos	QUINPIROLE	HMDB0257056	Lipids and lipid-like molecules	Prenol lipids	Terpene glycosides	*		40.5	8.94	M+Na	C13H21N3	-0.70522	338.026	351.627	293.644	354.643	272.969	241.562	1236.81	326.659	100.228	686.223	1625.28	1050.76	646.076	1768.06	327.994	618.135
4.35_231.0440m/z	231.044	4.35187	pos	6-Hydroxyindole sulfate	HMDB0240651	Organic acids and derivatives	Organic sulfuric acids and derivatives	Arylsulfates			40.5	12.3	M+NH4	C8H7NO4S	2.81862	538.824	695.822	749.968	634.081	614.223	260.235	1759.42	2395.74	974.753	5775.36	1837.04	858.647	2389.07	1562.62	1455.87	2136.43
4.44_378.1669m/z	378.167	4.44155	pos	Nitrendipine	HMDB0015187	Organoheterocyclic compounds	Pyridines and derivatives	Hydropyridines		C07713	40.5	10.6	M+NH4	C18H20N2O6	2.52323	8329.04	7204.28	8040.68	8425.89	8368.12	2468.34	2038.78	1340.46	1358.93	3769.14	2021.71	2471.62	1890.64	2479.9	1434.41	1501.07
0.77_381.1101m/z	381.11	0.769183	neg	xi-2,3-Dihydro-2-oxo-1H-indole-3-acetic acid	HMDB0035514	Organoheterocyclic compounds	Indoles and derivatives	Indolyl carboxylic acids and derivatives			40.4	7.37	2M-H	C10H9NO3	2.21391	177121	182476	171674	189326	167813	2176.22	15402.8	4150.97	1124.93	5943.07	48405.4	43963.4	6430.61	9263.95	11784	9187.12
10.79_276.1598m/z	276.16	10.7913	pos	HOMATROPINE	HMDB0253199	Unclassified	Unclassified	Unclassified			40.4	8.05	M+H	C16H21NO3	1.5438	886.273	420.509	546.407	718.023	671.725	10795.3	3008.92	4625.54	5006.27	2273.85	1014.92	1411.28	1987.78	1702.83	2014.67	1857.12
12.75_256.2637m/z	256.264	12.752	pos	(±)-2-Dodecylcyclobutanone	HMDB0037544	Organic oxygen compounds	Organooxygen compounds	Carbonyl compounds			40.4	5.79	M+NH4	C16H30O	0.811555	370182	362988	357241	342042	355223	397834	309747	351143	394788	385215	355995	384615	297138	342962	233102	350881
14.77_136.0217m/z	136.022	14.7693	pos	Benzothiazole	HMDB0032930	Organoheterocyclic compounds	Benzothiazoles	Unclassified			40.4	6.36	M+H	C7H5NS	1.19577	359572	360641	369767	342989	343679	361802	322596	367856	383091	363147	350306	329199	276886	351141	232967	330457
2.53_240.1023m/z	240.102	2.53077	pos	Flavone	HMDB0003075	Phenylpropanoids and polyketides	Flavonoids	Flavones		C15608	40.4	5.46	M+NH4	C15H10O2	1.56824	8457	8648.39	8845.97	8682.85	9858.05	452.564	920.481	239.335	1101.85	294.785	1172.12	2664.78	43.9749	873.979	1187.99	2095.4
4.16_208.0948m/z	208.095	4.16385	pos	Pseudoecgonine	HMDB0006348	Alkaloids and derivatives	Tropane alkaloids	Unclassified	*	C12449	40.4	7.46	M+Na	C9H15NO3	2.12287	21820.1	20325.1	20603.9	20715.5	21068.1	25858.3	15894.6	25105.7	25062.7	20911.5	17261.8	16788.2	12072.6	18748.2	9930.39	18718.6
9.28_368.2800m/z	368.28	9.27868	pos	11-deoxy-11-methylene-PGD2	LMFA03010103	Lipids and lipid-like molecules	Fatty Acyls	Eicosanoids			40.4	8.29	M+NH4	C21H34O4	1.41909	328.43	297.153	295.192	301.402	381.353	3338.75	7620.21	2966.02	1606.04	11506.5	49615.1	30088.2	3303.35	14296.3	3147.05	27306.1
0.91_282.1201m/z	282.12	0.911433	pos	2'-O-Methyladenosine	58235	Nucleosides, nucleotides, and analogues	Purine nucleosides	Unclassified	*	C04779	40.3	8.7	M+H	C11H15N5O4	1.62893	30488.7	29640.2	24229.3	27446.1	33256.6	1479.09	9213.62	5542.99	3734.59	6332.08	8344.31	12418.6	7592.8	6735.71	3810.43	7779.14
11.18_523.1900m/z	523.19	11.1815	neg	Hydroxyprolyl-Methionine	HMDB0028869	Organic acids and derivatives	Carboxylic acids and derivatives	Amino acids, peptides, and analogues	*		40.3	14.1	2M-H	C10H18N2O4S	-0.318998	3170.45	2910.68	4154.87	3162.71	3525.44	16164.3	42207.5	22541.4	21709.7	32269	4406.6	5295.73	79430.7	32645.7	16826.3	1550.82
13.80_271.2749m/z	271.275	13.8015	pos	Palmitoleamide	HMDB0256086	Lipids and lipid-like molecules	Fatty Acyls	Fatty amides			40.3	7.46	M+NH4	C16H31NO	1.87952	30390.8	29931.3	36812.6	35325.5	35786.1	34087.7	28287.2	35519.7	37320.1	36713.1	34557.6	28533.1	24783.3	35903.9	28158.7	37572.3
6.06_134.0611m/z	134.061	6.0645	neg	Vanillylamine	HMDB0012309	Benzenoids	Phenols	Methoxyphenols	**	C16666	40.3	3.87	M-H2O-H	C8H11NO2	-0.339158	56.8175	49.4983	56.6876	55.0175	43.7913	4349.32	1610.28	3134.82	6600.6	2856.6	714.11	1107.24	2263.72	3428.02	1177.3	530.362
6.10_179.0584n	180.066	6.10153	pos	4-Oxo-4-(3-pyridyl)-butanoic acid	5924	Organic acids and derivatives	Keto acids and derivatives	Gamma-keto acids and derivatives	**	C19569	40.3	7.95	M+H-H2O, M+H	C9H9NO3	1.03218	845.823	882.283	873.738	1059.9	1073.9	5714.93	2516.93	4274.3	8614.35	3583.96	1454.25	1758	2511.95	4111.7	1545.4	1560.6
0.54_152.9951m/z	152.995	0.539983	pos	3-oxo-4-pentenoic acid	LMFA01060166	Lipids and lipid-like molecules	Fatty Acyls	Fatty Acids and Conjugates			40.2	7.5	M+K	C5H6O3	2.33192	26480.8	29414.6	27527.1	22240.2	20773.8	32202.1	27779.3	29232.5	29989.2	28676.9	25687.6	20761.2	18444.2	24011.8	15387.6	22863.5
0.70_145.0982m/z	145.098	0.697283	neg	D-Lysine	HMDB0003405	Organic acids and derivatives	Carboxylic acids and derivatives	Amino acids, peptides, and analogues	**	C00739	40.2	4.36	M-H	C6H14N2O2	-0.307559	2088.63	2452.42	3896.83	2573.35	2732.75	788.7	4004.59	1822.97	1140.26	1346.91	2430.76	4529.32	6437.76	1785.62	5128.05	1575.23
1.19_229.1551m/z	229.155	1.1916	pos	Orciprenaline	HMDB0014954	Benzenoids	Phenols	Benzenediols		C07144	40.2	6.42	M+NH4	C11H17NO3	1.84198	101039	105568	101685	101949	114793	152654	20986.9	49545.1	134330	61131.2	31524	17356.1	22865.2	60513.4	13348.3	19488.5
1.63_237.0915m/z	237.091	1.6349	neg	15(R)-hydroperoxy-EPE	HMDB0062295	Organoheterocyclic compounds	Diazinanes	Piperazines			40.2	7.75	M-H	C8H18N2O4S	0.106323	4569.13	4287.5	4596.65	4179.77	4549.07	69.8565	4012.03	122.225	200.8	461.633	7058.48	4869.67	5209.85	1524.06	4896.08	1173.63
12.03_271.2277m/z	271.228	12.0333	neg	(R)-3-Hydroxy-hexadecanoic acid	HMDB0010734	Lipids and lipid-like molecules	Fatty Acyls	Fatty acids and conjugates	*		40.2	6.05	M-H	C16H32O3	-0.442563	10404.9	11278.8	11003.5	10797.9	11427.1	7065.89	6451.45	7297.45	7563.16	6894.1	5592.89	6570.32	6578.7	8038.28	7025.56	6613.45
0.83_288.0837m/z	288.084	0.82665	neg	Arabinofuranosylcytosine	HMDB0248553	Nucleosides, nucleotides, and analogues	Pyrimidine nucleosides	Unclassified	*	C02961	40.1	7.68	M+FA-H	C9H13N3O5	0.0370748	14859.5	15869.8	16362.1	19206.4	16779.2	1916.1	3726.94	323.349	1045.64	1791.25	3764.18	4194.55	931.194	3096.55	294.197	5992.76
1.02_226.1053m/z	226.105	1.01717	pos	Acetyl-D-carnitine	LMFA07070049	Lipids and lipid-like molecules	Fatty Acyls	Fatty esters			40.1	11.9	M+Na	C9H17NO4	1.75014	3481.86	3869.13	4255.26	4469.85	4019.46	2501.35	8210.3	4092.72	2639.43	4526.14	13144.3	9432.66	5917.89	6040.98	4421.65	7560.64
1.38_332.0969m/z	332.097	1.38387	pos	1-Salicylate glucuronide	HMDB0010313	Organic oxygen compounds	Organooxygen compounds	Carbohydrates and carbohydrate conjugates	*		40.1	10.7	M+NH4	C13H14O9	-2.22189	11875.5	10092.7	9368.62	7187.62	7975.47	1317.95	3697.3	672.536	922.377	2955.57	9782.18	7281.02	815.684	4536.6	4904.27	9246.11
10.02_453.1678m/z	453.168	10.0225	pos	Eplerenone	HMDB0014838	Lipids and lipid-like molecules	Steroids and steroid derivatives	Steroid lactones		C12512	40.1	4.81	M+K	C24H30O6	1.06742	501212	442357	530690	500373	494188	338663	350062	297322	383738	350787	308896	266403	241898	425973	215534	435884
10.03_215.1651m/z	215.165	10.0259	neg	undecanal	LMFA06000064	Organic oxygen compounds	Organooxygen compounds	Carbonyl compounds	*		40.1	2.21	M+FA-H	C11H22O	-0.798907	6030.33	6352.37	6624.65	6524.7	6987.5	3177.55	3751.31	4298.38	2807.6	3743.33	4880.19	7743.25	2490.17	4790.77	4145.49	4241.97
10.04_186.1854m/z	186.185	10.0412	pos	10-undecenal	LMFA06000067	Organic oxygen compounds	Organooxygen compounds	Carbonyl compounds	*		40.1	4.61	M+NH4	C11H20O	1.24163	3204.21	3108.54	2866.48	2804.03	3469.86	2629.94	2819.68	3327.08	2872.48	2657.52	2653.87	2646.58	2410.35	3912.65	1781.7	2770.05
10.84_101.0238m/z	101.024	10.836	pos	Erythrono-1,4-lactone	HMDB0000349	Organoheterocyclic compounds	Lactones	Gamma butyrolactones	*		40.1	7.49	M+H-H2O	C4H6O4	4.09636	653.991	708.316	430.301	449.651	694.679	680.975	565.547	716.907	599.116	517.405	547.912	553.734	425.344	575.267	465.166	694.616
11.13_619.2887m/z	619.289	11.1311	neg	PKHdiA-PG	LMGP20060012	Lipids and lipid-like molecules	Glycerophospholipids	Oxidized glycerophospholipids			40.1	2.65	M-H2O-H	C29H51O13P	-0.266193	55019.7	55556.9	52861.9	57715.6	53920.8	32832.9	484278	188543	33096.1	339012	463460	471772	275252	494110	533175	372173
7.83_345.0874m/z	345.087	7.82857	pos	(-)-Isolonchocarpin	LMPK12140015	Lipids and lipid-like molecules	Polyketides	Flavonoids			40.1	8.94	M+K	C20H18O3	-4.48515	75495.5	79307.1	78503.5	79519.5	76658	68829.2	67480.7	66747	77155.8	73860.2	67233.8	65431.6	57174.4	78284.6	56909	74335.7
10.00_318.2198n	336.251	9.9972	pos	5-Oxo-ETE	3844	Lipids and lipid-like molecules	Fatty Acyls	Eicosanoids	**	C14732	40	7.91	M+H-H2O, M+H, M+NH4	C20H30O3	0.860322	63989.2	63404.4	64801.7	68136.4	66567.5	61058.5	56218.7	64388.6	65808.2	56332.1	59997.6	55805.1	59217.6	72297.5	46767.1	64845.7
10.30_216.1728n	199.17	10.2969	pos	12-Hydroxydodecanoic acid	HMDB0002059	Organic acids and derivatives	Hydroxy acids and derivatives	Medium-chain hydroxy acids and derivatives	*	C08317	40	10.6	M+H-H2O, M+H	C12H24O3	1.14279	10045.6	10179.9	9718.99	8292.74	9583.48	10622.6	8180	9871.26	9866.31	8957.5	8537.32	7516.6	7541.95	8302.08	5290.49	8172.92
10.60_335.2198m/z	335.22	10.5968	pos	gamma- 6,7-DiHODE	LMFA02000048	Lipids and lipid-like molecules	Fatty Acyls	Octadecanoids			40	6.4	M+Na	C18H32O4	1.67352	9968.21	10238.6	9541.62	9679.7	9424.81	4366.41	4555.43	4177.84	4583.79	7154.86	4525.64	4661.18	3369.03	5059.32	22336.7	4556.65
3.61_270.1694m/z	270.169	3.60977	pos	3alpha-Hydroxyoreadone	HMDB0036047	Organoheterocyclic compounds	Naphthofurans	Unclassified			40	4.77	M+NH4	C14H20O4	-2.13641	1850.22	1745.74	1670.9	1737.91	1782.41	357.109	4202.9	1726.71	287.938	1981.82	2933.62	2127.36	2283.36	1782.59	2791.17	1965.99
3.90_144.0811m/z	144.081	3.89823	pos	1-(2,3-Dihydro-1H-pyrrolizin-5-yl)-2-propen-1-one	HMDB0040028	Organoheterocyclic compounds	Pyrrolizines	Unclassified			40	4.14	M+H-H2O	C10H11NO	1.73548	9957.67	9813.78	10434.2	12064.7	10331	3063.59	5539.35	2604.79	2743.08	2396.33	6925.28	7538.8	4223.05	2440.67	3812.71	3967.23
4.58_698.3732m/z	698.373	4.58203	pos	Canarigenin 3-[glucosyl-(1->4)-6-deoxy-alloside]	HMDB0035433	Lipids and lipid-like molecules	Steroids and steroid derivatives	Steroidal glycosides	*		40	9.54	M+NH4	C35H52O13	-2.0472	1605.21	2234.42	1867.01	1867.15	1450.93	836.675	12289.5	5473.04	206.922	4220.64	1871.94	3103.15	7162.38	2404.59	40596.5	732.264
4.76_279.1708m/z	279.171	4.7622	pos	Isoleucyl-Phenylalanine	85820	Organic acids and derivatives	Carboxylic acids and derivatives	Amino acids, peptides, and analogues	*		40	7.14	M+H	C15H22N2O3	1.73006	1409.67	1933.67	1725.27	1365.87	1961.73	2022.23	1050.23	756.809	1642.3	1040.57	5627.74	4035.18	2192.04	5001.79	2387.72	2452.52
9.95_378.2415m/z	378.241	9.95472	neg	Phytosphingosine 1-phosphate	LMSP01050003	Lipids and lipid-like molecules	Sphingolipids	Sphingoid bases			40	3.58	M-H2O-H	C18H40NO6P	-0.000763951	1070.3	1425.96	1680.44	1391.62	1231.22	133663	5334.97	5519.22	28476.2	8838.53	2043.37	642.699	5837.18	7623.19	1215.34	586.102
1.18_220.0559n	201.038	1.1804	neg	Chrycorin	HMDB0035149	Organoheterocyclic compounds	Oxanes	Unclassified	*		39.9	10.7	M-H2O-H, 2M-H	C12H12O2S	0.371933	292368	311372	327737	360509	341512	139209	187946	111016	224821	166413	293656	176664	95906.2	127761	114934	199681
1.21_306.0404n	345.002	1.21112	pos	4-hydroxy-5-[4-hydroxy-3-(sulfooxy)phenyl]pentanoic acid	HMDB0127746	Lipids and lipid-like molecules	Fatty Acyls	Fatty acids and conjugates	*		39.9	8.57	M+Na, M+K, M+H-H2O	C11H14O8S	-1.79498	21054.1	23263.1	23121.1	23602.4	19537.2	2607.27	47891.6	12610.9	6432.29	38591.8	54006.8	60418.4	22581	40159.8	26537.8	61296.8
10.01_416.3375m/z	416.337	10.014	pos	3-hydroxyhexadecanoyl carnitine	HMDB0061642	Lipids and lipid-like molecules	Fatty Acyls	Fatty acid esters	***		39.9	4.94	M+H	C23H45NO5	1.00515	12876.2	9938.46	13397	12563.2	12118.5	5.88962e-06	11208.2	1181.46	309.177	2744.78	57569	55450.4	1904.74	8361.86	1918.82	4667.7
10.14_191.1078m/z	191.108	10.1358	neg	2-Methyl-2-cyclopenten-1-one	HMDB0031545	Organic oxygen compounds	Organooxygen compounds	Carbonyl compounds	*		39.9	0	2M-H	C6H8O	0.0714122	627.891	729.712	731.573	790.751	593.695	436.09	507.081	266.985	655.914	234.864	724.715	674.733	428.649	598.387	544.288	839.826
11.04_243.1964m/z	243.196	11.0406	neg	Tridecanal	HMDB0030928	Lipids and lipid-like molecules	Fatty Acyls	Fatty aldehydes	*		39.9	2.72	M+FA-H	C13H26O	-0.807165	7716.65	6735.71	6864.59	7814.79	6729.12	3989.7	3737.96	4424.37	4256.31	3839.3	4486.59	6495.27	3857.44	4808.01	5951.48	4784.52
11.19_481.3541n	482.361	11.1941	pos	PC(O-15:0/O-1:0)[U]	40201	Unclassified	Unclassified	Unclassified			39.9	3.73	M+H, M+Na	C24H52NO6P	1.72741	128366	126558	136857	151616	151976	35897.6	24266.7	22028.1	16323.9	27956.1	15564.5	22887.6	23301	22159.8	17979.4	18579.6
11.68_372.2866n	395.277	11.6787	pos	DG(8:0/0:0/10:0)	HMDB0092902	Lipids and lipid-like molecules	Glycerolipids	Diradylglycerols	*		39.9	8.44	M+H-H2O, M+Na	C21H40O5	-2.68218	21986.3	19230.8	25523.7	25624.1	27280.1	3228.19	2886.4	3671.55	4182.51	3334.59	3555.09	3803.4	2923.86	3492.42	1457.27	2499.35
11.87_232.1698m/z	232.17	11.8707	pos	N,O-Didesmethylvenlafaxine	HMDB0060852	Organic oxygen compounds	Organooxygen compounds	Alcohols and polyols	*		39.9	6.03	M+H-H2O	C15H23NO2	0.995461	4741.36	5211.35	5516.98	5115.31	5088.04	6810.16	5844.13	5756.23	6235.03	6123.5	6669.51	3941.59	4743.16	5843.13	3224.18	4844.1
2.01_192.0337m/z	192.034	2.01472	neg	Thiomorpholine 3-carboxylate	HMDB0059611	Organic acids and derivatives	Carboxylic acids and derivatives	Amino acids, peptides, and analogues		C03901	39.9	11	M+FA-H	C5H9NO2S	0.407299	2425.64	2498.34	2648.59	2556.09	2761.94	5.88962e-06	925.379	5.88962e-06	5.88962e-06	5.88962e-06	3901.85	2923.4	135.339	810.832	5.88962e-06	1668.54
2.58_259.1539n	282.143	2.58332	pos	Isoleucyl-Glutamine	HMDB0028905	Organic acids and derivatives	Carboxylic acids and derivatives	Amino acids, peptides, and analogues	*		39.9	6.57	M+H, M+Na	C11H21N3O4	2.48887	939.955	942.126	1069.63	1038.13	1487.6	0.770717	409.204	5.88962e-06	5.88962e-06	5.88962e-06	4117.27	9870.9	567.778	1679.02	821.746	10344.9
2.58_268.1273m/z	268.127	2.58332	pos	Isoleucyl-Asparagine	HMDB0028902	Organic acids and derivatives	Carboxylic acids and derivatives	Amino acids, peptides, and analogues	*		39.9	8.74	M+Na	C10H19N3O4	1.99967	1022.76	894.531	1162.48	997.116	1365.96	0.0417105	407.933	1.22898	5.88962e-06	5.88962e-06	2072.87	1733.24	468.579	351.755	3439.99	1083.73
3.37_382.1005m/z	382.101	3.3686	neg	(S)-malyl N-acetyl-alpha-D-glucosaminide	LMFA13010059	Lipids and lipid-like molecules	Fatty Acyls	Fatty acyl glycosides			39.9	7.27	M+FA-H	C12H19NO10	4.29049	52802.4	52529.4	46528.6	55967.8	56659.2	109.941	5260.92	656.519	417.791	3167.15	14696.6	8005.07	2875.7	4296.11	4102.75	6522.98
4.53_148.1103n	171.1	4.527	pos	(2R,3R)-heptane-1,2,3-triol	LMFA05000549	Lipids and lipid-like molecules	Fatty Acyls	Fatty alcohols			39.9	3.64	M+H, M+Na	C7H16O3	2.28836	238589	227927	234812	226203	213925	220972	102204	189861	180233	177690	140304	143473	65968	139419	100247	144071
5.11_175.0976m/z	175.098	5.11485	neg	Butyric acid	LMFA01010004	Lipids and lipid-like molecules	Fatty Acyls	Fatty acids and conjugates	**	C00246	39.9	0	2M-H	C4H8O2	-0.000740262	711.943	636.866	634.969	682.835	648.247	333.984	265.334	382.743	719.633	442.846	306.684	284.392	398.795	493.301	365.024	364.965
5.12_373.2137m/z	373.214	5.12455	pos	Tetrahydrodeoxycorticosterone	HMDB0000879	Lipids and lipid-like molecules	Steroids and steroid derivatives	Hydroxysteroids	**	C13713	39.9	16.2	M+K	C21H34O3	-0.827044	2078.84	1420.32	1586.04	2018.02	2321.29	2261.38	1579.2	2457.39	1209.44	2111.69	1643.44	2274.1	1449.04	1888.82	21723.1	2690.62
5.49_190.0716m/z	190.072	5.48708	pos	Dihydrolipoamide	LMFA08010019	Lipids and lipid-like molecules	Fatty Acyls	Fatty amides	*	C00579	39.9	9.59	M+H-H2O	C8H17NOS2	-1.21092	3621.29	3485.85	3155.57	3315.59	3433.74	1526.02	1015.92	1120.34	1393.33	1268.57	1382.68	1418.71	783.126	1463.34	472.691	1102.5
5.53_227.1289m/z	227.129	5.5264	neg	delta-Hexanolactone	HMDB0000453	Organoheterocyclic compounds	Lactones	Delta valerolactones	*		39.9	0	2M-H	C6H10O2	0.103797	1051.68	1023.45	1310.01	1262.71	1163.47	1426.43	963.439	1280.58	1273.45	1107.22	1085.51	1106.44	1290.72	1231.58	1155.91	1384.37
7.00_618.3060m/z	618.306	7.00202	pos	PKOHA-PS	LMGP20040010	Lipids and lipid-like molecules	Glycerophospholipids	Oxidized glycerophospholipids			39.9	6.12	M+H-H2O	C29H50NO12P	3.56923	136313	134480	133878	140292	146474	2268.75	138.996	5.88962e-06	633.722	66.0042	752.119	492.311	5.88962e-06	2160.33	60.4971	563.455
9.38_242.2844m/z	242.284	9.37742	pos	1-Hexadecylamine	4110	Unclassified	Unclassified	Unclassified			39.9	3.57	M+H	C16H35N	0.77395	14296.3	13213.7	15481.8	20423.5	20891.7	15436	11668.8	16721.2	17148.1	10445.3	15000	16043.5	13669.3	15414.6	12725.2	19892.8
0.75_132.0534n	131.046	0.748083	neg	Ureidopropionic acid	HMDB0000026	Organic acids and derivatives	Organic carbonic acids and derivatives	Ureas	**	C02642	39.8	0	M-H, 2M-H	C4H8N2O3	-0.383879	22352.9	18750.9	18853.2	18652	26172	5400.44	5221.46	5167.82	7857.36	5122.33	6584.57	10829	14243.6	7250.01	5556.02	7544.24
0.79_539.1385m/z	539.138	0.78745	neg	4'-O-methyl-(-)-epicatechin-3'-O-beta-glucuronide	HMDB0029180	Phenylpropanoids and polyketides	Flavonoids	Flavonoid glycosides	*		39.8	13.5	M+FA-H	C23H26O12	-4.40152	4124.15	5104.1	4636.94	4400.22	5022.04	140081	388682	319647	151738	230235	74922.2	134308	204282	50933.4	366530	196953
0.87_487.1789m/z	487.179	0.870567	pos	(S)-Multifidol 2-[apiosyl-(1->6)-glucoside]	HMDB0039930	Organic oxygen compounds	Organooxygen compounds	Carbohydrates and carbohydrate conjugates			39.8	9.9	M+H-H2O	C22H32O13	-4.07534	32574.4	34541.2	35853.6	29343.2	40838.2	89.4447	478.93	78.5496	116.777	378.371	1872.7	6056.26	97.6613	5.88962e-06	151.618	165.324
0.89_328.0645n	655.109	0.889467	neg	Cabbage identification factor 2	HMDB0033622	Organic acids and derivatives	Carboxylic acids and derivatives	Amino acids, peptides, and analogues			39.8	9.87	M-H2O-H, 2M-H	C15H12N4O3S	4.57121	97164.9	85924.1	85136.2	92472.5	94275.1	129786	46437.5	57979	134892	63305.6	48590.5	61047.9	32390.6	104542	24976.1	69351.2
1.49_186.1493m/z	186.149	1.49398	pos	4E,9-decadienoic acid	LMFA01030210	Lipids and lipid-like molecules	Fatty Acyls	Fatty Acids and Conjugates			39.8	7.92	M+NH4	C10H16O2	2.68183	112.69	139.249	139.664	154.181	150.415	293.364	911.396	1634.92	4013.46	1221.36	202.547	785.277	224.006	417.704	161.404	225.964
1.67_188.1158m/z	188.116	1.66957	pos	Immepip	HMDB0253436	Unclassified	Unclassified	Unclassified			39.8	2.5	M+Na	C9H15N3	0.132591	377.692	297.253	414.065	445.507	506.973	4169.74	1042.89	5267.41	10501.4	2736.19	611.661	787.833	1353.51	3116.25	441.761	633.749
10.24_287.2228m/z	287.223	10.2427	neg	Caprylic acid	HMDB0000482	Lipids and lipid-like molecules	Fatty Acyls	Fatty acids and conjugates	**	C06423	39.8	0	2M-H	C8H16O2	0.00333846	1220.19	1287.87	1265.11	1111.13	1465.85	960.93	1029.56	1068.67	1233.11	944.847	979.867	1286.14	1030.3	1597.46	1257.05	1282.55
10.38_258.2067m/z	258.207	10.3756	pos	(1S,2S)-3-oxo-2-pentyl-cyclopentanebutanoic acid	LMFA02010016	Lipids and lipid-like molecules	Fatty Acyls	Octadecanoids			39.8	5.83	M+NH4	C14H24O3	1.49193	6934.11	7795.05	6615.8	6558.17	7947.42	8462	7150.67	8981.11	9413.29	8010.3	7705.12	6260.49	5487.23	8105.96	3905.54	6537.68
11.11_316.2850m/z	316.285	11.1054	pos	9-Oxooctadecanoic acid	HMDB0030979	Lipids and lipid-like molecules	Fatty Acyls	Fatty acids and conjugates	*		39.8	8.19	M+NH4	C18H34O3	1.3276	775.782	750.314	930.818	438.679	806.473	1468.01	841.099	1372.17	747.078	1041.14	884.661	1149.79	803.75	945.613	3121.13	1632.59
11.22_318.2189n	319.226	11.2159	pos	LTA4	LMFA03020023	Lipids and lipid-like molecules	Fatty Acyls	Fatty acids and conjugates	**	C00909	39.8	8.13	M+H, M+Na, M+H-H2O	C20H30O3	-1.79961	32450.8	29505.2	30396.3	30054.4	30402.8	10182.4	9013.21	9276.89	11272.1	9569.49	9079.74	8668.97	10372.4	10161.8	6584.39	9921.68
3.87_329.0287m/z	329.029	3.87258	neg	Inosine 2',3'-cyclic phosphate	HMDB0011680	Organoheterocyclic compounds	Tetrapyrroles and derivatives	Porphyrins	**	C05768	39.8	4.59	M-H	C10H11N4O7P	-1.6634	6641.95	4984.43	4759.3	5585.3	5066.9	2985.16	5428.38	1758.06	2387.43	1731.31	5348.21	5326.83	5428.99	2003.72	4294.64	3663.74
4.32_229.0287m/z	229.029	4.31855	neg	Asulam	HMDB0248680	Unclassified	Unclassified	Unclassified			39.8	6.89	M-H	C8H10N2O4S	-0.45614	590.214	508.654	539.021	505.463	589.17	261.692	2894.23	2641.38	1266.52	6650.1	2345.43	984.363	6911.87	2142.87	4284.82	2652.81
4.99_148.0615m/z	148.062	4.99475	neg	Dimethylglycine	HMDB0000092	Organic acids and derivatives	Carboxylic acids and derivatives	Amino acids, peptides, and analogues	**	C01026	39.8	0	M+FA-H	C4H9NO2	0.163709	1377.2	1449.5	1270.6	1304.53	1393.96	1360.58	1179.76	1320.97	1794.69	1124.2	1124.13	1305.36	1179.13	1403.58	1282.67	1177.27
5.54_148.0615m/z	148.062	5.5355	neg	gamma-Aminobutyric acid	HMDB0000112	Organic acids and derivatives	Carboxylic acids and derivatives	Amino acids, peptides, and analogues	**	C00334	39.8	0	M+FA-H	C4H9NO2	0.0893714	1047.3	1136.06	1024.13	1038.98	1127.26	1329.38	1074.22	1138.77	1197.03	1081.97	1033.14	1256.4	1052.73	1178.98	1202.75	1072.73
5.74_214.1449m/z	214.145	5.73875	neg	Nitramine	68167	Unclassified	Unclassified	Unclassified			39.8	0	M+FA-H	C10H19NO	-0.0367741	10516.6	9336.4	11122.8	11329.7	10335.5	10896	10958.4	10286.4	11497	10785.1	11127.5	11460.2	12530.4	13749	14911.9	13142.5
6.02_130.1228m/z	130.123	6.0159	pos	2-Methylcyclohexanone	HMDB0031539	Organic oxygen compounds	Organooxygen compounds	Carbonyl compounds	*		39.8	2.72	M+NH4	C7H12O	1.75788	3906.64	4001.81	3992.75	4610.07	4679.78	3673.61	3444.32	3702.13	3759.65	3554.66	3821	3630.1	3386.08	4133.05	2703.26	3976.74
6.09_251.1620m/z	251.162	6.09218	pos	2-keto tridecanoic acid	LMFA01060041	Lipids and lipid-like molecules	Fatty Acyls	Fatty Acids and Conjugates			39.8	2.34	M+Na	C13H24O3	1.01994	4653.93	4595.53	4627.25	5259.78	4615.95	6915.03	6088.93	6376.94	5578.84	5563.68	5284.36	5940.07	4915.51	5923.86	3921.82	8003.49
6.96_213.0153m/z	213.015	6.96315	neg	1,2-Dinitrobenzene	HMDB0244084	Unclassified	Unclassified	Unclassified			39.8	0.943	M+FA-H	C6H4N2O4	0.154452	876.856	851.766	1041.12	991.434	1072.74	10381.3	2534.34	6642.26	9104.62	6547	8222.71	4713.71	5309.67	4977.4	4057.53	10946.6
7.06_372.2391m/z	372.239	7.0616	neg	10-Nitrooleate	HMDB0247556	Unclassified	Unclassified	Unclassified			39.8	2.57	M+FA-H	C18H33NO4	-0.323976	15376.9	16729	16216.1	16442.7	15903	19654.5	16710.5	21467	23128.9	19424	16897.2	17104.1	16875.4	16967.6	17415.5	18354.5
7.35_249.1107m/z	249.111	7.35183	neg	5-Methylcytosine	3247	Organoheterocyclic compounds	Diazines	Pyrimidines and pyrimidine derivatives	**	C02376	39.8	0	2M-H	C5H7N3O	0.410828	784.565	901.72	858.213	900.701	925.088	566.924	230.391	327.917	211.797	249.672	223.084	230.498	338.221	217.723	788.647	299.734
9.69_211.1340m/z	211.134	9.69097	neg	(-)-Nopol	86655	Lipids and lipid-like molecules	Prenol lipids	Monoterpenoids	*		39.8	0	M+FA-H	C11H18O	-0.074026	514.208	575.827	622.783	407.125	579.006	347.604	162.973	204.156	130.364	148.957	164.039	144.706	200.25	186.563	184.787	191.436
0.79_443.1212m/z	443.121	0.78745	neg	CBHA	44839	Unclassified	Unclassified	Unclassified			39.7	0	2M-H	C10H10N2O4	0.724322	22893	21185.2	21419	25027.1	25350.8	373.673	553.338	613.404	3701.62	2101.26	904.962	1420.02	532.949	1438.89	5.88962e-06	5.88962e-06
0.93_231.0623m/z	231.062	0.9311	neg	Kifunensine	HMDB0253800	Unclassified	Unclassified	Unclassified			39.7	6.03	M-H	C8H12N2O6	0.268587	2229.58	2318.87	2382.08	2708.96	2495.36	5.88962e-06	148.287	5.88962e-06	5.88962e-06	5.88962e-06	168.229	119.255	151.741	61.8206	83.0176	133.832
1.30_107.0495m/z	107.05	1.29677	pos	1-(2-Furanyl)-2-propanone	HMDB0032917	Organoheterocyclic compounds	Heteroaromatic compounds	Unclassified			39.7	15.1	M+H-H2O	C7H8O2	3.08254	1613.86	1658.75	2044.82	2002.27	2204.27	980.989	1542.01	1192.12	1196.96	1315.11	1489.62	1730.41	1543.06	1648.56	1242.24	1448.18
1.31_257.0779m/z	257.078	1.311	neg	Pyroglutamic acid	HMDB0000267	Organic acids and derivatives	Carboxylic acids and derivatives	Amino acids, peptides, and analogues	**	C01879	39.7	0	2M-H	C5H7NO3	0.130891	784.875	806.986	794.893	980.953	963.797	60.2828	265.151	196.665	59.8158	452.915	386.346	461.923	306.461	274.889	304.701	523.987
1.38_385.1001m/z	385.1	1.37747	neg	3'-Ketolactose	HMDB0001030	Organic oxygen compounds	Organooxygen compounds	Carbohydrates and carbohydrate conjugates	*	C05403	39.7	15.3	M+FA-H	C12H20O11	3.96029	4762.14	6328.43	7904.6	6098.43	5580.4	156.135	265.898	97.1996	496.169	485.45	511.055	298.972	5.88962e-06	452.553	445.109	3084.06
1.83_283.0683m/z	283.068	1.83022	neg	Xanthopterin-B2	65749	Unclassified	Unclassified	Unclassified			39.7	0	M+FA-H	C9H10N4O4	-0.266818	53512.3	55848	56964.5	55733	58238.8	5.88962e-06	7105.24	2393.59	167.471	3840.15	7540.66	7912.49	5904.97	12888.4	2367.55	9826.96
10.51_275.1653m/z	275.165	10.5092	neg	Sugeonyl acetate	LMPR0103450004	Lipids and lipid-like molecules	Prenol lipids	Isoprenoids			39.7	1.26	M-H	C17H24O3	-0.0641014	142405	147532	128875	140588	134198	144141	135228	142358	173758	147529	125823	127292	140933	153138	145490	148876
10.63_283.1913m/z	283.191	10.6342	neg	4-ene-Valproic acid	LMFA01030982	Lipids and lipid-like molecules	Fatty Acyls	Fatty acids and conjugates	**	C16648	39.7	0	2M-H	C8H14O2	-0.669834	843.6	915.513	761.983	596.925	852.716	714.611	483.458	646.914	834.45	552.502	575.727	643.931	791.419	645.662	715.894	747.414
11.55_121.0287m/z	121.029	11.5465	pos	4-Hydroxybenzoic acid	HMDB0000500	Benzenoids	Benzene and substituted derivatives	Benzoic acids and derivatives	***	C00156	39.7	5.16	M+H-H2O	C7H6O3	1.98151	1494.6	1487.6	1597.61	1541.92	1609.58	1991.48	1527.69	1849.36	1977.88	1694.07	1656.34	1715.95	1309.23	1642.64	1204.54	1840.98
11.57_183.1381m/z	183.138	11.5687	pos	xi-2-Hexyl-5-methyl-3(2H)-furanone	92782	Organoheterocyclic compounds	Dihydrofurans	Furanones			39.7	2.21	M+H	C11H18O2	0.921046	3310.88	3514.2	3142.83	3091.55	3242.02	243.543	191.017	339.666	276.347	66.6465	5.88962e-06	219.112	263.952	227.711	71.6162	5.88962e-06
11.70_458.3399n	481.33	11.7011	pos	(3beta,5alpha,9alpha,22E,24R)-3,5,9-Trihydroxy-23-methylergosta-7,22-dien-6-one	HMDB0032669	Lipids and lipid-like molecules	Steroids and steroid derivatives	Ergostane steroids	*		39.7	21.1	M+H-H2O, M+Na	C29H46O4	0.553652	11977.2	11324.5	12125.1	13724.8	14799	2206.23	1291.72	2740.55	2461.29	1922.29	2181.18	2610.09	1566.27	1996.15	2783.63	1728.91
12.25_311.2197m/z	311.22	12.2454	pos	(S)-10,16-Dihydroxyhexadecanoic acid	HMDB0037798	Lipids and lipid-like molecules	Fatty Acyls	Fatty acids and conjugates	*	C08285	39.7	4.21	M+Na	C16H32O4	1.33496	4751.36	4526.3	4897.18	4288.7	4487.8	6803.06	5773.39	7423.48	6389.32	7485.86	5687.31	5654.48	4585.08	5874.17	3339.55	6689.74
12.37_318.2774n	341.267	12.3709	pos	1-O-(2R-hydroxy-pentadecyl)-sn-glycerol	LMGL01020062	Lipids and lipid-like molecules	Glycerolipids	Monoradylglycerols			39.7	2.75	M+H, M+NH4, M+Na	C18H38O4	1.28571	184241	166058	180853	187739	194563	228241	198800	209850	232272	226895	208101	196893	173414	209407	166249	195315
14.83_155.1180m/z	155.118	14.8274	pos	Tyramine	HMDB0000306	Benzenoids	Benzene and substituted derivatives	Phenethylamines	***	C00483	39.7	0	M+NH4	C8H11NO	0.666674	3140.51	3021.5	3092.09	3224.2	3168.05	2961.77	2620.95	3064.24	3192.29	3064.97	2834.27	2825.23	2462.93	3097.31	2091.24	3147.06
15.09_205.0862m/z	205.086	15.0918	pos	Edrophonium	HMDB0015145	Benzenoids	Benzene and substituted derivatives	Aniline and substituted anilines		C06976	39.7	0	M+K	C10H16NO+	-0.666262	49630	51889	53429.1	52959.8	54025.5	52775.6	51101.9	59364.4	58980.3	56703	53896.7	50437.2	39788.6	52757	36719	51368.3
15.12_255.2329m/z	255.233	15.1164	neg	1-Pentadecene	87394	Hydrocarbons	Unsaturated hydrocarbons	Unsaturated aliphatic hydrocarbons	*		39.7	0	M+FA-H	C15H30	-0.19846	21789	30907.5	37304.5	43168	44273.9	40923.2	35166.8	42091	43253.1	37422.6	29417.8	30805.1	39111.4	39348	41028.4	42634.9
15.51_113.0711m/z	113.071	15.5055	pos	2-Hydroxypyridine	HMDB0013751	Organoheterocyclic compounds	Pyridines and derivatives	Hydropyridines	*	C02502	39.7	6.55	M+NH4	C5H5NO	2.00871	3077.27	5124.55	5475.71	6106.62	5775.66	4087.94	4050.52	4534.83	5066.27	5287.44	3484.01	5227.71	4748.66	4957.51	3676.49	6183.6
2.47_120.0446m/z	120.045	2.46655	pos	4-Nitrotoluene	HMDB0246551	Unclassified	Unclassified	Unclassified			39.7	6.23	M+H-H2O	C7H7NO2	1.39788	2368.63	2256.11	2348.42	2983.35	2524.86	394.915	1191.51	501.79	502.236	679.461	1315.25	1230.31	1316.39	893.544	837.369	889.756
2.47_504.0091m/z	504.009	2.47267	neg	alpha,beta-Methylene ATP	HMDB0248246	Unclassified	Unclassified	Unclassified			39.7	0.574	M-H	C11H18N5O12P3	-0.30494	20662.7	21756.8	22366.8	26700.3	28739.9	18541.5	42944.3	20992.8	19191.5	31311	39451.5	45272.2	54207.9	35162	45995.2	32540.8
3.87_226.0716n	271.07	3.87258	neg	L-arogenate	HMDB0304400	Unclassified	Unclassified	Unclassified			39.7	1.34	M-H, M+FA-H	C10H12NO5-	0.342024	68898.9	49885.3	48567.6	56995.5	49174	29055.6	54940	18292.4	24794.3	17747.3	53950.1	54072.2	51790.7	19916.3	43655.2	35830.2
4.14_405.2270m/z	405.227	4.14063	neg	Isopentenyladenine	6612	Unclassified	Unclassified	Unclassified			39.7	0	2M-H	C10H13N5	0.0990084	555.264	558.412	504.215	714.163	665.561	213.123	494.438	208.909	113.458	374.26	646.239	665.379	748.212	434.209	355.413	862.426
4.59_153.0193m/z	153.019	4.58532	neg	Quinone	6905	Organic oxygen compounds	Organooxygen compounds	Carbonyl compounds	*	C00472	39.7	0	M+FA-H	C6H4O2	-0.0348971	1348.23	1583.92	1626.09	1716.4	1767.79	577.224	544.148	1191.18	369.111	358.634	574.692	328.254	736.662	772.147	618.824	533.478
4.79_224.0744m/z	224.074	4.78533	pos	Methyl (Z)-5-(5-methyl-2-thienyl)-2-penten-4-ynoate	HMDB0033995	Lipids and lipid-like molecules	Fatty Acyls	Fatty acid esters	*		39.7	11.3	M+NH4	C11H10O2S	2.2548	162.567	178.361	206.138	238.292	227.644	106.425	2619.34	302.208	74.9515	208.801	2362	1384.03	306.019	699.732	95.8048	1466.1
4.93_223.0248m/z	223.025	4.93122	neg	2-Furoic acid	2266	Organoheterocyclic compounds	Furans	Furoic acid and derivatives	**	C01546	39.7	0	2M-H	C5H4O3	0.0306291	981.823	915.033	934.985	1020.36	994.347	1304.6	1128.37	1294.4	1465.15	1185.32	889.62	1367.36	1144.43	1201.2	1345.57	912.355
5.14_223.0977m/z	223.098	5.14147	neg	trans-1,2-Dihydrobenzene-1,2-diol	HMDB0001164	Organic oxygen compounds	Organooxygen compounds	Alcohols and polyols	*	C04221	39.7	0	2M-H	C6H8O2	0.408253	719.448	628.94	582.985	755.979	534.559	24.2519	15.1126	66.0397	122.07	24.1095	126.336	78.7557	39.478	76.0553	36.6772	22.463
5.35_175.0975m/z	175.098	5.3457	neg	Isobutyric acid	LMFA01020071	Organic acids and derivatives	Carboxylic acids and derivatives	Carboxylic acids	**	C02632	39.7	0	2M-H	C4H8O2	-0.332232	456.885	488.709	536.436	626.438	428.423	295.326	135.516	242.651	545.139	445.507	182.142	196.854	318.394	375.582	289.209	166.7
5.39_153.0557m/z	153.056	5.38892	neg	p-Cresol	HMDB0001858	Benzenoids	Phenols	Cresols	**	C01468	39.7	0	M+FA-H	C7H8O	-0.498842	789.258	800.605	824.103	762.486	866.397	1082.8	946.503	945.387	1006.84	912.605	944.654	949.886	994.775	934.775	1034.82	997.354
5.88_227.1289m/z	227.129	5.87903	neg	Gamma-Caprolactone	HMDB0003843	Organoheterocyclic compounds	Lactones	Gamma butyrolactones	*		39.7	0	2M-H	C6H10O2	0.0982879	2790.96	2821.37	2656.63	3004.95	2730.66	873.979	652.246	928.671	1116.32	1125.81	780.652	714.036	1012.7	952.888	850.555	877.823
6.91_367.2126m/z	367.213	6.91215	neg	r-limonene	HMDB0257077	Lipids and lipid-like molecules	Prenol lipids	Monoterpenoids	**	C06099	39.7	0	2M-H	C10H16O3	-0.146389	3607.03	3583.73	3974.13	4227.15	3853.25	5.88962e-06	5.88962e-06	5.88962e-06	43.1267	383.147	5.88962e-06	5.88962e-06	984.329	315.013	374.12	5.88962e-06
6.96_287.1499m/z	287.15	6.96315	neg	4-Hydroxycyclohexylcarboxylic acid	HMDB0001988	Organic oxygen compounds	Organooxygen compounds	Alcohols and polyols	*		39.7	0	2M-H	C7H12O3	-0.277809	1275.05	1113.42	1118.09	1199.19	1322.07	1261.8	1168.81	1065.74	1133.33	1214.7	1146.67	1092.02	1335.23	1513.45	1209.72	1148.98
7.07_179.9767n	358.953	7.0706	neg	2-dimethylarsinoyl-acetic acid	LMFA00000035	Lipids and lipid-like molecules	Fatty Acyls	Other Fatty Acyls			39.7	0	M+FA-H, 2M-H	C4H9AsO3	-0.238245	6533.39	7100.38	7554.65	7883.52	7348.88	8166.07	6867.25	7679.8	9385.95	6997.94	7376.13	7981.42	6732.44	7147.67	7328.21	8525.78
9.31_191.1078m/z	191.108	9.31052	neg	3-Methyl-2-cyclopenten-1-one	HMDB0031546	Organic oxygen compounds	Organooxygen compounds	Carbonyl compounds	*		39.7	0	2M-H	C6H8O	0.0319103	784.159	787.331	848.36	828.027	874.834	130.56	40.8694	63.7087	112.297	5.88962e-06	31.108	41.6501	52.7206	103.415	57.0396	32.4549
9.46_251.1287m/z	251.129	9.46088	neg	Methyl sorbate	86362	Lipids and lipid-like molecules	Fatty Acyls	Fatty acid esters	*		39.7	0	2M-H	C7H10O2	-0.582672	842.459	801.633	872.226	938.151	900.058	1081.82	867.321	1005.97	1000.19	892.748	856.321	1043.22	933.294	1028.07	820.091	850.18
9.86_179.1078m/z	179.108	9.86488	neg	p-Cymene	41091	Lipids and lipid-like molecules	Prenol lipids	Monoterpenoids	**	C06575	39.7	0	M+FA-H	C10H14	0.00817687	2312.5	2103.14	2126.32	2313.71	2775.09	1274.11	1990.12	803.439	1707.52	775.109	1963.21	2121.78	1477.91	2165.29	2393.04	2509.06
0.67_216.9511m/z	216.951	0.669317	pos	(alpha-D-mannosyl)7-beta-D-mannosyl-diacetylchitobiosyl-L-asparagine, isoform B (protein)	HMDB0062252	Benzenoids	Phenol ethers	Anisoles			39.6	0	M+H-H2O	C7H7IO	1.00923	940.126	1130.02	1332.67	1425.52	1348.54	329.975	362.944	88.1381	190.909	190.591	1319.17	589.094	174.101	303.464	240.951	585.045
0.68_275.0562m/z	275.056	0.676333	neg	Salicylic acid	HMDB0001895	Benzenoids	Benzene and substituted derivatives	Benzoic acids and derivatives	***	C00805	39.6	0	2M-H	C7H6O3	0.340662	464.078	608.729	523.782	634.171	591.116	403.469	743.5	593.74	490.03	659.929	762.902	810.117	1122.75	757.352	1134.5	508.244
0.85_234.0855n	257.075	0.84955	pos	Aspartyl-Threonine	HMDB0028763	Organic acids and derivatives	Carboxylic acids and derivatives	Amino acids, peptides, and analogues	*		39.6	2.39	M+Na, M+K	C8H14N2O6	1.217	60055.1	63612.9	61685.8	63367	66631.6	795.935	2446.79	1433.95	708.251	2261.74	1080.86	1125.5	3177.05	2956.83	2406.45	4253.88
0.91_187.1088m/z	187.109	0.90975	neg	Alanylvaline	HMDB0028700	Organic acids and derivatives	Carboxylic acids and derivatives	Amino acids, peptides, and analogues	*		39.6	3.35	M-H	C8H16N2O3	-0.0271516	773.794	714.545	816.136	777.886	623.778	332.942	3961.2	1333.08	480.01	965.327	2365.89	2806.44	4899.92	1524.33	3133.65	778.387
1.13_146.0823m/z	146.082	1.13103	neg	Betaine aldehyde	278	Organic nitrogen compounds	Organonitrogen compounds	Quaternary ammonium salts	**	C00576	39.6	0	M+FA-H	C5H11NO	0.190252	535.009	502.188	574.678	722.51	709.412	119.655	152.248	215.223	83.5902	155.366	173.436	83.1531	162.448	83.1976	163.22	164.495
1.20_140.0353m/z	140.035	1.19978	neg	2-aminomuconic acid semialdehyde	LMFA01060191	Organic acids and derivatives	Carboxylic acids and derivatives	Amino acids, peptides, and analogues	**	C03824	39.6	0	M-H	C6H7NO3	-0.0617074	682.166	621.431	722.095	701.149	679.949	317.82	1438.05	578.645	385.83	1139.01	1769.9	2264.44	965.326	1061	1285.24	1938.52
1.26_405.1868n	406.194	1.25552	pos	imidapril	96172	Organic acids and derivatives	Carboxylic acids and derivatives	Amino acids, peptides, and analogues			39.6	18.4	M+H, M+Na	C20H27N3O6	-7.91648	95.0876	104.513	60.5494	106.086	110.506	5.88962e-06	22427.6	2570.35	5.88962e-06	4829.04	2766.74	1966.77	21999.1	7096.75	7320.72	3286.96
1.62_160.1084m/z	160.108	1.62113	pos	delta-Guanidinovaleric acid	69638	Unclassified	Unclassified	Unclassified			39.6	4.27	M+H	C6H13N3O2	1.90643	213.538	212.374	201.275	208.178	266.927	335.324	234.42	304.024	468.688	440.526	104.71	213.587	292.723	751.061	119.095	1813.56
1.75_150.0555m/z	150.055	1.75082	pos	5,6-Dihydroxyindole	7009	Organoheterocyclic compounds	Indoles and derivatives	Hydroxyindoles	**	C05578	39.6	7.53	M+H	C8H7NO2	3.33365	1811.18	1632.19	1595.69	1872.9	2162.16	522.881	475.227	607.973	621.371	408.124	508.59	629.787	300.915	540.52	332.5	887.368
10.02_250.2168m/z	250.217	10.0225	pos	2,4-Dodecadienoic acid pyrrolidide	93476	Organoheterocyclic compounds	Pyrrolidines	N-acylpyrrolidines			39.6	3.28	M+H	C16H27NO	1.09282	133.999	252.565	145.858	147.218	146.484	2248.75	6056.57	5648.87	2606.52	9863.02	3206.37	2309.37	3960.6	8129.86	3372.58	7466.67
10.27_414.2046n	437.194	10.2743	pos	Armillarin	HMDB0039380	Lipids and lipid-like molecules	Prenol lipids	Sesquiterpenoids	*		39.6	2.91	M+H, M+Na, M+NH4, M+H-H2O	C24H30O6	0.889369	1.70499e+06	1.58771e+06	2.11323e+06	1.82994e+06	1.79961e+06	1.22718e+06	1.11762e+06	1.13362e+06	1.41196e+06	1.15617e+06	997841	926917	781140	1.39274e+06	904674	2.21019e+06
11.01_363.2541m/z	363.254	11.0059	neg	2,2,7,7-Tetramethyl-1,6-dioxaspiro[4.4]non-3-ene	HMDB0030006	Organic oxygen compounds	Organooxygen compounds	Ethers	*		39.6	0	2M-H	C11H18O2	0.0749975	715.145	417.428	745.659	532.232	750.151	5.88962e-06	5.88962e-06	117.883	67.5865	528.933	5.88962e-06	5.88962e-06	2195.72	303.042	177.962	5.88962e-06
11.08_309.2072m/z	309.207	11.0767	neg	CEDRYL ACETATE	44609	Lipids and lipid-like molecules	Prenol lipids	Sesquiterpenoids	*		39.6	0	M+FA-H	C17H28O2	0.236256	758.492	670.147	703.346	649.319	505.928	323.288	308.137	193.661	299.759	141.791	154.168	274.657	68.4278	281.248	203.232	442.136
11.15_310.1549m/z	310.155	11.1497	pos	Cinereain	HMDB0035218	Organoheterocyclic compounds	Diazines	Pyrimidines and pyrimidine derivatives			39.6	7.74	M+H-H2O	C18H21N3O3	-0.436718	8713.56	8445.5	7573.8	7334.09	7173.59	2653.9	2100.7	2140.25	652.408	2132.26	2330.04	3369.4	1279.91	1472.64	1753.72	2321.66
11.61_282.2567n	283.264	11.6131	pos	Vaccenic acid	HMDB0003231	Lipids and lipid-like molecules	Fatty Acyls	Fatty acids and conjugates	*	C08367	39.6	17	M+H, M+Na	C18H34O2	3.00497	5039.4	4248.06	4988.89	4804.6	4434.08	4255.51	4552.43	4570.4	4251.55	7213.42	3667.85	4707.7	8810.93	7054.07	3035.95	4832.17
11.91_484.3408n	507.33	11.9135	pos	(25S)-5alpha-cholestan-3beta,6alpha,7beta,8beta,15alpha,16beta,26-heptol	LMST01010327	Unclassified	Unclassified	Unclassified			39.6	3.26	M+Na, M+K, M+NH4, M+H	C27H48O7	1.55171	9835.03	10970.5	11972.4	10771.2	10277.5	16497.2	14977.3	16686.2	13461.2	17211.3	15186.6	144873	18270.9	45002.7	735983	137003
12.04_281.2479m/z	281.248	12.0431	pos	Tetrabutylammonium	85164	Unclassified	Unclassified	Unclassified			39.6	0	M+K	C16H36N+	-0.0233416	1675.08	1355.8	1909.27	1774.51	2188.19	932.416	883.428	1200.24	1275.3	2284.64	996.162	1852.47	976.708	1423.38	9685.05	867.512
12.28_295.2276m/z	295.228	12.2763	neg	15-Hydroxy-9Z,15Z-octadecadienoic acid	LMFA02000315	Lipids and lipid-like molecules	Fatty Acyls	Octadecanoids			39.6	5.07	M-H	C18H32O3	-0.820954	8945.13	8312.14	7887.76	8002.04	8103.67	532.794	621.348	623.668	840.968	568.42	1682.24	861.721	691.765	1153.09	434.974	1054.6
13.84_281.2483m/z	281.248	13.8422	neg	Ethyl 9-hexadecenoate	LMFA07010633	Lipids and lipid-like molecules	Fatty Acyls	Fatty acid esters	*		39.6	3.77	M-H	C18H34O2	-0.967944	10342.4	12100.9	8240.6	6789.88	9606.99	5487.72	20174.6	8477.71	2900.1	12189.4	25086.3	23907.8	20480.6	15150.2	11202.5	9901.43
15.18_227.2017m/z	227.202	15.1776	neg	2-Heptanone	HMDB0003671	Organic oxygen compounds	Organooxygen compounds	Carbonyl compounds	*	C08380	39.6	0	2M-H	C7H14O	0.0234504	314.166	502.652	451.819	621.734	499.537	742.988	442.483	632.372	682.779	439.808	549.151	388.16	1131.89	484.552	640.818	779.995
15.33_213.0670m/z	213.067	15.3346	neg	Nitrosobenzene	44790	Unclassified	Unclassified	Unclassified			39.6	0	2M-H	C6H5NO	0.379313	133.444	143.046	130.254	139.309	183.742	157.175	134.72	145.495	172.785	161.612	96.2076	201.312	198.699	114.208	216.907	218.02
2.64_251.0786m/z	251.079	2.63642	neg	Imidazoleacetic acid	6445	Organoheterocyclic compounds	Azoles	Imidazoles	**	C02835	39.6	0	2M-H	C5H6N2O2	0.178729	1976.42	2385.71	2071.34	2385.42	2380.26	5.88962e-06	117.182	51.4266	5.88962e-06	231.302	82.7856	5.88962e-06	5.88962e-06	74.6295	5.88962e-06	247.935
3.06_357.0892m/z	357.089	3.05928	neg	N1-(5-Phospho-a-D-ribosyl)-5,6-dimethylbenzimidazole	HMDB0003882	Nucleosides, nucleotides, and analogues	Benzimidazole ribonucleosides and ribonucleotides	Unclassified	***	C04778	39.6	13.7	M-H	C14H19N2O7P	9.69484	22139.8	22504	20867	22762.3	24623.2	5.88962e-06	1140.17	5.88962e-06	5.88962e-06	5.88962e-06	11190.9	19069.6	5.88962e-06	956.56	5.88962e-06	6507.07
3.92_135.0451m/z	135.045	3.92397	neg	3-Butyn-1-al	HMDB0006853	Organic oxygen compounds	Organooxygen compounds	Carbonyl compounds	**	C06145	39.6	0	2M-H	C4H4O	-0.0353007	546.349	489.644	497.607	549.162	558.904	330.258	323.84	238.036	306.544	302.183	301.377	248.959	352.371	639.997	334.672	357.437
4.18_142.0662m/z	142.066	4.1801	neg	Tryptophol	HMDB0003447	Organoheterocyclic compounds	Indoles and derivatives	Indoles	**	C00955	39.6	0.516	M-H2O-H	C10H11NO	-0.356265	160.086	135.375	153.111	146.963	162.228	7431.17	648.333	1798.65	2636.53	1351.12	1305.62	373.59	2021.3	4246.51	238.309	511.427
4.26_252.1579n	275.147	4.25535	pos	Hexazinone	HMDB0253153	Unclassified	Unclassified	Unclassified			39.6	5.3	M+H, M+Na, M+NH4	C12H20N4O2	-3.01387	3634.26	4309.24	3341.6	4388.46	4487.36	14180.1	20863.7	33042.7	34360	57740.1	38619.3	19721	19600.4	6726.45	4093.03	45884.1
4.40_172.0404m/z	172.04	4.39737	neg	1-Nitronaphthalene	69765	Benzenoids	Naphthalenes	Nitronaphthalenes	**	C14040	39.6	0	M-H	C10H7NO2	0.0965618	43.1009	31.5524	36.012	62.7299	35.5848	154.427	189.288	101.111	194.161	154.453	76.502	190.66	358.609	195.366	203.143	62.67
[truncated: 13,475 more rows]
